# Supplementary material
Source: publisher site journal article supplement (https://www.dovepress.com/get_supplementary_file.php?f=131386.xlsx)
Supplement: Supplementary file 1 [file get_supplementary_file.php]

## Sheet: DEGs
id	baseMean	baseMeanA	baseMeanB	foldChange	log2FoldChange	pval	padj	Change
SCARA5	436.304	6217.37	170.989	0.0275019	-5.18433	6.28069e-27	2.08915e-22	down-regulation
CFD	1673.52	14280.6	1094.93	0.0766728	-3.70514	1.63168e-24	2.71373e-20	down-regulation
FOS	24178.8	156799	18092.3	0.115385	-3.11547	3.18774e-24	2.71513e-20	down-regulation
PI16	764.298	11853.5	255.375	0.0215443	-5.53655	3.26504e-24	2.71513e-20	down-regulation
DUSP1	13139	85260.3	9829.1	0.115283	-3.11674	7.64888e-23	5.08849e-19	down-regulation
SLIT3	2138.54	14192.7	1585.33	0.111701	-3.16229	1.17845e-20	5.96608e-17	down-regulation
FAM107A	411.623	4010.75	246.446	0.0614465	-4.02453	1.25553e-20	5.96608e-17	down-regulation
CLEC3B	267.462	3077.11	138.517	0.0450152	-4.47344	4.14374e-20	1.72292e-16	down-regulation
ADAMTS1	4138.42	30894.9	2910.46	0.0942051	-3.40805	7.7321e-20	2.5847e-16	down-regulation
CSRNP1	2351.09	13005	1862.14	0.143187	-2.80403	7.7705e-20	2.5847e-16	down-regulation
NR4A1	6413.19	57835.5	4053.23	0.070082	-3.83481	1.95985e-19	5.92642e-16	down-regulation
MFAP4	3952.45	26017.3	2939.81	0.112995	-3.14568	4.13675e-19	1.14667e-15	down-regulation
ADH1B	817.408	9524.35	417.814	0.043868	-4.51069	1.1758e-18	3.00852e-15	down-regulation
LTBP4	4476.74	21221.3	3708.27	0.174743	-2.5167	3.03229e-18	7.2045e-15	down-regulation
ITGA8	551.238	4149.49	386.101	0.0930478	-3.42588	5.19892e-17	1.15288e-13	down-regulation
GSN	22785.4	104293	19044.7	0.182607	-2.45319	6.80954e-17	1.41566e-13	down-regulation
ZFP36	16685.2	98565.7	12927.4	0.131155	-2.93066	1.54921e-16	3.0145e-13	down-regulation
ITIH5	1498.51	12195.7	1007.57	0.0826168	-3.59742	1.63127e-16	3.0145e-13	down-regulation
SDPR	871.616	7917.8	548.241	0.0692415	-3.85222	6.54808e-16	1.14636e-12	down-regulation
FOXF1	804.015	5153.94	604.381	0.117266	-3.09215	1.07786e-15	1.79265e-12	down-regulation
KLF4	2496.22	11475.3	2084.14	0.18162	-2.46101	1.47539e-15	2.32755e-12	down-regulation
AQP1	4304.83	19804.9	3593.47	0.181443	-2.46241	1.53943e-15	2.32755e-12	down-regulation
ABI3BP	750.947	5554.68	530.486	0.0955025	-3.38832	2.10525e-15	3.04465e-12	down-regulation
KLF2	957.131	5542.77	746.679	0.134712	-2.89205	2.3795e-15	3.29788e-12	down-regulation
CCDC69	2114.38	11746	1672.34	0.142375	-2.81223	3.74978e-15	4.98916e-12	down-regulation
C11orf96	2096.65	13834.6	1557.95	0.112612	-3.15056	5.40629e-15	6.91652e-12	down-regulation
PDK4	1913.72	15489.9	1290.66	0.0833223	-3.58515	8.76451e-15	1.07976e-11	down-regulation
SLC25A25	1151.73	6187.36	920.623	0.148791	-2.74864	9.49405e-15	1.12786e-11	down-regulation
EGR3	656.983	5670.04	426.915	0.0752932	-3.73134	1.56704e-14	1.79739e-11	down-regulation
BTG2	15177.3	61971	13029.7	0.210255	-2.24979	2.1734e-14	2.4098e-11	down-regulation
HLF	171.678	2152.33	80.7784	0.0375307	-4.73578	4.20432e-14	4.51123e-11	down-regulation
RCAN2	733.963	5121.2	532.616	0.104002	-3.26531	4.93152e-14	5.12616e-11	down-regulation
SPARCL1	7629.47	50617.5	5656.58	0.111751	-3.16163	5.67872e-14	5.72398e-11	down-regulation
OGN	359.804	4238.18	181.811	0.0428985	-4.54293	6.30064e-14	6.16407e-11	down-regulation
FENDRR	642.492	5558.14	416.895	0.0750062	-3.73685	7.24979e-14	6.89e-11	down-regulation
SOCS3	7375.26	32697.9	6213.11	0.190015	-2.39581	8.92696e-14	8.24826e-11	down-regulation
PLPP3	2624.86	11567.6	2214.45	0.191436	-2.38507	1.10691e-13	9.95111e-11	down-regulation
RHOB	12577.8	50460.3	10839.2	0.214807	-2.21889	1.35168e-13	1.18319e-10	down-regulation
MYADM	4937.74	22249.9	4143.22	0.186213	-2.42497	1.40858e-13	1.19625e-10	down-regulation
APOLD1	1513.59	6924.73	1265.25	0.182715	-2.45233	1.43854e-13	1.19625e-10	down-regulation
FOSB	9192.08	81401.4	5878.12	0.0722116	-3.79163	1.73421e-13	1.38616e-10	down-regulation
MRGPRF	796.224	5047	601.14	0.119108	-3.06966	1.75026e-13	1.38616e-10	down-regulation
EGR1	13340.9	101449	9297.23	0.091644	-3.44782	2.18079e-13	1.68697e-10	down-regulation
FGL2	1375.8	11046	931.995	0.0843738	-3.56706	2.64504e-13	1.99959e-10	down-regulation
KLF9	1618.14	8603.93	1297.53	0.150807	-2.72922	5.00745e-13	3.70139e-10	down-regulation
SVEP1	616.892	4013.74	460.998	0.114855	-3.12211	5.45999e-13	3.94816e-10	down-regulation
IER3	4580.09	21361.5	3809.93	0.178355	-2.48717	5.61682e-13	3.97516e-10	down-regulation
C16orf89	128.888	1406.67	70.2461	0.0499378	-4.32373	6.40743e-13	4.44021e-10	down-regulation
GEM	1053.45	7171.77	772.657	0.107736	-3.21443	1.21987e-12	8.28093e-10	down-regulation
NEGR1	421.156	4386.36	239.179	0.0545279	-4.19686	1.35235e-12	8.99661e-10	down-regulation
RGS2	2729.93	15691.2	2135.09	0.136069	-2.87759	1.59136e-12	1.03791e-09	down-regulation
PCOLCE2	349.428	3106.58	222.892	0.0717484	-3.80091	1.64222e-12	1.05049e-09	down-regulation
CYR61	10246.8	63080.7	7822.02	0.124	-3.01158	1.97358e-12	1.23863e-09	down-regulation
ZCCHC24	1262.18	6773.75	1009.23	0.148992	-2.7467	2.37809e-12	1.46486e-09	down-regulation
C7	1363.44	13367.6	812.52	0.0607827	-4.0402	2.77787e-12	1.68001e-09	down-regulation
NR4A2	1098.1	6346.17	857.252	0.135082	-2.88809	3.13434e-12	1.86174e-09	down-regulation
DIXDC1	693.846	4741.13	508.101	0.107169	-3.22205	3.25762e-12	1.90102e-09	down-regulation
MAFF	3327.34	12338.4	2913.79	0.236157	-2.08218	3.80805e-12	2.18391e-09	down-regulation
NR4A3	850.87	7823.46	530.872	0.0678564	-3.88137	6.14605e-12	3.46502e-09	down-regulation
TPPP	357.982	2706.64	250.193	0.0924366	-3.43539	7.80735e-12	4.32827e-09	down-regulation
CGNL1	478.398	3403.34	344.162	0.101125	-3.30579	1.01908e-11	5.55701e-09	down-regulation
CYBRD1	2773.19	11530.9	2371.26	0.205645	-2.28177	1.14119e-11	6.12249e-09	down-regulation
KANK2	4279.76	24688.1	3343.14	0.135415	-2.88454	1.28302e-11	6.77415e-09	down-regulation
C2orf40	127.934	1567.15	61.8834	0.0394878	-4.66245	1.93901e-11	1.00777e-08	down-regulation
DDR2	1271.57	6923.32	1012.19	0.1462	-2.77398	2.00532e-11	1.0262e-08	down-regulation
FNBP1	2465.96	11327.8	2059.26	0.181787	-2.45968	2.73162e-11	1.3767e-08	down-regulation
TIPARP	2295.78	8145.16	2027.33	0.248899	-2.00637	2.84086e-11	1.41038e-08	down-regulation
CHRM2	191.735	2125.2	103.001	0.0484663	-4.36687	3.20516e-11	1.56784e-08	down-regulation
JUN	12812.4	50877.8	11065.4	0.21749	-2.20098	3.33157e-11	1.60606e-08	down-regulation
LIMS2	1523.84	11551.2	1063.65	0.0920818	-3.44094	3.50441e-11	1.66524e-08	down-regulation
SYNE1	1473.14	6908.58	1223.68	0.177125	-2.49716	3.55473e-11	1.66537e-08	down-regulation
PER1	2647.52	10084.9	2306.2	0.228678	-2.12861	3.61899e-11	1.67192e-08	down-regulation
DUSP5	4482.54	18248.3	3850.78	0.211022	-2.24454	3.87101e-11	1.76386e-08	down-regulation
VIT	89.0529	1087.44	43.2332	0.0397569	-4.65265	4.02569e-11	1.78542e-08	down-regulation
TNXB	947.851	10363.7	515.723	0.0497625	-4.3288	4.75517e-11	2.05417e-08	down-regulation
HSPB8	3883.3	26255.1	2856.57	0.108801	-3.20024	5.27445e-11	2.24928e-08	down-regulation
PGM5	1984.62	25699.2	896.268	0.0348754	-4.84165	5.34542e-11	2.25069e-08	down-regulation
ITPR1	1328.31	7364.84	1051.27	0.142742	-2.80851	5.94808e-11	2.47314e-08	down-regulation
PYGM	204.575	2560.31	96.4615	0.0376757	-4.73022	6.46244e-11	2.65383e-08	down-regulation
ADAMTSL3	159.397	1727.54	87.4286	0.0506088	-4.30447	7.25045e-11	2.94112e-08	down-regulation
DCN	15761.2	80330.4	12797.9	0.159315	-2.65004	7.61165e-11	3.05044e-08	down-regulation
ACACB	715.93	3986.84	565.815	0.141921	-2.81684	7.7135e-11	3.05446e-08	down-regulation
AOC3	2357.2	18194.9	1630.35	0.0896049	-3.48028	8.06126e-11	3.15461e-08	down-regulation
LRRC3B	13.9385	198.935	5.44835	0.0273876	-5.19033	8.2423e-11	3.18795e-08	down-regulation
MRVI1	1423.19	9210.83	1065.79	0.11571	-3.11141	9.04407e-11	3.45785e-08	down-regulation
PAMR1	516.796	2955.98	404.853	0.136961	-2.86816	9.31902e-11	3.47061e-08	down-regulation
FBLN5	1233.3	5695.88	1028.5	0.180568	-2.46938	9.32945e-11	3.47061e-08	down-regulation
HSPB6	1969.42	24994.6	912.706	0.0365161	-4.77532	9.39047e-11	3.47061e-08	down-regulation
PDZRN3	692.797	4430.99	521.238	0.117635	-3.08762	9.91077e-11	3.60253e-08	down-regulation
SMTN	6134.33	44154.4	4389.45	0.0994113	-3.33045	9.96401e-11	3.60253e-08	down-regulation
AC013461.1	3134.51	20451.6	2339.77	0.114405	-3.12778	1.03155e-10	3.6895e-08	down-regulation
ANTXR2	2572.51	12257.1	2128.04	0.173618	-2.52601	1.11648e-10	3.95079e-08	down-regulation
PRELP	1633.8	14116.6	1060.92	0.0751537	-3.73401	1.2247e-10	4.28812e-08	down-regulation
CBX7	1319.19	6211.99	1094.64	0.176214	-2.5046	1.28905e-10	4.46095e-08	down-regulation
FERMT2	1928.36	11081.6	1508.28	0.136107	-2.87719	1.30088e-10	4.46095e-08	down-regulation
MXRA7	2915.85	12385.8	2481.24	0.20033	-2.31955	1.49068e-10	5.05355e-08	down-regulation
ADAMTS9-AS1	114.58	1542.2	49.0611	0.0318125	-4.97426	1.50408e-10	5.05355e-08	down-regulation
SMOC2	1768.44	10795.5	1354.15	0.125437	-2.99497	1.55193e-10	5.15213e-08	down-regulation
SLMAP	3503.65	18231.9	2827.72	0.155097	-2.68876	1.5644e-10	5.15213e-08	down-regulation
HBEGF	2091.56	11808.2	1645.63	0.139364	-2.84307	1.58073e-10	5.15488e-08	down-regulation
TGFBR3	2298.83	9110.91	1986.2	0.218002	-2.19758	1.67138e-10	5.34979e-08	down-regulation
CACNA1H	1299.92	10722.5	867.488	0.0809036	-3.62765	1.67266e-10	5.34979e-08	down-regulation
A2M	25516.5	106484	21800.7	0.204733	-2.28819	1.71972e-10	5.42658e-08	down-regulation
CPED1	475.738	4550.1	288.751	0.0634603	-3.978	1.7293e-10	5.42658e-08	down-regulation
AKAP12	2436.75	12765.3	1962.73	0.153755	-2.70129	1.80128e-10	5.59963e-08	down-regulation
ADGRA2	1652.56	7415.65	1388.07	0.187181	-2.41749	1.87534e-10	5.77588e-08	down-regulation
ANXA6	5078.53	21929.9	4305.16	0.196314	-2.34876	1.95648e-10	5.97051e-08	down-regulation
PALLD	9142.41	61179.1	6754.25	0.110401	-3.17917	2.19326e-10	6.63222e-08	down-regulation
ADAM33	374.324	2523.41	275.694	0.109255	-3.19423	2.79341e-10	8.37093e-08	down-regulation
MIR100HG	490.32	2974.36	376.318	0.126521	-2.98255	3.05477e-10	9.0724e-08	down-regulation
LAMC3	778.11	3643.33	646.614	0.177479	-2.49428	3.15596e-10	9.28997e-08	down-regulation
FXYD6	1009.42	7709.66	701.919	0.0910441	-3.45729	3.84431e-10	1.12169e-07	down-regulation
ATF3	5310.1	35533	3923.06	0.110406	-3.17911	4.05968e-10	1.17424e-07	down-regulation
ZEB1	1097.57	6554.54	847.133	0.129244	-2.95183	4.16426e-10	1.1941e-07	down-regulation
PLP1	80.6716	889.588	43.5474	0.0489523	-4.35248	4.21871e-10	1.19938e-07	down-regulation
RASL12	574.124	3704.51	430.458	0.116198	-3.10534	4.28807e-10	1.20876e-07	down-regulation
SGCA	253.303	2122.57	167.515	0.0789207	-3.66345	4.60243e-10	1.28648e-07	down-regulation
ACTA2	20816.6	153178	14742.1	0.096241	-3.3772	4.7905e-10	1.32789e-07	down-regulation
CFL2	1238.58	8844.87	889.496	0.100566	-3.31378	5.05002e-10	1.38825e-07	down-regulation
ABCA8	255.174	1920.52	178.745	0.0930707	-3.42553	5.40223e-10	1.45054e-07	down-regulation
TCF21	276.811	2985.78	152.486	0.0510709	-4.29136	5.40226e-10	1.45054e-07	down-regulation
FILIP1L	2033.87	10319.3	1653.62	0.160245	-2.64165	5.41336e-10	1.45054e-07	down-regulation
PDLIM3	2514.34	17166.8	1841.88	0.107293	-3.22037	5.5774e-10	1.47239e-07	down-regulation
MAMDC2	315.756	2617.74	210.109	0.0802633	-3.63912	5.79019e-10	1.51653e-07	down-regulation
NACC2	1371.97	6611.25	1131.52	0.171151	-2.54666	6.47298e-10	1.68212e-07	down-regulation
ADGRD1	344.881	3541.88	198.159	0.0559474	-4.15978	7.13801e-10	1.84055e-07	down-regulation
LPP	8098.15	46287.7	6345.48	0.137088	-2.86683	8.1562e-10	2.08692e-07	down-regulation
MYOCD	464.421	6039.23	208.572	0.0345363	-4.85574	8.22401e-10	2.08821e-07	down-regulation
DSTN	20089.9	71788.6	17717.3	0.246798	-2.0186	8.81557e-10	2.22146e-07	down-regulation
TMEM132C	40.1219	451.12	21.2597	0.0471264	-4.40732	9.55459e-10	2.38958e-07	down-regulation
CD34	2140.08	7976.29	1872.23	0.234725	-2.09096	1.02901e-09	2.55432e-07	down-regulation
TLN1	16103.8	60290.7	14075.9	0.233468	-2.09871	1.11194e-09	2.73974e-07	down-regulation
DNAJB5	715.961	4208.83	555.66	0.132023	-2.92114	1.153e-09	2.82002e-07	down-regulation
RNF150	377.227	3068.09	253.733	0.0827007	-3.59596	1.18424e-09	2.87529e-07	down-regulation
KCNMB1	684.681	6463.66	419.463	0.0648956	-3.94574	1.26563e-09	3.05062e-07	down-regulation
GLP2R	107.362	1570.11	40.2314	0.0256234	-5.2864	1.33182e-09	3.18707e-07	down-regulation
JAM3	1102.61	6090.34	873.702	0.143457	-2.80131	1.48235e-09	3.52195e-07	down-regulation
SLC2A4	246.925	3192.74	111.731	0.0349953	-4.83669	1.49526e-09	3.52744e-07	down-regulation
WFDC1	708.377	3551.07	577.916	0.162744	-2.61932	1.60612e-09	3.76229e-07	down-regulation
TP53INP2	2161.18	9287.36	1834.13	0.197487	-2.34017	1.63286e-09	3.76671e-07	down-regulation
FBLN2	3494.16	15073.6	2962.74	0.196551	-2.34702	1.64031e-09	3.76671e-07	down-regulation
ATP2B4	6699.39	24763.7	5870.35	0.237055	-2.07671	1.64198e-09	3.76671e-07	down-regulation
THSD4	1122.89	4636.5	961.642	0.207407	-2.26946	1.73408e-09	3.95072e-07	down-regulation
PTGS1	3350.91	37061.9	1803.79	0.0486697	-4.36083	1.84579e-09	4.16998e-07	down-regulation
PDE4D	1149.77	4993.8	973.351	0.194912	-2.35911	1.86024e-09	4.16998e-07	down-regulation
CRISPLD2	3444.5	13476.3	2984.1	0.221433	-2.17506	1.86792e-09	4.16998e-07	down-regulation
LMOD1	4034.72	46281.3	2095.87	0.0452854	-4.46481	1.91768e-09	4.25253e-07	down-regulation
PPP1R12B	4663.2	44841.6	2819.26	0.0628716	-3.99145	1.99334e-09	4.39102e-07	down-regulation
PSD	782.185	7266.99	484.573	0.0666813	-3.90657	2.11135e-09	4.56981e-07	down-regulation
PLIN4	1799.33	8968.77	1470.29	0.163935	-2.6088	2.11364e-09	4.56981e-07	down-regulation
BAG2	861.054	4503.29	693.899	0.154087	-2.69818	2.11572e-09	4.56981e-07	down-regulation
SORBS2	1348.12	11378.4	887.788	0.0780241	-3.67994	2.13411e-09	4.57981e-07	down-regulation
MYL9	24171.8	226320	14894.5	0.0658117	-3.92551	2.16873e-09	4.62426e-07	down-regulation
TMEM252	27.5118	382.482	11.2209	0.0293372	-5.09113	2.21211e-09	4.6867e-07	down-regulation
SVIL	6274.11	38043.7	4816.08	0.126593	-2.98172	2.25673e-09	4.75098e-07	down-regulation
C8orf4	4758.35	17530.8	4172.18	0.237992	-2.07102	2.4301e-09	5.08379e-07	down-regulation
PODN	1605.9	7284.3	1345.3	0.184685	-2.43686	2.5454e-09	5.25886e-07	down-regulation
LAMA2	907.925	4345.95	750.141	0.172607	-2.53444	2.56368e-09	5.26394e-07	down-regulation
PLPPR4	149.583	1223.04	100.318	0.0820232	-3.60782	2.58219e-09	5.2694e-07	down-regulation
RASSF3	1911.03	8563.84	1605.71	0.187498	-2.41505	2.69573e-09	5.46757e-07	down-regulation
HAND2-AS1	117.791	1298.86	63.5872	0.0489562	-4.35236	2.71913e-09	5.48161e-07	down-regulation
FLNA	69942.3	503613	50039.6	0.0993613	-3.33117	2.75947e-09	5.52941e-07	down-regulation
TGFB1I1	1883.33	8041.7	1600.7	0.19905	-2.32879	2.80611e-09	5.58919e-07	down-regulation
AOX1	229.575	1881.02	153.784	0.0817556	-3.61254	2.92723e-09	5.79575e-07	down-regulation
HMCN2	277.051	2383.84	180.363	0.0756604	-3.72432	2.98166e-09	5.86857e-07	down-regulation
RBFOX3	246.282	3581.75	93.2053	0.0260223	-5.26411	3.04006e-09	5.94833e-07	down-regulation
FILIP1	416.053	4645.01	221.97	0.0477868	-4.38725	3.19231e-09	6.19753e-07	down-regulation
CELF2	729.179	3756.27	590.255	0.157139	-2.66989	3.20469e-09	6.19753e-07	down-regulation
TNS2	1984.32	7483.12	1731.96	0.231449	-2.11123	3.24392e-09	6.23713e-07	down-regulation
FHL1	3734.44	41976.9	1979.35	0.0471534	-4.4065	3.28148e-09	6.2731e-07	down-regulation
CSRP1	17838.7	134030	12506.3	0.0933096	-3.42183	3.31804e-09	6.30674e-07	down-regulation
DMD	827.656	7642.94	514.877	0.0673664	-3.89183	3.37416e-09	6.37697e-07	down-regulation
HPSE2	269.809	2377.31	173.088	0.0728083	-3.77975	3.62933e-09	6.82047e-07	down-regulation
WWTR1	2824.61	10864.6	2455.62	0.226021	-2.14547	3.67161e-09	6.84267e-07	down-regulation
KCNMA1	760.87	7754.76	439.894	0.0567257	-4.13985	3.68228e-09	6.84267e-07	down-regulation
MSRB3	1740.48	14228.7	1167.35	0.0820423	-3.60749	4.28087e-09	7.82388e-07	down-regulation
TPM1	13877.1	107967	9558.95	0.0885355	-3.4976	4.47159e-09	8.12778e-07	down-regulation
ADCY5	630.474	4497.55	453	0.100722	-3.31156	4.49786e-09	8.1311e-07	down-regulation
MYLK	9274.77	100452	5090.33	0.0506745	-4.3026	4.59642e-09	8.26436e-07	down-regulation
PGM5P4	10.404	153.819	3.82214	0.0248482	-5.33071	4.64526e-09	8.30728e-07	down-regulation
NFIX	2097.63	8413.53	1807.76	0.214864	-2.2185	4.77834e-09	8.49956e-07	down-regulation
TSPAN18	780.007	3966.96	633.745	0.159756	-2.64606	4.80793e-09	8.50671e-07	down-regulation
PGM5-AS1	69.481	977.446	27.8111	0.0284529	-5.13528	5.00338e-09	8.792e-07	down-regulation
P2RX1	533.446	6155.94	275.409	0.0447386	-4.48233	5.02204e-09	8.792e-07	down-regulation
RBPMS2	567.878	4859.33	370.928	0.0763331	-3.71155	5.31749e-09	9.21719e-07	down-regulation
CLIC4	7172.84	29423.3	6151.68	0.209075	-2.25791	5.32033e-09	9.21719e-07	down-regulation
SORCS1	43.3089	485.835	22.9998	0.0473407	-4.40077	5.73428e-09	9.88286e-07	down-regulation
DACT3	447.127	3081.45	326.228	0.105868	-3.23966	5.81702e-09	9.97379e-07	down-regulation
MIR22HG	1103.14	4248.29	958.792	0.225689	-2.14759	5.96463e-09	1.01744e-06	down-regulation
CTC-296K1.4	57.5207	822.318	22.4213	0.027266	-5.19675	6.39039e-09	1.08451e-06	down-regulation
PRDM6	299.111	2151.08	214.117	0.0995393	-3.32859	7.02759e-09	1.18659e-06	down-regulation
FAM129A	3679.28	32916.6	2337.47	0.0710117	-3.8158	8.06955e-09	1.34883e-06	down-regulation
MYOM1	299.13	3601.33	147.579	0.0409791	-4.60897	8.59964e-09	1.43025e-06	down-regulation
NEXN	825.771	6113.54	583.095	0.0953777	-3.3902	9.02368e-09	1.49331e-06	down-regulation
COL14A1	2372.12	13686.4	1852.87	0.135381	-2.8849	9.86012e-09	1.61565e-06	down-regulation
BIN1	1634.29	6492.27	1411.34	0.217388	-2.20166	1.00176e-08	1.63342e-06	down-regulation
TMOD1	230.484	1879.9	154.786	0.0823373	-3.60231	1.03479e-08	1.67903e-06	down-regulation
RGS5	2773.32	12996.5	2304.14	0.177289	-2.49583	1.04868e-08	1.69331e-06	down-regulation
SPEG	955.186	6460.2	702.54	0.108749	-3.20093	1.08763e-08	1.74772e-06	down-regulation
NTRK3	74.0383	692.231	45.6671	0.0659709	-3.92203	1.27281e-08	2.03545e-06	down-regulation
MATN2	2471.84	10520.4	2102.46	0.199845	-2.32304	1.31635e-08	2.08807e-06	down-regulation
CTC-296K1.3	79.9603	1090.85	33.5669	0.0307713	-5.02227	1.3221e-08	2.08807e-06	down-regulation
GPRASP1	335.729	2198.21	250.253	0.113844	-3.13487	1.32454e-08	2.08807e-06	down-regulation
ASB2	392.051	3096.1	267.952	0.0865452	-3.5304	1.39544e-08	2.18945e-06	down-regulation
ALDH1B1	2926.23	15089.1	2368.03	0.156937	-2.67174	1.4056e-08	2.19504e-06	down-regulation
NT5DC3	686.29	3841.99	541.463	0.140933	-2.82692	1.42339e-08	2.20764e-06	down-regulation
NFASC	611.057	3490.97	478.887	0.137179	-2.86587	1.42694e-08	2.20764e-06	down-regulation
SRPX	902.632	4148.94	753.647	0.181648	-2.46078	1.44665e-08	2.22778e-06	down-regulation
KLHL41	54.1327	711.683	23.9553	0.03366	-4.89282	1.57838e-08	2.40143e-06	down-regulation
ASB5	183.69	2552.67	74.9686	0.0293687	-5.08958	1.58046e-08	2.40143e-06	down-regulation
NCS1	2644.03	10410.7	2287.58	0.219733	-2.18618	1.58108e-08	2.40143e-06	down-regulation
PKIG	2118.29	8145.79	1841.67	0.226088	-2.14504	1.60502e-08	2.42515e-06	down-regulation
MAP1B	2449.66	17720.2	1748.84	0.098692	-3.34092	1.61616e-08	2.42515e-06	down-regulation
PER2	909.599	3671.18	782.86	0.213245	-2.22942	1.61857e-08	2.42515e-06	down-regulation
PPP1R14A	599.236	4016.41	442.41	0.11015	-3.18245	1.62987e-08	2.43114e-06	down-regulation
ARID5A	1473.43	5601.08	1283.99	0.22924	-2.12507	1.70984e-08	2.53904e-06	down-regulation
RAB23	653.87	4080.93	496.589	0.121685	-3.03877	1.82459e-08	2.69739e-06	down-regulation
TNS1	9802.4	108080	5292.06	0.0489642	-4.35213	1.84599e-08	2.71696e-06	down-regulation
CNN1	9516.19	116717	4596.34	0.0393801	-4.66639	1.97634e-08	2.89599e-06	down-regulation
MYH11	63311	951336	22556.3	0.0237101	-5.39836	2.18746e-08	3.15374e-06	down-regulation
C1QTNF7	135.973	1182.22	87.9568	0.0743997	-3.74856	2.1941e-08	3.15374e-06	down-regulation
MCAM	5242.25	18815.5	4619.32	0.245506	-2.02617	2.19565e-08	3.15374e-06	down-regulation
PDE1C	166.223	1490.53	105.446	0.0707439	-3.82125	2.19964e-08	3.15374e-06	down-regulation
GATA6	359.84	2077.67	281.003	0.135249	-2.88631	2.24956e-08	3.19373e-06	down-regulation
KIAA1644	303.721	3369.72	163.011	0.0483751	-4.36959	2.25634e-08	3.19373e-06	down-regulation
TACR2	216.867	2461.33	113.86	0.0462596	-4.4341	2.41378e-08	3.38992e-06	down-regulation
TAGLN	24087.1	173544	17227.9	0.0992714	-3.33248	2.41789e-08	3.38992e-06	down-regulation
AFF3	197.724	1816.88	123.415	0.067927	-3.87987	2.42552e-08	3.38992e-06	down-regulation
SLIT2	404.679	2248.69	320.051	0.142328	-2.81271	2.74068e-08	3.79847e-06	down-regulation
FAM180B	6.12418	85.5247	2.4802	0.0289998	-5.10781	2.79641e-08	3.84368e-06	down-regulation
BDKRB2	965.21	3592.57	844.631	0.235105	-2.08862	2.84454e-08	3.89375e-06	down-regulation
SYNM	7139.89	108914	2469.11	0.0226703	-5.46305	2.85883e-08	3.89727e-06	down-regulation
VSTM4	561.208	2668.61	464.491	0.174057	-2.52237	2.99424e-08	4.0652e-06	down-regulation
PDZRN4	151.844	1993.66	67.3164	0.0337652	-4.88832	3.02727e-08	4.09334e-06	down-regulation
SLC25A23	1877.9	7639.52	1613.48	0.211202	-2.24331	3.07212e-08	4.12048e-06	down-regulation
DMPK	2764.14	10694.4	2400.19	0.224435	-2.15563	3.10281e-08	4.14493e-06	down-regulation
PLCB4	379.685	2431.06	285.54	0.117455	-3.08982	3.19112e-08	4.24585e-06	down-regulation
ITPKB	2021.21	7929.48	1750.06	0.220703	-2.17982	3.24212e-08	4.29652e-06	down-regulation
ARHGEF25	831.288	3884.4	691.17	0.177935	-2.49058	3.25509e-08	4.29659e-06	down-regulation
AF001548.6	15.2227	230.183	5.35735	0.0232743	-5.42512	3.33169e-08	4.38031e-06	down-regulation
ARID5B	3279.86	11863.1	2885.94	0.243269	-2.03937	3.35955e-08	4.39956e-06	down-regulation
ADARB1	1487.33	7715.45	1201.5	0.155726	-2.68291	3.47751e-08	4.53618e-06	down-regulation
CALD1	13672.8	92909	10036.3	0.108023	-3.21059	3.50793e-08	4.55798e-06	down-regulation
GFRA1	194.487	1327.56	142.487	0.10733	-3.21988	3.60791e-08	4.66965e-06	down-regulation
SORBS1	3787.64	42341.1	2018.28	0.0476672	-4.39086	4.24692e-08	5.45426e-06	down-regulation
PLAC9	244.431	1502.49	186.693	0.124256	-3.00861	4.33533e-08	5.53561e-06	down-regulation
NFIL3	1684.89	6091.01	1482.68	0.24342	-2.03848	4.34355e-08	5.53561e-06	down-regulation
RD3L	0.907103	15.0485	0.258101	0.0171512	-5.86554	4.52588e-08	5.74597e-06	down-regulation
TPSAB1	470.557	2181.31	392.044	0.179729	-2.4761	4.62415e-08	5.84841e-06	down-regulation
AF131217.1	122.782	1447.93	61.966	0.0427964	-4.54637	4.87295e-08	6.11656e-06	down-regulation
AP000892.6	553.453	4767.46	360.057	0.0755238	-3.72693	5.13907e-08	6.42635e-06	down-regulation
EGR2	541.853	2348.15	458.955	0.195454	-2.3551	5.88806e-08	7.33538e-06	down-regulation
CASQ2	597.419	7729.06	270.122	0.0349489	-4.83861	6.12652e-08	7.60397e-06	down-regulation
PRUNE2	1243.18	14190	649.003	0.0457367	-4.4505	6.35317e-08	7.85596e-06	down-regulation
DTNA	541.647	5226.35	326.649	0.0625004	-3.99999	6.41765e-08	7.90106e-06	down-regulation
CACNA1C	639.615	4023.11	484.334	0.120388	-3.05424	6.43714e-08	7.90106e-06	down-regulation
JPH2	822.621	6637.77	555.742	0.0837242	-3.57821	6.50678e-08	7.95717e-06	down-regulation
GNAL	388.35	2333.32	299.088	0.128182	-2.96374	6.62692e-08	8.07441e-06	down-regulation
FOSL1	2260.75	8020.48	1996.41	0.248914	-2.00628	6.74775e-08	8.19162e-06	down-regulation
CLDN5	755.455	3470.11	630.869	0.181801	-2.45957	7.51903e-08	9.06179e-06	down-regulation
RP11-887P2.5	30.0154	350.276	15.3174	0.0437295	-4.51525	7.63279e-08	9.16569e-06	down-regulation
CHRM3	333.26	2336.41	241.328	0.10329	-3.27522	7.71711e-08	9.23361e-06	down-regulation
BMP5	153.224	1124.25	108.66	0.0966507	-3.37108	7.93351e-08	9.45851e-06	down-regulation
SGCD	342.317	2413.49	247.263	0.10245	-3.287	8.31091e-08	9.87306e-06	down-regulation
KCND3	349.873	1980.73	275.027	0.138851	-2.84839	8.46207e-08	1.00169e-05	down-regulation
KCNB1	72.0221	917.403	33.2245	0.0362158	-4.78724	8.59281e-08	1.01356e-05	down-regulation
STON1	561.92	2802.57	459.089	0.16381	-2.6099	8.65536e-08	1.01733e-05	down-regulation
ACTC1	4156.76	61582.9	1521.26	0.0247027	-5.33919	8.79989e-08	1.03067e-05	down-regulation
SPON1	1745.92	7918.37	1462.64	0.184715	-2.43663	8.86215e-08	1.03432e-05	down-regulation
PRKG1	362.816	2172.19	279.777	0.128799	-2.95681	9.2238e-08	1.07277e-05	down-regulation
EPHA7	287.208	2046.04	206.489	0.100921	-3.3087	9.37873e-08	1.08698e-05	down-regulation
SOBP	264.478	1844.58	191.961	0.104067	-3.26441	1.10415e-07	1.26645e-05	down-regulation
PTRF	13711.9	49377.2	12075.1	0.244547	-2.03181	1.13387e-07	1.29608e-05	down-regulation
FYCO1	2604.24	9524.27	2286.65	0.240087	-2.05837	1.15831e-07	1.31575e-05	down-regulation
TPM2	15739.6	104805	11652.1	0.111179	-3.16904	1.15899e-07	1.31575e-05	down-regulation
F10	102.912	863.993	67.9828	0.0786844	-3.66778	1.18581e-07	1.34162e-05	down-regulation
PTGIS	2376.84	17946.9	1662.27	0.0926215	-3.43251	1.38767e-07	1.55415e-05	down-regulation
PPM1L	1272.34	4916.24	1105.11	0.224787	-2.15337	1.47833e-07	1.64775e-05	down-regulation
EMP1	9085.03	53140.9	7063.15	0.132914	-2.91144	1.48116e-07	1.64775e-05	down-regulation
TEAD1	3039.06	10935.7	2676.66	0.244764	-2.03054	1.55756e-07	1.72697e-05	down-regulation
LINC01082	41.4355	411.214	24.465	0.0594944	-4.0711	1.58388e-07	1.74775e-05	down-regulation
KIAA1462	1660.26	6374.2	1443.92	0.226526	-2.14225	1.59425e-07	1.75015e-05	down-regulation
RANBP3L	78.3688	962.174	37.8077	0.039294	-4.66955	1.63056e-07	1.78403e-05	down-regulation
FAXDC2	382.729	2157.9	301.26	0.139608	-2.84054	1.65549e-07	1.79956e-05	down-regulation
NR3C2	257.899	1736.58	190.037	0.109432	-3.1919	1.67652e-07	1.81648e-05	down-regulation
LMO3	533.108	4772.09	338.565	0.0709468	-3.81712	1.706e-07	1.83776e-05	down-regulation
ITGA5	8807.07	42740.8	7249.72	0.169621	-2.55961	1.7072e-07	1.83776e-05	down-regulation
AKAP6	260.617	2373.18	163.664	0.068964	-3.85801	1.73606e-07	1.85089e-05	down-regulation
DPT	788.112	5981.59	549.764	0.0919092	-3.44365	1.73609e-07	1.85089e-05	down-regulation
BHMT2	94.8921	944.558	55.8978	0.0591788	-4.07878	1.84944e-07	1.96077e-05	down-regulation
JAM2	359.84	1884.89	289.85	0.153775	-2.70111	1.95593e-07	2.05886e-05	down-regulation
ACTG2	20290.9	224434	10922.1	0.0486649	-4.36097	2.00402e-07	2.10283e-05	down-regulation
GAS7	1029.66	4109.46	888.317	0.216164	-2.2098	2.09904e-07	2.19561e-05	down-regulation
ITGA1	2368.82	9298.84	2050.78	0.220542	-2.18088	2.30822e-07	2.40685e-05	down-regulation
SAMD4A	798.159	3462.71	675.873	0.195186	-2.35708	2.38968e-07	2.484e-05	down-regulation
ADGRG4	1.86958	27.1693	0.708478	0.0260764	-5.26111	2.44779e-07	2.53647e-05	down-regulation
SLC8A1	665.72	3238.97	547.624	0.169073	-2.56428	2.49015e-07	2.56439e-05	down-regulation
NFIA	1744.4	6327.67	1534.05	0.242436	-2.04433	2.5426e-07	2.61033e-05	down-regulation
MAP1A	950.64	6378.9	701.517	0.109975	-3.18476	2.72547e-07	2.7809e-05	down-regulation
TACR3	22.9828	265.076	11.8722	0.0447879	-4.48075	2.93041e-07	2.98086e-05	down-regulation
SYNPO2	7898.84	112113	3116.06	0.027794	-5.16909	2.9474e-07	2.98901e-05	down-regulation
RP11-6O2.3	53.8661	592.532	29.1447	0.0491867	-4.34559	2.96947e-07	3.00223e-05	down-regulation
TBX20	42.5125	498.37	21.5915	0.0433242	-4.52868	3.01169e-07	3.0357e-05	down-regulation
COL4A6	2223.11	8988.78	1912.61	0.212778	-2.23258	3.09296e-07	3.10819e-05	down-regulation
ITGA7	1298.87	7719.06	1004.22	0.130097	-2.94235	3.13156e-07	3.1375e-05	down-regulation
SBSPON	643.848	4717.8	456.879	0.0968417	-3.36823	3.18553e-07	3.18199e-05	down-regulation
FAM46B	568.326	3767.17	421.519	0.111893	-3.15981	3.23476e-07	3.22149e-05	down-regulation
MBNL1-AS1	324.883	3220.97	191.971	0.0596005	-4.06853	3.71086e-07	3.67364e-05	down-regulation
IGSF10	145.18	1215.33	96.0668	0.0790455	-3.66117	3.72796e-07	3.67962e-05	down-regulation
DUSP2	2222.47	10793.5	1829.11	0.169464	-2.56095	4.23274e-07	4.1532e-05	down-regulation
FLNC	6245.04	86551.4	2559.48	0.0295718	-5.07963	4.30085e-07	4.20762e-05	down-regulation
HAND2	215.453	1621.66	150.917	0.0930637	-3.42564	4.48011e-07	4.35737e-05	down-regulation
C20orf166-AS1	42.5692	463.412	23.2552	0.0501824	-4.31667	4.49986e-07	4.36381e-05	down-regulation
COX7A1	341.419	1796.34	274.647	0.152893	-2.70941	4.53525e-07	4.37264e-05	down-regulation
XPNPEP2	97.9747	840.44	63.9002	0.0760318	-3.71725	4.5552e-07	4.37918e-05	down-regulation
AMOTL1	2910.61	10338.2	2569.74	0.248567	-2.00829	4.87206e-07	4.6703e-05	down-regulation
EPHA3	380.121	1967.65	307.263	0.156157	-2.67893	5.01138e-07	4.76267e-05	down-regulation
PID1	226.317	1474.38	169.039	0.114651	-3.12468	5.10762e-07	4.84031e-05	down-regulation
PRICKLE2	680.871	2954.98	576.503	0.195095	-2.35775	5.37263e-07	5.07424e-05	down-regulation
REEP1	257.246	2406.77	158.596	0.0658959	-3.92367	5.38498e-07	5.07424e-05	down-regulation
ACKR1	1053.59	6855.97	787.296	0.114834	-3.12238	5.45998e-07	5.10155e-05	down-regulation
TSPAN2	619.282	2909.92	514.156	0.176691	-2.5007	5.63905e-07	5.25411e-05	down-regulation
ZBTB16	100.593	864.26	65.545	0.0758395	-3.72091	5.89241e-07	5.45959e-05	down-regulation
FAM135B	10.4738	110.924	5.86379	0.0528632	-4.24159	5.98801e-07	5.5194e-05	down-regulation
DCHS1	1001.52	4106	859.046	0.209217	-2.25693	5.99015e-07	5.5194e-05	down-regulation
PLN	686.505	6958.31	398.669	0.0572939	-4.12548	6.02756e-07	5.53853e-05	down-regulation
CCDC80	5063.43	26561.6	4076.8	0.153485	-2.70383	6.12186e-07	5.60968e-05	down-regulation
FGF7	612.153	2953.62	504.694	0.170873	-2.549	6.5961e-07	6.02764e-05	down-regulation
GNAO1	279.776	2194.56	191.9	0.0874433	-3.51551	6.82816e-07	6.22261e-05	down-regulation
CPXM2	1019.93	6147.46	784.608	0.127631	-2.96995	6.85108e-07	6.22643e-05	down-regulation
EML1	695.815	3211.34	580.368	0.180724	-2.46814	7.21542e-07	6.50424e-05	down-regulation
HSPB7	788.612	7156.68	496.357	0.0693557	-3.84984	7.30541e-07	6.56757e-05	down-regulation
MIR4697HG	134.437	1201.44	85.4682	0.0711379	-3.81324	7.41145e-07	6.62707e-05	down-regulation
CTGF	9228.01	58498.5	6966.8	0.119094	-3.06983	7.63343e-07	6.80726e-05	down-regulation
RAI2	336.295	1844.08	267.097	0.144841	-2.78746	7.68408e-07	6.83411e-05	down-regulation
CLIP3	1033.94	6226.76	795.618	0.127774	-2.96833	7.72173e-07	6.84928e-05	down-regulation
DES	37761.3	435318	19516	0.0448315	-4.47934	8.01149e-07	7.08739e-05	down-regulation
FBXL22	171.564	1376.82	116.25	0.084434	-3.56603	8.49861e-07	7.47288e-05	down-regulation
MTURN	1440.34	5375.8	1259.73	0.234334	-2.09336	8.51463e-07	7.47288e-05	down-regulation
TPSB2	544.335	2177.03	469.404	0.215617	-2.21346	8.71959e-07	7.63263e-05	down-regulation
POPDC2	401.684	4086.46	232.575	0.0569136	-4.13508	8.84254e-07	7.71994e-05	down-regulation
RP11-867G23.10	34.7538	372.897	19.2351	0.0515829	-4.27696	9.89213e-07	8.60704e-05	down-regulation
VSTM2A	22.3018	254.788	11.6321	0.0456539	-4.45312	9.9104e-07	8.60704e-05	down-regulation
FZD7	1262.57	4641.05	1107.51	0.238634	-2.06713	1.02481e-06	8.87717e-05	down-regulation
PDE5A	856.198	4182.06	703.561	0.168233	-2.57146	1.05361e-06	9.10291e-05	down-regulation
CPA3	435.69	1894.4	368.745	0.19465	-2.36105	1.15315e-06	9.88585e-05	down-regulation
RP11-805I24.3	19.2871	202.306	10.8877	0.0538179	-4.21577	1.16405e-06	9.95371e-05	down-regulation
GYPC	769.561	2904.51	671.58	0.23122	-2.11266	1.20955e-06	0.000103163	down-regulation
WBSCR17	193.672	1554.81	131.204	0.084386	-3.56685	1.26063e-06	0.000106971	down-regulation
AARD	60.4267	618.141	34.8311	0.0563482	-4.14949	1.27846e-06	0.000107933	down-regulation
RP11-753H16.3	21.4786	233.352	11.7549	0.050374	-4.31118	1.29534e-06	0.00010908	down-regulation
HSPG2	10015.6	38136.1	8725.02	0.228787	-2.12793	1.31112e-06	0.000110131	down-regulation
DPYSL3	6858.3	30836.3	5757.86	0.186723	-2.42103	1.41582e-06	0.000118327	down-regulation
SLC24A3	504.771	2223.72	425.882	0.191518	-2.38445	1.42686e-06	0.000118952	down-regulation
PHYHIP	251.786	1322.4	202.652	0.153246	-2.70608	1.43846e-06	0.000119619	down-regulation
PTGFR	153.283	1213.13	104.643	0.0862584	-3.53519	1.46241e-06	0.000121005	down-regulation
RCAN1	2815.89	14657.1	2272.45	0.155041	-2.68928	1.48773e-06	0.00012265	down-regulation
LIFR	812.449	3176.5	703.954	0.221613	-2.17388	1.48966e-06	0.00012265	down-regulation
FOXP2	258.908	1638.91	195.574	0.119332	-3.06695	1.51042e-06	0.000124052	down-regulation
NBEA	356.827	2012.64	280.836	0.139536	-2.84129	1.83075e-06	0.000149623	down-regulation
LRRC2	44.0239	396.436	27.8505	0.0702521	-3.83132	1.95325e-06	0.000159242	down-regulation
RAMP1	837.479	3650.87	708.362	0.194026	-2.36568	2.02219e-06	0.00016446	down-regulation
GATA5	93.9694	855.736	59.0091	0.0689572	-3.85815	2.12511e-06	0.000172409	down-regulation
MYZAP	487.446	2306.32	403.971	0.175158	-2.51327	2.21618e-06	0.00017936	down-regulation
SHH	1325.88	5848.06	1118.34	0.191232	-2.38661	2.24921e-06	0.000181591	down-regulation
C3orf70	362.36	2089.25	283.106	0.135506	-2.88357	2.42455e-06	0.000194802	down-regulation
FBXL7	371.793	1880.97	302.531	0.160838	-2.63632	2.69069e-06	0.000215664	down-regulation
FAIM2	105.39	817.139	72.7248	0.0889993	-3.49006	2.69728e-06	0.000215672	down-regulation
PTGS2	4154.51	18666.4	3488.51	0.186887	-2.41976	2.86287e-06	0.000226732	down-regulation
NCALD	511.797	2188.92	434.827	0.198649	-2.33171	3.09997e-06	0.000241485	down-regulation
HAND1	45.2227	535.365	22.7283	0.0424538	-4.55796	3.31052e-06	0.000257285	down-regulation
RNF122	527.266	2020.5	458.736	0.22704	-2.13898	3.39036e-06	0.000262876	down-regulation
RAB9B	147.08	1223.69	97.6702	0.0798162	-3.64717	3.44797e-06	0.000266721	down-regulation
ANGPTL7	25.9594	256.804	15.3651	0.0598319	-4.06294	3.60988e-06	0.000278597	down-regulation
SFRP1	900.598	5118.21	707.036	0.138141	-2.85578	3.68888e-06	0.000282726	down-regulation
CSGALNACT1	614.073	2346.65	534.559	0.227797	-2.13418	3.75602e-06	0.000287211	down-regulation
ADAMTS9-AS2	25.1989	243.138	15.1969	0.0625032	-3.99993	3.88557e-06	0.000296435	down-regulation
PRKCB	495.192	2084.32	422.261	0.202589	-2.30337	3.99649e-06	0.000302814	down-regulation
ELN	2400.35	9405.81	2078.85	0.221017	-2.17777	4.02761e-06	0.000303788	down-regulation
DOK6	178.104	1392.02	122.392	0.0879241	-3.5076	4.17098e-06	0.00031389	down-regulation
FGF2	288.384	1593.68	228.479	0.143366	-2.80223	4.22176e-06	0.000316995	down-regulation
OSBPL10	1269.77	4635.66	1115.29	0.24059	-2.05535	4.24731e-06	0.000318194	down-regulation
FGF10	39.3439	372.547	24.052	0.0645611	-3.95319	4.5689e-06	0.000340752	down-regulation
LONRF2	240.399	1552.83	180.166	0.116025	-3.1075	4.6803e-06	0.000348279	down-regulation
ADAMTS8	150.059	959.158	112.927	0.117735	-3.08638	4.79288e-06	0.000355861	down-regulation
PCP4	977.594	10484.8	541.274	0.0516247	-4.2758	4.93516e-06	0.000365609	down-regulation
ATP1A2	526.859	6633.79	246.589	0.0371717	-4.74965	5.13241e-06	0.000378535	down-regulation
MIR27A	4.6746	46.5529	2.75266	0.0591297	-4.07997	5.24841e-06	0.000385382	down-regulation
PCSK7	1365.24	4854.77	1205.1	0.248229	-2.01026	5.28378e-06	0.000387124	down-regulation
TARID	19.3873	178.089	12.1038	0.067965	-3.87906	5.39605e-06	0.000394481	down-regulation
PDE1A	197.444	1200.64	151.404	0.126102	-2.98734	5.45438e-06	0.00039787	down-regulation
BVES	321.19	1848.96	251.075	0.135792	-2.88053	5.67166e-06	0.000412815	down-regulation
CILP	1192.47	8014.37	879.392	0.109727	-3.18801	5.78489e-06	0.000420137	down-regulation
NPY6R	43.2888	588.982	18.2449	0.0309771	-5.01266	5.9163e-06	0.000428745	down-regulation
SOX17	156.754	909.278	122.218	0.134412	-2.89527	6.25813e-06	0.000452531	down-regulation
DNAJB4	890.648	3612.07	765.752	0.211998	-2.23788	6.34145e-06	0.000457561	down-regulation
C16orf45	690.197	2698.38	598.035	0.221628	-2.17379	6.60495e-06	0.000475542	down-regulation
MIR23A	8.31348	75.9452	5.2096	0.0685969	-3.86571	6.79946e-06	0.000487436	down-regulation
ANK2	370.47	2281.77	282.753	0.123918	-3.01254	6.91716e-06	0.000494807	down-regulation
PDE2A	441.274	2310.05	355.509	0.153897	-2.69996	7.22253e-06	0.000514439	down-regulation
SGCG	19.8152	187.757	12.1078	0.0644866	-3.95486	7.37154e-06	0.000523931	down-regulation
SSC5D	782.475	3096.36	676.282	0.218412	-2.19488	7.38996e-06	0.00052412	down-regulation
VEGFD	70.2945	610.165	45.5179	0.0745993	-3.74469	7.88461e-06	0.000558012	down-regulation
ASPA	89.7487	642.478	64.3819	0.100209	-3.31892	7.90876e-06	0.000558533	down-regulation
MMRN1	181.427	1172.19	135.957	0.115986	-3.10797	7.95926e-06	0.000560909	down-regulation
AF001548.3	4.88941	55.1874	2.58105	0.0467688	-4.41831	8.06472e-06	0.000567139	down-regulation
ITGA9	557.487	2382.17	473.745	0.198871	-2.33009	8.3704e-06	0.000583699	down-regulation
MYOC	75.9092	1189.87	24.7854	0.0208304	-5.58517	8.46051e-06	0.000588749	down-regulation
GNG7	224.483	1247.95	177.512	0.142242	-2.81358	9.27098e-06	0.000638469	down-regulation
MORN5	10.9829	146.59	4.75936	0.0324672	-4.94487	9.94037e-06	0.000681745	down-regulation
BNC2	390.855	1848.49	323.959	0.175256	-2.51247	1.08085e-05	0.00073976	down-regulation
THBS1	20344.7	111484	16161.9	0.144971	-2.78616	1.10017e-05	0.000751434	down-regulation
HSD17B6	301.05	1578.47	242.424	0.153582	-2.70292	1.11531e-05	0.000760215	down-regulation
SCN7A	88.7216	791.407	56.4728	0.0713575	-3.80879	1.13671e-05	0.000773219	down-regulation
PGR	78.0571	569.718	55.493	0.0974043	-3.35987	1.17625e-05	0.000798481	down-regulation
PELI2	427.24	1832.91	362.729	0.197897	-2.33718	1.25495e-05	0.000850168	down-regulation
CHRDL1	378.556	2585.02	277.293	0.107269	-3.22069	1.31134e-05	0.000882976	down-regulation
TMEM35A	160.848	1168.11	114.621	0.0981256	-3.34923	1.34555e-05	0.000902359	down-regulation
LMCD1	2004.55	7566.86	1749.27	0.231176	-2.11294	1.3729e-05	0.000917003	down-regulation
IL6	749.973	5886.39	514.244	0.0873616	-3.51686	1.37819e-05	0.000918689	down-regulation
GADD45B	3010.12	15939.9	2416.73	0.151615	-2.72151	1.39992e-05	0.000929454	down-regulation
HHIP	158.296	873.339	125.48	0.143678	-2.79909	1.42183e-05	0.000942118	down-regulation
HIF3A	249.935	1694.57	183.636	0.108367	-3.206	1.42828e-05	0.000944512	down-regulation
EBF1	303.412	1469.94	249.876	0.169991	-2.55647	1.47433e-05	0.000971099	down-regulation
RP11-404E16.1	2.99884	37.5172	1.41467	0.0377072	-4.72902	1.51246e-05	0.000994249	down-regulation
TMEM100	77.2711	516.217	57.1262	0.110663	-3.17576	1.52674e-05	0.00100166	down-regulation
PLCD4	199.835	1206.03	153.657	0.127407	-2.97248	1.57554e-05	0.00103164	down-regulation
RERGL	28.3581	219.741	19.5748	0.0890814	-3.48873	1.59147e-05	0.00104002	down-regulation
SH3BGR	217.401	1312.16	167.158	0.127391	-2.97266	1.62665e-05	0.00106093	down-regulation
PDE4B	536.045	1989.72	469.33	0.235877	-2.08389	1.63204e-05	0.00106236	down-regulation
COLEC12	762.22	2884.37	664.826	0.230493	-2.1172	1.66981e-05	0.0010806	down-regulation
CACNB2	181.699	1208.24	134.587	0.111391	-3.1663	1.70558e-05	0.00110161	down-regulation
RP11-88I18.3	2.64904	32.1164	1.29667	0.040374	-4.63043	1.73421e-05	0.00111576	down-regulation
CH25H	225.505	1599.6	162.443	0.101552	-3.29971	1.76744e-05	0.00113495	down-regulation
FBXO32	3478.63	12530.3	3063.22	0.244464	-2.0323	1.84421e-05	0.00117743	down-regulation
GREM2	104.006	675.351	77.7848	0.115177	-3.11808	1.91677e-05	0.00121907	down-regulation
RP11-180I4.4	2.08449	23.826	1.08669	0.0456092	-4.45453	1.94636e-05	0.00123553	down-regulation
AGTR1	104.393	784.183	73.1946	0.0933387	-3.42138	2.02067e-05	0.00127298	down-regulation
NECAB1	166.223	1136.4	121.698	0.107091	-3.22309	2.03596e-05	0.00127777	down-regulation
EDNRA	616.991	2256.73	541.738	0.240054	-2.05857	2.09518e-05	0.00131247	down-regulation
CACNA2D1	512.377	2340.09	428.496	0.183111	-2.44921	2.24167e-05	0.00139642	down-regulation
NDNF	119.269	741.061	90.7327	0.122436	-3.0299	2.31702e-05	0.00144058	down-regulation
MMP27	1.21691	13.5281	0.651904	0.0481888	-4.37516	2.32183e-05	0.00144088	down-regulation
HDAC4	670.166	2558.62	583.497	0.228052	-2.13257	2.35938e-05	0.00145874	down-regulation
CLCA4	2863.45	12518.4	2420.35	0.193343	-2.37077	2.38864e-05	0.00147409	down-regulation
ADRB3	36.5124	322.637	23.3811	0.0724689	-3.78649	2.40543e-05	0.0014817	down-regulation
ESR1	320.45	1885.37	248.63	0.131874	-2.92277	2.46175e-05	0.00151359	down-regulation
STUM	187.009	1748.05	115.367	0.0659972	-3.92145	2.50289e-05	0.00153322	down-regulation
RP11-1069G10.1	34.2261	432.572	15.9445	0.0368597	-4.76181	2.55161e-05	0.00156019	down-regulation
CCL2	1594.12	11279.7	1149.61	0.101919	-3.29451	2.56522e-05	0.00156563	down-regulation
ADAMTS4	1967.89	11984.2	1508.21	0.12585	-2.99022	2.60652e-05	0.00157925	down-regulation
RP11-358D17.2	10.4931	105.374	6.13865	0.0582559	-4.10145	2.63228e-05	0.00159195	down-regulation
LRFN5	105.651	761.216	75.5648	0.0992686	-3.33252	2.66665e-05	0.00160981	down-regulation
RERG	261.521	1385.22	209.951	0.151565	-2.72199	2.73706e-05	0.00164635	down-regulation
PKDCC	575.198	3076.83	460.389	0.149631	-2.74052	2.75087e-05	0.00165166	down-regulation
MAOB	695.347	4924.09	501.274	0.1018	-3.29618	2.9092e-05	0.00173421	down-regulation
APBB1	671.631	2549.87	585.431	0.229592	-2.12285	3.10723e-05	0.00184564	down-regulation
NXPH3	241.211	1318.79	191.757	0.145404	-2.78186	3.17349e-05	0.00187495	down-regulation
PARD3B	391.358	1742.91	329.331	0.188955	-2.40388	3.22504e-05	0.00190203	down-regulation
RYR2	178.192	1295.04	126.935	0.0980166	-3.35083	3.24156e-05	0.00190839	down-regulation
CPNE6	19.2639	167.296	12.4701	0.0745395	-3.74585	3.2532e-05	0.00191186	down-regulation
AC053503.12	43.6102	515.86	21.9369	0.0425249	-4.55555	3.3284e-05	0.00194916	down-regulation
COL19A1	49.2864	525.795	27.4176	0.052145	-4.26133	3.46728e-05	0.00202337	down-regulation
KLHL30-AS1	5.22998	56.7271	2.86659	0.0505329	-4.30663	3.56807e-05	0.00207491	down-regulation
STARD13	664.23	2356.33	586.573	0.248934	-2.00616	3.67447e-05	0.00213305	down-regulation
LMOD3	19.2574	181.178	11.8263	0.0652745	-3.93734	3.6835e-05	0.00213457	down-regulation
CARMN	195.619	1476.45	136.837	0.0926803	-3.43159	3.69908e-05	0.00213987	down-regulation
CAMK2A	47.4031	413.051	30.6222	0.0741365	-3.75367	3.87596e-05	0.00223442	down-regulation
GUCA1C	7.49985	145.81	1.15229	0.00790267	-6.98344	3.901e-05	0.00224496	down-regulation
FAT4	306.011	1423.49	254.726	0.178945	-2.48241	4.15951e-05	0.0023732	down-regulation
VIPR2	30.6939	239.615	21.1057	0.0880816	-3.50502	4.25472e-05	0.00241922	down-regulation
CMTM5	7.41655	66.4626	4.7067	0.0708173	-3.81975	4.34903e-05	0.00246443	down-regulation
CAP2	491.457	2041.92	420.301	0.205836	-2.28043	4.6935e-05	0.0026461	down-regulation
RASGRP2	317.307	1419.49	266.724	0.187902	-2.41195	4.72696e-05	0.00266045	down-regulation
BOC	636.341	3031.6	526.414	0.173642	-2.52581	4.76531e-05	0.00267751	down-regulation
ABCC9	277.244	1344.06	228.284	0.169847	-2.5577	4.84075e-05	0.00270618	down-regulation
LINC00865	333.956	1468.59	281.883	0.191941	-2.38126	5.18099e-05	0.00285797	down-regulation
PPP1R1A	73.8436	526.321	53.0778	0.100847	-3.30976	5.25784e-05	0.00289077	down-regulation
CD300LG	18.9126	143.521	13.1939	0.0919301	-3.44332	5.53274e-05	0.00301204	down-regulation
PGM5P4-AS1	2.70081	29.2339	1.4831	0.0507323	-4.30095	5.60844e-05	0.00304826	down-regulation
ELANE	6.74957	57.3925	4.42537	0.0771072	-3.69699	5.70722e-05	0.00309689	down-regulation
RXRG	13.394	106.303	9.13005	0.0858868	-3.54142	5.72943e-05	0.00310387	down-regulation
TTLL7	439.879	1885.27	373.544	0.198138	-2.33542	5.75328e-05	0.00311173	down-regulation
CCL14	55.5301	377.667	40.746	0.107889	-3.21239	5.83746e-05	0.00313686	down-regulation
FAM189A2	169.87	942.258	134.423	0.14266	-2.80935	5.87912e-05	0.00315415	down-regulation
BCHE	171.983	1251.86	122.424	0.0977931	-3.35412	5.9318e-05	0.00317729	down-regulation
RBMS3	398.785	1627.06	342.415	0.210451	-2.24845	5.97657e-05	0.00319612	down-regulation
DGKB	39.3826	371.218	24.1535	0.0650656	-3.94196	6.00891e-05	0.00320311	down-regulation
TBX4	161.795	1034.68	121.735	0.117655	-3.08737	6.0406e-05	0.00321486	down-regulation
PTGDS	2142.11	9283.67	1814.35	0.195435	-2.35524	6.67691e-05	0.00353091	down-regulation
LRRN4CL	153.231	830.145	122.165	0.147161	-2.76454	6.74524e-05	0.00356138	down-regulation
DYNC1I1	385.633	1765.21	322.319	0.182595	-2.45328	6.81929e-05	0.00358908	down-regulation
RASA3-IT1	1.65889	16.3439	0.984935	0.060263	-4.05258	6.95327e-05	0.00363663	down-regulation
CPEB1	61.4425	474.008	42.5084	0.0896787	-3.47909	6.95336e-05	0.00363663	down-regulation
RP11-613D13.8	15.6114	112.078	11.1843	0.0997903	-3.32496	6.99608e-05	0.0036475	down-regulation
HEPH	781.091	2872.69	685.1	0.238487	-2.06802	7.07897e-05	0.00367918	down-regulation
LEPR	403.358	1547.84	350.834	0.22666	-2.1414	7.1903e-05	0.00372889	down-regulation
STARD9	327.522	1429.89	276.93	0.193672	-2.36831	7.19703e-05	0.00372889	down-regulation
MKX-AS1	2.55452	29.5169	1.31712	0.0446225	-4.48609	7.74658e-05	0.00396749	down-regulation
PRIMA1	96.3928	661.717	70.448	0.106462	-3.23158	7.75296e-05	0.00396749	down-regulation
CTSG	155.987	925.293	120.681	0.130424	-2.93872	7.93111e-05	0.00404001	down-regulation
NCAM1	757.629	6295.39	503.481	0.0799762	-3.64429	8.16589e-05	0.00415324	down-regulation
ARHGAP20	92.9876	657.094	67.0986	0.102114	-3.29174	8.45762e-05	0.00427547	down-regulation
EPM2A	250.599	1334.97	200.833	0.150441	-2.73273	8.81594e-05	0.0044431	down-regulation
CNTN1	880.178	5842.68	652.43	0.111666	-3.16274	9.01638e-05	0.00453724	down-regulation
RASL11A	369.083	1510.55	316.697	0.209656	-2.2539	9.03871e-05	0.00453735	down-regulation
GDF10	14.2292	110.505	9.81071	0.0887809	-3.49361	9.24632e-05	0.00462591	down-regulation
OLFML1	264.923	1102.22	226.496	0.205491	-2.28285	9.88902e-05	0.00488764	down-regulation
ZFPM2	221.091	1213.26	175.556	0.144697	-2.78889	0.000100655	0.00496071	down-regulation
IGSF9B	51.2371	413.304	34.6205	0.0837654	-3.5775	0.00010202	0.00501253	down-regulation
CSF3	541.364	4194.33	373.716	0.0891003	-3.48843	0.00010297	0.00504433	down-regulation
HAAO	265.042	1125.87	225.535	0.200322	-2.31961	0.00010575	0.00517288	down-regulation
ASTL	28.237	182.667	21.1496	0.115782	-3.11051	0.00010926	0.00531333	down-regulation
C5orf66-AS1	37.9542	262.731	27.6384	0.105196	-3.24884	0.000115055	0.00557883	down-regulation
DAAM2	398.801	1706.55	338.783	0.198519	-2.33265	0.000116532	0.0056422	down-regulation
RP11-243M5.5	1.21792	12.9434	0.679794	0.0525205	-4.25098	0.000125906	0.00603459	down-regulation
JAZF1	517.742	1943.12	452.326	0.232783	-2.10294	0.000126795	0.00606846	down-regulation
ACTN2	92.3993	1101.85	46.0718	0.0418131	-4.5799	0.000128594	0.00613693	down-regulation
KB-1448A5.1	1.77175	17.5902	1.04578	0.0594523	-4.07212	0.00013346	0.00634184	down-regulation
ADGRB3	47.6891	336.468	34.436	0.102346	-3.28848	0.000133799	0.00634887	down-regulation
METTL24	21.5724	186.58	13.9996	0.0750328	-3.73634	0.00013503	0.00638903	down-regulation
RP11-535A5.1	2.82027	27.1125	1.70542	0.0629016	-3.99076	0.000135428	0.00639878	down-regulation
PLA2G5	116.595	789.884	85.6954	0.108491	-3.20435	0.000136981	0.0064538	down-regulation
RP11-498E2.9	10.1284	91.4548	6.39607	0.0699369	-3.8378	0.000140373	0.00660428	down-regulation
KCNA5	28.3373	204.692	20.2437	0.098898	-3.33792	0.00014125	0.00663614	down-regulation
GPIHBP1	93.007	532.848	72.8211	0.136664	-2.8713	0.000142367	0.00666981	down-regulation
XKR4	20.5394	169.926	13.6835	0.0805262	-3.6344	0.000144924	0.00677054	down-regulation
KLF17	15.6261	134.986	10.1482	0.0751798	-3.73351	0.000146354	0.00681816	down-regulation
RP11-389G6.3	6.98872	62.5918	4.43689	0.0708861	-3.81835	0.000147323	0.00685374	down-regulation
TNFAIP8L3	226.644	1071.27	187.881	0.175381	-2.51143	0.000150497	0.00698186	down-regulation
PCDH18	445.154	1621.77	391.155	0.241191	-2.05175	0.000151595	0.00702297	down-regulation
CMA1	51.6175	356.729	37.6148	0.105444	-3.24545	0.000153288	0.00709153	down-regulation
TSHZ3	542.659	2065.6	472.766	0.228875	-2.12737	0.000155427	0.0071805	down-regulation
C1QTNF9	5.76948	46.7785	3.88742	0.0831027	-3.58896	0.000155925	0.00719352	down-regulation
MICU3	65.8142	465.622	47.4655	0.10194	-3.29421	0.000162486	0.00743024	down-regulation
AC002398.12	6.75136	58.3713	4.38233	0.0750768	-3.73549	0.00016256	0.00743024	down-regulation
TRIM63	59.8026	442.441	42.2419	0.0954747	-3.38874	0.000163167	0.00744501	down-regulation
ABCB5	10.1951	86.6625	6.68573	0.0771468	-3.69625	0.000166204	0.00754219	down-regulation
LINC00891	4.6644	44.7018	2.82693	0.0632398	-3.98302	0.000166952	0.00756584	down-regulation
CACNB4	129.955	738.612	102.022	0.138126	-2.85594	0.000183392	0.00826582	down-regulation
ACTA2-AS1	111.768	664.639	86.3951	0.129988	-2.94355	0.000188046	0.00844125	down-regulation
FBXL21	4.45974	39.56	2.84886	0.0720135	-3.79559	0.000197416	0.00882601	down-regulation
KCNE4	468.741	3856.03	313.286	0.0812459	-3.62156	0.000197678	0.00882601	down-regulation
RP11-514D23.2	2.83656	25.2893	1.80612	0.0714185	-3.80756	0.000199118	0.00887812	down-regulation
DENND2A	442.867	1635.71	388.123	0.237281	-2.07533	0.000199379	0.00887812	down-regulation
SETBP1	525.983	1983.62	459.087	0.23144	-2.11129	0.000204073	0.00907499	down-regulation
KCNK3	209.875	1124.94	167.88	0.149234	-2.74435	0.000206693	0.0091792	down-regulation
LINC01154	1.359	14.3728	0.76175	0.0529996	-4.23788	0.000207892	0.00922013	down-regulation
RP11-1100L3.8	47.3911	277.15	36.8467	0.132949	-2.91106	0.000216064	0.00955029	down-regulation
LGI4	234.701	953.214	201.725	0.211626	-2.24041	0.00022224	0.00976534	down-regulation
LRRK2	225.336	1040.77	187.912	0.180551	-2.46952	0.000229549	0.0100072	down-regulation
OLFM1	270.587	1135.49	230.894	0.203342	-2.29802	0.000232751	0.0101335	down-regulation
PLSCR4	447.273	1605.17	394.133	0.24554	-2.02597	0.000234507	0.0101966	down-regulation
RP11-371M22.1	1.92687	24.1172	0.908475	0.0376693	-4.73047	0.00024076	0.0104412	down-regulation
SRL	36.3347	239.448	27.0131	0.112814	-3.14799	0.000241362	0.0104537	down-regulation
P2RY14	87.2219	575.91	64.7942	0.112508	-3.1519	0.000243318	0.0105247	down-regulation
AC093390.1	3.18684	30.4311	1.9365	0.0636358	-3.97402	0.000245596	0.0106094	down-regulation
RYR3	94.4549	583.59	72.0067	0.123386	-3.01875	0.000249824	0.0107781	down-regulation
RP11-243M5.2	2.10404	20.1058	1.27787	0.0635575	-3.97579	0.000253508	0.0109087	down-regulation
ARHGAP6	377.482	1399.74	330.567	0.236163	-2.08214	0.000265893	0.011339	down-regulation
ARHGEF37	552.792	1971.5	487.682	0.247365	-2.01529	0.000272958	0.0115529	down-regulation
BDKRB1	156.713	765.123	128.79	0.168326	-2.57067	0.000272993	0.0115529	down-regulation
ILK	482.122	1840.89	419.763	0.228021	-2.13276	0.000281012	0.0118171	down-regulation
MAGI2-AS3	335.153	1326.54	289.654	0.218352	-2.19527	0.00028206	0.0118462	down-regulation
OMD	83.4289	513.453	63.6935	0.124049	-3.01102	0.000292356	0.012243	down-regulation
SCN11A	134.977	1481.64	73.1732	0.0493864	-4.33974	0.000295083	0.0123308	down-regulation
MFAP5	783.887	3754.61	647.549	0.172468	-2.5356	0.000299754	0.0124856	down-regulation
AC053503.6	16.0571	125.254	11.0456	0.0881858	-3.50331	0.000299914	0.0124856	down-regulation
RP11-93G5.1	7.62011	61.853	5.13116	0.0829572	-3.59149	0.000307334	0.0127786	down-regulation
NRXN1	53.5956	440.113	35.8569	0.0814718	-3.61755	0.000312795	0.0129877	down-regulation
RP5-1125N11.2	5.99992	53.7822	3.80701	0.0707857	-3.8204	0.000313146	0.0129877	down-regulation
PART1	169.26	907.571	135.376	0.149163	-2.74504	0.000315403	0.0130651	down-regulation
SERTM1	6.48307	62.2936	3.92172	0.0629554	-3.98953	0.000320185	0.0132302	down-regulation
KIAA0408	3.87347	37.7921	2.31682	0.0613043	-4.02787	0.00032498	0.0133773	down-regulation
FXYD1	30.6361	195.776	23.0573	0.117774	-3.08591	0.000335363	0.0137549	down-regulation
DCLK1	269.392	1228.79	225.361	0.183401	-2.44693	0.000361555	0.0147563	down-regulation
ODF3L1	26.8697	159.168	20.7981	0.130668	-2.93603	0.000374445	0.0152078	down-regulation
RP11-814P5.1	1.27465	12.5253	0.758312	0.0605422	-4.04592	0.000378627	0.0153401	down-regulation
MIR221	6.47313	46.6282	4.63027	0.0993019	-3.33204	0.000383106	0.0154464	down-regulation
KRT13	78512.4	316550	67588	0.213514	-2.2276	0.000404212	0.0161797	down-regulation
CDH19	88.1031	510.866	68.701	0.13448	-2.89454	0.000421691	0.0167583	down-regulation
MAPT	249.947	1347.46	199.578	0.148114	-2.75522	0.000446856	0.0175487	down-regulation
CXCL2	474.6	1940.63	407.319	0.20989	-2.2523	0.000457265	0.0178941	down-regulation
FGFR1	2489.76	9570.64	2164.79	0.226191	-2.14439	0.00046169	0.0180084	down-regulation
ACOX2	121.717	646.202	97.6464	0.151108	-2.72635	0.000466678	0.0181769	down-regulation
CRYAB	1559.72	13606.3	1006.86	0.0739996	-3.75634	0.000471463	0.0183204	down-regulation
ADCYAP1	57.5773	320.551	45.5084	0.14197	-2.81635	0.000477753	0.0185	down-regulation
RECK	330.894	1223.68	289.921	0.236925	-2.0775	0.000503566	0.0194317	down-regulation
ROR1	164.246	858.436	132.387	0.154219	-2.69695	0.000514957	0.0198386	down-regulation
SEMA3E	193.14	878.548	161.684	0.184036	-2.44194	0.000531806	0.020375	down-regulation
RPL7P3	1.32207	13.4698	0.764568	0.0567616	-4.13894	0.000532298	0.020375	down-regulation
CDON	254.412	1047.87	217.997	0.20804	-2.26507	0.000542068	0.0206914	down-regulation
PRKAA2	186.876	1020.21	148.631	0.145686	-2.77907	0.000542783	0.0206914	down-regulation
HSPA2	1244.8	4580.1	1091.73	0.238364	-2.06876	0.000551223	0.0209547	down-regulation
SMPX	28.1082	208.863	19.8127	0.0948596	-3.39806	0.000566163	0.0214491	down-regulation
TNNT2	329.724	2118.45	247.633	0.116894	-3.09673	0.000568702	0.0215207	down-regulation
CRNN	1955.61	42185.2	109.33	0.00259168	-8.5919	0.000582264	0.0220089	down-regulation
TMPRSS11B	70.2342	1489.31	5.10751	0.00342944	-8.18781	0.000601776	0.0225415	down-regulation
RGS22	17.2086	115.528	12.6964	0.109899	-3.18575	0.000607231	0.0227203	down-regulation
RP11-574O7.1	1.22158	10.6899	0.787047	0.0736252	-3.76366	0.000612529	0.0228414	down-regulation
TBX5	106.069	655.39	80.8586	0.123375	-3.01888	0.000613933	0.0228682	down-regulation
CKB	5224.6	23191.1	4400.05	0.18973	-2.39798	0.000623936	0.0231888	down-regulation
RND1	239.884	895.498	209.795	0.234278	-2.09371	0.000629673	0.0233759	down-regulation
SCUBE1	100.122	497.104	81.9027	0.16476	-2.60156	0.000641805	0.0237145	down-regulation
LINC00702	135.313	1075.92	92.1454	0.0856437	-3.54551	0.000642359	0.0237145	down-regulation
INMT	228.74	912.21	197.373	0.216368	-2.20844	0.00065761	0.0241703	down-regulation
CRYM	214.283	981.892	179.054	0.182356	-2.45517	0.000666869	0.0244565	down-regulation
DCHS2	34.0825	226.219	25.2646	0.111682	-3.16253	0.000671549	0.024574	down-regulation
ANKS1B	39.0058	280.825	27.9078	0.0993779	-3.33093	0.000707715	0.0257565	down-regulation
AC007392.4	1.39071	14.0262	0.810827	0.0578082	-4.11258	0.000707737	0.0257565	down-regulation
GSTM5	286.602	1175.7	245.798	0.209065	-2.25797	0.000726752	0.026316	down-regulation
SFRP5	18.4095	110.55	14.1808	0.128275	-2.96268	0.000727859	0.026316	down-regulation
C2CD4B	117.928	570.637	97.1519	0.170252	-2.55426	0.000729814	0.0263581	down-regulation
HMGCLL1	13.18	83.3527	9.9595	0.119486	-3.06508	0.000756678	0.0272101	down-regulation
RP11-475B2.1	1.93287	17.2117	1.23167	0.0715601	-3.8047	0.000759913	0.027297	down-regulation
CTD-2270F17.1	1.73872	15.8255	1.09222	0.0690167	-3.85691	0.000763873	0.0274096	down-regulation
RP11-64B16.2	53.5569	343.941	40.2301	0.116968	-3.09581	0.000779428	0.0278405	down-regulation
ENPP6	28.999	161.255	22.9293	0.142193	-2.81408	0.000780068	0.0278405	down-regulation
GALNT15	236.237	1279.09	188.377	0.147275	-2.76342	0.000794238	0.0282856	down-regulation
STON1-GTF2A1L	8.24576	65.9893	5.59569	0.0847969	-3.55984	0.000812247	0.0288652	down-regulation
MITF	373.343	1370.36	327.586	0.239051	-2.06461	0.000813761	0.0288881	down-regulation
TCEAL2	86.2351	613.903	62.0185	0.101023	-3.30724	0.000819821	0.0290722	down-regulation
OSTN	17.3398	237.609	7.23083	0.0304317	-5.03828	0.000842519	0.0296872	down-regulation
MEF2C-AS1	14.7147	102.54	10.6841	0.104194	-3.26265	0.000848092	0.0298143	down-regulation
CNGA3	9.19694	88.3246	5.56547	0.0630116	-3.98824	0.000852686	0.0298766	down-regulation
CTD-2006M22.2	20.1398	146.228	14.3532	0.0981565	-3.34877	0.000853284	0.0298766	down-regulation
WISP2	437.524	1984.56	366.525	0.184688	-2.43684	0.000905449	0.0313402	down-regulation
IL13	4.57721	30.5278	3.38624	0.110923	-3.17236	0.000914854	0.0316328	down-regulation
LCN6	12.3296	71.4907	9.61443	0.134485	-2.89448	0.000971593	0.0334556	down-regulation
TPSG1	12.5582	87.8264	9.10385	0.103657	-3.27011	0.000973792	0.0334886	down-regulation
MKX	77.31	534.847	56.3119	0.105286	-3.24762	0.00100754	0.0343378	down-regulation
SCN4B	168.181	703.695	143.604	0.204072	-2.29285	0.00102565	0.034848	down-regulation
KY	14.0257	103.285	9.92924	0.0961342	-3.37881	0.00103426	0.035033	down-regulation
RP11-863P13.4	6.47693	47.0947	4.61283	0.097948	-3.35184	0.0010428	0.0352507	down-regulation
LGI1	6.3858	44.5338	4.63505	0.104079	-3.26424	0.00105733	0.0356692	down-regulation
PTGER3	228.187	947.9	195.157	0.205883	-2.2801	0.00108901	0.0366636	down-regulation
MEOX1	137.08	592.522	116.178	0.196073	-2.35054	0.00109222	0.0367008	down-regulation
ARHGEF26	422.656	1495.05	373.44	0.249785	-2.00124	0.00109675	0.0367753	down-regulation
AC011239.2	5.33511	36.5797	3.90118	0.106649	-3.22906	0.00110161	0.0368641	down-regulation
PRRG3	35.8882	210.246	27.8863	0.132637	-2.91445	0.00110559	0.0369533	down-regulation
NOVA1	102.266	542.289	82.0718	0.151343	-2.7241	0.00110719	0.0369533	down-regulation
RUNX1T1	148.782	771.631	120.197	0.155769	-2.68252	0.00111438	0.0371418	down-regulation
SHISA6	36.7309	209.57	28.7987	0.137418	-2.86335	0.00113897	0.0377722	down-regulation
RP11-254F19.2	1.86503	13.9716	1.30942	0.0937202	-3.4155	0.00114442	0.0378774	down-regulation
PITX2	369.246	1391.55	322.328	0.231633	-2.11009	0.00120274	0.0396498	down-regulation
GHR	145.269	669.136	121.227	0.18117	-2.46459	0.00120632	0.0397287	down-regulation
RP11-473E2.4	2.08386	14.6949	1.50509	0.102422	-3.2874	0.00121562	0.0399261	down-regulation
ADRA1D	25.3663	132.532	20.448	0.154288	-2.6963	0.0012165	0.0399261	down-regulation
PMP2	18.9874	144.334	13.2347	0.0916948	-3.44702	0.0012344	0.0403337	down-regulation
LMX1A	2.73911	22.5509	1.82987	0.0811441	-3.62337	0.0012501	0.040687	down-regulation
LINC00641	285.996	1121.53	247.65	0.220814	-2.1791	0.00125935	0.0409478	down-regulation
FGF10-AS1	1.37477	11.9426	0.889778	0.0745047	-3.74653	0.00129177	0.0417167	down-regulation
RP11-441F2.5	1.88682	18.6172	1.119	0.0601056	-4.05636	0.00129697	0.0418035	down-regulation
SCRG1	114.122	614.726	91.1479	0.148274	-2.75366	0.00130632	0.0420234	down-regulation
GPM6A	32.0316	197.025	24.4594	0.124144	-3.00992	0.00131548	0.0421588	down-regulation
ZFHX4	360.16	1364.86	314.051	0.230097	-2.11968	0.00135669	0.0432256	down-regulation
KLHL13	247.242	996.874	212.839	0.213506	-2.22765	0.00137107	0.0436004	down-regulation
MYOM2	73.1883	396.156	58.3661	0.147331	-2.76287	0.00141228	0.0446123	down-regulation
CXCR2	130.07	627.632	107.235	0.170856	-2.54914	0.00144751	0.0455091	down-regulation
DCAF12L1	2.75119	23.4263	1.80234	0.0769366	-3.70019	0.00151367	0.0474099	down-regulation
RNF180	113.649	577.599	92.3567	0.159897	-2.64478	0.00154168	0.0482416	down-regulation
PDZD4	193.242	1043.63	154.215	0.147767	-2.75861	0.00156565	0.0489456	down-regulation
RSPO2	50.1906	262.227	40.4595	0.154291	-2.69627	0.00158609	0.0493011	down-regulation
NLGN1	73.328	466.754	55.2722	0.118418	-3.07804	0.00158844	0.0493011	down-regulation
ATP1B2	89.2492	423.645	73.9025	0.174445	-2.51916	0.00158896	0.0493011	down-regulation
MT1JP	2.66623	18.1703	1.95469	0.107576	-3.21657	0.00160981	0.0498112	down-regulation
MYH3	332.987	2166.73	248.83	0.114841	-3.12229	0.00161571	0.0499472	down-regulation
MYBL2	4857.44	940.167	5037.22	5.35779	2.42164	1.27207e-07	1.43434e-05	up-regulation
COL10A1	1165.25	10.7872	1218.24	112.933	6.81933	1.63584e-07	1.78403e-05	up-regulation
TPX2	5299.63	1064.75	5493.98	5.15988	2.36734	1.85095e-07	1.96077e-05	up-regulation
UBE2C	3945.91	678.932	4095.84	6.03277	2.59282	1.86958e-07	1.97421e-05	up-regulation
ESM1	704.838	32.562	735.692	22.5936	4.49784	2.69221e-07	2.75541e-05	up-regulation
GRIN2D	1185.06	100.402	1234.84	12.2989	3.62046	3.24801e-07	3.22504e-05	up-regulation
CDC20	3931.99	769.729	4077.12	5.29682	2.40513	8.3727e-07	7.38729e-05	up-regulation
TOP2A	8299.67	2102.33	8584.09	4.08312	2.02967	1.06797e-06	9.20309e-05	up-regulation
PYCR1	2705.65	435.169	2809.85	6.45692	2.69085	1.45333e-06	0.000120554	up-regulation
CDKN2A	2918.08	187.496	3043.39	16.2318	4.02075	3.05794e-06	0.000238822	up-regulation
CDK1	2708.54	574.949	2806.46	4.88123	2.28724	3.63453e-06	0.00027985	up-regulation
TMEM132A	4102.65	922.863	4248.58	4.6037	2.20279	3.64991e-06	0.000280385	up-regulation
KIF18B	1229.11	180.787	1277.22	7.06477	2.82064	3.92958e-06	0.000298424	up-regulation
IQGAP3	2072.1	458.202	2146.16	4.68388	2.2277	5.21023e-06	0.000383425	up-regulation
TROAP	1389.74	235.532	1442.71	6.12534	2.61479	8.18532e-06	0.000573196	up-regulation
FOXM1	2838.96	709.392	2936.7	4.13974	2.04954	8.73333e-06	0.000606465	up-regulation
KIF2C	2209.18	453.769	2289.74	5.04604	2.33515	9.09807e-06	0.000627861	up-regulation
MMP11	8353.8	208.172	8727.63	41.9251	5.38974	1.29797e-05	0.000875748	up-regulation
ETV4	1827.67	321.596	1896.78	5.89804	2.56024	1.31794e-05	0.000885626	up-regulation
PLK1	2436.02	543.212	2522.89	4.64439	2.21549	1.39299e-05	0.0009267	up-regulation
ZWINT	2337.84	534.226	2420.61	4.53107	2.17985	1.46043e-05	0.000963853	up-regulation
NXPH4	469.002	35.909	488.878	13.6144	3.76706	1.97764e-05	0.00125061	up-regulation
SAPCD2	1485.58	279.533	1540.93	5.51252	2.46271	2.2418e-05	0.00139642	up-regulation
C1QTNF6	2826.33	515.407	2932.39	5.68946	2.50829	2.33737e-05	0.00144782	up-regulation
MEX3A	2044.12	361.188	2121.36	5.87329	2.55417	2.47725e-05	0.00152031	up-regulation
AURKA	1579.44	324.012	1637.05	5.05245	2.33698	2.80419e-05	0.00167762	up-regulation
SPAG5	2457.5	600.792	2542.71	4.23226	2.08143	3.17336e-05	0.00187495	up-regulation
CELSR3	1200.1	202.023	1245.91	6.16715	2.6246	3.53812e-05	0.0020611	up-regulation
NUF2	1099.32	196.801	1140.74	5.7964	2.53516	4.07079e-05	0.00232657	up-regulation
MELK	1417.57	285.926	1469.5	5.13945	2.36161	4.25013e-05	0.00241922	up-regulation
CDCA8	1510.37	316.043	1565.18	4.95243	2.30814	4.27537e-05	0.00242682	up-regulation
KIF26B	1127.87	175.375	1171.59	6.68045	2.73995	4.78534e-05	0.00268304	up-regulation
COL7A1	11699.5	2420.56	12125.3	5.00931	2.32461	4.79129e-05	0.00268304	up-regulation
HJURP	1136.87	211.719	1179.33	5.57029	2.47775	5.1571e-05	0.00284951	up-regulation
RECQL4	2280.12	550.211	2359.51	4.28837	2.10043	5.27503e-05	0.00289543	up-regulation
KIFC1	2263.24	577.139	2340.62	4.05556	2.0199	5.39158e-05	0.00294967	up-regulation
ASPM	1510	334.423	1563.95	4.67657	2.22545	5.47946e-05	0.00299283	up-regulation
KIF4A	1476.36	317.605	1529.54	4.81585	2.26779	5.8117e-05	0.00313049	up-regulation
IGF2BP3	320.787	16.2298	334.764	20.6265	4.36643	5.99986e-05	0.00320311	up-regulation
LIPG	1413.65	241.738	1467.44	6.07036	2.60178	6.31563e-05	0.00335586	up-regulation
UHRF1	1271.79	246.981	1318.83	5.33978	2.41678	6.87035e-05	0.00361024	up-regulation
SLC1A6	1852.09	22.036	1936.08	87.8599	6.45713	6.91217e-05	0.00362649	up-regulation
AURKB	1626.29	377.568	1683.6	4.45906	2.15674	7.01352e-05	0.00365087	up-regulation
IGSF9	2688.04	634.441	2782.29	4.38542	2.13272	7.34477e-05	0.00378187	up-regulation
CTA-384D8.31	407.589	22.3525	425.268	19.0255	4.24986	9.04387e-05	0.00453735	up-regulation
TNNT1	554.972	29.2689	579.099	19.7855	4.30637	9.65999e-05	0.00479583	up-regulation
CDT1	1721.33	417.082	1781.19	4.2706	2.09444	9.80855e-05	0.00485509	up-regulation
FAR2P1	228.898	4.29399	239.206	55.7072	5.79979	0.000106832	0.00521048	up-regulation
CCNB2	1961.74	499.578	2028.84	4.06111	2.02187	0.000124901	0.00600374	up-regulation
INHBA	1937.78	389.935	2008.82	5.15168	2.36504	0.000125252	0.00601191	up-regulation
ASF1B	1771.62	440.116	1832.72	4.16419	2.05803	0.000128855	0.00614054	up-regulation
KLHDC7B	5344.69	405.16	5571.39	13.7511	3.78147	0.000131369	0.00625139	up-regulation
PLAU	9839.04	2343.6	10183	4.34504	2.11937	0.000150211	0.00697831	up-regulation
TRIP13	1497.4	366.287	1549.32	4.22979	2.08059	0.000156971	0.00722467	up-regulation
PODXL2	2454.5	595.729	2539.81	4.26336	2.09199	0.000160461	0.0073721	up-regulation
CBX2	1216.93	298.679	1259.07	4.21545	2.07569	0.00016262	0.00743024	up-regulation
CDC6	1798.71	464.25	1859.95	4.00636	2.00229	0.000187085	0.00840946	up-regulation
CDCA3	1249.72	295.793	1293.5	4.37301	2.12863	0.00019031	0.00851989	up-regulation
GTSE1	909.593	183.419	942.92	5.14079	2.36199	0.000216197	0.00955029	up-regulation
PRSS8	4492.74	1112.87	4647.86	4.17646	2.06228	0.000224369	0.00983293	up-regulation
CCNE1	1290.76	288.971	1336.73	4.62583	2.20971	0.000254929	0.0109416	up-regulation
CA9	1540.2	136.38	1604.63	11.7658	3.55653	0.000264676	0.0113161	up-regulation
TTK	966.004	215.311	1000.46	4.64657	2.21617	0.000270203	0.011508	up-regulation
PRR36	684.938	95.0527	712.01	7.49069	2.9051	0.000275854	0.0116591	up-regulation
NEK2	972.229	208.944	1007.26	4.82072	2.26925	0.000276767	0.0116829	up-regulation
B4GALNT4	863.056	135.912	896.427	6.59564	2.72151	0.000277832	0.0116981	up-regulation
IGF2BP2	1380.79	286.222	1431.03	4.99971	2.32185	0.000325355	0.0133773	up-regulation
PFKFB4	1005	202.632	1041.82	5.14146	2.36218	0.000367898	0.0149785	up-regulation
NCAPH	1093.41	256.422	1131.82	4.4139	2.14206	0.000370903	0.0150823	up-regulation
RAC3	720.817	109.995	748.85	6.80806	2.76724	0.000382717	0.0154464	up-regulation
RHPN1	1935.81	464.856	2003.31	4.30953	2.10753	0.00038458	0.0154765	up-regulation
DLGAP5	1235.02	315.774	1277.21	4.04469	2.01603	0.000410713	0.0164004	up-regulation
CDH3	8977.56	1397.68	9325.43	6.67208	2.73814	0.00044492	0.0175112	up-regulation
CKAP2L	845.827	197.75	875.569	4.42765	2.14654	0.00046181	0.0180084	up-regulation
CDC45	1019.61	238.734	1055.45	4.42103	2.14438	0.000515305	0.0198386	up-regulation
HIST3H2A	899.425	172.567	932.783	5.40533	2.43438	0.000588016	0.0221508	up-regulation
CENPA	541.862	93.0809	562.459	6.04269	2.59519	0.000640211	0.0237142	up-regulation
COL11A1	1800.62	34.3935	1881.68	54.7103	5.77374	0.000772157	0.0276472	up-regulation
ACKR2	636.726	104.796	661.139	6.30883	2.65737	0.000820717	0.029073	up-regulation
HIST1H1C	3809.81	699.39	3952.56	5.65144	2.49862	0.000827687	0.0292887	up-regulation
HIST1H2BD	1012.53	202.478	1049.71	5.18433	2.37416	0.000838792	0.0296186	up-regulation
HMMR	959.257	245.554	992.011	4.0399	2.01432	0.000845823	0.0297721	up-regulation
IFI6	14367.1	2450.65	14913.9	6.08572	2.60543	0.000852825	0.0298766	up-regulation
POLQ	667.98	138.173	692.295	5.01033	2.32491	0.000873116	0.0304136	up-regulation
RHBG	641.685	76.3166	667.632	8.74819	3.12898	0.000893401	0.03102	up-regulation
FANCA	1053.89	258.7	1090.38	4.21485	2.07548	0.000929289	0.0320321	up-regulation
SLC12A8	975.072	249.843	1008.36	4.03595	2.01291	0.000994866	0.0340105	up-regulation
IER5L	1359.23	340.464	1405.99	4.12962	2.04601	0.00100288	0.0342455	up-regulation
AC016735.2	644.696	117.143	668.907	5.71016	2.51353	0.00101095	0.0344188	up-regulation
FAM111B	791.333	183.127	819.245	4.47364	2.16145	0.00103111	0.0349976	up-regulation
IFI27	16635.6	4067.99	17212.4	4.23118	2.08106	0.0010468	0.0353501	up-regulation
SBK1	1112.61	183.14	1155.27	6.30811	2.65721	0.00108285	0.0364932	up-regulation
STIL	784.731	180.982	812.44	4.48907	2.16642	0.00126899	0.041181	up-regulation
GPRIN1	481.288	76.3645	499.871	6.54587	2.71058	0.0012761	0.0413311	up-regulation
MAGEA6	729.202	108.679	757.681	6.97172	2.80151	0.0013355	0.0427142	up-regulation
AC006262.5	408.112	27.4296	425.583	15.5155	3.95564	0.00136793	0.0435419	up-regulation
C21orf58	581.496	110.611	603.107	5.45252	2.44692	0.00137772	0.0437282	up-regulation
PAQR4	808.513	194.828	836.677	4.29443	2.10247	0.00158115	0.0492979	up-regulation
FAM64A	636.851	152.291	659.089	4.32782	2.11364	0.00159036	0.0493011	up-regulation

## Sheet: C5-GO-BP
NAME	GS<br> follow link to MSigDB	GS DETAILS	SIZE	ES	NES	NOM p-val	FDR q-val	FWER p-val	RANK AT MAX	LEADING EDGE
GO_DNA_DEPENDENT_DNA_REPLICATION	GO_DNA_DEPENDENT_DNA_REPLICATION	Details ...	93	0.737902	2.21554	0	0.00399877	0.01	3368	tags=58%, list=10%, signal=64%
GO_DNA_DEPENDENT_DNA_REPLICATION_MAINTENANCE_OF_FIDELITY	GO_DNA_DEPENDENT_DNA_REPLICATION_MAINTENANCE_OF_FIDELITY	Details ...	21	0.815452	2.18477	0	0.00261922	0.011	1112	tags=52%, list=3%, signal=54%
GO_DNA_REPLICATION_INITIATION	GO_DNA_REPLICATION_INITIATION	Details ...	29	0.827698	2.09303	0.00399202	0.0147957	0.065	2207	tags=76%, list=7%, signal=81%
GO_MITOTIC_RECOMBINATION	GO_MITOTIC_RECOMBINATION	Details ...	41	0.783909	2.08597	0	0.0129071	0.07	1069	tags=56%, list=3%, signal=58%
GO_DNA_REPLICATION	GO_DNA_REPLICATION	Details ...	197	0.6303	2.0767	0	0.0124171	0.08	3368	tags=50%, list=10%, signal=55%
GO_CENTROMERE_COMPLEX_ASSEMBLY	GO_CENTROMERE_COMPLEX_ASSEMBLY	Details ...	45	0.741253	2.06384	0	0.0132951	0.096	4482	tags=62%, list=13%, signal=72%
GO_DNA_RECOMBINATION	GO_DNA_RECOMBINATION	Details ...	195	0.580472	2.05349	0	0.0147363	0.123	4056	tags=43%, list=12%, signal=49%
GO_DNA_REPLICATION_INDEPENDENT_NUCLEOSOME_ASSEMBLY	GO_DNA_REPLICATION_INDEPENDENT_NUCLEOSOME_ASSEMBLY	Details ...	50	0.691461	2.02127	0	0.0224517	0.175	5492	tags=60%, list=17%, signal=72%
GO_DNA_REPLICATION_INDEPENDENT_NUCLEOSOME_ORGANIZATION	GO_DNA_REPLICATION_INDEPENDENT_NUCLEOSOME_ORGANIZATION	Details ...	50	0.691461	2.02127	0	0.019957	0.175	5492	tags=60%, list=17%, signal=72%
GO_ATP_DEPENDENT_CHROMATIN_REMODELING	GO_ATP_DEPENDENT_CHROMATIN_REMODELING	Details ...	69	0.643567	2.00235	0	0.0242283	0.212	5713	tags=55%, list=17%, signal=66%
GO_TELOMERE_MAINTENANCE_VIA_RECOMBINATION	GO_TELOMERE_MAINTENANCE_VIA_RECOMBINATION	Details ...	32	0.789858	1.99171	0	0.0259782	0.236	1069	tags=59%, list=3%, signal=61%
GO_TRNA_PROCESSING	GO_TRNA_PROCESSING	Details ...	106	0.609782	1.97692	0	0.0303849	0.266	5648	tags=58%, list=17%, signal=69%
GO_DNA_STRAND_ELONGATION_INVOLVED_IN_DNA_REPLICATION	GO_DNA_STRAND_ELONGATION_INVOLVED_IN_DNA_REPLICATION	Details ...	25	0.807859	1.97245	0.00204082	0.0300052	0.273	2818	tags=68%, list=8%, signal=74%
GO_TRNA_METABOLIC_PROCESS	GO_TRNA_METABOLIC_PROCESS	Details ...	166	0.602044	1.96407	0.00192308	0.0322146	0.289	6169	tags=57%, list=19%, signal=70%
GO_HISTONE_EXCHANGE	GO_HISTONE_EXCHANGE	Details ...	48	0.685138	1.96095	0	0.0315874	0.294	5713	tags=65%, list=17%, signal=78%
GO_SISTER_CHROMATID_SEGREGATION	GO_SISTER_CHROMATID_SEGREGATION	Details ...	165	0.620571	1.95389	0.0184426	0.0326772	0.314	2133	tags=41%, list=6%, signal=44%
GO_RECOMBINATIONAL_REPAIR	GO_RECOMBINATIONAL_REPAIR	Details ...	72	0.601887	1.93831	0	0.0383025	0.357	4584	tags=46%, list=14%, signal=53%
GO_MITOTIC_SISTER_CHROMATID_SEGREGATION	GO_MITOTIC_SISTER_CHROMATID_SEGREGATION	Details ...	88	0.637922	1.93831	0.0147368	0.0361746	0.357	1598	tags=38%, list=5%, signal=39%
GO_PROTEIN_LOCALIZATION_TO_CHROMOSOME	GO_PROTEIN_LOCALIZATION_TO_CHROMOSOME	Details ...	38	0.653373	1.93818	0.00756144	0.0342905	0.357	2930	tags=50%, list=9%, signal=55%
GO_INTERSTRAND_CROSS_LINK_REPAIR	GO_INTERSTRAND_CROSS_LINK_REPAIR	Details ...	40	0.637509	1.93575	0.00190476	0.033512	0.362	4600	tags=58%, list=14%, signal=67%
GO_DNA_STRAND_ELONGATION	GO_DNA_STRAND_ELONGATION		30	0.74107	1.93293	0.00984252	0.0333428	0.371	2818	tags=60%, list=8%, signal=65%
GO_TELOMERE_ORGANIZATION	GO_TELOMERE_ORGANIZATION		103	0.554386	1.923	0.00178571	0.0364633	0.401	5939	tags=49%, list=18%, signal=59%
GO_DNA_BIOSYNTHETIC_PROCESS	GO_DNA_BIOSYNTHETIC_PROCESS		111	0.565273	1.90816	0.00764818	0.0427495	0.44	5444	tags=50%, list=16%, signal=60%
GO_DNA_REPAIR	GO_DNA_REPAIR		448	0.495908	1.90729	0.0018797	0.0413474	0.443	5475	tags=42%, list=16%, signal=50%
GO_CHROMOSOME_SEGREGATION	GO_CHROMOSOME_SEGREGATION		251	0.563148	1.90381	0.0141129	0.041749	0.45	4767	tags=43%, list=14%, signal=50%
GO_MITOTIC_CELL_CYCLE_CHECKPOINT	GO_MITOTIC_CELL_CYCLE_CHECKPOINT		130	0.529176	1.89598	0.00364299	0.0443962	0.475	4465	tags=43%, list=13%, signal=50%
GO_NUCLEAR_CHROMOSOME_SEGREGATION	GO_NUCLEAR_CHROMOSOME_SEGREGATION		208	0.568296	1.89374	0.0196078	0.0438695	0.483	2157	tags=36%, list=6%, signal=38%
GO_REGULATION_OF_CHROMOSOME_SEGREGATION	GO_REGULATION_OF_CHROMOSOME_SEGREGATION		77	0.595441	1.89288	0.0153551	0.0427894	0.484	4465	tags=47%, list=13%, signal=54%
GO_TRNA_MODIFICATION	GO_TRNA_MODIFICATION		53	0.63621	1.88961	0.00195312	0.0430565	0.491	3196	tags=49%, list=10%, signal=54%
GO_CELL_CYCLE_CHECKPOINT	GO_CELL_CYCLE_CHECKPOINT		182	0.525622	1.88884	0.011194	0.0419275	0.492	3790	tags=41%, list=11%, signal=46%
GO_SISTER_CHROMATID_COHESION	GO_SISTER_CHROMATID_COHESION		102	0.650536	1.88404	0.018711	0.0432443	0.506	2133	tags=46%, list=6%, signal=49%
GO_REGULATION_OF_DOUBLE_STRAND_BREAK_REPAIR_VIA_HOMOLOGOUS_RECOMBINATION	GO_REGULATION_OF_DOUBLE_STRAND_BREAK_REPAIR_VIA_HOMOLOGOUS_RECOMBINATION		17	0.705289	1.88279	0.00362976	0.0423932	0.509	2566	tags=47%, list=8%, signal=51%
GO_DNA_CONFORMATION_CHANGE	GO_DNA_CONFORMATION_CHANGE		255	0.510852	1.88033	0.0071048	0.0424253	0.515	5791	tags=45%, list=17%, signal=54%
GO_DNA_SYNTHESIS_INVOLVED_IN_DNA_REPAIR	GO_DNA_SYNTHESIS_INVOLVED_IN_DNA_REPAIR		71	0.598055	1.86975	0.013308	0.046628	0.546	2404	tags=42%, list=7%, signal=45%
GO_TRNA_METHYLATION	GO_TRNA_METHYLATION		20	0.677368	1.86718	0	0.0466923	0.554	3025	tags=50%, list=9%, signal=55%
GO_RETROGRADE_VESICLE_MEDIATED_TRANSPORT_GOLGI_TO_ER	GO_RETROGRADE_VESICLE_MEDIATED_TRANSPORT_GOLGI_TO_ER		75	0.546355	1.85667	0.00562852	0.0514067	0.591	6155	tags=48%, list=19%, signal=59%
GO_STRAND_DISPLACEMENT	GO_STRAND_DISPLACEMENT		26	0.713522	1.85585	0.0148976	0.0505258	0.598	1907	tags=54%, list=6%, signal=57%
GO_DNA_CATABOLIC_PROCESS	GO_DNA_CATABOLIC_PROCESS		26	0.603236	1.85286	0.00536673	0.0508241	0.605	5363	tags=54%, list=16%, signal=64%
GO_PYRIMIDINE_NUCLEOTIDE_BIOSYNTHETIC_PROCESS	GO_PYRIMIDINE_NUCLEOTIDE_BIOSYNTHETIC_PROCESS		29	0.633714	1.85082	0.00367647	0.0506085	0.608	4391	tags=52%, list=13%, signal=60%
GO_MITOTIC_NUCLEAR_DIVISION	GO_MITOTIC_NUCLEAR_DIVISION		342	0.513495	1.84932	0.023622	0.050335	0.615	2157	tags=33%, list=6%, signal=35%
GO_CARBOHYDRATE_DERIVATIVE_TRANSPORT	GO_CARBOHYDRATE_DERIVATIVE_TRANSPORT		49	0.545205	1.84435	0.00846024	0.0518942	0.627	5086	tags=35%, list=15%, signal=41%
GO_SULFUR_COMPOUND_TRANSPORT	GO_SULFUR_COMPOUND_TRANSPORT		30	0.550992	1.83305	0.00311526	0.0571544	0.655	7258	tags=47%, list=22%, signal=60%
GO_PYRIMIDINE_NUCLEOTIDE_METABOLIC_PROCESS	GO_PYRIMIDINE_NUCLEOTIDE_METABOLIC_PROCESS		44	0.587939	1.83274	0.0018315	0.0560986	0.657	5639	tags=55%, list=17%, signal=66%
GO_CELL_CYCLE_G1_S_PHASE_TRANSITION	GO_CELL_CYCLE_G1_S_PHASE_TRANSITION		108	0.590193	1.83176	0.0188324	0.0554738	0.659	2392	tags=43%, list=7%, signal=46%
GO_G1_S_TRANSITION_OF_MITOTIC_CELL_CYCLE	GO_G1_S_TRANSITION_OF_MITOTIC_CELL_CYCLE		108	0.590194	1.83176	0.0188324	0.054241	0.659	2392	tags=43%, list=7%, signal=46%
GO_CHROMOSOME_CONDENSATION	GO_CHROMOSOME_CONDENSATION		27	0.666468	1.83116	0.0141414	0.0533677	0.66	6431	tags=63%, list=19%, signal=78%
GO_REGULATION_OF_MAMMARY_GLAND_EPITHELIAL_CELL_PROLIFERATION	GO_REGULATION_OF_MAMMARY_GLAND_EPITHELIAL_CELL_PROLIFERATION		16	0.683233	1.83099	0.00175439	0.0523429	0.66	4809	tags=50%, list=14%, signal=58%
GO_SPINDLE_CHECKPOINT	GO_SPINDLE_CHECKPOINT		24	0.700071	1.8308	0.00965251	0.05134	0.66	4465	tags=63%, list=13%, signal=72%
GO_BASE_EXCISION_REPAIR	GO_BASE_EXCISION_REPAIR		39	0.614361	1.83037	0.00585938	0.050559	0.661	5009	tags=59%, list=15%, signal=69%
GO_DNA_PACKAGING	GO_DNA_PACKAGING		177	0.516587	1.82695	0.00841751	0.051641	0.671	5617	tags=46%, list=17%, signal=55%
GO_DOUBLE_STRAND_BREAK_REPAIR	GO_DOUBLE_STRAND_BREAK_REPAIR		156	0.508939	1.82616	0.00728598	0.0511718	0.673	5444	tags=43%, list=16%, signal=51%
GO_PYRIMIDINE_CONTAINING_COMPOUND_BIOSYNTHETIC_PROCESS	GO_PYRIMIDINE_CONTAINING_COMPOUND_BIOSYNTHETIC_PROCESS		39	0.569636	1.81513	0.00364964	0.0564939	0.703	4391	tags=44%, list=13%, signal=50%
GO_ORGANELLE_FISSION	GO_ORGANELLE_FISSION		460	0.480831	1.8129	0.0243446	0.0568972	0.706	3800	tags=33%, list=11%, signal=37%
GO_APOPTOTIC_NUCLEAR_CHANGES	GO_APOPTOTIC_NUCLEAR_CHANGES		24	0.606923	1.81074	0.00361664	0.0571754	0.711	8843	tags=71%, list=27%, signal=96%
GO_RIBONUCLEOPROTEIN_COMPLEX_LOCALIZATION	GO_RIBONUCLEOPROTEIN_COMPLEX_LOCALIZATION		112	0.551849	1.81023	0.00793651	0.0564385	0.713	4734	tags=41%, list=14%, signal=48%
GO_NUCLEOBASE_CONTAINING_COMPOUND_TRANSPORT	GO_NUCLEOBASE_CONTAINING_COMPOUND_TRANSPORT		188	0.481545	1.80574	0.00562852	0.0581667	0.724	5153	tags=36%, list=15%, signal=42%
GO_PYRIMIDINE_NUCLEOSIDE_TRIPHOSPHATE_BIOSYNTHETIC_PROCESS	GO_PYRIMIDINE_NUCLEOSIDE_TRIPHOSPHATE_BIOSYNTHETIC_PROCESS		18	0.666508	1.80137	0.00900901	0.06007	0.739	4391	tags=61%, list=13%, signal=70%
GO_NUCLEAR_EXPORT	GO_NUCLEAR_EXPORT		139	0.515945	1.79781	0.00575816	0.0614163	0.751	4734	tags=40%, list=14%, signal=47%
GO_TERMINATION_OF_RNA_POLYMERASE_II_TRANSCRIPTION	GO_TERMINATION_OF_RNA_POLYMERASE_II_TRANSCRIPTION		61	0.568719	1.79609	0.0102041	0.0613252	0.752	6083	tags=52%, list=18%, signal=64%
GO_RNA_LOCALIZATION	GO_RNA_LOCALIZATION		174	0.500589	1.79521	0.0093633	0.0608699	0.755	4734	tags=37%, list=14%, signal=43%
GO_MEIOTIC_CELL_CYCLE_PROCESS	GO_MEIOTIC_CELL_CYCLE_PROCESS		136	0.503155	1.7942	0.0101351	0.0605851	0.757	3982	tags=32%, list=12%, signal=37%
GO_CHROMATIN_ASSEMBLY_OR_DISASSEMBLY	GO_CHROMATIN_ASSEMBLY_OR_DISASSEMBLY		163	0.50617	1.79182	0.00995025	0.0610012	0.761	5551	tags=45%, list=17%, signal=53%
GO_MISMATCH_REPAIR	GO_MISMATCH_REPAIR		30	0.63048	1.78858	0.00728598	0.0622461	0.771	3228	tags=50%, list=10%, signal=55%
GO_REGULATION_OF_HISTONE_H3_K4_METHYLATION	GO_REGULATION_OF_HISTONE_H3_K4_METHYLATION		24	0.59864	1.78144	0.0130597	0.0661351	0.787	4809	tags=50%, list=14%, signal=58%
GO_DNA_INTEGRITY_CHECKPOINT	GO_DNA_INTEGRITY_CHECKPOINT		138	0.490357	1.76998	0.0167286	0.0734199	0.807	2924	tags=36%, list=9%, signal=39%
GO_REGULATION_OF_TRANSCRIPTION_INVOLVED_IN_G1_S_TRANSITION_OF_MITOTIC_CELL_CYCLE	GO_REGULATION_OF_TRANSCRIPTION_INVOLVED_IN_G1_S_TRANSITION_OF_MITOTIC_CELL_CYCLE		26	0.700977	1.76944	0.0213592	0.0726556	0.809	2392	tags=54%, list=7%, signal=58%
GO_DNA_GEOMETRIC_CHANGE	GO_DNA_GEOMETRIC_CHANGE		80	0.548245	1.76855	0.019084	0.0722383	0.81	2656	tags=36%, list=8%, signal=39%
GO_RNA_MODIFICATION	GO_RNA_MODIFICATION		108	0.517125	1.76356	0.00924214	0.075243	0.821	5648	tags=49%, list=17%, signal=59%
GO_MITOCHONDRIAL_RNA_METABOLIC_PROCESS	GO_MITOCHONDRIAL_RNA_METABOLIC_PROCESS		24	0.673745	1.76275	0.00576923	0.0747559	0.824	7618	tags=75%, list=23%, signal=97%
GO_REGULATION_OF_CENTROSOME_CYCLE	GO_REGULATION_OF_CENTROSOME_CYCLE		38	0.596109	1.76179	0.0205993	0.0743792	0.826	1845	tags=37%, list=6%, signal=39%
GO_POSTREPLICATION_REPAIR	GO_POSTREPLICATION_REPAIR		51	0.568013	1.76082	0.0130841	0.0740252	0.826	4531	tags=43%, list=14%, signal=50%
GO_NEGATIVE_REGULATION_OF_MITOTIC_NUCLEAR_DIVISION	GO_NEGATIVE_REGULATION_OF_MITOTIC_NUCLEAR_DIVISION		32	0.600015	1.75744	0.0149254	0.0752227	0.829	4465	tags=53%, list=13%, signal=61%
GO_PROTEIN_DNA_COMPLEX_DISASSEMBLY	GO_PROTEIN_DNA_COMPLEX_DISASSEMBLY		15	0.686099	1.75729	0.0147874	0.0743366	0.829	2656	tags=40%, list=8%, signal=43%
GO_CHROMATIN_DISASSEMBLY	GO_CHROMATIN_DISASSEMBLY		15	0.686099	1.75729	0.0147874	0.0733321	0.829	2656	tags=40%, list=8%, signal=43%
GO_NUCLEOSOME_DISASSEMBLY	GO_NUCLEOSOME_DISASSEMBLY		15	0.686099	1.75729	0.0147874	0.0723543	0.829	2656	tags=40%, list=8%, signal=43%
GO_MEIOTIC_CELL_CYCLE	GO_MEIOTIC_CELL_CYCLE		168	0.483183	1.75544	0.0170358	0.0728112	0.832	3982	tags=31%, list=12%, signal=35%
GO_MITOTIC_DNA_INTEGRITY_CHECKPOINT	GO_MITOTIC_DNA_INTEGRITY_CHECKPOINT		94	0.491564	1.75484	0.0108108	0.0723373	0.834	2924	tags=36%, list=9%, signal=40%
GO_POSITIVE_REGULATION_OF_CHROMOSOME_SEGREGATION	GO_POSITIVE_REGULATION_OF_CHROMOSOME_SEGREGATION		23	0.640013	1.75374	0.0160966	0.0721729	0.838	3348	tags=48%, list=10%, signal=53%
GO_CHROMOSOME_SEPARATION	GO_CHROMOSOME_SEPARATION		18	0.630483	1.75191	0.0127042	0.0725493	0.842	958	tags=33%, list=3%, signal=34%
GO_RNA_3_END_PROCESSING	GO_RNA_3_END_PROCESSING		95	0.51786	1.75028	0.00972763	0.0728869	0.843	7625	tags=53%, list=23%, signal=68%
GO_TRANSLESION_SYNTHESIS	GO_TRANSLESION_SYNTHESIS		38	0.59364	1.74967	0.0169811	0.0724541	0.844	4531	tags=47%, list=14%, signal=55%
GO_REGULATION_OF_SISTER_CHROMATID_SEGREGATION	GO_REGULATION_OF_SISTER_CHROMATID_SEGREGATION		61	0.55074	1.74264	0.0191205	0.0769543	0.86	4465	tags=44%, list=13%, signal=51%
GO_PYRIMIDINE_NUCLEOSIDE_BIOSYNTHETIC_PROCESS	GO_PYRIMIDINE_NUCLEOSIDE_BIOSYNTHETIC_PROCESS		29	0.572283	1.74106	0.00555556	0.0771432	0.861	4391	tags=48%, list=13%, signal=56%
GO_REGULATION_OF_NUCLEAR_DIVISION	GO_REGULATION_OF_NUCLEAR_DIVISION		154	0.456266	1.7398	0.0156794	0.0771013	0.865	4465	tags=34%, list=13%, signal=39%
GO_POSITIVE_REGULATION_OF_DNA_BIOSYNTHETIC_PROCESS	GO_POSITIVE_REGULATION_OF_DNA_BIOSYNTHETIC_PROCESS		58	0.513303	1.73636	0.0170648	0.078916	0.871	4646	tags=45%, list=14%, signal=52%
GO_PROTEIN_SUMOYLATION	GO_PROTEIN_SUMOYLATION		112	0.509702	1.73525	0.0221402	0.0788731	0.873	4043	tags=37%, list=12%, signal=42%
GO_PYRIMIDINE_NUCLEOSIDE_TRIPHOSPHATE_METABOLIC_PROCESS	GO_PYRIMIDINE_NUCLEOSIDE_TRIPHOSPHATE_METABOLIC_PROCESS		20	0.63666	1.73497	0.0109489	0.0782091	0.873	4391	tags=60%, list=13%, signal=69%
GO_EXECUTION_PHASE_OF_APOPTOSIS	GO_EXECUTION_PHASE_OF_APOPTOSIS		53	0.481582	1.73139	0.00554529	0.0800763	0.879	5182	tags=42%, list=16%, signal=49%
GO_CELL_DIVISION	GO_CELL_DIVISION		431	0.456573	1.73007	0.0340909	0.0801897	0.881	4600	tags=37%, list=14%, signal=43%
GO_PSEUDOURIDINE_SYNTHESIS	GO_PSEUDOURIDINE_SYNTHESIS		17	0.699776	1.72865	0.00957854	0.080493	0.884	4908	tags=71%, list=15%, signal=83%
GO_RECIPROCAL_MEIOTIC_RECOMBINATION	GO_RECIPROCAL_MEIOTIC_RECOMBINATION		38	0.545398	1.72826	0.00702988	0.0799002	0.885	3312	tags=37%, list=10%, signal=41%
GO_RECIPROCAL_DNA_RECOMBINATION	GO_RECIPROCAL_DNA_RECOMBINATION		38	0.545398	1.72826	0.00702988	0.0790317	0.885	3312	tags=37%, list=10%, signal=41%
GO_CHROMATIN_REMODELING	GO_CHROMATIN_REMODELING		143	0.463735	1.72329	0.00732601	0.0821075	0.891	5713	tags=42%, list=17%, signal=50%
GO_REGULATION_OF_DOUBLE_STRAND_BREAK_REPAIR	GO_REGULATION_OF_DOUBLE_STRAND_BREAK_REPAIR		34	0.558455	1.72213	0.0176991	0.0820924	0.893	2924	tags=35%, list=9%, signal=39%
GO_PROTEIN_DNA_COMPLEX_SUBUNIT_ORGANIZATION	GO_PROTEIN_DNA_COMPLEX_SUBUNIT_ORGANIZATION		216	0.461269	1.71883	0.0171233	0.0838677	0.9	5791	tags=41%, list=17%, signal=50%
GO_REGULATION_OF_DNA_DEPENDENT_DNA_REPLICATION	GO_REGULATION_OF_DNA_DEPENDENT_DNA_REPLICATION		40	0.600217	1.71822	0.0314815	0.0834855	0.9	2097	tags=43%, list=6%, signal=45%
GO_MITOTIC_SPINDLE_ORGANIZATION	GO_MITOTIC_SPINDLE_ORGANIZATION		64	0.55512	1.71814	0.0458891	0.0826766	0.9	3460	tags=39%, list=10%, signal=44%
GO_MITOCHONDRIAL_TRANSLATION	GO_MITOCHONDRIAL_TRANSLATION		104	0.622476	1.71744	0.0350877	0.0824384	0.902	9696	tags=74%, list=29%, signal=104%
GO_MATURATION_OF_5_8S_RRNA_FROM_TRICISTRONIC_RRNA_TRANSCRIPT_SSU_RRNA_5_8S_RRNA_LSU_RRNA_	GO_MATURATION_OF_5_8S_RRNA_FROM_TRICISTRONIC_RRNA_TRANSCRIPT_SSU_RRNA_5_8S_RRNA_LSU_RRNA_		19	0.697897	1.71124	0.0207156	0.0863771	0.907	7099	tags=74%, list=21%, signal=94%
GO_TRNA_TRANSPORT	GO_TRNA_TRANSPORT		32	0.644062	1.70625	0.0174081	0.0894623	0.912	3441	tags=44%, list=10%, signal=49%
GO_DNA_LIGATION	GO_DNA_LIGATION		16	0.667342	1.70582	0.0115163	0.08894	0.913	5397	tags=56%, list=16%, signal=67%
GO_DNA_TEMPLATED_TRANSCRIPTION_TERMINATION	GO_DNA_TEMPLATED_TRANSCRIPTION_TERMINATION		98	0.521298	1.70474	0.0240481	0.0889171	0.913	6189	tags=49%, list=19%, signal=60%
GO_TRNA_AMINOACYLATION	GO_TRNA_AMINOACYLATION		51	0.594633	1.7046	0.0229885	0.0881688	0.913	6099	tags=53%, list=18%, signal=65%
GO_AMINO_ACID_ACTIVATION	GO_AMINO_ACID_ACTIVATION		51	0.594633	1.7046	0.0229885	0.0873211	0.913	6099	tags=53%, list=18%, signal=65%
GO_ERROR_FREE_TRANSLESION_SYNTHESIS	GO_ERROR_FREE_TRANSLESION_SYNTHESIS		18	0.693772	1.69533	0.015625	0.0943187	0.927	1349	tags=44%, list=4%, signal=46%
GO_PYRIMIDINE_DEOXYRIBONUCLEOTIDE_METABOLIC_PROCESS	GO_PYRIMIDINE_DEOXYRIBONUCLEOTIDE_METABOLIC_PROCESS		16	0.682342	1.69266	0.0166976	0.0956525	0.929	5056	tags=69%, list=15%, signal=81%
GO_CENTRIOLE_ASSEMBLY	GO_CENTRIOLE_ASSEMBLY		19	0.633769	1.69264	0.0266667	0.0947688	0.929	8995	tags=74%, list=27%, signal=101%
GO_NEGATIVE_REGULATION_OF_CELL_DIVISION	GO_NEGATIVE_REGULATION_OF_CELL_DIVISION		56	0.521433	1.6912	0.0229277	0.0951283	0.931	4465	tags=48%, list=13%, signal=56%
GO_GENE_SILENCING_BY_RNA	GO_GENE_SILENCING_BY_RNA		128	0.451024	1.6879	0.0196721	0.0972038	0.934	6124	tags=38%, list=18%, signal=46%
GO_CELLULAR_COMPONENT_DISASSEMBLY_INVOLVED_IN_EXECUTION_PHASE_OF_APOPTOSIS	GO_CELLULAR_COMPONENT_DISASSEMBLY_INVOLVED_IN_EXECUTION_PHASE_OF_APOPTOSIS		41	0.493006	1.68301	0.0166976	0.1007	0.939	5182	tags=44%, list=16%, signal=52%
GO_DNA_MODIFICATION	GO_DNA_MODIFICATION		76	0.437551	1.68184	0.0097561	0.100985	0.941	5819	tags=37%, list=17%, signal=45%
GO_MRNA_3_END_PROCESSING	GO_MRNA_3_END_PROCESSING		70	0.507996	1.68093	0.029703	0.100806	0.941	6144	tags=47%, list=18%, signal=58%
GO_RRNA_CATABOLIC_PROCESS	GO_RRNA_CATABOLIC_PROCESS		17	0.609183	1.67289	0.0155642	0.107125	0.949	7625	tags=59%, list=23%, signal=76%
GO_CELL_CYCLE_PHASE_TRANSITION	GO_CELL_CYCLE_PHASE_TRANSITION		248	0.480459	1.67135	0.0469043	0.107695	0.949	2932	tags=35%, list=9%, signal=38%
GO_REGULATION_OF_SIGNAL_TRANSDUCTION_BY_P53_CLASS_MEDIATOR	GO_REGULATION_OF_SIGNAL_TRANSDUCTION_BY_P53_CLASS_MEDIATOR		158	0.439183	1.66932	0.0209424	0.108633	0.952	2965	tags=30%, list=9%, signal=33%
GO_NEGATIVE_REGULATION_OF_MITOTIC_CELL_CYCLE	GO_NEGATIVE_REGULATION_OF_MITOTIC_CELL_CYCLE		185	0.432853	1.66623	0.0213904	0.110629	0.956	3780	tags=34%, list=11%, signal=38%
GO_PYRIMIDINE_CONTAINING_COMPOUND_METABOLIC_PROCESS	GO_PYRIMIDINE_CONTAINING_COMPOUND_METABOLIC_PROCESS		72	0.438545	1.66578	0.0117845	0.110063	0.957	5056	tags=35%, list=15%, signal=41%
GO_DEOXYRIBONUCLEOTIDE_METABOLIC_PROCESS	GO_DEOXYRIBONUCLEOTIDE_METABOLIC_PROCESS		33	0.593327	1.6655	0.0268817	0.109361	0.957	5760	tags=61%, list=17%, signal=73%
GO_NUCLEOTIDE_EXCISION_REPAIR_DNA_GAP_FILLING	GO_NUCLEOTIDE_EXCISION_REPAIR_DNA_GAP_FILLING		24	0.63511	1.66493	0.0272374	0.108954	0.958	2404	tags=46%, list=7%, signal=49%
GO_RNA_PHOSPHODIESTER_BOND_HYDROLYSIS	GO_RNA_PHOSPHODIESTER_BOND_HYDROLYSIS		107	0.455503	1.66076	0.0231317	0.112001	0.964	7625	tags=50%, list=23%, signal=64%
GO_RNA_CAPPING	GO_RNA_CAPPING		34	0.577415	1.65995	0.0234375	0.111854	0.964	3829	tags=41%, list=12%, signal=46%
GO_7_METHYLGUANOSINE_RNA_CAPPING	GO_7_METHYLGUANOSINE_RNA_CAPPING		34	0.577415	1.65995	0.0234375	0.110938	0.964	3829	tags=41%, list=12%, signal=46%
GO_HISTONE_MRNA_METABOLIC_PROCESS	GO_HISTONE_MRNA_METABOLIC_PROCESS		28	0.565188	1.65957	0.0236794	0.1104	0.965	3594	tags=46%, list=11%, signal=52%
GO_NUCLEIC_ACID_PHOSPHODIESTER_BOND_HYDROLYSIS	GO_NUCLEIC_ACID_PHOSPHODIESTER_BOND_HYDROLYSIS		231	0.424009	1.65834	0.0179211	0.110615	0.966	7774	tags=45%, list=23%, signal=59%
GO_ANAPHASE_PROMOTING_COMPLEX_DEPENDENT_CATABOLIC_PROCESS	GO_ANAPHASE_PROMOTING_COMPLEX_DEPENDENT_CATABOLIC_PROCESS		75	0.614042	1.65673	0.0459082	0.111144	0.966	5216	tags=53%, list=16%, signal=63%
GO_REGULATION_OF_DNA_RECOMBINATION	GO_REGULATION_OF_DNA_RECOMBINATION		55	0.49273	1.65536	0.0193322	0.111512	0.967	2566	tags=29%, list=8%, signal=31%
GO_MITOTIC_SPINDLE_ASSEMBLY	GO_MITOTIC_SPINDLE_ASSEMBLY		39	0.534957	1.65273	0.0419847	0.113193	0.967	5033	tags=38%, list=15%, signal=45%
GO_MICROTUBULE_CYTOSKELETON_ORGANIZATION_INVOLVED_IN_MITOSIS	GO_MICROTUBULE_CYTOSKELETON_ORGANIZATION_INVOLVED_IN_MITOSIS		39	0.534957	1.65273	0.0419847	0.112311	0.967	5033	tags=38%, list=15%, signal=45%
GO_SPINDLE_ASSEMBLY	GO_SPINDLE_ASSEMBLY		68	0.491032	1.65235	0.0457875	0.111794	0.967	3460	tags=32%, list=10%, signal=36%
GO_PROTEIN_LOCALIZATION_TO_CENTROSOME	GO_PROTEIN_LOCALIZATION_TO_CENTROSOME		15	0.600984	1.64947	0.0330275	0.113651	0.968	834	tags=33%, list=3%, signal=34%
GO_SIGNAL_TRANSDUCTION_IN_RESPONSE_TO_DNA_DAMAGE	GO_SIGNAL_TRANSDUCTION_IN_RESPONSE_TO_DNA_DAMAGE		91	0.465251	1.64361	0.0300353	0.118649	0.97	4184	tags=37%, list=13%, signal=43%
GO_CLEAVAGE_INVOLVED_IN_RRNA_PROCESSING	GO_CLEAVAGE_INVOLVED_IN_RRNA_PROCESSING		19	0.665605	1.64245	0.0299065	0.118844	0.97	8298	tags=79%, list=25%, signal=105%
GO_MEIOSIS_I	GO_MEIOSIS_I		78	0.479386	1.64173	0.0198676	0.118752	0.971	3982	tags=32%, list=12%, signal=36%
GO_DOLICHOL_LINKED_OLIGOSACCHARIDE_BIOSYNTHETIC_PROCESS	GO_DOLICHOL_LINKED_OLIGOSACCHARIDE_BIOSYNTHETIC_PROCESS		20	0.60504	1.63867	0.0295203	0.1211	0.973	6361	tags=55%, list=19%, signal=68%
GO_OLIGOSACCHARIDE_LIPID_INTERMEDIATE_BIOSYNTHETIC_PROCESS	GO_OLIGOSACCHARIDE_LIPID_INTERMEDIATE_BIOSYNTHETIC_PROCESS		20	0.60504	1.63867	0.0295203	0.120203	0.973	6361	tags=55%, list=19%, signal=68%
GO_NUCLEAR_TRANSCRIBED_MRNA_CATABOLIC_PROCESS_EXONUCLEOLYTIC	GO_NUCLEAR_TRANSCRIBED_MRNA_CATABOLIC_PROCESS_EXONUCLEOLYTIC		30	0.564827	1.62851	0.0267686	0.129674	0.977	7625	tags=63%, list=23%, signal=82%
GO_NEGATIVE_REGULATION_OF_CHROMOSOME_SEGREGATION	GO_NEGATIVE_REGULATION_OF_CHROMOSOME_SEGREGATION		25	0.603362	1.62567	0.0485437	0.131901	0.979	4465	tags=52%, list=13%, signal=60%
GO_PROTEIN_EXPORT_FROM_NUCLEUS	GO_PROTEIN_EXPORT_FROM_NUCLEUS		29	0.543115	1.62561	0.0305206	0.130999	0.979	3771	tags=45%, list=11%, signal=51%
GO_PROTEIN_EXIT_FROM_ENDOPLASMIC_RETICULUM	GO_PROTEIN_EXIT_FROM_ENDOPLASMIC_RETICULUM		19	0.631212	1.625	0.0363985	0.130748	0.98	3727	tags=58%, list=11%, signal=65%
GO_RNA_SPLICING_VIA_ENDONUCLEOLYTIC_CLEAVAGE_AND_LIGATION	GO_RNA_SPLICING_VIA_ENDONUCLEOLYTIC_CLEAVAGE_AND_LIGATION		15	0.610917	1.62408	0.0326923	0.130708	0.98	7356	tags=73%, list=22%, signal=94%
GO_POSITIVE_REGULATION_OF_CYTOKINESIS	GO_POSITIVE_REGULATION_OF_CYTOKINESIS		28	0.546588	1.62362	0.0469314	0.130298	0.98	3720	tags=43%, list=11%, signal=48%
GO_REGULATION_OF_TRANSCRIPTION_FROM_RNA_POLYMERASE_I_PROMOTER	GO_REGULATION_OF_TRANSCRIPTION_FROM_RNA_POLYMERASE_I_PROMOTER		23	0.551134	1.62307	0.0223368	0.129925	0.98	4419	tags=48%, list=13%, signal=55%
GO_RNA_POLYADENYLATION	GO_RNA_POLYADENYLATION		28	0.53482	1.62271	0.0304762	0.129462	0.981	7547	tags=57%, list=23%, signal=74%
GO_PYRIMIDINE_RIBONUCLEOTIDE_METABOLIC_PROCESS	GO_PYRIMIDINE_RIBONUCLEOTIDE_METABOLIC_PROCESS		23	0.542216	1.61504	0.0233813	0.136749	0.982	4391	tags=43%, list=13%, signal=50%
GO_POSITIVE_REGULATION_OF_TELOMERE_MAINTENANCE_VIA_TELOMERE_LENGTHENING	GO_POSITIVE_REGULATION_OF_TELOMERE_MAINTENANCE_VIA_TELOMERE_LENGTHENING		33	0.532241	1.61454	0.037037	0.136367	0.982	3542	tags=39%, list=11%, signal=44%
GO_NCRNA_3_END_PROCESSING	GO_NCRNA_3_END_PROCESSING		20	0.648563	1.60786	0.0364683	0.142585	0.983	8404	tags=70%, list=25%, signal=94%
GO_POSITIVE_REGULATION_OF_CELL_CYCLE_PROCESS	GO_POSITIVE_REGULATION_OF_CELL_CYCLE_PROCESS		228	0.406947	1.60497	0.0277778	0.14468	0.984	3846	tags=30%, list=12%, signal=33%
GO_NCRNA_CATABOLIC_PROCESS	GO_NCRNA_CATABOLIC_PROCESS		22	0.523891	1.6047	0.0336449	0.144002	0.984	2898	tags=36%, list=9%, signal=40%
GO_NUCLEOTIDE_TRANSPORT	GO_NUCLEOTIDE_TRANSPORT		25	0.504172	1.60397	0.0250417	0.14383	0.986	875	tags=24%, list=3%, signal=25%
GO_REGULATION_OF_CELL_CYCLE_G2_M_PHASE_TRANSITION	GO_REGULATION_OF_CELL_CYCLE_G2_M_PHASE_TRANSITION		58	0.461181	1.60287	0.0383275	0.14404	0.986	2709	tags=33%, list=8%, signal=36%
GO_DNA_METHYLATION	GO_DNA_METHYLATION		43	0.456502	1.59987	0.0237342	0.146281	0.986	5819	tags=37%, list=17%, signal=45%
GO_DNA_ALKYLATION	GO_DNA_ALKYLATION		43	0.456502	1.59987	0.0237342	0.145318	0.986	5819	tags=37%, list=17%, signal=45%
GO_MACROMOLECULAR_COMPLEX_DISASSEMBLY	GO_MACROMOLECULAR_COMPLEX_DISASSEMBLY		174	0.469838	1.59824	0.0580524	0.146218	0.989	7513	tags=49%, list=23%, signal=63%
GO_DNA_DAMAGE_RESPONSE_DETECTION_OF_DNA_DAMAGE	GO_DNA_DAMAGE_RESPONSE_DETECTION_OF_DNA_DAMAGE		36	0.582403	1.59718	0.0665399	0.146481	0.989	1036	tags=33%, list=3%, signal=34%
GO_NEGATIVE_REGULATION_OF_CELL_CYCLE_PROCESS	GO_NEGATIVE_REGULATION_OF_CELL_CYCLE_PROCESS		200	0.416583	1.59702	0.0316901	0.145699	0.989	3790	tags=34%, list=11%, signal=38%
GO_REGULATION_OF_DNA_REPLICATION	GO_REGULATION_OF_DNA_REPLICATION		154	0.430439	1.59568	0.035533	0.146326	0.99	3867	tags=34%, list=12%, signal=38%
GO_PROTEIN_MANNOSYLATION	GO_PROTEIN_MANNOSYLATION		18	0.543328	1.5951	0.0348837	0.146125	0.99	8302	tags=56%, list=25%, signal=74%
GO_SOMATIC_DIVERSIFICATION_OF_IMMUNE_RECEPTORS	GO_SOMATIC_DIVERSIFICATION_OF_IMMUNE_RECEPTORS		40	0.493351	1.59491	0.0427807	0.145403	0.99	7166	tags=48%, list=22%, signal=60%
GO_PYRIMIDINE_NUCLEOSIDE_METABOLIC_PROCESS	GO_PYRIMIDINE_NUCLEOSIDE_METABOLIC_PROCESS		46	0.465137	1.59364	0.0211268	0.145918	0.99	7360	tags=46%, list=22%, signal=59%
GO_RETROGRADE_PROTEIN_TRANSPORT_ER_TO_CYTOSOL	GO_RETROGRADE_PROTEIN_TRANSPORT_ER_TO_CYTOSOL		15	0.619498	1.58949	0.0437262	0.149595	0.992	3004	tags=53%, list=9%, signal=59%
GO_SNRNA_PROCESSING	GO_SNRNA_PROCESSING		21	0.591446	1.58888	0.0307692	0.149391	0.993	8500	tags=67%, list=26%, signal=89%
GO_MITOTIC_G2_M_TRANSITION_CHECKPOINT	GO_MITOTIC_G2_M_TRANSITION_CHECKPOINT		18	0.570026	1.58881	0.0462428	0.148532	0.993	2709	tags=44%, list=8%, signal=48%
GO_REGULATION_OF_CELL_CYCLE_ARREST	GO_REGULATION_OF_CELL_CYCLE_ARREST		100	0.419621	1.587	0.0381944	0.149757	0.993	3694	tags=33%, list=11%, signal=37%
GO_SOMATIC_DIVERSIFICATION_OF_IMMUNOGLOBULINS	GO_SOMATIC_DIVERSIFICATION_OF_IMMUNOGLOBULINS		28	0.526051	1.5819	0.0442804	0.154735	0.993	7808	tags=57%, list=23%, signal=75%
GO_DSRNA_FRAGMENTATION	GO_DSRNA_FRAGMENTATION		18	0.542759	1.58128	0.0543689	0.154576	0.993	5384	tags=44%, list=16%, signal=53%
GO_PRODUCTION_OF_SMALL_RNA_INVOLVED_IN_GENE_SILENCING_BY_RNA	GO_PRODUCTION_OF_SMALL_RNA_INVOLVED_IN_GENE_SILENCING_BY_RNA		18	0.542759	1.58128	0.0543689	0.153645	0.993	5384	tags=44%, list=16%, signal=53%
GO_REGULATION_OF_EXIT_FROM_MITOSIS	GO_REGULATION_OF_EXIT_FROM_MITOSIS		15	0.595991	1.58083	0.0742188	0.153243	0.993	4410	tags=40%, list=13%, signal=46%
GO_DNA_DAMAGE_RESPONSE_SIGNAL_TRANSDUCTION_RESULTING_IN_TRANSCRIPTION	GO_DNA_DAMAGE_RESPONSE_SIGNAL_TRANSDUCTION_RESULTING_IN_TRANSCRIPTION		15	0.575291	1.58054	0.0281195	0.152665	0.993	5604	tags=53%, list=17%, signal=64%
GO_GENE_SILENCING	GO_GENE_SILENCING		185	0.408544	1.57935	0.0436975	0.153143	0.993	6124	tags=36%, list=18%, signal=43%
GO_NEGATIVE_REGULATION_OF_CELL_CYCLE_PHASE_TRANSITION	GO_NEGATIVE_REGULATION_OF_CELL_CYCLE_PHASE_TRANSITION		138	0.426293	1.57913	0.0327273	0.152499	0.993	3790	tags=36%, list=11%, signal=40%
GO_METAPHASE_PLATE_CONGRESSION	GO_METAPHASE_PLATE_CONGRESSION		41	0.533271	1.57856	0.0613861	0.152312	0.993	1598	tags=34%, list=5%, signal=36%
GO_CENTROSOME_CYCLE	GO_CENTROSOME_CYCLE		45	0.518364	1.57756	0.0696799	0.152465	0.993	2932	tags=33%, list=9%, signal=37%
GO_REGULATION_OF_CELL_DIVISION	GO_REGULATION_OF_CELL_DIVISION		251	0.384304	1.57463	0.0464744	0.154931	0.993	3846	tags=27%, list=12%, signal=31%
GO_REGULATION_OF_HISTONE_H3_K9_METHYLATION	GO_REGULATION_OF_HISTONE_H3_K9_METHYLATION		17	0.546466	1.57394	0.0385965	0.154793	0.993	4305	tags=53%, list=13%, signal=61%
GO_DNA_CATABOLIC_PROCESS_ENDONUCLEOLYTIC	GO_DNA_CATABOLIC_PROCESS_ENDONUCLEOLYTIC		18	0.554024	1.57167	0.0339893	0.156552	0.993	8843	tags=61%, list=27%, signal=83%
GO_REGULATION_OF_CYTOKINESIS	GO_REGULATION_OF_CYTOKINESIS		56	0.474304	1.57152	0.0526316	0.155862	0.993	3720	tags=36%, list=11%, signal=40%
GO_REGULATION_OF_TELOMERE_MAINTENANCE_VIA_TELOMERE_LENGTHENING	GO_REGULATION_OF_TELOMERE_MAINTENANCE_VIA_TELOMERE_LENGTHENING		50	0.490563	1.5695	0.0454545	0.157237	0.994	3786	tags=38%, list=11%, signal=43%
GO_NEGATIVE_REGULATION_OF_NUCLEAR_DIVISION	GO_NEGATIVE_REGULATION_OF_NUCLEAR_DIVISION		42	0.50884	1.56813	0.0541012	0.15805	0.994	4465	tags=48%, list=13%, signal=55%
GO_SPLICEOSOMAL_SNRNP_ASSEMBLY	GO_SPLICEOSOMAL_SNRNP_ASSEMBLY		37	0.584626	1.56544	0.0665362	0.16016	0.994	6013	tags=51%, list=18%, signal=63%
GO_DEOXYRIBOSE_PHOSPHATE_CATABOLIC_PROCESS	GO_DEOXYRIBOSE_PHOSPHATE_CATABOLIC_PROCESS		21	0.56941	1.55982	0.046595	0.165982	0.996	5760	tags=62%, list=17%, signal=75%
GO_PROTEIN_N_LINKED_GLYCOSYLATION	GO_PROTEIN_N_LINKED_GLYCOSYLATION		73	0.452819	1.55848	0.0380795	0.166734	0.996	5288	tags=36%, list=16%, signal=42%
GO_GPI_ANCHOR_METABOLIC_PROCESS	GO_GPI_ANCHOR_METABOLIC_PROCESS		32	0.526513	1.55606	0.0492958	0.168754	0.997	8006	tags=53%, list=24%, signal=70%
GO_NUCLEOBASE_BIOSYNTHETIC_PROCESS	GO_NUCLEOBASE_BIOSYNTHETIC_PROCESS		18	0.621851	1.55542	0.0689013	0.168624	0.997	5760	tags=56%, list=17%, signal=67%
GO_NEGATIVE_REGULATION_OF_HISTONE_METHYLATION	GO_NEGATIVE_REGULATION_OF_HISTONE_METHYLATION		16	0.580054	1.55293	0.0443262	0.170762	0.997	3181	tags=56%, list=10%, signal=62%
GO_TRANSLATIONAL_TERMINATION	GO_TRANSLATIONAL_TERMINATION		91	0.576083	1.55275	0.0955166	0.170032	0.997	9696	tags=71%, list=29%, signal=101%
GO_G1_DNA_DAMAGE_CHECKPOINT	GO_G1_DNA_DAMAGE_CHECKPOINT		68	0.458017	1.55176	0.0376344	0.170394	0.997	4019	tags=38%, list=12%, signal=43%
GO_POSITIVE_REGULATION_OF_CELL_CYCLE_ARREST	GO_POSITIVE_REGULATION_OF_CELL_CYCLE_ARREST		79	0.431151	1.55046	0.0459364	0.171068	0.998	3694	tags=35%, list=11%, signal=40%
GO_NUCLEOSIDE_TRANSPORT	GO_NUCLEOSIDE_TRANSPORT		16	0.561864	1.54987	0.0434028	0.170821	0.998	5888	tags=44%, list=18%, signal=53%
GO_RNA_METHYLATION	GO_RNA_METHYLATION		47	0.487443	1.54465	0.0528233	0.176407	0.998	5388	tags=45%, list=16%, signal=53%
GO_REGULATION_OF_CELL_CYCLE_PHASE_TRANSITION	GO_REGULATION_OF_CELL_CYCLE_PHASE_TRANSITION		310	0.402576	1.53595	0.0490018	0.186761	0.999	3790	tags=33%, list=11%, signal=36%
GO_GUANOSINE_CONTAINING_COMPOUND_BIOSYNTHETIC_PROCESS	GO_GUANOSINE_CONTAINING_COMPOUND_BIOSYNTHETIC_PROCESS		15	0.612839	1.53566	0.0564374	0.186115	0.999	4391	tags=53%, list=13%, signal=61%
GO_MATURATION_OF_5_8S_RRNA	GO_MATURATION_OF_5_8S_RRNA		28	0.579386	1.53341	0.0756144	0.188095	0.999	7625	tags=64%, list=23%, signal=83%
GO_RESPONSE_TO_IONIZING_RADIATION	GO_RESPONSE_TO_IONIZING_RADIATION		138	0.399033	1.5329	0.0567613	0.187763	0.999	5777	tags=38%, list=17%, signal=46%
GO_SNRNA_METABOLIC_PROCESS	GO_SNRNA_METABOLIC_PROCESS		75	0.454162	1.52948	0.0568182	0.191327	0.999	3836	tags=33%, list=12%, signal=38%
GO_ERROR_PRONE_TRANSLESION_SYNTHESIS	GO_ERROR_PRONE_TRANSLESION_SYNTHESIS		19	0.570643	1.52835	0.0533088	0.191792	0.999	1996	tags=42%, list=6%, signal=45%
GO_REGULATION_OF_MITOTIC_CELL_CYCLE	GO_REGULATION_OF_MITOTIC_CELL_CYCLE		446	0.383397	1.52782	0.0512367	0.191519	0.999	3846	tags=30%, list=12%, signal=34%
GO_REGULATION_OF_PROTEIN_UBIQUITINATION_INVOLVED_IN_UBIQUITIN_DEPENDENT_PROTEIN_CATABOLIC_PROCESS	GO_REGULATION_OF_PROTEIN_UBIQUITINATION_INVOLVED_IN_UBIQUITIN_DEPENDENT_PROTEIN_CATABOLIC_PROCESS		101	0.48146	1.52562	0.0933333	0.19348	0.999	3528	tags=35%, list=11%, signal=39%
GO_REGULATION_OF_UBIQUITIN_PROTEIN_LIGASE_ACTIVITY	GO_REGULATION_OF_UBIQUITIN_PROTEIN_LIGASE_ACTIVITY		17	0.55175	1.52205	0.0598911	0.197284	0.999	3530	tags=41%, list=11%, signal=46%
GO_POSITIVE_REGULATION_OF_MITOTIC_NUCLEAR_DIVISION	GO_POSITIVE_REGULATION_OF_MITOTIC_NUCLEAR_DIVISION		47	0.441401	1.52156	0.0692042	0.196902	0.999	3846	tags=28%, list=12%, signal=31%
GO_NCRNA_TRANSCRIPTION	GO_NCRNA_TRANSCRIPTION		81	0.440898	1.5211	0.0586011	0.196578	0.999	3836	tags=32%, list=12%, signal=36%
GO_CYTOSKELETON_DEPENDENT_CYTOKINESIS	GO_CYTOSKELETON_DEPENDENT_CYTOKINESIS		39	0.519853	1.5203	0.0849802	0.196661	0.999	4104	tags=41%, list=12%, signal=47%
GO_APOPTOTIC_DNA_FRAGMENTATION	GO_APOPTOTIC_DNA_FRAGMENTATION		15	0.553988	1.52008	0.0683012	0.195954	0.999	8843	tags=67%, list=27%, signal=91%
GO_NUCLEOSIDE_SALVAGE	GO_NUCLEOSIDE_SALVAGE		16	0.590772	1.51951	0.0544815	0.195755	0.999	5639	tags=50%, list=17%, signal=60%
GO_CELLULAR_PROTEIN_COMPLEX_DISASSEMBLY	GO_CELLULAR_PROTEIN_COMPLEX_DISASSEMBLY		119	0.497361	1.51891	0.101923	0.195498	0.999	7494	tags=53%, list=23%, signal=68%
GO_SPERM_EGG_RECOGNITION	GO_SPERM_EGG_RECOGNITION		39	0.427076	1.51606	0.0436137	0.198375	0.999	8484	tags=46%, list=26%, signal=62%
GO_MEMBRANE_DISASSEMBLY	GO_MEMBRANE_DISASSEMBLY		44	0.52333	1.5114	0.0980392	0.203716	0.999	1912	tags=36%, list=6%, signal=39%
GO_NUCLEAR_ENVELOPE_DISASSEMBLY	GO_NUCLEAR_ENVELOPE_DISASSEMBLY		44	0.52333	1.5114	0.0980392	0.202732	0.999	1912	tags=36%, list=6%, signal=39%
GO_PYRIMIDINE_RIBONUCLEOSIDE_TRIPHOSPHATE_METABOLIC_PROCESS	GO_PYRIMIDINE_RIBONUCLEOSIDE_TRIPHOSPHATE_METABOLIC_PROCESS		15	0.577986	1.5093	0.0652174	0.204584	0.999	4391	tags=53%, list=13%, signal=61%
GO_NEGATIVE_REGULATION_OF_DNA_REPLICATION	GO_NEGATIVE_REGULATION_OF_DNA_REPLICATION		52	0.444183	1.50843	0.0488246	0.204811	0.999	3867	tags=33%, list=12%, signal=37%
GO_RESPONSE_TO_GAMMA_RADIATION	GO_RESPONSE_TO_GAMMA_RADIATION		49	0.426879	1.50597	0.0479339	0.207231	1	5777	tags=45%, list=17%, signal=54%
GO_RRNA_TRANSCRIPTION	GO_RRNA_TRANSCRIPTION		17	0.553236	1.50568	0.0688406	0.20663	1	3628	tags=47%, list=11%, signal=53%
GO_RNA_PHOSPHODIESTER_BOND_HYDROLYSIS_ENDONUCLEOLYTIC	GO_RNA_PHOSPHODIESTER_BOND_HYDROLYSIS_ENDONUCLEOLYTIC		54	0.458229	1.5054	0.0609982	0.206042	1	5599	tags=44%, list=17%, signal=53%
GO_CHROMOSOME_LOCALIZATION	GO_CHROMOSOME_LOCALIZATION		56	0.491743	1.50489	0.0896686	0.205734	1	1598	tags=30%, list=5%, signal=32%
GO_REGULATION_OF_DNA_METABOLIC_PROCESS	GO_REGULATION_OF_DNA_METABOLIC_PROCESS		322	0.375229	1.50379	0.0481728	0.206274	1	2924	tags=25%, list=9%, signal=28%
GO_POSITIVE_REGULATION_OF_DNA_METABOLIC_PROCESS	GO_POSITIVE_REGULATION_OF_DNA_METABOLIC_PROCESS		178	0.385582	1.50374	0.0409165	0.205391	1	3052	tags=28%, list=9%, signal=30%
GO_POSITIVE_REGULATION_OF_MITOCHONDRIAL_OUTER_MEMBRANE_PERMEABILIZATION_INVOLVED_IN_APOPTOTIC_SIGNALING_PATHWAY	GO_POSITIVE_REGULATION_OF_MITOCHONDRIAL_OUTER_MEMBRANE_PERMEABILIZATION_INVOLVED_IN_APOPTOTIC_SIGNALING_PATHWAY		36	0.495712	1.5032	0.0670391	0.205209	1	5525	tags=50%, list=17%, signal=60%
GO_SOMATIC_DIVERSIFICATION_OF_IMMUNE_RECEPTORS_VIA_GERMLINE_RECOMBINATION_WITHIN_A_SINGLE_LOCUS	GO_SOMATIC_DIVERSIFICATION_OF_IMMUNE_RECEPTORS_VIA_GERMLINE_RECOMBINATION_WITHIN_A_SINGLE_LOCUS		32	0.481118	1.50113	0.0792254	0.207129	1	6403	tags=44%, list=19%, signal=54%
GO_SOMATIC_CELL_DNA_RECOMBINATION	GO_SOMATIC_CELL_DNA_RECOMBINATION		32	0.481118	1.50113	0.0792254	0.206178	1	6403	tags=44%, list=19%, signal=54%
GO_REGULATION_OF_TELOMERASE_RNA_LOCALIZATION_TO_CAJAL_BODY	GO_REGULATION_OF_TELOMERASE_RNA_LOCALIZATION_TO_CAJAL_BODY		15	0.667753	1.50105	0.0856611	0.205349	1	3542	tags=60%, list=11%, signal=67%
GO_POSITIVE_REGULATION_OF_TELOMERASE_RNA_LOCALIZATION_TO_CAJAL_BODY	GO_POSITIVE_REGULATION_OF_TELOMERASE_RNA_LOCALIZATION_TO_CAJAL_BODY		15	0.667753	1.50105	0.0856611	0.204415	1	3542	tags=60%, list=11%, signal=67%
GO_POSITIVE_REGULATION_OF_TELOMERE_MAINTENANCE	GO_POSITIVE_REGULATION_OF_TELOMERE_MAINTENANCE		46	0.458548	1.49977	0.053286	0.205148	1	5939	tags=43%, list=18%, signal=53%
GO_HISTONE_PHOSPHORYLATION	GO_HISTONE_PHOSPHORYLATION		24	0.522817	1.49878	0.0753065	0.205592	1	1514	tags=38%, list=5%, signal=39%
GO_MISFOLDED_OR_INCOMPLETELY_SYNTHESIZED_PROTEIN_CATABOLIC_PROCESS	GO_MISFOLDED_OR_INCOMPLETELY_SYNTHESIZED_PROTEIN_CATABOLIC_PROCESS		16	0.531576	1.49179	0.0714286	0.213958	1	3548	tags=44%, list=11%, signal=49%
GO_REGULATION_OF_CELLULAR_AMINO_ACID_METABOLIC_PROCESS	GO_REGULATION_OF_CELLULAR_AMINO_ACID_METABOLIC_PROCESS		65	0.510656	1.49081	0.120658	0.214359	1	9007	tags=58%, list=27%, signal=80%
GO_DNA_METHYLATION_OR_DEMETHYLATION	GO_DNA_METHYLATION_OR_DEMETHYLATION		57	0.402087	1.48881	0.0495208	0.216111	1	5819	tags=33%, list=17%, signal=40%
GO_REGULATION_OF_DNA_BIOSYNTHETIC_PROCESS	GO_REGULATION_OF_DNA_BIOSYNTHETIC_PROCESS		91	0.413635	1.48871	0.0622951	0.215293	1	3846	tags=35%, list=12%, signal=40%
GO_MALE_MEIOSIS	GO_MALE_MEIOSIS		34	0.463917	1.48508	0.045977	0.219324	1	1185	tags=18%, list=4%, signal=18%
GO_RNA_SPLICING_VIA_TRANSESTERIFICATION_REACTIONS	GO_RNA_SPLICING_VIA_TRANSESTERIFICATION_REACTIONS		258	0.431452	1.48477	0.10142	0.218786	1	6124	tags=38%, list=18%, signal=47%
GO_PYRIMIDINE_RIBONUCLEOSIDE_METABOLIC_PROCESS	GO_PYRIMIDINE_RIBONUCLEOSIDE_METABOLIC_PROCESS		31	0.458463	1.48447	0.0510563	0.218223	1	4534	tags=35%, list=14%, signal=41%
GO_SOMATIC_RECOMBINATION_OF_IMMUNOGLOBULIN_GENE_SEGMENTS	GO_SOMATIC_RECOMBINATION_OF_IMMUNOGLOBULIN_GENE_SEGMENTS		21	0.522723	1.48419	0.0857664	0.217644	1	6403	tags=52%, list=19%, signal=65%
GO_NEGATIVE_REGULATION_OF_CELL_CYCLE_G2_M_PHASE_TRANSITION	GO_NEGATIVE_REGULATION_OF_CELL_CYCLE_G2_M_PHASE_TRANSITION		24	0.490761	1.48236	0.059387	0.219319	1	2709	tags=42%, list=8%, signal=45%
GO_DEOXYRIBONUCLEOSIDE_TRIPHOSPHATE_METABOLIC_PROCESS	GO_DEOXYRIBONUCLEOSIDE_TRIPHOSPHATE_METABOLIC_PROCESS		16	0.62072	1.48167	0.0809793	0.219293	1	5760	tags=69%, list=17%, signal=83%
GO_MANNOSYLATION	GO_MANNOSYLATION		30	0.461282	1.48082	0.0567986	0.21952	1	8302	tags=47%, list=25%, signal=62%
GO_METHYLATION	GO_METHYLATION		247	0.357632	1.47979	0.0338983	0.219963	1	5886	tags=36%, list=18%, signal=43%
GO_NEGATIVE_REGULATION_OF_PROTEIN_MODIFICATION_BY_SMALL_PROTEIN_CONJUGATION_OR_REMOVAL	GO_NEGATIVE_REGULATION_OF_PROTEIN_MODIFICATION_BY_SMALL_PROTEIN_CONJUGATION_OR_REMOVAL		134	0.44161	1.47962	0.101476	0.219241	1	5216	tags=38%, list=16%, signal=45%
GO_NUCLEOTIDE_EXCISION_REPAIR	GO_NUCLEOTIDE_EXCISION_REPAIR		111	0.431524	1.47914	0.0766208	0.219017	1	5009	tags=36%, list=15%, signal=42%
GO_REGULATION_OF_DNA_METHYLATION	GO_REGULATION_OF_DNA_METHYLATION		15	0.540491	1.4758	0.0994264	0.222849	1	2021	tags=40%, list=6%, signal=43%
GO_GLUTAMINE_METABOLIC_PROCESS	GO_GLUTAMINE_METABOLIC_PROCESS		22	0.47974	1.47351	0.066778	0.225222	1	3824	tags=32%, list=11%, signal=36%
GO_MITOTIC_CYTOKINESIS	GO_MITOTIC_CYTOKINESIS		31	0.521003	1.47327	0.115163	0.2246	1	4104	tags=45%, list=12%, signal=51%
GO_REGULATION_OF_DNA_REPAIR	GO_REGULATION_OF_DNA_REPAIR		70	0.433586	1.47253	0.0744681	0.224712	1	2924	tags=29%, list=9%, signal=31%
GO_REGULATION_OF_GENE_EXPRESSION_EPIGENETIC	GO_REGULATION_OF_GENE_EXPRESSION_EPIGENETIC		205	0.365877	1.47154	0.0703259	0.225148	1	5797	tags=35%, list=17%, signal=42%
GO_MITOCHONDRIAL_GENOME_MAINTENANCE	GO_MITOCHONDRIAL_GENOME_MAINTENANCE		21	0.509225	1.46938	0.0601093	0.227239	1	6090	tags=52%, list=18%, signal=64%
GO_POSITIVE_REGULATION_OF_NUCLEASE_ACTIVITY	GO_POSITIVE_REGULATION_OF_NUCLEASE_ACTIVITY		15	0.55303	1.46921	0.0810313	0.226533	1	2865	tags=33%, list=9%, signal=36%
GO_NONRIBOSOMAL_PEPTIDE_BIOSYNTHETIC_PROCESS	GO_NONRIBOSOMAL_PEPTIDE_BIOSYNTHETIC_PROCESS		17	0.572233	1.46875	0.0715474	0.226242	1	5664	tags=41%, list=17%, signal=50%
GO_MEMBRANE_PROTEIN_ECTODOMAIN_PROTEOLYSIS	GO_MEMBRANE_PROTEIN_ECTODOMAIN_PROTEOLYSIS		21	0.507876	1.46809	0.0644007	0.226285	1	3532	tags=33%, list=11%, signal=37%
GO_ENDOPLASMIC_RETICULUM_TO_CYTOSOL_TRANSPORT	GO_ENDOPLASMIC_RETICULUM_TO_CYTOSOL_TRANSPORT		22	0.519838	1.46775	0.0790378	0.225862	1	3004	tags=36%, list=9%, signal=40%
GO_REGULATION_OF_TELOMERASE_ACTIVITY	GO_REGULATION_OF_TELOMERASE_ACTIVITY		42	0.444365	1.46748	0.0551601	0.225374	1	2924	tags=33%, list=9%, signal=36%
GO_REGULATION_OF_MICROTUBULE_BASED_PROCESS	GO_REGULATION_OF_MICROTUBULE_BASED_PROCESS		227	0.394642	1.46184	0.0815603	0.23283	1	3064	tags=27%, list=9%, signal=30%
GO_GLYCOPROTEIN_CATABOLIC_PROCESS	GO_GLYCOPROTEIN_CATABOLIC_PROCESS		15	0.532282	1.4573	0.0871632	0.238622	1	5116	tags=47%, list=15%, signal=55%
GO_DNA_REPLICATION_DEPENDENT_NUCLEOSOME_ORGANIZATION	GO_DNA_REPLICATION_DEPENDENT_NUCLEOSOME_ORGANIZATION		31	0.591934	1.4544	0.061674	0.241818	1	5791	tags=45%, list=17%, signal=55%
GO_DNA_REPLICATION_DEPENDENT_NUCLEOSOME_ASSEMBLY	GO_DNA_REPLICATION_DEPENDENT_NUCLEOSOME_ASSEMBLY		31	0.591934	1.4544	0.061674	0.240854	1	5791	tags=45%, list=17%, signal=55%
GO_MICROTUBULE_ORGANIZING_CENTER_ORGANIZATION	GO_MICROTUBULE_ORGANIZING_CENTER_ORGANIZATION		81	0.42441	1.45394	0.110307	0.240545	1	2932	tags=27%, list=9%, signal=30%
GO_ARP2_3_COMPLEX_MEDIATED_ACTIN_NUCLEATION	GO_ARP2_3_COMPLEX_MEDIATED_ACTIN_NUCLEATION		18	0.502289	1.45287	0.0902655	0.241156	1	8214	tags=67%, list=25%, signal=88%
GO_REGULATION_OF_MICROTUBULE_POLYMERIZATION_OR_DEPOLYMERIZATION	GO_REGULATION_OF_MICROTUBULE_POLYMERIZATION_OR_DEPOLYMERIZATION		165	0.40176	1.45215	0.0894161	0.241241	1	3460	tags=29%, list=10%, signal=32%
GO_ANTIGEN_PROCESSING_AND_PRESENTATION_OF_EXOGENOUS_PEPTIDE_ANTIGEN_VIA_MHC_CLASS_I	GO_ANTIGEN_PROCESSING_AND_PRESENTATION_OF_EXOGENOUS_PEPTIDE_ANTIGEN_VIA_MHC_CLASS_I		65	0.560426	1.44791	0.141791	0.246537	1	10460	tags=68%, list=31%, signal=99%
GO_PROTEIN_DEPOLYMERIZATION	GO_PROTEIN_DEPOLYMERIZATION		23	0.486875	1.44474	0.0990991	0.250286	1	1523	tags=30%, list=5%, signal=32%
GO_IRE1_MEDIATED_UNFOLDED_PROTEIN_RESPONSE	GO_IRE1_MEDIATED_UNFOLDED_PROTEIN_RESPONSE		53	0.462596	1.44353	0.105066	0.251113	1	4180	tags=47%, list=13%, signal=54%
GO_TRANSLATIONAL_ELONGATION	GO_TRANSLATIONAL_ELONGATION		110	0.512151	1.44272	0.142315	0.251419	1	7781	tags=56%, list=23%, signal=73%
GO_GLUTAMINE_FAMILY_AMINO_ACID_BIOSYNTHETIC_PROCESS	GO_GLUTAMINE_FAMILY_AMINO_ACID_BIOSYNTHETIC_PROCESS		20	0.500648	1.44131	0.0709677	0.252605	1	6425	tags=45%, list=19%, signal=56%
GO_REGULATION_OF_CHROMATIN_SILENCING	GO_REGULATION_OF_CHROMATIN_SILENCING		21	0.51415	1.43962	0.122137	0.254072	1	2656	tags=38%, list=8%, signal=41%
GO_PYRIMIDINE_NUCLEOBASE_METABOLIC_PROCESS	GO_PYRIMIDINE_NUCLEOBASE_METABOLIC_PROCESS		19	0.512039	1.43328	0.101968	0.262628	1	3583	tags=37%, list=11%, signal=41%
GO_MACROMOLECULE_METHYLATION	GO_MACROMOLECULE_METHYLATION		176	0.361089	1.43323	0.0564103	0.261696	1	6292	tags=37%, list=19%, signal=45%
GO_REGULATION_OF_CHROMOSOME_ORGANIZATION	GO_REGULATION_OF_CHROMOSOME_ORGANIZATION		264	0.357324	1.42746	0.0755712	0.269575	1	4809	tags=31%, list=14%, signal=36%
GO_NON_RECOMBINATIONAL_REPAIR	GO_NON_RECOMBINATIONAL_REPAIR		68	0.416163	1.42687	0.111693	0.2695	1	5444	tags=37%, list=16%, signal=44%
GO_NEGATIVE_REGULATION_OF_DNA_RECOMBINATION	GO_NEGATIVE_REGULATION_OF_DNA_RECOMBINATION		15	0.533595	1.42671	0.0982987	0.268706	1	1112	tags=27%, list=3%, signal=28%
GO_L_ALPHA_AMINO_ACID_TRANSMEMBRANE_TRANSPORT	GO_L_ALPHA_AMINO_ACID_TRANSMEMBRANE_TRANSPORT		31	0.434497	1.42613	0.0654762	0.26858	1	4113	tags=26%, list=12%, signal=29%
GO_REGULATION_OF_CYCLIN_DEPENDENT_PROTEIN_KINASE_ACTIVITY	GO_REGULATION_OF_CYCLIN_DEPENDENT_PROTEIN_KINASE_ACTIVITY		94	0.377767	1.42374	0.0592105	0.27123	1	3846	tags=33%, list=12%, signal=37%
GO_POSITIVE_REGULATION_OF_GENE_EXPRESSION_EPIGENETIC	GO_POSITIVE_REGULATION_OF_GENE_EXPRESSION_EPIGENETIC		75	0.405228	1.4237	0.0950156	0.270304	1	5963	tags=35%, list=18%, signal=42%
GO_RNA_SPLICING	GO_RNA_SPLICING		346	0.38881	1.42198	0.128906	0.272034	1	6169	tags=36%, list=19%, signal=43%
GO_MATURATION_OF_SSU_RRNA	GO_MATURATION_OF_SSU_RRNA		40	0.528339	1.42091	0.116761	0.272757	1	9421	tags=65%, list=28%, signal=91%
GO_ZINC_II_ION_TRANSPORT	GO_ZINC_II_ION_TRANSPORT		26	0.487263	1.41998	0.0833333	0.273191	1	7323	tags=46%, list=22%, signal=59%
GO_REGULATION_OF_TELOMERE_MAINTENANCE	GO_REGULATION_OF_TELOMERE_MAINTENANCE		66	0.416329	1.4152	0.09839	0.279805	1	3876	tags=33%, list=12%, signal=38%
GO_N_GLYCAN_PROCESSING	GO_N_GLYCAN_PROCESSING		19	0.483591	1.41504	0.0846395	0.279061	1	3509	tags=26%, list=11%, signal=29%
GO_NUCLEOTIDE_SUGAR_BIOSYNTHETIC_PROCESS	GO_NUCLEOTIDE_SUGAR_BIOSYNTHETIC_PROCESS		19	0.522591	1.41275	0.116638	0.281889	1	6027	tags=53%, list=18%, signal=64%
GO_PREASSEMBLY_OF_GPI_ANCHOR_IN_ER_MEMBRANE	GO_PREASSEMBLY_OF_GPI_ANCHOR_IN_ER_MEMBRANE		15	0.537393	1.41179	0.109023	0.282424	1	7390	tags=53%, list=22%, signal=69%
GO_MULTI_ORGANISM_LOCALIZATION	GO_MULTI_ORGANISM_LOCALIZATION		65	0.440163	1.41158	0.120229	0.281731	1	4695	tags=35%, list=14%, signal=41%
GO_MULTI_ORGANISM_TRANSPORT	GO_MULTI_ORGANISM_TRANSPORT		65	0.440163	1.41158	0.120229	0.280713	1	4695	tags=35%, list=14%, signal=41%
GO_POSITIVE_REGULATION_OF_CELL_CYCLE	GO_POSITIVE_REGULATION_OF_CELL_CYCLE		309	0.34648	1.41142	0.0791246	0.279952	1	3846	tags=27%, list=12%, signal=30%
GO_TRANSCRIPTION_COUPLED_NUCLEOTIDE_EXCISION_REPAIR	GO_TRANSCRIPTION_COUPLED_NUCLEOTIDE_EXCISION_REPAIR		72	0.445962	1.41064	0.137864	0.280228	1	3829	tags=33%, list=12%, signal=38%
GO_POSITIVE_REGULATION_OF_TELOMERE_CAPPING	GO_POSITIVE_REGULATION_OF_TELOMERE_CAPPING		15	0.515641	1.41025	0.0894161	0.279854	1	2888	tags=33%, list=9%, signal=36%
GO_PEPTIDYL_LYSINE_MODIFICATION	GO_PEPTIDYL_LYSINE_MODIFICATION		282	0.358221	1.40993	0.101083	0.279379	1	5563	tags=33%, list=17%, signal=40%
GO_POSITIVE_REGULATION_OF_CHROMOSOME_ORGANIZATION	GO_POSITIVE_REGULATION_OF_CHROMOSOME_ORGANIZATION		142	0.356989	1.40963	0.0740103	0.278854	1	4809	tags=32%, list=14%, signal=38%
GO_COFACTOR_TRANSPORT	GO_COFACTOR_TRANSPORT		26	0.434717	1.40702	0.066879	0.282001	1	3688	tags=31%, list=11%, signal=35%
GO_NEGATIVE_REGULATION_OF_MRNA_SPLICING_VIA_SPLICEOSOME	GO_NEGATIVE_REGULATION_OF_MRNA_SPLICING_VIA_SPLICEOSOME		19	0.550796	1.39946	0.145161	0.292871	1	5674	tags=42%, list=17%, signal=51%
GO_RESPONSE_TO_TESTOSTERONE	GO_RESPONSE_TO_TESTOSTERONE		38	0.416342	1.39931	0.0868307	0.292107	1	3985	tags=32%, list=12%, signal=36%
GO_AMINO_ACID_TRANSMEMBRANE_TRANSPORT	GO_AMINO_ACID_TRANSMEMBRANE_TRANSPORT		65	0.371561	1.3964	0.0741259	0.295684	1	7658	tags=34%, list=23%, signal=44%
GO_RNA_PHOSPHODIESTER_BOND_HYDROLYSIS_EXONUCLEOLYTIC	GO_RNA_PHOSPHODIESTER_BOND_HYDROLYSIS_EXONUCLEOLYTIC		33	0.44686	1.39554	0.0940326	0.296075	1	7625	tags=42%, list=23%, signal=55%
GO_POSITIVE_REGULATION_OF_LIGASE_ACTIVITY	GO_POSITIVE_REGULATION_OF_LIGASE_ACTIVITY		106	0.438305	1.39524	0.153846	0.295547	1	5216	tags=39%, list=16%, signal=46%
GO_CELLULAR_MODIFIED_AMINO_ACID_BIOSYNTHETIC_PROCESS	GO_CELLULAR_MODIFIED_AMINO_ACID_BIOSYNTHETIC_PROCESS		53	0.429693	1.39467	0.107256	0.295423	1	5664	tags=36%, list=17%, signal=43%
GO_POSITIVE_REGULATION_OF_NUCLEAR_DIVISION	GO_POSITIVE_REGULATION_OF_NUCLEAR_DIVISION		58	0.380893	1.39433	0.0954693	0.294993	1	2216	tags=19%, list=7%, signal=20%
GO_PYRIMIDINE_CONTAINING_COMPOUND_CATABOLIC_PROCESS	GO_PYRIMIDINE_CONTAINING_COMPOUND_CATABOLIC_PROCESS		30	0.420377	1.39431	0.0832025	0.293997	1	7360	tags=40%, list=22%, signal=51%
GO_NUCLEAR_ENVELOPE_ORGANIZATION	GO_NUCLEAR_ENVELOPE_ORGANIZATION		75	0.422302	1.3933	0.131274	0.294582	1	3441	tags=32%, list=10%, signal=36%
GO_CELLULAR_COMPONENT_DISASSEMBLY	GO_CELLULAR_COMPONENT_DISASSEMBLY		493	0.336972	1.39309	0.0927152	0.293897	1	6625	tags=36%, list=20%, signal=44%
GO_NEGATIVE_REGULATION_OF_CHROMOSOME_ORGANIZATION	GO_NEGATIVE_REGULATION_OF_CHROMOSOME_ORGANIZATION		93	0.401235	1.39119	0.121269	0.295959	1	4465	tags=33%, list=13%, signal=38%
GO_NUCLEOTIDE_SUGAR_METABOLIC_PROCESS	GO_NUCLEOTIDE_SUGAR_METABOLIC_PROCESS		33	0.452419	1.39034	0.0978078	0.296329	1	6215	tags=48%, list=19%, signal=60%
GO_CYTOKINESIS	GO_CYTOKINESIS		81	0.410653	1.3899	0.123574	0.296003	1	2727	tags=28%, list=8%, signal=31%
GO_PIGMENT_BIOSYNTHETIC_PROCESS	GO_PIGMENT_BIOSYNTHETIC_PROCESS		46	0.417842	1.38946	0.0928	0.295707	1	7323	tags=41%, list=22%, signal=53%
GO_NCRNA_PROCESSING	GO_NCRNA_PROCESSING		364	0.445822	1.38784	0.161905	0.297207	1	5648	tags=38%, list=17%, signal=45%
GO_NUCLEOBASE_METABOLIC_PROCESS	GO_NUCLEOBASE_METABOLIC_PROCESS		38	0.461288	1.38744	0.138112	0.296934	1	3583	tags=32%, list=11%, signal=35%
GO_LIPOPROTEIN_BIOSYNTHETIC_PROCESS	GO_LIPOPROTEIN_BIOSYNTHETIC_PROCESS		83	0.364228	1.38726	0.0762712	0.296239	1	7597	tags=37%, list=23%, signal=48%
GO_REGULATION_OF_CELL_CYCLE_CHECKPOINT	GO_REGULATION_OF_CELL_CYCLE_CHECKPOINT		27	0.478417	1.38539	0.134991	0.298233	1	4568	tags=41%, list=14%, signal=47%
GO_POSITIVE_REGULATION_OF_MITOTIC_CELL_CYCLE	GO_POSITIVE_REGULATION_OF_MITOTIC_CELL_CYCLE		119	0.373049	1.38348	0.125628	0.300246	1	3846	tags=28%, list=12%, signal=31%
GO_MATURATION_OF_SSU_RRNA_FROM_TRICISTRONIC_RRNA_TRANSCRIPT_SSU_RRNA_5_8S_RRNA_LSU_RRNA_	GO_MATURATION_OF_SSU_RRNA_FROM_TRICISTRONIC_RRNA_TRANSCRIPT_SSU_RRNA_5_8S_RRNA_LSU_RRNA_		33	0.53469	1.38313	0.154982	0.299846	1	9421	tags=64%, list=28%, signal=89%
GO_REGULATION_OF_MITOCHONDRIAL_OUTER_MEMBRANE_PERMEABILIZATION_INVOLVED_IN_APOPTOTIC_SIGNALING_PATHWAY	GO_REGULATION_OF_MITOCHONDRIAL_OUTER_MEMBRANE_PERMEABILIZATION_INVOLVED_IN_APOPTOTIC_SIGNALING_PATHWAY		42	0.446713	1.38196	0.132463	0.300733	1	5525	tags=45%, list=17%, signal=54%
GO_REGULATION_OF_RESPONSE_TO_DNA_DAMAGE_STIMULUS	GO_REGULATION_OF_RESPONSE_TO_DNA_DAMAGE_STIMULUS		136	0.35678	1.38194	0.08	0.299777	1	2924	tags=25%, list=9%, signal=27%
GO_REGULATION_OF_LIGASE_ACTIVITY	GO_REGULATION_OF_LIGASE_ACTIVITY		126	0.42082	1.37961	0.149533	0.30258	1	3530	tags=33%, list=11%, signal=37%
GO_METALLO_SULFUR_CLUSTER_ASSEMBLY	GO_METALLO_SULFUR_CLUSTER_ASSEMBLY		18	0.533739	1.3794	0.135338	0.301932	1	6942	tags=61%, list=21%, signal=77%
GO_IRON_SULFUR_CLUSTER_ASSEMBLY	GO_IRON_SULFUR_CLUSTER_ASSEMBLY		18	0.533739	1.3794	0.135338	0.300952	1	6942	tags=61%, list=21%, signal=77%
GO_REGULATION_OF_GENE_SILENCING	GO_REGULATION_OF_GENE_SILENCING		50	0.399768	1.37939	0.137153	0.299997	1	2884	tags=26%, list=9%, signal=28%
GO_MRNA_PROCESSING	GO_MRNA_PROCESSING		403	0.360552	1.37873	0.138258	0.300139	1	6189	tags=34%, list=19%, signal=41%
GO_G2_DNA_DAMAGE_CHECKPOINT	GO_G2_DNA_DAMAGE_CHECKPOINT		33	0.435247	1.37842	0.118794	0.29969	1	1577	tags=27%, list=5%, signal=29%
GO_CELLULAR_RESPONSE_TO_TOPOLOGICALLY_INCORRECT_PROTEIN	GO_CELLULAR_RESPONSE_TO_TOPOLOGICALLY_INCORRECT_PROTEIN		116	0.376548	1.3765	0.116438	0.301752	1	4180	tags=36%, list=13%, signal=41%
GO_SIGNAL_TRANSDUCTION_BY_P53_CLASS_MEDIATOR	GO_SIGNAL_TRANSDUCTION_BY_P53_CLASS_MEDIATOR		120	0.375714	1.37574	0.102389	0.302006	1	5604	tags=37%, list=17%, signal=44%
GO_NUCLEUS_ORGANIZATION	GO_NUCLEUS_ORGANIZATION		124	0.374652	1.37535	0.127341	0.301703	1	3441	tags=28%, list=10%, signal=31%
GO_NUCLEOTIDE_PHOSPHORYLATION	GO_NUCLEOTIDE_PHOSPHORYLATION		57	0.437555	1.37406	0.146465	0.302769	1	5081	tags=37%, list=15%, signal=43%
GO_ALPHA_AMINO_ACID_BIOSYNTHETIC_PROCESS	GO_ALPHA_AMINO_ACID_BIOSYNTHETIC_PROCESS		77	0.389543	1.37396	0.12381	0.301964	1	6503	tags=35%, list=20%, signal=43%
GO_INNATE_IMMUNE_RESPONSE_IN_MUCOSA	GO_INNATE_IMMUNE_RESPONSE_IN_MUCOSA		19	0.519883	1.37327	0.128936	0.302024	1	9143	tags=42%, list=27%, signal=58%
GO_REGULATION_OF_CENTROSOME_DUPLICATION	GO_REGULATION_OF_CENTROSOME_DUPLICATION		31	0.457226	1.37257	0.128913	0.302141	1	1845	tags=26%, list=6%, signal=27%
GO_REGULATION_OF_ANION_TRANSMEMBRANE_TRANSPORT	GO_REGULATION_OF_ANION_TRANSMEMBRANE_TRANSPORT		28	0.40166	1.36823	0.112903	0.308237	1	3736	tags=21%, list=11%, signal=24%
GO_NEGATIVE_REGULATION_OF_TELOMERASE_ACTIVITY	GO_NEGATIVE_REGULATION_OF_TELOMERASE_ACTIVITY		15	0.489174	1.36799	0.118299	0.307673	1	2924	tags=33%, list=9%, signal=37%
GO_REGULATION_OF_TYPE_I_INTERFERON_MEDIATED_SIGNALING_PATHWAY	GO_REGULATION_OF_TYPE_I_INTERFERON_MEDIATED_SIGNALING_PATHWAY		26	0.466866	1.36513	0.142367	0.311401	1	5810	tags=42%, list=17%, signal=51%
GO_BINDING_OF_SPERM_TO_ZONA_PELLUCIDA	GO_BINDING_OF_SPERM_TO_ZONA_PELLUCIDA		29	0.414263	1.36479	0.105691	0.310987	1	3542	tags=28%, list=11%, signal=31%
GO_POSITIVE_REGULATION_OF_DNA_REPLICATION	GO_POSITIVE_REGULATION_OF_DNA_REPLICATION		85	0.378277	1.3638	0.108108	0.311624	1	3052	tags=28%, list=9%, signal=31%
GO__DE_NOVO_PROTEIN_FOLDING	GO__DE_NOVO_PROTEIN_FOLDING		17	0.533129	1.36191	0.156305	0.313703	1	8120	tags=53%, list=24%, signal=70%
GO_POSITIVE_REGULATION_OF_PROTEIN_MODIFICATION_BY_SMALL_PROTEIN_CONJUGATION_OR_REMOVAL	GO_POSITIVE_REGULATION_OF_PROTEIN_MODIFICATION_BY_SMALL_PROTEIN_CONJUGATION_OR_REMOVAL		188	0.376467	1.36169	0.147273	0.313103	1	5216	tags=36%, list=16%, signal=42%
GO_BLASTOCYST_GROWTH	GO_BLASTOCYST_GROWTH		15	0.525424	1.35854	0.15283	0.317248	1	1109	tags=40%, list=3%, signal=41%
GO_NEGATIVE_REGULATION_OF_PROTEIN_COMPLEX_DISASSEMBLY	GO_NEGATIVE_REGULATION_OF_PROTEIN_COMPLEX_DISASSEMBLY		156	0.365073	1.35691	0.143363	0.319035	1	3460	tags=27%, list=10%, signal=30%
GO_REGULATION_OF_HISTONE_METHYLATION	GO_REGULATION_OF_HISTONE_METHYLATION		51	0.383674	1.35636	0.129534	0.318973	1	4809	tags=35%, list=14%, signal=41%
GO_PROTEIN_PEPTIDYL_PROLYL_ISOMERIZATION	GO_PROTEIN_PEPTIDYL_PROLYL_ISOMERIZATION		36	0.43249	1.35524	0.123878	0.319859	1	3485	tags=33%, list=10%, signal=37%
GO_REGULATION_OF_MITOPHAGY	GO_REGULATION_OF_MITOPHAGY		41	0.40691	1.35402	0.111111	0.320871	1	5994	tags=39%, list=18%, signal=48%
GO_GLYCERALDEHYDE_3_PHOSPHATE_METABOLIC_PROCESS	GO_GLYCERALDEHYDE_3_PHOSPHATE_METABOLIC_PROCESS		16	0.529478	1.35214	0.166107	0.323004	1	5730	tags=38%, list=17%, signal=45%
GO_NEGATIVE_REGULATION_OF_CELL_CYCLE_G1_S_PHASE_TRANSITION	GO_NEGATIVE_REGULATION_OF_CELL_CYCLE_G1_S_PHASE_TRANSITION		92	0.375214	1.3519	0.111111	0.322404	1	2413	tags=27%, list=7%, signal=29%
GO_PROTEIN_PALMITOYLATION	GO_PROTEIN_PALMITOYLATION		23	0.43958	1.35132	0.135088	0.322417	1	3344	tags=35%, list=10%, signal=39%
GO_V_D_J_RECOMBINATION	GO_V_D_J_RECOMBINATION		15	0.496544	1.34544	0.153322	0.331124	1	6203	tags=40%, list=19%, signal=49%
GO_SPLICEOSOMAL_COMPLEX_ASSEMBLY	GO_SPLICEOSOMAL_COMPLEX_ASSEMBLY		52	0.421429	1.34467	0.122371	0.331411	1	6659	tags=46%, list=20%, signal=58%
GO_CELLULAR_METABOLIC_COMPOUND_SALVAGE	GO_CELLULAR_METABOLIC_COMPOUND_SALVAGE		36	0.439006	1.34465	0.12892	0.330465	1	5760	tags=39%, list=17%, signal=47%
GO_RESPONSE_TO_X_RAY	GO_RESPONSE_TO_X_RAY		30	0.452641	1.3445	0.165756	0.32978	1	6058	tags=37%, list=18%, signal=45%
GO_CELL_CYCLE_G2_M_PHASE_TRANSITION	GO_CELL_CYCLE_G2_M_PHASE_TRANSITION		134	0.389056	1.34283	0.155268	0.331548	1	2932	tags=28%, list=9%, signal=31%
GO_PROTEIN_INSERTION_INTO_MEMBRANE	GO_PROTEIN_INSERTION_INTO_MEMBRANE		21	0.437964	1.34263	0.14188	0.330904	1	6023	tags=48%, list=18%, signal=58%
GO_REGULATION_OF_ESTABLISHMENT_OF_PROTEIN_LOCALIZATION_TO_MITOCHONDRION	GO_REGULATION_OF_ESTABLISHMENT_OF_PROTEIN_LOCALIZATION_TO_MITOCHONDRION		122	0.336901	1.34181	0.0912106	0.331238	1	5994	tags=34%, list=18%, signal=41%
GO_RIBONUCLEOSIDE_BISPHOSPHATE_BIOSYNTHETIC_PROCESS	GO_RIBONUCLEOSIDE_BISPHOSPHATE_BIOSYNTHETIC_PROCESS		17	0.469077	1.33755	0.122314	0.337194	1	7395	tags=47%, list=22%, signal=60%
GO_PURINE_NUCLEOSIDE_BISPHOSPHATE_BIOSYNTHETIC_PROCESS	GO_PURINE_NUCLEOSIDE_BISPHOSPHATE_BIOSYNTHETIC_PROCESS		17	0.469077	1.33755	0.122314	0.336208	1	7395	tags=47%, list=22%, signal=60%
GO_NUCLEOSIDE_BISPHOSPHATE_BIOSYNTHETIC_PROCESS	GO_NUCLEOSIDE_BISPHOSPHATE_BIOSYNTHETIC_PROCESS		17	0.469077	1.33755	0.122314	0.335228	1	7395	tags=47%, list=22%, signal=60%
GO_POSITIVE_REGULATION_OF_CELL_CYCLE_PHASE_TRANSITION	GO_POSITIVE_REGULATION_OF_CELL_CYCLE_PHASE_TRANSITION		67	0.386348	1.33602	0.144876	0.336817	1	1950	tags=22%, list=6%, signal=24%
GO_REGULATION_OF_PROTEIN_TARGETING_TO_MITOCHONDRION	GO_REGULATION_OF_PROTEIN_TARGETING_TO_MITOCHONDRION		92	0.33266	1.33557	0.0849057	0.336615	1	5994	tags=33%, list=18%, signal=40%
GO_FEMALE_MEIOTIC_DIVISION	GO_FEMALE_MEIOTIC_DIVISION		24	0.449816	1.33381	0.155932	0.338518	1	5151	tags=33%, list=15%, signal=39%
GO_PTERIDINE_CONTAINING_COMPOUND_BIOSYNTHETIC_PROCESS	GO_PTERIDINE_CONTAINING_COMPOUND_BIOSYNTHETIC_PROCESS		18	0.515844	1.33371	0.151292	0.337701	1	10365	tags=72%, list=31%, signal=105%
GO_REGULATION_OF_TRANSLATIONAL_FIDELITY	GO_REGULATION_OF_TRANSLATIONAL_FIDELITY		15	0.544897	1.33346	0.142336	0.337162	1	6245	tags=47%, list=19%, signal=57%
GO_SERINE_FAMILY_AMINO_ACID_BIOSYNTHETIC_PROCESS	GO_SERINE_FAMILY_AMINO_ACID_BIOSYNTHETIC_PROCESS		16	0.528501	1.33177	0.173175	0.339068	1	4215	tags=38%, list=13%, signal=43%
GO_ALDITOL_METABOLIC_PROCESS	GO_ALDITOL_METABOLIC_PROCESS		18	0.459526	1.33135	0.145763	0.338826	1	14579	tags=72%, list=44%, signal=129%
GO_NEGATIVE_REGULATION_OF_EPIDERMIS_DEVELOPMENT	GO_NEGATIVE_REGULATION_OF_EPIDERMIS_DEVELOPMENT		15	0.471664	1.33034	0.146643	0.339538	1	5990	tags=33%, list=18%, signal=41%
GO_POSITIVE_REGULATION_OF_RELEASE_OF_CYTOCHROME_C_FROM_MITOCHONDRIA	GO_POSITIVE_REGULATION_OF_RELEASE_OF_CYTOCHROME_C_FROM_MITOCHONDRIA		27	0.439525	1.32745	0.154783	0.343486	1	5025	tags=41%, list=15%, signal=48%
GO_NUCLEAR_TRANSPORT	GO_NUCLEAR_TRANSPORT		342	0.328563	1.32572	0.11828	0.345375	1	3441	tags=23%, list=10%, signal=25%
GO_GLUTAMINE_FAMILY_AMINO_ACID_METABOLIC_PROCESS	GO_GLUTAMINE_FAMILY_AMINO_ACID_METABOLIC_PROCESS		63	0.373644	1.32475	0.113019	0.346062	1	6425	tags=30%, list=19%, signal=37%
GO_PEPTIDYL_LYSINE_TRIMETHYLATION	GO_PEPTIDYL_LYSINE_TRIMETHYLATION		18	0.453847	1.32312	0.13945	0.347822	1	4638	tags=44%, list=14%, signal=52%
GO_RRNA_MODIFICATION	GO_RRNA_MODIFICATION		25	0.489962	1.32265	0.189091	0.347679	1	5388	tags=52%, list=16%, signal=62%
GO_NUCLEOSIDE_MONOPHOSPHATE_BIOSYNTHETIC_PROCESS	GO_NUCLEOSIDE_MONOPHOSPHATE_BIOSYNTHETIC_PROCESS		78	0.418823	1.31938	0.194545	0.352229	1	8454	tags=47%, list=25%, signal=63%
GO_TRIVALENT_INORGANIC_CATION_TRANSPORT	GO_TRIVALENT_INORGANIC_CATION_TRANSPORT		38	0.417716	1.31872	0.177172	0.352357	1	8576	tags=42%, list=26%, signal=57%
GO_FERRIC_IRON_TRANSPORT	GO_FERRIC_IRON_TRANSPORT		38	0.417716	1.31872	0.177172	0.351375	1	8576	tags=42%, list=26%, signal=57%
GO_IMMUNOGLOBULIN_PRODUCTION	GO_IMMUNOGLOBULIN_PRODUCTION		44	0.419215	1.31571	0.163445	0.355609	1	7808	tags=39%, list=23%, signal=50%
GO_ER_ASSOCIATED_UBIQUITIN_DEPENDENT_PROTEIN_CATABOLIC_PROCESS	GO_ER_ASSOCIATED_UBIQUITIN_DEPENDENT_PROTEIN_CATABOLIC_PROCESS		60	0.389819	1.31365	0.155556	0.358138	1	7524	tags=42%, list=23%, signal=54%
GO_DNA_TEMPLATED_TRANSCRIPTION_ELONGATION	GO_DNA_TEMPLATED_TRANSCRIPTION_ELONGATION		90	0.393768	1.31293	0.160681	0.358361	1	6189	tags=34%, list=19%, signal=42%
GO_TOXIN_TRANSPORT	GO_TOXIN_TRANSPORT		36	0.404098	1.31	0.148532	0.362267	1	1777	tags=22%, list=5%, signal=23%
GO_REGULATION_OF_TRANSLATION_IN_RESPONSE_TO_STRESS	GO_REGULATION_OF_TRANSLATION_IN_RESPONSE_TO_STRESS		19	0.461136	1.30912	0.175824	0.362777	1	2924	tags=26%, list=9%, signal=29%
GO_TELOMERE_MAINTENANCE_VIA_TELOMERE_LENGTHENING	GO_TELOMERE_MAINTENANCE_VIA_TELOMERE_LENGTHENING		26	0.442656	1.30713	0.140351	0.365195	1	5939	tags=42%, list=18%, signal=51%
GO_POSITIVE_REGULATION_OF_CELL_DIVISION	GO_POSITIVE_REGULATION_OF_CELL_DIVISION		118	0.331327	1.30453	0.150376	0.368775	1	3846	tags=22%, list=12%, signal=25%
GO_POSITIVE_REGULATION_OF_MITOCHONDRIAL_MEMBRANE_PERMEABILITY	GO_POSITIVE_REGULATION_OF_MITOCHONDRIAL_MEMBRANE_PERMEABILITY		18	0.448457	1.30151	0.157627	0.372952	1	4811	tags=44%, list=14%, signal=52%
GO_LIPOPROTEIN_METABOLIC_PROCESS	GO_LIPOPROTEIN_METABOLIC_PROCESS		121	0.316846	1.29662	0.116139	0.3804	1	5907	tags=31%, list=18%, signal=38%
GO_MEIOTIC_CHROMOSOME_SEGREGATION	GO_MEIOTIC_CHROMOSOME_SEGREGATION		52	0.387857	1.29284	0.168301	0.38615	1	3982	tags=25%, list=12%, signal=28%
GO_REGULATION_OF_PROTEIN_EXPORT_FROM_NUCLEUS	GO_REGULATION_OF_PROTEIN_EXPORT_FROM_NUCLEUS		33	0.417135	1.29246	0.164931	0.385847	1	2872	tags=27%, list=9%, signal=30%
GO_CHROMATIN_MODIFICATION	GO_CHROMATIN_MODIFICATION		499	0.317528	1.29165	0.156757	0.386308	1	6258	tags=34%, list=19%, signal=41%
GO_POSITIVE_REGULATION_OF_TELOMERASE_ACTIVITY	GO_POSITIVE_REGULATION_OF_TELOMERASE_ACTIVITY		28	0.419597	1.29129	0.162671	0.3859	1	2888	tags=32%, list=9%, signal=35%
GO_CHROMOSOME_ORGANIZATION_INVOLVED_IN_MEIOTIC_CELL_CYCLE	GO_CHROMOSOME_ORGANIZATION_INVOLVED_IN_MEIOTIC_CELL_CYCLE		41	0.393182	1.28988	0.166395	0.38733	1	7742	tags=39%, list=23%, signal=51%
GO_COFACTOR_BIOSYNTHETIC_PROCESS	GO_COFACTOR_BIOSYNTHETIC_PROCESS		156	0.347499	1.28854	0.153584	0.388618	1	7769	tags=39%, list=23%, signal=51%
GO_PURINE_RIBONUCLEOSIDE_BISPHOSPHATE_METABOLIC_PROCESS	GO_PURINE_RIBONUCLEOSIDE_BISPHOSPHATE_METABOLIC_PROCESS		20	0.449903	1.28704	0.182371	0.390317	1	6829	tags=40%, list=21%, signal=50%
GO_RESPONSE_TO_LEAD_ION	GO_RESPONSE_TO_LEAD_ION		19	0.441223	1.28643	0.185059	0.390371	1	1369	tags=26%, list=4%, signal=27%
GO_ECTODERMAL_PLACODE_DEVELOPMENT	GO_ECTODERMAL_PLACODE_DEVELOPMENT		15	0.488	1.28589	0.157895	0.390319	1	5000	tags=40%, list=15%, signal=47%
GO_ECTODERMAL_PLACODE_MORPHOGENESIS	GO_ECTODERMAL_PLACODE_MORPHOGENESIS		15	0.488	1.28589	0.157895	0.389286	1	5000	tags=40%, list=15%, signal=47%
GO_ECTODERMAL_PLACODE_FORMATION	GO_ECTODERMAL_PLACODE_FORMATION		15	0.488	1.28589	0.157895	0.388259	1	5000	tags=40%, list=15%, signal=47%
GO_CENTROSOME_DUPLICATION	GO_CENTROSOME_DUPLICATION		32	0.441844	1.28546	0.205323	0.388069	1	2932	tags=28%, list=9%, signal=31%
GO_CELLULAR_RESPONSE_TO_GAMMA_RADIATION	GO_CELLULAR_RESPONSE_TO_GAMMA_RADIATION		19	0.429724	1.28509	0.177391	0.387712	1	2808	tags=32%, list=8%, signal=34%
GO_MRNA_CLEAVAGE	GO_MRNA_CLEAVAGE		17	0.441885	1.28409	0.175701	0.388444	1	5349	tags=53%, list=16%, signal=63%
GO_ANTIGEN_PROCESSING_AND_PRESENTATION_OF_PEPTIDE_ANTIGEN_VIA_MHC_CLASS_I	GO_ANTIGEN_PROCESSING_AND_PRESENTATION_OF_PEPTIDE_ANTIGEN_VIA_MHC_CLASS_I		90	0.449033	1.28302	0.250916	0.389291	1	9007	tags=53%, list=27%, signal=73%
GO_RIBOSOMAL_SMALL_SUBUNIT_BIOGENESIS	GO_RIBOSOMAL_SMALL_SUBUNIT_BIOGENESIS		54	0.482901	1.28298	0.219885	0.388349	1	9421	tags=56%, list=28%, signal=77%
GO_POSITIVE_REGULATION_OF_MITOCHONDRION_ORGANIZATION	GO_POSITIVE_REGULATION_OF_MITOCHONDRION_ORGANIZATION		153	0.324221	1.28232	0.143092	0.388542	1	5525	tags=31%, list=17%, signal=37%
GO_NEGATIVE_REGULATION_OF_CELLULAR_PROTEIN_CATABOLIC_PROCESS	GO_NEGATIVE_REGULATION_OF_CELLULAR_PROTEIN_CATABOLIC_PROCESS		60	0.374181	1.28192	0.184701	0.388246	1	4465	tags=30%, list=13%, signal=35%
GO_NITROGEN_COMPOUND_TRANSPORT	GO_NITROGEN_COMPOUND_TRANSPORT		478	0.280611	1.28071	0.102672	0.389392	1	6550	tags=27%, list=20%, signal=33%
GO_CELL_REDOX_HOMEOSTASIS	GO_CELL_REDOX_HOMEOSTASIS		61	0.385509	1.27991	0.199005	0.38981	1	7058	tags=38%, list=21%, signal=48%
GO_NOTCH_RECEPTOR_PROCESSING	GO_NOTCH_RECEPTOR_PROCESSING		16	0.48132	1.27613	0.186777	0.395407	1	4862	tags=38%, list=15%, signal=44%
GO_POSITIVE_REGULATION_OF_VIRAL_TRANSCRIPTION	GO_POSITIVE_REGULATION_OF_VIRAL_TRANSCRIPTION		35	0.4171	1.27489	0.186594	0.396632	1	3829	tags=26%, list=12%, signal=29%
GO_GLYCOSYL_COMPOUND_BIOSYNTHETIC_PROCESS	GO_GLYCOSYL_COMPOUND_BIOSYNTHETIC_PROCESS		112	0.363563	1.27401	0.193043	0.397229	1	8187	tags=42%, list=25%, signal=55%
GO_NUCLEOSIDE_PHOSPHATE_BIOSYNTHETIC_PROCESS	GO_NUCLEOSIDE_PHOSPHATE_BIOSYNTHETIC_PROCESS		176	0.335226	1.2734	0.171901	0.397202	1	8187	tags=41%, list=25%, signal=55%
GO_L_AMINO_ACID_TRANSPORT	GO_L_AMINO_ACID_TRANSPORT		57	0.33664	1.27035	0.15188	0.401568	1	7169	tags=32%, list=22%, signal=40%
GO_REGULATION_OF_CELLULAR_AMINE_METABOLIC_PROCESS	GO_REGULATION_OF_CELLULAR_AMINE_METABOLIC_PROCESS		86	0.403554	1.27011	0.207018	0.400983	1	9007	tags=51%, list=27%, signal=70%
GO_REGULATION_OF_PROTEIN_MODIFICATION_BY_SMALL_PROTEIN_CONJUGATION_OR_REMOVAL	GO_REGULATION_OF_PROTEIN_MODIFICATION_BY_SMALL_PROTEIN_CONJUGATION_OR_REMOVAL		269	0.332918	1.26878	0.178571	0.402394	1	4437	tags=29%, list=13%, signal=34%
GO_PROTEIN_LOCALIZATION_TO_CYTOSKELETON	GO_PROTEIN_LOCALIZATION_TO_CYTOSKELETON		28	0.426018	1.26859	0.191606	0.401661	1	5229	tags=39%, list=16%, signal=47%
GO_NUCLEOTIDE_EXCISION_REPAIR_DNA_INCISION	GO_NUCLEOTIDE_EXCISION_REPAIR_DNA_INCISION		39	0.427733	1.26709	0.216319	0.403316	1	2641	tags=28%, list=8%, signal=31%
GO_MICROTUBULE_CYTOSKELETON_ORGANIZATION	GO_MICROTUBULE_CYTOSKELETON_ORGANIZATION		317	0.324153	1.26604	0.187075	0.40419	1	2932	tags=21%, list=9%, signal=23%
GO_HISTONE_H3_ACETYLATION	GO_HISTONE_H3_ACETYLATION		41	0.355959	1.26569	0.157801	0.403792	1	1502	tags=22%, list=5%, signal=23%
GO_NEGATIVE_REGULATION_OF_CELL_CYCLE	GO_NEGATIVE_REGULATION_OF_CELL_CYCLE		406	0.302358	1.26346	0.128926	0.406912	1	3867	tags=25%, list=12%, signal=28%
GO_REGULATION_OF_NUCLEASE_ACTIVITY	GO_REGULATION_OF_NUCLEASE_ACTIVITY		23	0.438548	1.26154	0.207619	0.40932	1	5009	tags=35%, list=15%, signal=41%
GO_CELLULAR_RESPONSE_TO_RADIATION	GO_CELLULAR_RESPONSE_TO_RADIATION		130	0.321852	1.26085	0.165017	0.409591	1	2865	tags=24%, list=9%, signal=26%
GO_NEGATIVE_REGULATION_OF_CHROMATIN_MODIFICATION	GO_NEGATIVE_REGULATION_OF_CHROMATIN_MODIFICATION		44	0.367608	1.26048	0.209059	0.409247	1	3181	tags=30%, list=10%, signal=33%
GO_POSITIVE_REGULATION_OF_VIRAL_PROCESS	GO_POSITIVE_REGULATION_OF_VIRAL_PROCESS		85	0.359567	1.25573	0.168478	0.416879	1	7188	tags=35%, list=22%, signal=45%
GO_CELLULAR_RESPONSE_TO_IONIZING_RADIATION	GO_CELLULAR_RESPONSE_TO_IONIZING_RADIATION		50	0.366103	1.2556	0.19823	0.41611	1	2808	tags=28%, list=8%, signal=31%
GO_TRANSCRIPTION_FROM_RNA_POLYMERASE_I_PROMOTER	GO_TRANSCRIPTION_FROM_RNA_POLYMERASE_I_PROMOTER		35	0.421542	1.25428	0.194393	0.417474	1	6932	tags=46%, list=21%, signal=58%
GO_TRANSCRIPTION_ELONGATION_FROM_RNA_POLYMERASE_II_PROMOTER	GO_TRANSCRIPTION_ELONGATION_FROM_RNA_POLYMERASE_II_PROMOTER		75	0.378523	1.25369	0.20075	0.417508	1	6189	tags=32%, list=19%, signal=39%
GO_POSITIVE_REGULATION_OF_HISTONE_METHYLATION	GO_POSITIVE_REGULATION_OF_HISTONE_METHYLATION		29	0.38599	1.25343	0.201077	0.416984	1	4638	tags=34%, list=14%, signal=40%
GO_NEGATIVE_REGULATION_OF_GENE_EXPRESSION_EPIGENETIC	GO_NEGATIVE_REGULATION_OF_GENE_EXPRESSION_EPIGENETIC		95	0.366174	1.25262	0.219092	0.417427	1	5797	tags=34%, list=17%, signal=41%
GO_REGULATION_OF_MITOCHONDRIAL_MEMBRANE_PERMEABILITY_INVOLVED_IN_APOPTOTIC_PROCESS	GO_REGULATION_OF_MITOCHONDRIAL_MEMBRANE_PERMEABILITY_INVOLVED_IN_APOPTOTIC_PROCESS		22	0.406524	1.25062	0.180103	0.42014	1	4811	tags=41%, list=14%, signal=48%
GO_PROTEASOMAL_PROTEIN_CATABOLIC_PROCESS	GO_PROTEASOMAL_PROTEIN_CATABOLIC_PROCESS		265	0.332008	1.24747	0.204461	0.42482	1	3790	tags=28%, list=11%, signal=31%
GO_INNER_MITOCHONDRIAL_MEMBRANE_ORGANIZATION	GO_INNER_MITOCHONDRIAL_MEMBRANE_ORGANIZATION		16	0.51664	1.24538	0.258126	0.427741	1	8960	tags=44%, list=27%, signal=60%
GO_REGULATION_OF_VIRAL_TRANSCRIPTION	GO_REGULATION_OF_VIRAL_TRANSCRIPTION		57	0.368407	1.24173	0.206774	0.433341	1	6431	tags=28%, list=19%, signal=35%
GO_REGULATION_OF_MITOCHONDRION_ORGANIZATION	GO_REGULATION_OF_MITOCHONDRION_ORGANIZATION		200	0.310862	1.23901	0.172471	0.437349	1	5525	tags=31%, list=17%, signal=37%
GO_NOSE_DEVELOPMENT	GO_NOSE_DEVELOPMENT		15	0.447462	1.23753	0.21978	0.439043	1	1776	tags=27%, list=5%, signal=28%
GO_REGULATION_OF_SPINDLE_ORGANIZATION	GO_REGULATION_OF_SPINDLE_ORGANIZATION		19	0.434378	1.23715	0.208015	0.438691	1	1598	tags=26%, list=5%, signal=28%
GO_MEMBRANE_LIPID_CATABOLIC_PROCESS	GO_MEMBRANE_LIPID_CATABOLIC_PROCESS		24	0.406261	1.23698	0.218354	0.437946	1	5598	tags=33%, list=17%, signal=40%
GO_NUCLEAR_IMPORT	GO_NUCLEAR_IMPORT		126	0.346269	1.23686	0.207679	0.437125	1	3441	tags=25%, list=10%, signal=27%
GO_CELL_DIFFERENTIATION_INVOLVED_IN_EMBRYONIC_PLACENTA_DEVELOPMENT	GO_CELL_DIFFERENTIATION_INVOLVED_IN_EMBRYONIC_PLACENTA_DEVELOPMENT		25	0.395617	1.23667	0.194828	0.436432	1	5456	tags=36%, list=16%, signal=43%
GO_MRNA_CIS_SPLICING_VIA_SPLICEOSOME	GO_MRNA_CIS_SPLICING_VIA_SPLICEOSOME		17	0.438785	1.23602	0.227704	0.436582	1	9252	tags=53%, list=28%, signal=73%
GO_CELLULAR_AMINO_ACID_BIOSYNTHETIC_PROCESS	GO_CELLULAR_AMINO_ACID_BIOSYNTHETIC_PROCESS		92	0.336856	1.23585	0.205837	0.435853	1	6503	tags=34%, list=20%, signal=42%
GO_POSITIVE_REGULATION_OF_RESPONSE_TO_DNA_DAMAGE_STIMULUS	GO_POSITIVE_REGULATION_OF_RESPONSE_TO_DNA_DAMAGE_STIMULUS		59	0.335537	1.23472	0.188291	0.43692	1	2030	tags=22%, list=6%, signal=23%
GO_RESPONSE_TO_UV	GO_RESPONSE_TO_UV		120	0.328061	1.23223	0.163265	0.440347	1	3335	tags=27%, list=10%, signal=30%
GO_NEGATIVE_REGULATION_OF_CYCLIN_DEPENDENT_PROTEIN_KINASE_ACTIVITY	GO_NEGATIVE_REGULATION_OF_CYCLIN_DEPENDENT_PROTEIN_KINASE_ACTIVITY		32	0.358885	1.23176	0.193182	0.440169	1	2429	tags=28%, list=7%, signal=30%
GO_ORGANOPHOSPHATE_BIOSYNTHETIC_PROCESS	GO_ORGANOPHOSPHATE_BIOSYNTHETIC_PROCESS		429	0.275567	1.23132	0.14881	0.439968	1	5323	tags=25%, list=16%, signal=30%
GO_REGULATION_OF_MEMBRANE_PERMEABILITY	GO_REGULATION_OF_MEMBRANE_PERMEABILITY		69	0.3555	1.22858	0.227848	0.443947	1	5525	tags=38%, list=17%, signal=45%
GO_POSITIVE_REGULATION_OF_TRANSLATIONAL_INITIATION	GO_POSITIVE_REGULATION_OF_TRANSLATIONAL_INITIATION		22	0.396089	1.22785	0.208621	0.444238	1	3265	tags=27%, list=10%, signal=30%
GO_PROTEIN_KINASE_C_SIGNALING	GO_PROTEIN_KINASE_C_SIGNALING		15	0.44367	1.22657	0.233276	0.445536	1	3846	tags=27%, list=12%, signal=30%
GO_REGULATION_OF_CELL_CYCLE_G1_S_PHASE_TRANSITION	GO_REGULATION_OF_CELL_CYCLE_G1_S_PHASE_TRANSITION		140	0.330506	1.22654	0.197279	0.444551	1	3756	tags=29%, list=11%, signal=32%
GO_ERAD_PATHWAY	GO_ERAD_PATHWAY		72	0.346926	1.22254	0.212341	0.450823	1	5430	tags=33%, list=16%, signal=40%
GO_PEPTIDYL_LYSINE_METHYLATION	GO_PEPTIDYL_LYSINE_METHYLATION		60	0.343532	1.2223	0.225403	0.45019	1	5061	tags=33%, list=15%, signal=39%
GO_NIK_NF_KAPPAB_SIGNALING	GO_NIK_NF_KAPPAB_SIGNALING		82	0.409305	1.22186	0.281132	0.449984	1	5114	tags=35%, list=15%, signal=42%
GO_COENZYME_BIOSYNTHETIC_PROCESS	GO_COENZYME_BIOSYNTHETIC_PROCESS		117	0.336091	1.22169	0.220137	0.449279	1	4800	tags=28%, list=14%, signal=33%
GO_HOMOLOGOUS_CHROMOSOME_SEGREGATION	GO_HOMOLOGOUS_CHROMOSOME_SEGREGATION		39	0.373601	1.22005	0.199688	0.451334	1	7742	tags=36%, list=23%, signal=47%
GO_CELLULAR_AMINO_ACID_METABOLIC_PROCESS	GO_CELLULAR_AMINO_ACID_METABOLIC_PROCESS		319	0.301461	1.21905	0.197183	0.45212	1	6193	tags=31%, list=19%, signal=37%
GO_NEGATIVE_REGULATION_OF_MEGAKARYOCYTE_DIFFERENTIATION	GO_NEGATIVE_REGULATION_OF_MEGAKARYOCYTE_DIFFERENTIATION		17	0.520265	1.21688	0.233196	0.45509	1	14878	tags=82%, list=45%, signal=149%
GO_POSITIVE_REGULATION_OF_DNA_REPAIR	GO_POSITIVE_REGULATION_OF_DNA_REPAIR		34	0.384633	1.21659	0.221837	0.454562	1	2030	tags=26%, list=6%, signal=28%
GO_RESPONSE_TO_ENDOPLASMIC_RETICULUM_STRESS	GO_RESPONSE_TO_ENDOPLASMIC_RETICULUM_STRESS		223	0.309716	1.21611	0.199653	0.454395	1	4192	tags=29%, list=13%, signal=33%
GO_POSITIVE_REGULATION_OF_INTERFERON_ALPHA_PRODUCTION	GO_POSITIVE_REGULATION_OF_INTERFERON_ALPHA_PRODUCTION		16	0.460897	1.21378	0.252073	0.457633	1	4263	tags=38%, list=13%, signal=43%
GO_POSITIVE_REGULATION_OF_LYMPHOCYTE_MIGRATION	GO_POSITIVE_REGULATION_OF_LYMPHOCYTE_MIGRATION		26	0.429957	1.21358	0.257364	0.456937	1	5777	tags=31%, list=17%, signal=37%
GO_PROTEIN_ACYLATION	GO_PROTEIN_ACYLATION		144	0.299839	1.21219	0.196918	0.458437	1	6644	tags=35%, list=20%, signal=44%
GO_GLUCOSE_CATABOLIC_PROCESS	GO_GLUCOSE_CATABOLIC_PROCESS		27	0.443057	1.20859	0.296429	0.464054	1	9044	tags=52%, list=27%, signal=71%
GO_HEME_BIOSYNTHETIC_PROCESS	GO_HEME_BIOSYNTHETIC_PROCESS		20	0.432493	1.20812	0.243523	0.463898	1	2861	tags=25%, list=9%, signal=27%
GO_DETECTION_OF_CHEMICAL_STIMULUS_INVOLVED_IN_SENSORY_PERCEPTION_OF_TASTE	GO_DETECTION_OF_CHEMICAL_STIMULUS_INVOLVED_IN_SENSORY_PERCEPTION_OF_TASTE		32	0.411827	1.20794	0.221311	0.463152	1	16959	tags=72%, list=51%, signal=147%
GO_RESPONSE_TO_TYPE_I_INTERFERON	GO_RESPONSE_TO_TYPE_I_INTERFERON		56	0.483203	1.20764	0.31215	0.462677	1	7266	tags=54%, list=22%, signal=68%
GO_POSITIVE_REGULATION_OF_CHROMATIN_MODIFICATION	GO_POSITIVE_REGULATION_OF_CHROMATIN_MODIFICATION		81	0.311866	1.20658	0.198664	0.463635	1	2924	tags=25%, list=9%, signal=27%
GO_REGULATION_OF_INTERFERON_ALPHA_PRODUCTION	GO_REGULATION_OF_INTERFERON_ALPHA_PRODUCTION		19	0.455696	1.20614	0.260943	0.463382	1	4263	tags=37%, list=13%, signal=42%
GO_ATP_GENERATION_FROM_ADP	GO_ATP_GENERATION_FROM_ADP		36	0.423872	1.20573	0.270364	0.46312	1	9278	tags=53%, list=28%, signal=73%
GO_MULTICELLULAR_ORGANISM_AGING	GO_MULTICELLULAR_ORGANISM_AGING		30	0.348869	1.20406	0.222741	0.465184	1	1378	tags=17%, list=4%, signal=17%
GO_PURINE_CONTAINING_COMPOUND_SALVAGE	GO_PURINE_CONTAINING_COMPOUND_SALVAGE		16	0.467637	1.20194	0.249123	0.468041	1	5760	tags=44%, list=17%, signal=53%
GO_NEGATIVE_REGULATION_OF_ORGANELLE_ORGANIZATION	GO_NEGATIVE_REGULATION_OF_ORGANELLE_ORGANIZATION		363	0.298329	1.20074	0.225641	0.469227	1	3471	tags=23%, list=10%, signal=25%
GO_PEPTIDYL_PROLINE_MODIFICATION	GO_PEPTIDYL_PROLINE_MODIFICATION		46	0.374777	1.19982	0.248252	0.469901	1	4910	tags=33%, list=15%, signal=38%
GO_RNA_DEPENDENT_DNA_BIOSYNTHETIC_PROCESS	GO_RNA_DEPENDENT_DNA_BIOSYNTHETIC_PROCESS		21	0.417684	1.19784	0.261628	0.472576	1	5939	tags=43%, list=18%, signal=52%
GO_REGULATION_OF_RNA_STABILITY	GO_REGULATION_OF_RNA_STABILITY		135	0.352581	1.1973	0.259048	0.472513	1	8131	tags=43%, list=24%, signal=57%
GO_POSTTRANSCRIPTIONAL_GENE_SILENCING	GO_POSTTRANSCRIPTIONAL_GENE_SILENCING		37	0.361178	1.19694	0.257463	0.472146	1	5596	tags=32%, list=17%, signal=39%
GO_DNA_DOUBLE_STRAND_BREAK_PROCESSING	GO_DNA_DOUBLE_STRAND_BREAK_PROCESSING		20	0.444153	1.19584	0.266667	0.473147	1	8963	tags=50%, list=27%, signal=68%
GO_DNA_METHYLATION_INVOLVED_IN_GAMETE_GENERATION	GO_DNA_METHYLATION_INVOLVED_IN_GAMETE_GENERATION		18	0.427172	1.19216	0.258647	0.479003	1	5819	tags=33%, list=17%, signal=40%
GO_REGULATION_OF_PROTEIN_COMPLEX_DISASSEMBLY	GO_REGULATION_OF_PROTEIN_COMPLEX_DISASSEMBLY		200	0.316116	1.19199	0.260105	0.478262	1	3460	tags=24%, list=10%, signal=27%
GO_TRANSITION_METAL_ION_TRANSPORT	GO_TRANSITION_METAL_ION_TRANSPORT		103	0.32339	1.19174	0.231231	0.477665	1	9067	tags=43%, list=27%, signal=59%
GO_ISOTYPE_SWITCHING	GO_ISOTYPE_SWITCHING		16	0.435439	1.18823	0.27256	0.483189	1	6403	tags=44%, list=19%, signal=54%
GO_SOMATIC_DIVERSIFICATION_OF_IMMUNOGLOBULINS_INVOLVED_IN_IMMUNE_RESPONSE	GO_SOMATIC_DIVERSIFICATION_OF_IMMUNOGLOBULINS_INVOLVED_IN_IMMUNE_RESPONSE		16	0.435439	1.18823	0.27256	0.482141	1	6403	tags=44%, list=19%, signal=54%
GO_SOMATIC_RECOMBINATION_OF_IMMUNOGLOBULIN_GENES_INVOLVED_IN_IMMUNE_RESPONSE	GO_SOMATIC_RECOMBINATION_OF_IMMUNOGLOBULIN_GENES_INVOLVED_IN_IMMUNE_RESPONSE		16	0.435439	1.18823	0.27256	0.481097	1	6403	tags=44%, list=19%, signal=54%
GO_MEMBRANE_PROTEIN_INTRACELLULAR_DOMAIN_PROTEOLYSIS	GO_MEMBRANE_PROTEIN_INTRACELLULAR_DOMAIN_PROTEOLYSIS		16	0.416238	1.1882	0.24911	0.480116	1	3532	tags=38%, list=11%, signal=42%
GO_FOLIC_ACID_CONTAINING_COMPOUND_METABOLIC_PROCESS	GO_FOLIC_ACID_CONTAINING_COMPOUND_METABOLIC_PROCESS		29	0.397075	1.18795	0.245033	0.479603	1	2771	tags=28%, list=8%, signal=30%
GO_RESPONSE_TO_TOPOLOGICALLY_INCORRECT_PROTEIN	GO_RESPONSE_TO_TOPOLOGICALLY_INCORRECT_PROTEIN		156	0.321107	1.18698	0.241611	0.480423	1	4180	tags=31%, list=13%, signal=35%
GO_MICROTUBULE_BASED_PROCESS	GO_MICROTUBULE_BASED_PROCESS		481	0.288997	1.18486	0.239482	0.483334	1	3639	tags=20%, list=11%, signal=22%
GO_PEPTIDYL_CYSTEINE_MODIFICATION	GO_PEPTIDYL_CYSTEINE_MODIFICATION		20	0.429649	1.18335	0.261905	0.485158	1	3506	tags=25%, list=11%, signal=28%
GO_HISTONE_H3_K4_METHYLATION	GO_HISTONE_H3_K4_METHYLATION		26	0.38035	1.18326	0.230072	0.484282	1	5823	tags=38%, list=18%, signal=47%
GO_NEGATIVE_REGULATION_OF_CYTOSKELETON_ORGANIZATION	GO_NEGATIVE_REGULATION_OF_CYTOSKELETON_ORGANIZATION		206	0.30475	1.18314	0.248731	0.483468	1	3460	tags=23%, list=10%, signal=26%
GO_PROTEIN_DEGLYCOSYLATION	GO_PROTEIN_DEGLYCOSYLATION		21	0.418359	1.18215	0.267399	0.484329	1	3549	tags=29%, list=11%, signal=32%
GO_GLYCOSYLATION	GO_GLYCOSYLATION		248	0.28477	1.18214	0.231563	0.483316	1	4638	tags=22%, list=14%, signal=26%
GO_COENZYME_METABOLIC_PROCESS	GO_COENZYME_METABOLIC_PROCESS		251	0.304689	1.18212	0.234528	0.482346	1	4800	tags=25%, list=14%, signal=29%
GO_NEGATIVE_REGULATION_OF_RESPONSE_TO_DNA_DAMAGE_STIMULUS	GO_NEGATIVE_REGULATION_OF_RESPONSE_TO_DNA_DAMAGE_STIMULUS		49	0.333994	1.18104	0.230889	0.483332	1	2352	tags=20%, list=7%, signal=22%
GO_HIGH_DENSITY_LIPOPROTEIN_PARTICLE_REMODELING	GO_HIGH_DENSITY_LIPOPROTEIN_PARTICLE_REMODELING		15	0.439372	1.18098	0.269113	0.482438	1	2743	tags=20%, list=8%, signal=22%
GO_REGULATION_OF_RELEASE_OF_CYTOCHROME_C_FROM_MITOCHONDRIA	GO_REGULATION_OF_RELEASE_OF_CYTOCHROME_C_FROM_MITOCHONDRIA		43	0.3664	1.1806	0.261667	0.482138	1	5025	tags=35%, list=15%, signal=41%
GO_ANTIGEN_PROCESSING_AND_PRESENTATION_OF_PEPTIDE_ANTIGEN	GO_ANTIGEN_PROCESSING_AND_PRESENTATION_OF_PEPTIDE_ANTIGEN		169	0.373118	1.17942	0.308958	0.483309	1	5219	tags=30%, list=16%, signal=36%
GO_MICROTUBULE_BASED_MOVEMENT	GO_MICROTUBULE_BASED_MOVEMENT		192	0.293909	1.17867	0.247173	0.483664	1	6158	tags=27%, list=19%, signal=32%
GO_RELEASE_OF_CYTOCHROME_C_FROM_MITOCHONDRIA	GO_RELEASE_OF_CYTOCHROME_C_FROM_MITOCHONDRIA		22	0.43821	1.17762	0.27379	0.484551	1	3614	tags=41%, list=11%, signal=46%
GO_SPERMATID_NUCLEUS_DIFFERENTIATION	GO_SPERMATID_NUCLEUS_DIFFERENTIATION		15	0.406039	1.1776	0.282143	0.483578	1	1637	tags=20%, list=5%, signal=21%
GO_COFACTOR_METABOLIC_PROCESS	GO_COFACTOR_METABOLIC_PROCESS		320	0.300258	1.17482	0.2411	0.487633	1	4800	tags=24%, list=14%, signal=27%
GO_NITROGEN_CYCLE_METABOLIC_PROCESS	GO_NITROGEN_CYCLE_METABOLIC_PROCESS		15	0.420207	1.1726	0.259314	0.490759	1	6927	tags=47%, list=21%, signal=59%
GO_POSITIVE_REGULATION_OF_PROTEIN_OLIGOMERIZATION	GO_POSITIVE_REGULATION_OF_PROTEIN_OLIGOMERIZATION		17	0.429077	1.17004	0.280844	0.494551	1	3709	tags=35%, list=11%, signal=40%
GO_NEGATIVE_REGULATION_OF_HISTONE_MODIFICATION	GO_NEGATIVE_REGULATION_OF_HISTONE_MODIFICATION		35	0.360514	1.16931	0.270548	0.49492	1	3181	tags=31%, list=10%, signal=35%
GO_NEGATIVE_REGULATION_OF_VIRAL_GENOME_REPLICATION	GO_NEGATIVE_REGULATION_OF_VIRAL_GENOME_REPLICATION		48	0.400782	1.16809	0.335017	0.496136	1	7565	tags=40%, list=23%, signal=51%
GO_PROTEIN_METHYLATION	GO_PROTEIN_METHYLATION		98	0.307918	1.16745	0.242017	0.496328	1	6568	tags=36%, list=20%, signal=44%
GO_PROTEIN_ALKYLATION	GO_PROTEIN_ALKYLATION		98	0.307918	1.16745	0.242017	0.495307	1	6568	tags=36%, list=20%, signal=44%
GO_POSITIVE_REGULATION_OF_CELL_CYCLE_G2_M_PHASE_TRANSITION	GO_POSITIVE_REGULATION_OF_CELL_CYCLE_G2_M_PHASE_TRANSITION		18	0.408242	1.1648	0.267951	0.499299	1	443	tags=17%, list=1%, signal=17%
GO_REGULATION_OF_ENDOPLASMIC_RETICULUM_UNFOLDED_PROTEIN_RESPONSE	GO_REGULATION_OF_ENDOPLASMIC_RETICULUM_UNFOLDED_PROTEIN_RESPONSE		25	0.387184	1.1637	0.247078	0.500328	1	3891	tags=40%, list=12%, signal=45%
GO_POSITIVE_REGULATION_OF_LYMPHOCYTE_APOPTOTIC_PROCESS	GO_POSITIVE_REGULATION_OF_LYMPHOCYTE_APOPTOTIC_PROCESS		19	0.411308	1.16341	0.283784	0.499856	1	4062	tags=26%, list=12%, signal=30%
GO_OOCYTE_MATURATION	GO_OOCYTE_MATURATION		18	0.403064	1.16091	0.266983	0.503633	1	3720	tags=33%, list=11%, signal=38%
GO_SPERM_MOTILITY	GO_SPERM_MOTILITY		40	0.331984	1.15982	0.276504	0.504672	1	13037	tags=58%, list=39%, signal=94%
GO_NEGATIVE_REGULATION_OF_TELOMERE_MAINTENANCE_VIA_TELOMERE_LENGTHENING	GO_NEGATIVE_REGULATION_OF_TELOMERE_MAINTENANCE_VIA_TELOMERE_LENGTHENING		17	0.42943	1.15939	0.297597	0.504432	1	3786	tags=29%, list=11%, signal=33%
GO_AXONEMAL_DYNEIN_COMPLEX_ASSEMBLY	GO_AXONEMAL_DYNEIN_COMPLEX_ASSEMBLY		17	0.438853	1.15852	0.30622	0.504963	1	8092	tags=41%, list=24%, signal=54%
GO_CELLULAR_RESPONSE_TO_INTERLEUKIN_4	GO_CELLULAR_RESPONSE_TO_INTERLEUKIN_4		24	0.388447	1.15767	0.287081	0.505447	1	2924	tags=25%, list=9%, signal=27%
GO_FATTY_ACYL_COA_METABOLIC_PROCESS	GO_FATTY_ACYL_COA_METABOLIC_PROCESS		48	0.336842	1.15708	0.261563	0.505518	1	4538	tags=25%, list=14%, signal=29%
GO_FOLIC_ACID_METABOLIC_PROCESS	GO_FOLIC_ACID_METABOLIC_PROCESS		18	0.432209	1.15628	0.285223	0.506012	1	10253	tags=67%, list=31%, signal=96%
GO_SYNAPSIS	GO_SYNAPSIS		30	0.35806	1.15285	0.261468	0.511573	1	7742	tags=37%, list=23%, signal=48%
GO_REGULATION_OF_T_CELL_MIGRATION	GO_REGULATION_OF_T_CELL_MIGRATION		24	0.400013	1.15264	0.30956	0.510956	1	5777	tags=33%, list=17%, signal=40%
GO_RESPONSE_TO_RADIATION	GO_RESPONSE_TO_RADIATION		386	0.265323	1.15087	0.223529	0.513258	1	3335	tags=20%, list=10%, signal=22%
GO_TETRAHYDROFOLATE_METABOLIC_PROCESS	GO_TETRAHYDROFOLATE_METABOLIC_PROCESS		21	0.42454	1.15065	0.299833	0.512644	1	2771	tags=33%, list=8%, signal=36%
GO_NEGATIVE_REGULATION_OF_RNA_SPLICING	GO_NEGATIVE_REGULATION_OF_RNA_SPLICING		24	0.423675	1.1499	0.30099	0.512972	1	5674	tags=33%, list=17%, signal=40%
GO_POST_TRANSLATIONAL_PROTEIN_MODIFICATION	GO_POST_TRANSLATIONAL_PROTEIN_MODIFICATION		34	0.359863	1.14872	0.260032	0.514197	1	9879	tags=47%, list=30%, signal=67%
GO_REGULATION_OF_RETINOIC_ACID_RECEPTOR_SIGNALING_PATHWAY	GO_REGULATION_OF_RETINOIC_ACID_RECEPTOR_SIGNALING_PATHWAY		17	0.397044	1.14805	0.276295	0.514478	1	470	tags=12%, list=1%, signal=12%
GO_POSITIVE_REGULATION_OF_MESONEPHROS_DEVELOPMENT	GO_POSITIVE_REGULATION_OF_MESONEPHROS_DEVELOPMENT		22	0.372821	1.14775	0.277941	0.514028	1	6408	tags=36%, list=19%, signal=45%
GO_COCHLEA_MORPHOGENESIS	GO_COCHLEA_MORPHOGENESIS		21	0.38988	1.14658	0.306525	0.51516	1	7188	tags=43%, list=22%, signal=55%
GO_PROTEIN_ACETYLATION	GO_PROTEIN_ACETYLATION		114	0.295582	1.14434	0.264957	0.518359	1	7630	tags=39%, list=23%, signal=51%
GO_NEGATIVE_REGULATION_OF_DNA_DEPENDENT_DNA_REPLICATION	GO_NEGATIVE_REGULATION_OF_DNA_DEPENDENT_DNA_REPLICATION		16	0.461361	1.14333	0.340909	0.519199	1	1198	tags=25%, list=4%, signal=26%
GO_REGULATION_OF_PROTEIN_INSERTION_INTO_MITOCHONDRIAL_MEMBRANE_INVOLVED_IN_APOPTOTIC_SIGNALING_PATHWAY	GO_REGULATION_OF_PROTEIN_INSERTION_INTO_MITOCHONDRIAL_MEMBRANE_INVOLVED_IN_APOPTOTIC_SIGNALING_PATHWAY		29	0.382597	1.14155	0.309963	0.521512	1	4141	tags=34%, list=12%, signal=39%
GO_POSITIVE_REGULATION_OF_PROTEIN_INSERTION_INTO_MITOCHONDRIAL_MEMBRANE_INVOLVED_IN_APOPTOTIC_SIGNALING_PATHWAY	GO_POSITIVE_REGULATION_OF_PROTEIN_INSERTION_INTO_MITOCHONDRIAL_MEMBRANE_INVOLVED_IN_APOPTOTIC_SIGNALING_PATHWAY		29	0.382596	1.14155	0.309963	0.520488	1	4141	tags=34%, list=12%, signal=39%
GO_RESPONSE_TO_VITAMIN_A	GO_RESPONSE_TO_VITAMIN_A		19	0.380497	1.14078	0.293395	0.520816	1	1524	tags=21%, list=5%, signal=22%
GO_CHROMATIN_SILENCING	GO_CHROMATIN_SILENCING		78	0.352357	1.14053	0.33678	0.520271	1	5797	tags=32%, list=17%, signal=39%
GO_MONOSACCHARIDE_CATABOLIC_PROCESS	GO_MONOSACCHARIDE_CATABOLIC_PROCESS		54	0.346416	1.14036	0.289562	0.519596	1	6125	tags=33%, list=18%, signal=41%
GO_COVALENT_CHROMATIN_MODIFICATION	GO_COVALENT_CHROMATIN_MODIFICATION		312	0.282113	1.13982	0.291228	0.519647	1	6258	tags=31%, list=19%, signal=38%
GO_REGULATION_OF_CELLULAR_PROTEIN_CATABOLIC_PROCESS	GO_REGULATION_OF_CELLULAR_PROTEIN_CATABOLIC_PROCESS		264	0.303514	1.13417	0.291209	0.529368	1	4621	tags=28%, list=14%, signal=32%
GO_HISTONE_METHYLATION	GO_HISTONE_METHYLATION		72	0.317501	1.13373	0.291032	0.529181	1	6250	tags=36%, list=19%, signal=44%
GO_REGULATION_OF_MRNA_SPLICING_VIA_SPLICEOSOME	GO_REGULATION_OF_MRNA_SPLICING_VIA_SPLICEOSOME		60	0.340916	1.13241	0.323917	0.530615	1	4197	tags=27%, list=13%, signal=30%
GO_TETRAPYRROLE_BIOSYNTHETIC_PROCESS	GO_TETRAPYRROLE_BIOSYNTHETIC_PROCESS		27	0.382234	1.13079	0.30541	0.532732	1	2861	tags=22%, list=9%, signal=24%
GO_ACTIN_NUCLEATION	GO_ACTIN_NUCLEATION		24	0.34655	1.13028	0.292007	0.532693	1	8214	tags=50%, list=25%, signal=66%
GO_BLASTOCYST_DEVELOPMENT	GO_BLASTOCYST_DEVELOPMENT		58	0.317328	1.12911	0.297907	0.533934	1	5760	tags=38%, list=17%, signal=46%
GO_ACIDIC_AMINO_ACID_TRANSPORT	GO_ACIDIC_AMINO_ACID_TRANSPORT		21	0.348431	1.12673	0.290172	0.53751	1	867	tags=14%, list=3%, signal=15%
GO_RESPONSE_TO_ANGIOTENSIN	GO_RESPONSE_TO_ANGIOTENSIN		16	0.407688	1.12262	0.313456	0.544068	1	2389	tags=31%, list=7%, signal=34%
GO_REGULATION_OF_CYSTEINE_TYPE_ENDOPEPTIDASE_ACTIVITY_INVOLVED_IN_APOPTOTIC_SIGNALING_PATHWAY	GO_REGULATION_OF_CYSTEINE_TYPE_ENDOPEPTIDASE_ACTIVITY_INVOLVED_IN_APOPTOTIC_SIGNALING_PATHWAY		22	0.426571	1.12182	0.332083	0.544609	1	4956	tags=41%, list=15%, signal=48%
GO_POSITIVE_REGULATION_OF_CELLULAR_PROTEIN_CATABOLIC_PROCESS	GO_POSITIVE_REGULATION_OF_CELLULAR_PROTEIN_CATABOLIC_PROCESS		186	0.313898	1.12126	0.333333	0.54461	1	5216	tags=31%, list=16%, signal=36%
GO_MALE_GAMETE_GENERATION	GO_MALE_GAMETE_GENERATION		398	0.246472	1.12111	0.261394	0.543841	1	4176	tags=19%, list=13%, signal=22%
GO_RIBONUCLEOSIDE_BISPHOSPHATE_METABOLIC_PROCESS	GO_RIBONUCLEOSIDE_BISPHOSPHATE_METABOLIC_PROCESS		37	0.3497	1.12106	0.308057	0.542895	1	7395	tags=38%, list=22%, signal=49%
GO_PURINE_NUCLEOSIDE_BISPHOSPHATE_METABOLIC_PROCESS	GO_PURINE_NUCLEOSIDE_BISPHOSPHATE_METABOLIC_PROCESS		37	0.3497	1.12106	0.308057	0.541863	1	7395	tags=38%, list=22%, signal=49%
GO_NUCLEOSIDE_BISPHOSPHATE_METABOLIC_PROCESS	GO_NUCLEOSIDE_BISPHOSPHATE_METABOLIC_PROCESS		37	0.3497	1.12106	0.308057	0.540836	1	7395	tags=38%, list=22%, signal=49%
GO_ORGANIC_ACID_TRANSMEMBRANE_TRANSPORT	GO_ORGANIC_ACID_TRANSMEMBRANE_TRANSPORT		98	0.285157	1.11993	0.284367	0.541914	1	7753	tags=31%, list=23%, signal=40%
GO_MICROTUBULE_POLYMERIZATION_OR_DEPOLYMERIZATION	GO_MICROTUBULE_POLYMERIZATION_OR_DEPOLYMERIZATION		38	0.346669	1.11973	0.333333	0.541262	1	1769	tags=21%, list=5%, signal=22%
GO_CELLULAR_RESPONSE_TO_UV	GO_CELLULAR_RESPONSE_TO_UV		65	0.320719	1.11886	0.287415	0.54185	1	2865	tags=26%, list=9%, signal=29%
GO_REGULATION_OF_PROTEIN_EXIT_FROM_ENDOPLASMIC_RETICULUM	GO_REGULATION_OF_PROTEIN_EXIT_FROM_ENDOPLASMIC_RETICULUM		18	0.397957	1.11878	0.311864	0.540948	1	3509	tags=28%, list=11%, signal=31%
GO_HISTONE_H2A_ACETYLATION	GO_HISTONE_H2A_ACETYLATION		15	0.419191	1.11847	0.327684	0.540533	1	7630	tags=53%, list=23%, signal=69%
GO_GLYCOSIDE_METABOLIC_PROCESS	GO_GLYCOSIDE_METABOLIC_PROCESS		16	0.447204	1.11836	0.371019	0.539725	1	9282	tags=38%, list=28%, signal=52%
GO_REGULATION_OF_DNA_DAMAGE_RESPONSE_SIGNAL_TRANSDUCTION_BY_P53_CLASS_MEDIATOR	GO_REGULATION_OF_DNA_DAMAGE_RESPONSE_SIGNAL_TRANSDUCTION_BY_P53_CLASS_MEDIATOR		27	0.35172	1.11773	0.317073	0.53989	1	2808	tags=22%, list=8%, signal=24%
GO_ACYL_COA_BIOSYNTHETIC_PROCESS	GO_ACYL_COA_BIOSYNTHETIC_PROCESS		48	0.327582	1.11712	0.314554	0.540055	1	4538	tags=23%, list=14%, signal=26%
GO_THIOESTER_BIOSYNTHETIC_PROCESS	GO_THIOESTER_BIOSYNTHETIC_PROCESS		48	0.327582	1.11712	0.314554	0.539048	1	4538	tags=23%, list=14%, signal=26%
GO_REGULATION_OF_INTRINSIC_APOPTOTIC_SIGNALING_PATHWAY_IN_RESPONSE_TO_DNA_DAMAGE	GO_REGULATION_OF_INTRINSIC_APOPTOTIC_SIGNALING_PATHWAY_IN_RESPONSE_TO_DNA_DAMAGE		32	0.352961	1.11705	0.308581	0.538181	1	2352	tags=25%, list=7%, signal=27%
GO_EMBRYONIC_CRANIAL_SKELETON_MORPHOGENESIS	GO_EMBRYONIC_CRANIAL_SKELETON_MORPHOGENESIS		46	0.342402	1.11704	0.326284	0.537211	1	3146	tags=24%, list=9%, signal=26%
GO_REGULATION_OF_PROTEASOMAL_UBIQUITIN_DEPENDENT_PROTEIN_CATABOLIC_PROCESS	GO_REGULATION_OF_PROTEASOMAL_UBIQUITIN_DEPENDENT_PROTEIN_CATABOLIC_PROCESS		142	0.300877	1.11699	0.298932	0.536306	1	4621	tags=28%, list=14%, signal=33%
GO_REGULATION_OF_MESONEPHROS_DEVELOPMENT	GO_REGULATION_OF_MESONEPHROS_DEVELOPMENT		26	0.351851	1.11688	0.312046	0.535496	1	6429	tags=35%, list=19%, signal=43%
GO_PROTEIN_POLYUBIQUITINATION	GO_PROTEIN_POLYUBIQUITINATION		236	0.28685	1.11616	0.308797	0.535818	1	4437	tags=26%, list=13%, signal=30%
GO_PROTEIN_FOLDING	GO_PROTEIN_FOLDING		204	0.30858	1.11472	0.321799	0.537476	1	4172	tags=25%, list=13%, signal=29%
GO_PORPHYRIN_CONTAINING_COMPOUND_METABOLIC_PROCESS	GO_PORPHYRIN_CONTAINING_COMPOUND_METABOLIC_PROCESS		36	0.345951	1.11421	0.321486	0.537456	1	2861	tags=17%, list=9%, signal=18%
GO_AMINO_ACID_TRANSPORT	GO_AMINO_ACID_TRANSPORT		120	0.274022	1.11093	0.321622	0.542716	1	7658	tags=31%, list=23%, signal=40%
GO_REGULATION_OF_MEGAKARYOCYTE_DIFFERENTIATION	GO_REGULATION_OF_MEGAKARYOCYTE_DIFFERENTIATION		27	0.385149	1.11023	0.354707	0.543069	1	8935	tags=41%, list=27%, signal=56%
GO_TELOMERE_CAPPING	GO_TELOMERE_CAPPING		28	0.386422	1.10734	0.355522	0.547587	1	8935	tags=50%, list=27%, signal=68%
GO_NEGATIVE_REGULATION_OF_DNA_METABOLIC_PROCESS	GO_NEGATIVE_REGULATION_OF_DNA_METABOLIC_PROCESS		106	0.289531	1.10716	0.297659	0.546957	1	5444	tags=27%, list=16%, signal=33%
GO_RIBONUCLEOSIDE_TRIPHOSPHATE_BIOSYNTHETIC_PROCESS	GO_RIBONUCLEOSIDE_TRIPHOSPHATE_BIOSYNTHETIC_PROCESS		46	0.377297	1.10715	0.374545	0.545981	1	8454	tags=48%, list=25%, signal=64%
GO_MODIFIED_AMINO_ACID_TRANSPORT	GO_MODIFIED_AMINO_ACID_TRANSPORT		26	0.35066	1.10686	0.319708	0.545518	1	7658	tags=38%, list=23%, signal=50%
GO_NEGATIVE_REGULATION_OF_LIPID_BIOSYNTHETIC_PROCESS	GO_NEGATIVE_REGULATION_OF_LIPID_BIOSYNTHETIC_PROCESS		42	0.312396	1.10373	0.321114	0.55039	1	4255	tags=24%, list=13%, signal=27%
GO_DEFENSE_RESPONSE_TO_VIRUS	GO_DEFENSE_RESPONSE_TO_VIRUS		144	0.336763	1.10358	0.358234	0.549689	1	7625	tags=38%, list=23%, signal=48%
GO_RIBONUCLEOPROTEIN_COMPLEX_BIOGENESIS	GO_RIBONUCLEOPROTEIN_COMPLEX_BIOGENESIS		417	0.34971	1.10326	0.370937	0.549285	1	6659	tags=35%, list=20%, signal=43%
GO_PURINE_RIBONUCLEOSIDE_MONOPHOSPHATE_BIOSYNTHETIC_PROCESS	GO_PURINE_RIBONUCLEOSIDE_MONOPHOSPHATE_BIOSYNTHETIC_PROCESS		58	0.372427	1.10278	0.341637	0.549197	1	8187	tags=45%, list=25%, signal=59%
GO_PURINE_NUCLEOSIDE_MONOPHOSPHATE_BIOSYNTHETIC_PROCESS	GO_PURINE_NUCLEOSIDE_MONOPHOSPHATE_BIOSYNTHETIC_PROCESS		58	0.372427	1.10278	0.341637	0.548206	1	8187	tags=45%, list=25%, signal=59%
GO_NUCLEAR_TRANSCRIBED_MRNA_CATABOLIC_PROCESS_DEADENYLATION_DEPENDENT_DECAY	GO_NUCLEAR_TRANSCRIBED_MRNA_CATABOLIC_PROCESS_DEADENYLATION_DEPENDENT_DECAY		53	0.317271	1.10275	0.320215	0.547283	1	7625	tags=43%, list=23%, signal=56%
GO_POLYOL_BIOSYNTHETIC_PROCESS	GO_POLYOL_BIOSYNTHETIC_PROCESS		26	0.364268	1.10124	0.347095	0.548962	1	4904	tags=27%, list=15%, signal=32%
GO_ADP_METABOLIC_PROCESS	GO_ADP_METABOLIC_PROCESS		44	0.369985	1.10111	0.359107	0.548251	1	9278	tags=48%, list=28%, signal=66%
GO_TELOMERE_MAINTENANCE_VIA_TELOMERASE	GO_TELOMERE_MAINTENANCE_VIA_TELOMERASE		17	0.404261	1.10093	0.34608	0.547584	1	5939	tags=41%, list=18%, signal=50%
GO_SPERMATID_DIFFERENTIATION	GO_SPERMATID_DIFFERENTIATION		106	0.263278	1.0995	0.316932	0.549218	1	3454	tags=19%, list=10%, signal=21%
GO_CHAPERONE_MEDIATED_PROTEIN_FOLDING	GO_CHAPERONE_MEDIATED_PROTEIN_FOLDING		44	0.361779	1.0979	0.366025	0.551139	1	4172	tags=30%, list=13%, signal=34%
GO_ORGANELLE_DISASSEMBLY	GO_ORGANELLE_DISASSEMBLY		179	0.264544	1.09724	0.308777	0.551382	1	6859	tags=31%, list=21%, signal=39%
GO_PTERIDINE_CONTAINING_COMPOUND_METABOLIC_PROCESS	GO_PTERIDINE_CONTAINING_COMPOUND_METABOLIC_PROCESS		36	0.341485	1.09549	0.335473	0.553645	1	4409	tags=28%, list=13%, signal=32%
GO_NEGATIVE_REGULATION_OF_MRNA_METABOLIC_PROCESS	GO_NEGATIVE_REGULATION_OF_MRNA_METABOLIC_PROCESS		34	0.365516	1.09433	0.373541	0.554818	1	5674	tags=29%, list=17%, signal=35%
GO_NEURON_APOPTOTIC_PROCESS	GO_NEURON_APOPTOTIC_PROCESS		34	0.327411	1.09419	0.314626	0.554114	1	6224	tags=38%, list=19%, signal=47%
GO_DEVELOPMENTAL_PROGRAMMED_CELL_DEATH	GO_DEVELOPMENTAL_PROGRAMMED_CELL_DEATH		26	0.368085	1.09368	0.344361	0.554078	1	5887	tags=38%, list=18%, signal=47%
GO_CELLULAR_RESPONSE_TO_LIGHT_STIMULUS	GO_CELLULAR_RESPONSE_TO_LIGHT_STIMULUS		86	0.290721	1.09337	0.344828	0.553645	1	2865	tags=22%, list=9%, signal=24%
GO_CELL_AGING	GO_CELL_AGING		66	0.297215	1.09067	0.325191	0.557713	1	6431	tags=38%, list=19%, signal=47%
GO_PEPTIDYL_ASPARAGINE_MODIFICATION	GO_PEPTIDYL_ASPARAGINE_MODIFICATION		38	0.354569	1.0886	0.344948	0.560677	1	5288	tags=34%, list=16%, signal=41%
GO_GTP_METABOLIC_PROCESS	GO_GTP_METABOLIC_PROCESS		22	0.36724	1.08804	0.353659	0.56071	1	4391	tags=41%, list=13%, signal=47%
GO_PROTEIN_HETEROTETRAMERIZATION	GO_PROTEIN_HETEROTETRAMERIZATION		36	0.411667	1.08747	0.433004	0.56079	1	14878	tags=78%, list=45%, signal=141%
GO_PROTEIN_O_LINKED_GLYCOSYLATION	GO_PROTEIN_O_LINKED_GLYCOSYLATION		91	0.282679	1.08737	0.339678	0.559991	1	7597	tags=33%, list=23%, signal=43%
GO_MITOCHONDRIAL_MEMBRANE_ORGANIZATION	GO_MITOCHONDRIAL_MEMBRANE_ORGANIZATION		90	0.323119	1.08733	0.356618	0.559094	1	5525	tags=33%, list=17%, signal=40%
GO_PURINE_NUCLEOBASE_METABOLIC_PROCESS	GO_PURINE_NUCLEOBASE_METABOLIC_PROCESS		20	0.411943	1.08728	0.37225	0.558211	1	5760	tags=35%, list=17%, signal=42%
GO_PROTEIN_MONOUBIQUITINATION	GO_PROTEIN_MONOUBIQUITINATION		50	0.334966	1.08657	0.335306	0.558605	1	767	tags=16%, list=2%, signal=16%
GO_GUANOSINE_CONTAINING_COMPOUND_METABOLIC_PROCESS	GO_GUANOSINE_CONTAINING_COMPOUND_METABOLIC_PROCESS		45	0.3164	1.08522	0.348609	0.56019	1	4391	tags=33%, list=13%, signal=38%
GO_MAINTENANCE_OF_PROTEIN_LOCALIZATION_IN_ORGANELLE	GO_MAINTENANCE_OF_PROTEIN_LOCALIZATION_IN_ORGANELLE		29	0.342933	1.08486	0.343206	0.559865	1	3072	tags=28%, list=9%, signal=30%
GO_ANTIGEN_PROCESSING_AND_PRESENTATION	GO_ANTIGEN_PROCESSING_AND_PRESENTATION		205	0.336883	1.0841	0.374088	0.560313	1	5219	tags=27%, list=16%, signal=32%
GO_NEUTRAL_AMINO_ACID_TRANSPORT	GO_NEUTRAL_AMINO_ACID_TRANSPORT		33	0.324735	1.08392	0.359133	0.559651	1	10922	tags=45%, list=33%, signal=68%
GO_REGULATION_OF_ESTABLISHMENT_OF_PLANAR_POLARITY	GO_REGULATION_OF_ESTABLISHMENT_OF_PLANAR_POLARITY		109	0.313135	1.08383	0.370884	0.558861	1	5456	tags=32%, list=16%, signal=38%
GO_NUCLEOSIDE_TRIPHOSPHATE_BIOSYNTHETIC_PROCESS	GO_NUCLEOSIDE_TRIPHOSPHATE_BIOSYNTHETIC_PROCESS		58	0.355447	1.08294	0.381371	0.559596	1	8454	tags=45%, list=25%, signal=60%
GO_NUCLEOBASE_CONTAINING_SMALL_MOLECULE_INTERCONVERSION	GO_NUCLEOBASE_CONTAINING_SMALL_MOLECULE_INTERCONVERSION		21	0.401799	1.07961	0.396667	0.564635	1	2528	tags=24%, list=8%, signal=26%
GO_RRNA_METHYLATION	GO_RRNA_METHYLATION		17	0.423228	1.07925	0.386861	0.564339	1	5388	tags=47%, list=16%, signal=56%
GO_REGULATION_OF_PROTEASOMAL_PROTEIN_CATABOLIC_PROCESS	GO_REGULATION_OF_PROTEASOMAL_PROTEIN_CATABOLIC_PROCESS		175	0.281321	1.07913	0.343972	0.563582	1	4621	tags=27%, list=14%, signal=31%
GO_NUCLEOSIDE_DIPHOSPHATE_METABOLIC_PROCESS	GO_NUCLEOSIDE_DIPHOSPHATE_METABOLIC_PROCESS		80	0.30819	1.07781	0.341544	0.565094	1	5081	tags=29%, list=15%, signal=34%
GO_PIGMENT_METABOLIC_PROCESS	GO_PIGMENT_METABOLIC_PROCESS		61	0.304463	1.07656	0.364048	0.566398	1	7323	tags=33%, list=22%, signal=42%
GO_INNER_EAR_RECEPTOR_STEREOCILIUM_ORGANIZATION	GO_INNER_EAR_RECEPTOR_STEREOCILIUM_ORGANIZATION		20	0.349791	1.07619	0.367965	0.566103	1	10539	tags=50%, list=32%, signal=73%
GO_POSITIVE_REGULATION_OF_PROTEIN_CATABOLIC_PROCESS	GO_POSITIVE_REGULATION_OF_PROTEIN_CATABOLIC_PROCESS		254	0.278687	1.07506	0.359019	0.567192	1	5216	tags=28%, list=16%, signal=33%
GO_GABAERGIC_NEURON_DIFFERENTIATION	GO_GABAERGIC_NEURON_DIFFERENTIATION		15	0.382204	1.0744	0.396114	0.567452	1	9415	tags=40%, list=28%, signal=56%
GO_REGULATION_OF_PROTEIN_CATABOLIC_PROCESS	GO_REGULATION_OF_PROTEIN_CATABOLIC_PROCESS		379	0.268311	1.07101	0.372414	0.572712	1	4989	tags=26%, list=15%, signal=30%
GO_RESPONSE_TO_INTERFERON_BETA	GO_RESPONSE_TO_INTERFERON_BETA		21	0.424618	1.06987	0.412727	0.573856	1	7565	tags=48%, list=23%, signal=62%
GO_NEGATIVE_REGULATION_OF_PROTEIN_CATABOLIC_PROCESS	GO_NEGATIVE_REGULATION_OF_PROTEIN_CATABOLIC_PROCESS		104	0.277489	1.0698	0.346667	0.573026	1	4790	tags=23%, list=14%, signal=27%
GO_CELLULAR_PROTEIN_COMPLEX_LOCALIZATION	GO_CELLULAR_PROTEIN_COMPLEX_LOCALIZATION		22	0.364758	1.06945	0.364842	0.572711	1	2932	tags=27%, list=9%, signal=30%
GO_ISOPRENOID_BIOSYNTHETIC_PROCESS	GO_ISOPRENOID_BIOSYNTHETIC_PROCESS		23	0.369834	1.06845	0.382353	0.573616	1	10466	tags=39%, list=31%, signal=57%
GO_ANATOMICAL_STRUCTURE_HOMEOSTASIS	GO_ANATOMICAL_STRUCTURE_HOMEOSTASIS		270	0.242965	1.06799	0.346377	0.5735	1	5004	tags=21%, list=15%, signal=24%
GO_SENSORY_PERCEPTION_OF_TASTE	GO_SENSORY_PERCEPTION_OF_TASTE		50	0.319661	1.06767	0.406375	0.573095	1	16959	tags=64%, list=51%, signal=130%
GO_HEXOSE_CATABOLIC_PROCESS	GO_HEXOSE_CATABOLIC_PROCESS		45	0.335107	1.06559	0.359322	0.575998	1	9890	tags=44%, list=30%, signal=63%
GO_REGULATION_OF_CELL_AGING	GO_REGULATION_OF_CELL_AGING		32	0.342378	1.06485	0.397237	0.576422	1	7042	tags=44%, list=21%, signal=55%
GO_POSITIVE_REGULATION_OF_MULTI_ORGANISM_PROCESS	GO_POSITIVE_REGULATION_OF_MULTI_ORGANISM_PROCESS		143	0.274074	1.06377	0.367576	0.577447	1	2148	tags=15%, list=6%, signal=16%
GO_ANTEROGRADE_AXONAL_TRANSPORT	GO_ANTEROGRADE_AXONAL_TRANSPORT		22	0.34914	1.0635	0.369048	0.576965	1	4811	tags=23%, list=14%, signal=27%
GO_PH_REDUCTION	GO_PH_REDUCTION		37	0.354515	1.0626	0.397887	0.577655	1	8576	tags=38%, list=26%, signal=51%
GO_ORGAN_OR_TISSUE_SPECIFIC_IMMUNE_RESPONSE	GO_ORGAN_OR_TISSUE_SPECIFIC_IMMUNE_RESPONSE		27	0.353308	1.06072	0.38036	0.580198	1	4072	tags=22%, list=12%, signal=25%
GO_MONOSACCHARIDE_BIOSYNTHETIC_PROCESS	GO_MONOSACCHARIDE_BIOSYNTHETIC_PROCESS		52	0.33806	1.06059	0.381513	0.579468	1	5345	tags=31%, list=16%, signal=37%
GO_TRANSCRIPTION_FROM_RNA_POLYMERASE_III_PROMOTER	GO_TRANSCRIPTION_FROM_RNA_POLYMERASE_III_PROMOTER		38	0.342334	1.06035	0.399287	0.578933	1	12339	tags=63%, list=37%, signal=100%
GO_GLUCOSAMINE_CONTAINING_COMPOUND_METABOLIC_PROCESS	GO_GLUCOSAMINE_CONTAINING_COMPOUND_METABOLIC_PROCESS		25	0.333726	1.05926	0.382637	0.579975	1	5759	tags=28%, list=17%, signal=34%
GO_REGULATION_OF_TELOMERE_CAPPING	GO_REGULATION_OF_TELOMERE_CAPPING		21	0.365807	1.05923	0.401421	0.579064	1	2888	tags=24%, list=9%, signal=26%
GO_ANTIGEN_PROCESSING_AND_PRESENTATION_OF_PEPTIDE_OR_POLYSACCHARIDE_ANTIGEN_VIA_MHC_CLASS_II	GO_ANTIGEN_PROCESSING_AND_PRESENTATION_OF_PEPTIDE_OR_POLYSACCHARIDE_ANTIGEN_VIA_MHC_CLASS_II		87	0.32687	1.05915	0.395264	0.578234	1	2109	tags=17%, list=6%, signal=18%
GO_ANTIGEN_PROCESSING_AND_PRESENTATION_OF_PEPTIDE_ANTIGEN_VIA_MHC_CLASS_II	GO_ANTIGEN_PROCESSING_AND_PRESENTATION_OF_PEPTIDE_ANTIGEN_VIA_MHC_CLASS_II		87	0.32687	1.05915	0.395264	0.577282	1	2109	tags=17%, list=6%, signal=18%
GO_HEXOSE_METABOLIC_PROCESS	GO_HEXOSE_METABOLIC_PROCESS		147	0.267979	1.05824	0.355725	0.57806	1	5431	tags=24%, list=16%, signal=28%
GO_NEURAL_TUBE_FORMATION	GO_NEURAL_TUBE_FORMATION		94	0.279536	1.05607	0.403595	0.581059	1	3578	tags=20%, list=11%, signal=23%
GO_CELLULAR_RESPONSE_TO_VIRUS	GO_CELLULAR_RESPONSE_TO_VIRUS		22	0.387996	1.05534	0.38961	0.581396	1	10085	tags=55%, list=30%, signal=78%
GO_FERTILIZATION	GO_FERTILIZATION		122	0.245437	1.05533	0.372244	0.580467	1	5031	tags=20%, list=15%, signal=24%
GO_REGULATION_OF_CELLULAR_RESPONSE_TO_HEAT	GO_REGULATION_OF_CELLULAR_RESPONSE_TO_HEAT		72	0.323231	1.05519	0.390991	0.579772	1	3540	tags=29%, list=11%, signal=33%
GO_RESPONSE_TO_MITOCHONDRIAL_DEPOLARISATION	GO_RESPONSE_TO_MITOCHONDRIAL_DEPOLARISATION		130	0.25599	1.04944	0.371852	0.589476	1	6859	tags=32%, list=21%, signal=41%
GO_MITOPHAGY_IN_RESPONSE_TO_MITOCHONDRIAL_DEPOLARIZATION	GO_MITOPHAGY_IN_RESPONSE_TO_MITOCHONDRIAL_DEPOLARIZATION		130	0.255989	1.04944	0.371852	0.588519	1	6859	tags=32%, list=21%, signal=41%
GO_MACROMITOPHAGY	GO_MACROMITOPHAGY		130	0.255989	1.04944	0.371852	0.587562	1	6859	tags=32%, list=21%, signal=41%
GO_POSITIVE_REGULATION_OF_TOR_SIGNALING	GO_POSITIVE_REGULATION_OF_TOR_SIGNALING		26	0.324275	1.04858	0.40493	0.588166	1	4986	tags=31%, list=15%, signal=36%
GO_PROTEIN_K63_LINKED_UBIQUITINATION	GO_PROTEIN_K63_LINKED_UBIQUITINATION		36	0.318931	1.04807	0.4	0.588134	1	3790	tags=25%, list=11%, signal=28%
GO_TUMOR_NECROSIS_FACTOR_MEDIATED_SIGNALING_PATHWAY	GO_TUMOR_NECROSIS_FACTOR_MEDIATED_SIGNALING_PATHWAY		115	0.342816	1.04786	0.424028	0.587592	1	5412	tags=30%, list=16%, signal=35%
GO_REGULATION_OF_ENDOPLASMIC_RETICULUM_STRESS_INDUCED_INTRINSIC_APOPTOTIC_SIGNALING_PATHWAY	GO_REGULATION_OF_ENDOPLASMIC_RETICULUM_STRESS_INDUCED_INTRINSIC_APOPTOTIC_SIGNALING_PATHWAY		28	0.34159	1.04518	0.391667	0.59162	1	3891	tags=32%, list=12%, signal=36%
GO_RIBOSOME_BIOGENESIS	GO_RIBOSOME_BIOGENESIS		295	0.352079	1.04388	0.450094	0.593007	1	5388	tags=30%, list=16%, signal=36%
GO_REGULATION_OF_GENE_EXPRESSION_BY_GENETIC_IMPRINTING	GO_REGULATION_OF_GENE_EXPRESSION_BY_GENETIC_IMPRINTING		16	0.358638	1.04167	0.42268	0.595996	1	5603	tags=38%, list=17%, signal=45%
GO_REGULATION_OF_VIRAL_GENOME_REPLICATION	GO_REGULATION_OF_VIRAL_GENOME_REPLICATION		72	0.317895	1.04083	0.405724	0.596493	1	7565	tags=38%, list=23%, signal=48%
GO_CELLULAR_RESPONSE_TO_LITHIUM_ION	GO_CELLULAR_RESPONSE_TO_LITHIUM_ION		16	0.352651	1.03968	0.412439	0.597735	1	4211	tags=31%, list=13%, signal=36%
GO_PARASYMPATHETIC_NERVOUS_SYSTEM_DEVELOPMENT	GO_PARASYMPATHETIC_NERVOUS_SYSTEM_DEVELOPMENT		16	0.356365	1.0362	0.414673	0.603181	1	6012	tags=38%, list=18%, signal=46%
GO_POSITIVE_REGULATION_OF_VIRAL_GENOME_REPLICATION	GO_POSITIVE_REGULATION_OF_VIRAL_GENOME_REPLICATION		29	0.334378	1.03588	0.407279	0.602859	1	7124	tags=38%, list=21%, signal=48%
GO_NEUTRAL_LIPID_BIOSYNTHETIC_PROCESS	GO_NEUTRAL_LIPID_BIOSYNTHETIC_PROCESS		27	0.333817	1.03539	0.419753	0.602813	1	6861	tags=37%, list=21%, signal=47%
GO_ACYLGLYCEROL_BIOSYNTHETIC_PROCESS	GO_ACYLGLYCEROL_BIOSYNTHETIC_PROCESS		27	0.333817	1.03538	0.419753	0.601853	1	6861	tags=37%, list=21%, signal=47%
GO_POSITIVE_REGULATION_OF_SIGNAL_TRANSDUCTION_BY_P53_CLASS_MEDIATOR	GO_POSITIVE_REGULATION_OF_SIGNAL_TRANSDUCTION_BY_P53_CLASS_MEDIATOR		17	0.344006	1.03404	0.415309	0.603384	1	2808	tags=24%, list=8%, signal=26%
GO_RESPONSE_TO_CADMIUM_ION	GO_RESPONSE_TO_CADMIUM_ION		39	0.318586	1.03274	0.411315	0.604792	1	1418	tags=15%, list=4%, signal=16%
GO_SINGLE_FERTILIZATION	GO_SINGLE_FERTILIZATION		92	0.241754	1.03127	0.415531	0.606548	1	6399	tags=25%, list=19%, signal=31%
GO_GERM_CELL_DEVELOPMENT	GO_GERM_CELL_DEVELOPMENT		183	0.240006	1.03087	0.422069	0.606304	1	3454	tags=17%, list=10%, signal=19%
GO_NEGATIVE_REGULATION_OF_AXON_EXTENSION	GO_NEGATIVE_REGULATION_OF_AXON_EXTENSION		37	0.312167	1.03085	0.427972	0.605388	1	623	tags=14%, list=2%, signal=14%
GO_POSITIVE_REGULATION_OF_CYSTEINE_TYPE_ENDOPEPTIDASE_ACTIVITY_INVOLVED_IN_APOPTOTIC_SIGNALING_PATHWAY	GO_POSITIVE_REGULATION_OF_CYSTEINE_TYPE_ENDOPEPTIDASE_ACTIVITY_INVOLVED_IN_APOPTOTIC_SIGNALING_PATHWAY		17	0.407715	1.03032	0.436266	0.605424	1	4956	tags=41%, list=15%, signal=48%
GO_AMIDE_BIOSYNTHETIC_PROCESS	GO_AMIDE_BIOSYNTHETIC_PROCESS		491	0.311158	1.02776	0.440217	0.609087	1	6394	tags=31%, list=19%, signal=38%
GO_ANION_HOMEOSTASIS	GO_ANION_HOMEOSTASIS		39	0.277802	1.0274	0.418208	0.608817	1	2282	tags=13%, list=7%, signal=14%
GO_REGULATION_OF_CHOLESTEROL_METABOLIC_PROCESS	GO_REGULATION_OF_CHOLESTEROL_METABOLIC_PROCESS		22	0.34896	1.02641	0.427136	0.60975	1	6571	tags=32%, list=20%, signal=40%
GO_POSITIVE_REGULATION_OF_NOTCH_SIGNALING_PATHWAY	GO_POSITIVE_REGULATION_OF_NOTCH_SIGNALING_PATHWAY		33	0.309543	1.02533	0.442748	0.61078	1	8431	tags=36%, list=25%, signal=49%
GO_ANION_TRANSMEMBRANE_TRANSPORT	GO_ANION_TRANSMEMBRANE_TRANSPORT		239	0.239931	1.02356	0.444162	0.613106	1	5086	tags=18%, list=15%, signal=22%
GO_POSITIVE_REGULATION_OF_RNA_SPLICING	GO_POSITIVE_REGULATION_OF_RNA_SPLICING		22	0.339862	1.02306	0.432862	0.613078	1	3790	tags=23%, list=11%, signal=26%
GO_POSITIVE_REGULATION_OF_RESPONSE_TO_CYTOKINE_STIMULUS	GO_POSITIVE_REGULATION_OF_RESPONSE_TO_CYTOKINE_STIMULUS		32	0.328912	1.02103	0.427653	0.615868	1	4720	tags=25%, list=14%, signal=29%
GO_REGULATION_OF_SYMBIOSIS_ENCOMPASSING_MUTUALISM_THROUGH_PARASITISM	GO_REGULATION_OF_SYMBIOSIS_ENCOMPASSING_MUTUALISM_THROUGH_PARASITISM		193	0.274765	1.02085	0.413333	0.615214	1	7188	tags=30%, list=22%, signal=38%
GO_PIRNA_METABOLIC_PROCESS	GO_PIRNA_METABOLIC_PROCESS		15	0.383363	1.0204	0.461078	0.615116	1	5819	tags=27%, list=17%, signal=32%
GO_PURINE_NUCLEOSIDE_BIOSYNTHETIC_PROCESS	GO_PURINE_NUCLEOSIDE_BIOSYNTHETIC_PROCESS		84	0.312855	1.01921	0.42732	0.616304	1	8187	tags=39%, list=25%, signal=52%
GO_PURINE_RIBONUCLEOSIDE_BIOSYNTHETIC_PROCESS	GO_PURINE_RIBONUCLEOSIDE_BIOSYNTHETIC_PROCESS		84	0.312855	1.01921	0.42732	0.615347	1	8187	tags=39%, list=25%, signal=52%
GO_PURINE_CONTAINING_COMPOUND_BIOSYNTHETIC_PROCESS	GO_PURINE_CONTAINING_COMPOUND_BIOSYNTHETIC_PROCESS		133	0.271756	1.01757	0.436688	0.617492	1	8187	tags=37%, list=25%, signal=49%
GO_PRODUCTION_OF_MOLECULAR_MEDIATOR_OF_IMMUNE_RESPONSE	GO_PRODUCTION_OF_MOLECULAR_MEDIATOR_OF_IMMUNE_RESPONSE		61	0.297757	1.01749	0.427861	0.616672	1	7166	tags=30%, list=22%, signal=38%
GO_REGULATION_OF_INTERFERON_BETA_PRODUCTION	GO_REGULATION_OF_INTERFERON_BETA_PRODUCTION		43	0.323974	1.01738	0.440559	0.615919	1	4446	tags=26%, list=13%, signal=29%
GO_PORE_COMPLEX_ASSEMBLY	GO_PORE_COMPLEX_ASSEMBLY		15	0.395552	1.01653	0.435115	0.616507	1	3227	tags=33%, list=10%, signal=37%
GO_POSITIVE_REGULATION_OF_T_CELL_MEDIATED_IMMUNITY	GO_POSITIVE_REGULATION_OF_T_CELL_MEDIATED_IMMUNITY		31	0.357285	1.01612	0.425249	0.616315	1	5869	tags=32%, list=18%, signal=39%
GO_PHOTORECEPTOR_CELL_DEVELOPMENT	GO_PHOTORECEPTOR_CELL_DEVELOPMENT		37	0.300903	1.01575	0.444292	0.616019	1	12732	tags=54%, list=38%, signal=87%
GO_GLYCOSYL_COMPOUND_METABOLIC_PROCESS	GO_GLYCOSYL_COMPOUND_METABOLIC_PROCESS		352	0.271114	1.01527	0.409949	0.61593	1	6143	tags=28%, list=18%, signal=33%
GO_HEME_METABOLIC_PROCESS	GO_HEME_METABOLIC_PROCESS		29	0.332463	1.01487	0.443719	0.615749	1	2861	tags=17%, list=9%, signal=19%
GO_CHEMOSENSORY_BEHAVIOR	GO_CHEMOSENSORY_BEHAVIOR		15	0.336869	1.01464	0.463141	0.615272	1	9093	tags=33%, list=27%, signal=46%
GO_REGULATION_OF_T_CELL_CYTOKINE_PRODUCTION	GO_REGULATION_OF_T_CELL_CYTOKINE_PRODUCTION		21	0.346976	1.01447	0.429809	0.614622	1	5456	tags=33%, list=16%, signal=40%
GO_GAMETE_GENERATION	GO_GAMETE_GENERATION		496	0.220532	1.01385	0.433289	0.614831	1	6409	tags=24%, list=19%, signal=29%
GO_CELL_SEPARATION_AFTER_CYTOKINESIS	GO_CELL_SEPARATION_AFTER_CYTOKINESIS		17	0.377938	1.01371	0.451866	0.614181	1	1598	tags=24%, list=5%, signal=25%
GO_PEPTIDYL_ARGININE_MODIFICATION	GO_PEPTIDYL_ARGININE_MODIFICATION		17	0.35791	1.01271	0.445194	0.615057	1	11989	tags=59%, list=36%, signal=92%
GO_PROTEIN_UBIQUITINATION_INVOLVED_IN_UBIQUITIN_DEPENDENT_PROTEIN_CATABOLIC_PROCESS	GO_PROTEIN_UBIQUITINATION_INVOLVED_IN_UBIQUITIN_DEPENDENT_PROTEIN_CATABOLIC_PROCESS		129	0.269161	1.01236	0.414931	0.614743	1	2157	tags=15%, list=6%, signal=16%
GO_N_TERMINAL_PROTEIN_AMINO_ACID_MODIFICATION	GO_N_TERMINAL_PROTEIN_AMINO_ACID_MODIFICATION		24	0.337237	1.01213	0.432432	0.614247	1	4767	tags=33%, list=14%, signal=39%
GO_REGULATION_OF_CELLULAR_SENESCENCE	GO_REGULATION_OF_CELLULAR_SENESCENCE		26	0.334679	1.01197	0.448911	0.613617	1	7042	tags=42%, list=21%, signal=54%
GO_HISTONE_H4_ACETYLATION	GO_HISTONE_H4_ACETYLATION		43	0.29581	1.01194	0.440823	0.612745	1	2344	tags=21%, list=7%, signal=22%
GO_REGULATION_OF_B_CELL_APOPTOTIC_PROCESS	GO_REGULATION_OF_B_CELL_APOPTOTIC_PROCESS		18	0.366432	1.0119	0.433613	0.611888	1	3734	tags=33%, list=11%, signal=38%
GO_GLUCOSE_6_PHOSPHATE_METABOLIC_PROCESS	GO_GLUCOSE_6_PHOSPHATE_METABOLIC_PROCESS		20	0.398704	1.01186	0.449918	0.611036	1	9826	tags=50%, list=30%, signal=71%
GO_NEGATIVE_REGULATION_OF_CELL_CYCLE_ARREST	GO_NEGATIVE_REGULATION_OF_CELL_CYCLE_ARREST		18	0.333967	1.0118	0.439063	0.610212	1	3677	tags=22%, list=11%, signal=25%
GO_CELLULAR_MODIFIED_AMINO_ACID_METABOLIC_PROCESS	GO_CELLULAR_MODIFIED_AMINO_ACID_METABOLIC_PROCESS		211	0.257844	1.01148	0.456338	0.609885	1	5966	tags=25%, list=18%, signal=30%
GO_POSITIVE_REGULATION_OF_CELLULAR_PROTEIN_LOCALIZATION	GO_POSITIVE_REGULATION_OF_CELLULAR_PROTEIN_LOCALIZATION		336	0.240311	1.01085	0.444113	0.610124	1	3776	tags=19%, list=11%, signal=21%
GO_PHARYNGEAL_SYSTEM_DEVELOPMENT	GO_PHARYNGEAL_SYSTEM_DEVELOPMENT		16	0.349816	1.01042	0.439418	0.609942	1	5990	tags=38%, list=18%, signal=46%
GO_RRNA_METABOLIC_PROCESS	GO_RRNA_METABOLIC_PROCESS		245	0.350663	1.00952	0.480151	0.610631	1	5388	tags=30%, list=16%, signal=36%
GO_MITOCHONDRIAL_TRANSPORT	GO_MITOCHONDRIAL_TRANSPORT		162	0.290431	1.00944	0.430127	0.60987	1	5549	tags=31%, list=17%, signal=37%
GO_REGULATION_OF_DEFENSE_RESPONSE_TO_VIRUS_BY_HOST	GO_REGULATION_OF_DEFENSE_RESPONSE_TO_VIRUS_BY_HOST		129	0.254557	1.00891	0.44582	0.609929	1	6935	tags=31%, list=21%, signal=39%
GO_REGULATION_OF_LYMPHOCYTE_CHEMOTAXIS	GO_REGULATION_OF_LYMPHOCYTE_CHEMOTAXIS		20	0.377381	1.00821	0.453292	0.610211	1	5777	tags=25%, list=17%, signal=30%
GO_EMBRYONIC_AXIS_SPECIFICATION	GO_EMBRYONIC_AXIS_SPECIFICATION		33	0.308902	1.00772	0.470229	0.610188	1	6408	tags=24%, list=19%, signal=30%
GO_ESTABLISHMENT_OF_TISSUE_POLARITY	GO_ESTABLISHMENT_OF_TISSUE_POLARITY		17	0.356224	1.00633	0.454704	0.611718	1	6809	tags=35%, list=20%, signal=44%
GO_NUCLEOTIDE_EXCISION_REPAIR_PREINCISION_COMPLEX_STABILIZATION	GO_NUCLEOTIDE_EXCISION_REPAIR_PREINCISION_COMPLEX_STABILIZATION		21	0.358462	1.00373	0.439394	0.61541	1	7995	tags=43%, list=24%, signal=56%
GO_NUCLEOTIDE_EXCISION_REPAIR_DNA_INCISION_3_TO_LESION	GO_NUCLEOTIDE_EXCISION_REPAIR_DNA_INCISION_3_TO_LESION		21	0.358462	1.00373	0.439394	0.614498	1	7995	tags=43%, list=24%, signal=56%
GO_HISTONE_UBIQUITINATION	GO_HISTONE_UBIQUITINATION		34	0.333272	1.00301	0.452158	0.61493	1	3057	tags=21%, list=9%, signal=23%
GO_RIBONUCLEOPROTEIN_COMPLEX_SUBUNIT_ORGANIZATION	GO_RIBONUCLEOPROTEIN_COMPLEX_SUBUNIT_ORGANIZATION		185	0.301115	1.0029	0.448669	0.614224	1	6659	tags=33%, list=20%, signal=41%
GO_PROTEIN_AUTOUBIQUITINATION	GO_PROTEIN_AUTOUBIQUITINATION		48	0.28607	1.00093	0.444643	0.616811	1	4129	tags=25%, list=12%, signal=29%
GO_RNA_SECONDARY_STRUCTURE_UNWINDING	GO_RNA_SECONDARY_STRUCTURE_UNWINDING		40	0.314936	0.999521	0.451673	0.618391	1	5149	tags=28%, list=15%, signal=32%
GO_SODIUM_INDEPENDENT_ORGANIC_ANION_TRANSPORT	GO_SODIUM_INDEPENDENT_ORGANIC_ANION_TRANSPORT		20	0.329889	0.998753	0.470839	0.618833	1	14000	tags=50%, list=42%, signal=86%
GO_CELLULAR_MODIFIED_AMINO_ACID_CATABOLIC_PROCESS	GO_CELLULAR_MODIFIED_AMINO_ACID_CATABOLIC_PROCESS		16	0.364643	0.996443	0.469551	0.621993	1	7769	tags=38%, list=23%, signal=49%
GO_SYNAPTONEMAL_COMPLEX_ORGANIZATION	GO_SYNAPTONEMAL_COMPLEX_ORGANIZATION		19	0.333001	0.995639	0.464789	0.622512	1	8903	tags=42%, list=27%, signal=57%
GO_POSITIVE_REGULATION_OF_INTERFERON_BETA_PRODUCTION	GO_POSITIVE_REGULATION_OF_INTERFERON_BETA_PRODUCTION		30	0.337599	0.995531	0.449827	0.621817	1	4263	tags=27%, list=13%, signal=31%
GO_PROTEIN_K11_LINKED_UBIQUITINATION	GO_PROTEIN_K11_LINKED_UBIQUITINATION		27	0.326483	0.994678	0.451977	0.622446	1	5216	tags=30%, list=16%, signal=35%
GO_OVARIAN_FOLLICLE_DEVELOPMENT	GO_OVARIAN_FOLLICLE_DEVELOPMENT		56	0.272278	0.994179	0.476728	0.622421	1	2352	tags=18%, list=7%, signal=19%
GO_CELLULAR_RESPONSE_TO_DSRNA	GO_CELLULAR_RESPONSE_TO_DSRNA		34	0.312504	0.99385	0.463899	0.622118	1	5384	tags=29%, list=16%, signal=35%
GO_POSTTRANSCRIPTIONAL_REGULATION_OF_GENE_EXPRESSION	GO_POSTTRANSCRIPTIONAL_REGULATION_OF_GENE_EXPRESSION		419	0.250598	0.99323	0.452962	0.62233	1	4568	tags=24%, list=14%, signal=28%
GO_GLUCURONATE_METABOLIC_PROCESS	GO_GLUCURONATE_METABOLIC_PROCESS		27	0.32953	0.991422	0.476762	0.624538	1	16802	tags=70%, list=51%, signal=142%
GO_URONIC_ACID_METABOLIC_PROCESS	GO_URONIC_ACID_METABOLIC_PROCESS		27	0.32953	0.991422	0.476762	0.623632	1	16802	tags=70%, list=51%, signal=142%
GO_CARBOHYDRATE_CATABOLIC_PROCESS	GO_CARBOHYDRATE_CATABOLIC_PROCESS		105	0.264717	0.991207	0.468847	0.623118	1	6125	tags=30%, list=18%, signal=36%
GO_IRON_ION_TRANSPORT	GO_IRON_ION_TRANSPORT		54	0.293285	0.990619	0.479675	0.623257	1	9067	tags=39%, list=27%, signal=53%
GO_INTRINSIC_APOPTOTIC_SIGNALING_PATHWAY_IN_RESPONSE_TO_DNA_DAMAGE_BY_P53_CLASS_MEDIATOR	GO_INTRINSIC_APOPTOTIC_SIGNALING_PATHWAY_IN_RESPONSE_TO_DNA_DAMAGE_BY_P53_CLASS_MEDIATOR		29	0.332254	0.989034	0.462766	0.625159	1	5525	tags=41%, list=17%, signal=50%
GO_MEMBRANE_PROTEIN_PROTEOLYSIS	GO_MEMBRANE_PROTEIN_PROTEOLYSIS		34	0.301892	0.988968	0.463717	0.624364	1	2008	tags=18%, list=6%, signal=19%
GO_PYRUVATE_METABOLIC_PROCESS	GO_PYRUVATE_METABOLIC_PROCESS		60	0.303249	0.988947	0.443709	0.623511	1	9278	tags=40%, list=28%, signal=55%
GO_CELL_CELL_RECOGNITION	GO_CELL_CELL_RECOGNITION		54	0.266367	0.988392	0.496454	0.623598	1	8484	tags=33%, list=26%, signal=45%
GO_OOCYTE_DIFFERENTIATION	GO_OOCYTE_DIFFERENTIATION		35	0.300099	0.986244	0.48378	0.626494	1	4498	tags=29%, list=14%, signal=33%
GO_PROTEIN_LOCALIZATION_TO_NUCLEUS	GO_PROTEIN_LOCALIZATION_TO_NUCLEUS		151	0.261899	0.985726	0.455161	0.626507	1	3578	tags=21%, list=11%, signal=23%
GO_APOPTOTIC_PROCESS_INVOLVED_IN_MORPHOGENESIS	GO_APOPTOTIC_PROCESS_INVOLVED_IN_MORPHOGENESIS		16	0.356578	0.985529	0.475894	0.62596	1	5887	tags=44%, list=18%, signal=53%
GO_CRANIAL_NERVE_DEVELOPMENT	GO_CRANIAL_NERVE_DEVELOPMENT		42	0.261527	0.983754	0.479876	0.628238	1	3803	tags=19%, list=11%, signal=21%
GO_POSITIVE_REGULATION_OF_PROTEOLYSIS	GO_POSITIVE_REGULATION_OF_PROTEOLYSIS		352	0.256996	0.983614	0.459044	0.627584	1	5382	tags=27%, list=16%, signal=32%
GO_NADP_METABOLIC_PROCESS	GO_NADP_METABOLIC_PROCESS		27	0.334931	0.982971	0.494309	0.627851	1	5730	tags=26%, list=17%, signal=31%
GO_CRANIAL_NERVE_MORPHOGENESIS	GO_CRANIAL_NERVE_MORPHOGENESIS		23	0.319336	0.980368	0.471698	0.631554	1	2740	tags=22%, list=8%, signal=24%
GO_APOPTOTIC_MITOCHONDRIAL_CHANGES	GO_APOPTOTIC_MITOCHONDRIAL_CHANGES		56	0.291097	0.979743	0.4832	0.63178	1	3624	tags=29%, list=11%, signal=32%
GO_MITOCHONDRIAL_FUSION	GO_MITOCHONDRIAL_FUSION		17	0.360611	0.979651	0.517544	0.631046	1	4575	tags=24%, list=14%, signal=27%
GO_DORSAL_VENTRAL_AXIS_SPECIFICATION	GO_DORSAL_VENTRAL_AXIS_SPECIFICATION		20	0.338466	0.977831	0.490909	0.633381	1	5456	tags=30%, list=16%, signal=36%
GO_XENOPHAGY	GO_XENOPHAGY		101	0.247896	0.977699	0.490683	0.63272	1	6604	tags=32%, list=20%, signal=39%
GO_NEPHRON_TUBULE_FORMATION	GO_NEPHRON_TUBULE_FORMATION		18	0.336234	0.976293	0.506294	0.634317	1	13437	tags=61%, list=40%, signal=102%
GO_SERINE_FAMILY_AMINO_ACID_METABOLIC_PROCESS	GO_SERINE_FAMILY_AMINO_ACID_METABOLIC_PROCESS		42	0.29706	0.975598	0.470313	0.634725	1	5449	tags=26%, list=16%, signal=31%
GO_RESPONSE_TO_INTERLEUKIN_4	GO_RESPONSE_TO_INTERLEUKIN_4		29	0.314364	0.972998	0.492635	0.638487	1	2924	tags=21%, list=9%, signal=23%
GO_GLYCOPROTEIN_METABOLIC_PROCESS	GO_GLYCOPROTEIN_METABOLIC_PROCESS		334	0.233709	0.970133	0.484627	0.642646	1	5288	tags=22%, list=16%, signal=25%
GO_NEGATIVE_REGULATION_OF_ENDOPLASMIC_RETICULUM_STRESS_INDUCED_INTRINSIC_APOPTOTIC_SIGNALING_PATHWAY	GO_NEGATIVE_REGULATION_OF_ENDOPLASMIC_RETICULUM_STRESS_INDUCED_INTRINSIC_APOPTOTIC_SIGNALING_PATHWAY		17	0.360102	0.969667	0.51468	0.642568	1	3254	tags=35%, list=10%, signal=39%
GO_GLUTATHIONE_METABOLIC_PROCESS	GO_GLUTATHIONE_METABOLIC_PROCESS		58	0.306772	0.967851	0.479638	0.644897	1	5710	tags=26%, list=17%, signal=31%
GO_MITOCHONDRION_MORPHOGENESIS	GO_MITOCHONDRION_MORPHOGENESIS		19	0.357168	0.965893	0.513465	0.647467	1	3454	tags=37%, list=10%, signal=41%
GO_PROTEIN_TARGETING_TO_MITOCHONDRION	GO_PROTEIN_TARGETING_TO_MITOCHONDRION		46	0.344196	0.963916	0.507491	0.650082	1	6906	tags=33%, list=21%, signal=41%
GO_DENDRITIC_SPINE_DEVELOPMENT	GO_DENDRITIC_SPINE_DEVELOPMENT		19	0.365194	0.961197	0.490196	0.653924	1	6423	tags=37%, list=19%, signal=46%
GO_POSITIVE_REGULATION_OF_DNA_RECOMBINATION	GO_POSITIVE_REGULATION_OF_DNA_RECOMBINATION		18	0.353754	0.960223	0.524138	0.654721	1	2300	tags=22%, list=7%, signal=24%
GO_REGULATION_OF_PROTEIN_OLIGOMERIZATION	GO_REGULATION_OF_PROTEIN_OLIGOMERIZATION		30	0.2889	0.959436	0.523585	0.655176	1	3709	tags=23%, list=11%, signal=26%
GO_GLUCOSE_METABOLIC_PROCESS	GO_GLUCOSE_METABOLIC_PROCESS		113	0.251116	0.95815	0.490769	0.656603	1	5431	tags=25%, list=16%, signal=30%
GO_PROTEIN_TETRAMERIZATION	GO_PROTEIN_TETRAMERIZATION		130	0.235151	0.957297	0.502152	0.657254	1	5791	tags=24%, list=17%, signal=29%
GO_GENETIC_IMPRINTING	GO_GENETIC_IMPRINTING		20	0.310651	0.957127	0.527869	0.656622	1	5603	tags=35%, list=17%, signal=42%
GO_PHAGOSOME_ACIDIFICATION	GO_PHAGOSOME_ACIDIFICATION		25	0.348877	0.956189	0.519713	0.657417	1	10794	tags=44%, list=32%, signal=65%
GO_IMMUNOGLOBULIN_PRODUCTION_INVOLVED_IN_IMMUNOGLOBULIN_MEDIATED_IMMUNE_RESPONSE	GO_IMMUNOGLOBULIN_PRODUCTION_INVOLVED_IN_IMMUNOGLOBULIN_MEDIATED_IMMUNE_RESPONSE		22	0.343858	0.955651	0.512238	0.65747	1	6403	tags=32%, list=19%, signal=39%
GO_LEUKOCYTE_APOPTOTIC_PROCESS	GO_LEUKOCYTE_APOPTOTIC_PROCESS		22	0.340923	0.954567	0.5125	0.658511	1	5385	tags=32%, list=16%, signal=38%
GO_REGULATION_OF_ISOTYPE_SWITCHING	GO_REGULATION_OF_ISOTYPE_SWITCHING		24	0.326211	0.952818	0.52901	0.660626	1	2300	tags=21%, list=7%, signal=22%
GO_MOTOR_NEURON_AXON_GUIDANCE	GO_MOTOR_NEURON_AXON_GUIDANCE		27	0.307368	0.952422	0.508671	0.660443	1	1071	tags=15%, list=3%, signal=15%
GO_ARGININE_METABOLIC_PROCESS	GO_ARGININE_METABOLIC_PROCESS		17	0.341412	0.951889	0.539548	0.660484	1	5387	tags=29%, list=16%, signal=35%
GO_NATURAL_KILLER_CELL_MEDIATED_IMMUNITY	GO_NATURAL_KILLER_CELL_MEDIATED_IMMUNITY		26	0.341898	0.951483	0.542429	0.660303	1	1451	tags=19%, list=4%, signal=20%
GO_CYTOCHROME_COMPLEX_ASSEMBLY	GO_CYTOCHROME_COMPLEX_ASSEMBLY		15	0.385243	0.950076	0.535912	0.661913	1	4716	tags=27%, list=14%, signal=31%
GO_NEGATIVE_REGULATION_OF_VIRAL_RELEASE_FROM_HOST_CELL	GO_NEGATIVE_REGULATION_OF_VIRAL_RELEASE_FROM_HOST_CELL		16	0.353684	0.948298	0.526126	0.664163	1	4192	tags=31%, list=13%, signal=36%
GO_T_CELL_APOPTOTIC_PROCESS	GO_T_CELL_APOPTOTIC_PROCESS		15	0.362433	0.947674	0.51215	0.664293	1	5385	tags=33%, list=16%, signal=40%
GO_RESPONSE_TO_VIRUS	GO_RESPONSE_TO_VIRUS		225	0.274077	0.947411	0.502471	0.66384	1	7625	tags=34%, list=23%, signal=44%
GO_MODULATION_OF_TRANSCRIPTION_IN_OTHER_ORGANISM_INVOLVED_IN_SYMBIOTIC_INTERACTION	GO_MODULATION_OF_TRANSCRIPTION_IN_OTHER_ORGANISM_INVOLVED_IN_SYMBIOTIC_INTERACTION		22	0.320615	0.945521	0.516693	0.666295	1	2148	tags=18%, list=6%, signal=19%
GO_VESICLE_TARGETING	GO_VESICLE_TARGETING		75	0.26609	0.943816	0.509666	0.668461	1	6626	tags=28%, list=20%, signal=35%
GO_DICARBOXYLIC_ACID_TRANSPORT	GO_DICARBOXYLIC_ACID_TRANSPORT		69	0.242891	0.943703	0.563187	0.667766	1	7653	tags=28%, list=23%, signal=36%
GO_CLATHRIN_MEDIATED_ENDOCYTOSIS	GO_CLATHRIN_MEDIATED_ENDOCYTOSIS		35	0.296078	0.942812	0.525237	0.668412	1	6126	tags=31%, list=18%, signal=38%
GO_PYRIDINE_CONTAINING_COMPOUND_BIOSYNTHETIC_PROCESS	GO_PYRIDINE_CONTAINING_COMPOUND_BIOSYNTHETIC_PROCESS		18	0.329479	0.942562	0.518349	0.667981	1	7769	tags=50%, list=23%, signal=65%
GO_ORGANIC_CATION_TRANSPORT	GO_ORGANIC_CATION_TRANSPORT		18	0.320861	0.942405	0.524927	0.667342	1	2426	tags=17%, list=7%, signal=18%
GO_GOLGI_VESICLE_TRANSPORT	GO_GOLGI_VESICLE_TRANSPORT		308	0.236424	0.942248	0.528131	0.666719	1	5922	tags=24%, list=18%, signal=29%
GO_POSITIVE_REGULATION_OF_TYPE_I_INTERFERON_PRODUCTION	GO_POSITIVE_REGULATION_OF_TYPE_I_INTERFERON_PRODUCTION		70	0.281594	0.940176	0.517422	0.669476	1	4263	tags=24%, list=13%, signal=28%
GO_AMIDE_TRANSPORT	GO_AMIDE_TRANSPORT		90	0.229641	0.940035	0.579652	0.668799	1	3658	tags=16%, list=11%, signal=17%
GO_TETRAPYRROLE_METABOLIC_PROCESS	GO_TETRAPYRROLE_METABOLIC_PROCESS		57	0.259282	0.939521	0.536741	0.668737	1	1382	tags=11%, list=4%, signal=11%
GO_NON_CANONICAL_WNT_SIGNALING_PATHWAY	GO_NON_CANONICAL_WNT_SIGNALING_PATHWAY		134	0.268069	0.939127	0.517413	0.668549	1	5456	tags=28%, list=16%, signal=34%
GO_NEURON_DEATH	GO_NEURON_DEATH		46	0.252827	0.938782	0.557724	0.668247	1	5525	tags=28%, list=17%, signal=34%
GO_NUCLEOSIDE_MONOPHOSPHATE_METABOLIC_PROCESS	GO_NUCLEOSIDE_MONOPHOSPHATE_METABOLIC_PROCESS		228	0.28056	0.938563	0.504554	0.667736	1	9665	tags=41%, list=29%, signal=57%
GO_TONGUE_DEVELOPMENT	GO_TONGUE_DEVELOPMENT		19	0.342341	0.93671	0.548048	0.67011	1	5000	tags=32%, list=15%, signal=37%
GO_NONMOTILE_PRIMARY_CILIUM_ASSEMBLY	GO_NONMOTILE_PRIMARY_CILIUM_ASSEMBLY		22	0.32156	0.936327	0.552773	0.669904	1	2511	tags=23%, list=8%, signal=25%
GO_CELLULAR_GLUCURONIDATION	GO_CELLULAR_GLUCURONIDATION		22	0.330045	0.936317	0.562319	0.669024	1	16802	tags=68%, list=51%, signal=138%
GO_BETA_CATENIN_TCF_COMPLEX_ASSEMBLY	GO_BETA_CATENIN_TCF_COMPLEX_ASSEMBLY		41	0.296411	0.934685	0.539782	0.670959	1	5282	tags=24%, list=16%, signal=29%
GO_MONOSACCHARIDE_METABOLIC_PROCESS	GO_MONOSACCHARIDE_METABOLIC_PROCESS		191	0.230437	0.933625	0.553731	0.671926	1	6125	tags=23%, list=18%, signal=27%
GO_STEROL_BIOSYNTHETIC_PROCESS	GO_STEROL_BIOSYNTHETIC_PROCESS		41	0.308167	0.932164	0.516014	0.673628	1	4201	tags=24%, list=13%, signal=28%
GO_EPHRIN_RECEPTOR_SIGNALING_PATHWAY	GO_EPHRIN_RECEPTOR_SIGNALING_PATHWAY		84	0.261031	0.931787	0.543657	0.673424	1	6126	tags=32%, list=18%, signal=39%
GO_CELLULAR_KETONE_METABOLIC_PROCESS	GO_CELLULAR_KETONE_METABOLIC_PROCESS		63	0.2731	0.927319	0.555891	0.680447	1	9282	tags=38%, list=28%, signal=53%
GO_HISTONE_H2A_UBIQUITINATION	GO_HISTONE_H2A_UBIQUITINATION		16	0.343608	0.927273	0.561886	0.679618	1	3057	tags=25%, list=9%, signal=28%
GO_ENDOPLASMIC_RETICULUM_ORGANIZATION	GO_ENDOPLASMIC_RETICULUM_ORGANIZATION		37	0.288533	0.925887	0.546233	0.681155	1	6693	tags=35%, list=20%, signal=44%
GO_CHROMATIN_SILENCING_AT_RDNA	GO_CHROMATIN_SILENCING_AT_RDNA		35	0.360948	0.925737	0.601429	0.680517	1	5791	tags=31%, list=17%, signal=38%
GO_CELLULAR_PROTEIN_COMPLEX_ASSEMBLY	GO_CELLULAR_PROTEIN_COMPLEX_ASSEMBLY		319	0.229757	0.924745	0.53719	0.681297	1	6101	tags=24%, list=18%, signal=29%
GO_ORGANOPHOSPHATE_ESTER_TRANSPORT	GO_ORGANOPHOSPHATE_ESTER_TRANSPORT		85	0.237907	0.922326	0.581979	0.684644	1	4062	tags=19%, list=12%, signal=21%
GO_CELL_KILLING	GO_CELL_KILLING		50	0.271302	0.922205	0.523659	0.683959	1	5071	tags=22%, list=15%, signal=26%
GO_REGULATION_OF_TRANSLATIONAL_ELONGATION	GO_REGULATION_OF_TRANSLATIONAL_ELONGATION		23	0.334787	0.920644	0.589512	0.685816	1	6245	tags=39%, list=19%, signal=48%
GO_NEGATIVE_REGULATION_OF_CELL_AGING	GO_NEGATIVE_REGULATION_OF_CELL_AGING		16	0.325088	0.920254	0.56304	0.685589	1	6352	tags=44%, list=19%, signal=54%
GO_CARBOHYDRATE_TRANSMEMBRANE_TRANSPORT	GO_CARBOHYDRATE_TRANSMEMBRANE_TRANSPORT		24	0.312633	0.917903	0.582402	0.688739	1	1909	tags=17%, list=6%, signal=18%
GO_ACTIVATION_OF_CYSTEINE_TYPE_ENDOPEPTIDASE_ACTIVITY	GO_ACTIVATION_OF_CYSTEINE_TYPE_ENDOPEPTIDASE_ACTIVITY		92	0.257589	0.916015	0.561997	0.691074	1	4720	tags=22%, list=14%, signal=25%
GO_INNATE_IMMUNE_RESPONSE_ACTIVATING_CELL_SURFACE_RECEPTOR_SIGNALING_PATHWAY	GO_INNATE_IMMUNE_RESPONSE_ACTIVATING_CELL_SURFACE_RECEPTOR_SIGNALING_PATHWAY		104	0.285094	0.915982	0.527928	0.690221	1	9007	tags=41%, list=27%, signal=57%
GO_REGULATION_OF_RHODOPSIN_MEDIATED_SIGNALING_PATHWAY	GO_REGULATION_OF_RHODOPSIN_MEDIATED_SIGNALING_PATHWAY		26	0.272412	0.914103	0.596059	0.692608	1	3310	tags=19%, list=10%, signal=21%
GO_PROTEIN_IMPORT	GO_PROTEIN_IMPORT		150	0.242657	0.912064	0.559524	0.695295	1	3614	tags=19%, list=11%, signal=21%
GO_NUCLEOPHAGY	GO_NUCLEOPHAGY		17	0.315755	0.911019	0.569316	0.696214	1	9912	tags=41%, list=30%, signal=59%
GO_CRANIAL_SKELETAL_SYSTEM_DEVELOPMENT	GO_CRANIAL_SKELETAL_SYSTEM_DEVELOPMENT		55	0.27119	0.908817	0.581538	0.699089	1	3146	tags=20%, list=9%, signal=22%
GO_PHOSPHATIDYLETHANOLAMINE_METABOLIC_PROCESS	GO_PHOSPHATIDYLETHANOLAMINE_METABOLIC_PROCESS		17	0.332913	0.907466	0.618243	0.700543	1	9300	tags=47%, list=28%, signal=65%
GO_RESPONSE_TO_INTERFERON_ALPHA	GO_RESPONSE_TO_INTERFERON_ALPHA		20	0.365891	0.905151	0.556522	0.703709	1	7887	tags=50%, list=24%, signal=66%
GO_REGULATION_OF_DEFENSE_RESPONSE_TO_VIRUS	GO_REGULATION_OF_DEFENSE_RESPONSE_TO_VIRUS		183	0.230446	0.903676	0.583861	0.705401	1	6935	tags=28%, list=21%, signal=35%
GO_NEGATIVE_REGULATION_OF_EXTRINSIC_APOPTOTIC_SIGNALING_PATHWAY_VIA_DEATH_DOMAIN_RECEPTORS	GO_NEGATIVE_REGULATION_OF_EXTRINSIC_APOPTOTIC_SIGNALING_PATHWAY_VIA_DEATH_DOMAIN_RECEPTORS		34	0.290584	0.903292	0.602564	0.705157	1	5382	tags=26%, list=16%, signal=32%
GO_NEGATIVE_REGULATION_OF_TYPE_I_INTERFERON_PRODUCTION	GO_NEGATIVE_REGULATION_OF_TYPE_I_INTERFERON_PRODUCTION		38	0.304035	0.903182	0.560579	0.704438	1	4531	tags=29%, list=14%, signal=33%
GO_ZYMOGEN_ACTIVATION	GO_ZYMOGEN_ACTIVATION		106	0.247124	0.903134	0.593168	0.703603	1	5592	tags=23%, list=17%, signal=27%
GO_HISTONE_MONOUBIQUITINATION	GO_HISTONE_MONOUBIQUITINATION		23	0.318455	0.902883	0.558317	0.703139	1	654	tags=13%, list=2%, signal=13%
GO_THIOESTER_METABOLIC_PROCESS	GO_THIOESTER_METABOLIC_PROCESS		76	0.248498	0.900388	0.585246	0.706597	1	4538	tags=21%, list=14%, signal=24%
GO_ACYL_COA_METABOLIC_PROCESS	GO_ACYL_COA_METABOLIC_PROCESS		76	0.248498	0.900388	0.585246	0.705687	1	4538	tags=21%, list=14%, signal=24%
GO_LYMPHOCYTE_APOPTOTIC_PROCESS	GO_LYMPHOCYTE_APOPTOTIC_PROCESS		18	0.328205	0.900355	0.592593	0.704829	1	5385	tags=28%, list=16%, signal=33%
GO_LIPOSACCHARIDE_METABOLIC_PROCESS	GO_LIPOSACCHARIDE_METABOLIC_PROCESS		110	0.23638	0.900154	0.578149	0.704262	1	7597	tags=29%, list=23%, signal=38%
GO_DNA_DEMETHYLATION	GO_DNA_DEMETHYLATION		15	0.311142	0.898357	0.586325	0.706446	1	6843	tags=33%, list=21%, signal=42%
GO_PROTEIN_TRIMERIZATION	GO_PROTEIN_TRIMERIZATION		38	0.284654	0.897805	0.56701	0.706491	1	1373	tags=16%, list=4%, signal=16%
GO_PHOSPHOLIPID_BIOSYNTHETIC_PROCESS	GO_PHOSPHOLIPID_BIOSYNTHETIC_PROCESS		227	0.204059	0.895954	0.626822	0.708739	1	5638	tags=21%, list=17%, signal=25%
GO_HYDROGEN_TRANSPORT	GO_HYDROGEN_TRANSPORT		131	0.251973	0.895756	0.547899	0.70815	1	10771	tags=42%, list=32%, signal=62%
GO_RIBOSOMAL_LARGE_SUBUNIT_BIOGENESIS	GO_RIBOSOMAL_LARGE_SUBUNIT_BIOGENESIS		48	0.353067	0.895064	0.572505	0.708495	1	5133	tags=31%, list=15%, signal=37%
GO_GLOBAL_GENOME_NUCLEOTIDE_EXCISION_REPAIR	GO_GLOBAL_GENOME_NUCLEOTIDE_EXCISION_REPAIR		32	0.293469	0.894409	0.592734	0.708698	1	6189	tags=28%, list=19%, signal=35%
GO_REGULATION_OF_STEM_CELL_POPULATION_MAINTENANCE	GO_REGULATION_OF_STEM_CELL_POPULATION_MAINTENANCE		17	0.310188	0.894265	0.627288	0.708061	1	8047	tags=35%, list=24%, signal=47%
GO_BLASTODERM_SEGMENTATION	GO_BLASTODERM_SEGMENTATION		15	0.310693	0.8942	0.629851	0.707269	1	9171	tags=40%, list=28%, signal=55%
GO_NUCLEAR_ENVELOPE_REASSEMBLY	GO_NUCLEAR_ENVELOPE_REASSEMBLY		17	0.344733	0.894177	0.588008	0.706409	1	3377	tags=29%, list=10%, signal=33%
GO_ENDOCYTIC_RECYCLING	GO_ENDOCYTIC_RECYCLING		23	0.286366	0.893489	0.631193	0.706713	1	2427	tags=17%, list=7%, signal=19%
GO_MALE_MEIOSIS_I	GO_MALE_MEIOSIS_I		15	0.316608	0.893469	0.608434	0.705852	1	1069	tags=13%, list=3%, signal=14%
GO_POSITIVE_REGULATION_OF_TISSUE_REMODELING	GO_POSITIVE_REGULATION_OF_TISSUE_REMODELING		23	0.306254	0.8929	0.602184	0.705941	1	3037	tags=22%, list=9%, signal=24%
GO_GRANULOCYTE_DIFFERENTIATION	GO_GRANULOCYTE_DIFFERENTIATION		15	0.317169	0.892742	0.605263	0.70532	1	4257	tags=27%, list=13%, signal=31%
GO_GLYCOSYL_COMPOUND_CATABOLIC_PROCESS	GO_GLYCOSYL_COMPOUND_CATABOLIC_PROCESS		40	0.259236	0.892	0.617834	0.7057	1	7360	tags=30%, list=22%, signal=38%
GO_AMINO_SUGAR_METABOLIC_PROCESS	GO_AMINO_SUGAR_METABOLIC_PROCESS		39	0.262805	0.891748	0.61051	0.705272	1	5878	tags=26%, list=18%, signal=31%
GO_COENZYME_A_METABOLIC_PROCESS	GO_COENZYME_A_METABOLIC_PROCESS		17	0.317239	0.891738	0.598291	0.704401	1	4387	tags=29%, list=13%, signal=34%
GO_EMBRYONIC_SKELETAL_SYSTEM_MORPHOGENESIS	GO_EMBRYONIC_SKELETAL_SYSTEM_MORPHOGENESIS		92	0.251027	0.890673	0.590844	0.705327	1	10588	tags=43%, list=32%, signal=64%
GO_POSITIVE_REGULATION_OF_PROTEIN_TYROSINE_KINASE_ACTIVITY	GO_POSITIVE_REGULATION_OF_PROTEIN_TYROSINE_KINASE_ACTIVITY		36	0.27608	0.889781	0.607988	0.705946	1	6438	tags=25%, list=19%, signal=31%
GO_FEMALE_GENITALIA_DEVELOPMENT	GO_FEMALE_GENITALIA_DEVELOPMENT		16	0.302426	0.889115	0.612335	0.706208	1	6408	tags=38%, list=19%, signal=46%
GO_POSITIVE_REGULATION_OF_CANONICAL_WNT_SIGNALING_PATHWAY	GO_POSITIVE_REGULATION_OF_CANONICAL_WNT_SIGNALING_PATHWAY		115	0.258643	0.889017	0.584691	0.705474	1	5114	tags=30%, list=15%, signal=35%
GO_PROTEIN_IMPORT_INTO_NUCLEUS_TRANSLOCATION	GO_PROTEIN_IMPORT_INTO_NUCLEUS_TRANSLOCATION		28	0.304638	0.888589	0.590136	0.705316	1	8588	tags=36%, list=26%, signal=48%
GO_NEGATIVE_REGULATION_OF_VIRAL_PROCESS	GO_NEGATIVE_REGULATION_OF_VIRAL_PROCESS		86	0.270359	0.887753	0.547697	0.705888	1	7740	tags=33%, list=23%, signal=42%
GO_PROTEIN_MATURATION	GO_PROTEIN_MATURATION		249	0.218759	0.887623	0.64881	0.705213	1	5592	tags=22%, list=17%, signal=26%
GO_REGULATION_OF_TYPE_I_INTERFERON_PRODUCTION	GO_REGULATION_OF_TYPE_I_INTERFERON_PRODUCTION		108	0.254728	0.884553	0.569177	0.70956	1	4563	tags=23%, list=14%, signal=27%
GO_NUCLEOSIDE_TRIPHOSPHATE_METABOLIC_PROCESS	GO_NUCLEOSIDE_TRIPHOSPHATE_METABOLIC_PROCESS		216	0.271599	0.883601	0.57963	0.710297	1	9278	tags=41%, list=28%, signal=56%
GO_PHOSPHATE_ION_TRANSPORT	GO_PHOSPHATE_ION_TRANSPORT		17	0.307458	0.883333	0.616482	0.709858	1	3814	tags=18%, list=11%, signal=20%
GO_NEGATIVE_REGULATION_OF_PROTEIN_BINDING	GO_NEGATIVE_REGULATION_OF_PROTEIN_BINDING		78	0.244377	0.883284	0.642405	0.709072	1	6301	tags=26%, list=19%, signal=32%
GO_AMINE_BIOSYNTHETIC_PROCESS	GO_AMINE_BIOSYNTHETIC_PROCESS		19	0.314105	0.879504	0.60356	0.714579	1	3240	tags=21%, list=10%, signal=23%
GO_OOGENESIS	GO_OOGENESIS		61	0.24195	0.879278	0.648649	0.714062	1	3720	tags=20%, list=11%, signal=22%
GO_ORGANIC_ACID_TRANSPORT	GO_ORGANIC_ACID_TRANSPORT		248	0.199086	0.879033	0.700258	0.713606	1	7770	tags=25%, list=23%, signal=33%
GO_VACUOLAR_ACIDIFICATION	GO_VACUOLAR_ACIDIFICATION		15	0.35141	0.878651	0.606957	0.713386	1	10623	tags=53%, list=32%, signal=78%
GO_EPITHELIAL_CILIUM_MOVEMENT	GO_EPITHELIAL_CILIUM_MOVEMENT		17	0.338275	0.876355	0.614213	0.716328	1	4889	tags=24%, list=15%, signal=28%
GO_REGULATION_OF_HEMATOPOIETIC_PROGENITOR_CELL_DIFFERENTIATION	GO_REGULATION_OF_HEMATOPOIETIC_PROGENITOR_CELL_DIFFERENTIATION		40	0.266135	0.876079	0.680282	0.715928	1	8935	tags=35%, list=27%, signal=48%
GO_COPPER_ION_TRANSPORT	GO_COPPER_ION_TRANSPORT		20	0.313638	0.875267	0.625954	0.716372	1	8776	tags=50%, list=26%, signal=68%
GO_FLAVONOID_METABOLIC_PROCESS	GO_FLAVONOID_METABOLIC_PROCESS		28	0.292444	0.872717	0.630747	0.719777	1	16802	tags=71%, list=51%, signal=144%
GO_MORPHOGENESIS_OF_EMBRYONIC_EPITHELIUM	GO_MORPHOGENESIS_OF_EMBRYONIC_EPITHELIUM		133	0.219682	0.872239	0.666667	0.719697	1	3578	tags=17%, list=11%, signal=18%
GO_LEUKOCYTE_MEDIATED_CYTOTOXICITY	GO_LEUKOCYTE_MEDIATED_CYTOTOXICITY		35	0.290533	0.871753	0.617834	0.719637	1	4903	tags=26%, list=15%, signal=30%
GO_SECONDARY_METABOLITE_BIOSYNTHETIC_PROCESS	GO_SECONDARY_METABOLITE_BIOSYNTHETIC_PROCESS		17	0.292765	0.87098	0.649254	0.720089	1	6974	tags=41%, list=21%, signal=52%
GO_POSITIVE_REGULATION_OF_MRNA_PROCESSING	GO_POSITIVE_REGULATION_OF_MRNA_PROCESSING		30	0.274423	0.870917	0.623711	0.719312	1	4421	tags=27%, list=13%, signal=31%
GO_CYTOLYSIS	GO_CYTOLYSIS		23	0.314661	0.867942	0.626817	0.723292	1	6229	tags=30%, list=19%, signal=37%
GO_POSITIVE_REGULATION_OF_EPIDERMAL_CELL_DIFFERENTIATION	GO_POSITIVE_REGULATION_OF_EPIDERMAL_CELL_DIFFERENTIATION		19	0.3012	0.863941	0.637084	0.729132	1	2930	tags=21%, list=9%, signal=23%
GO_O_GLYCAN_PROCESSING	GO_O_GLYCAN_PROCESSING		55	0.249829	0.863066	0.607463	0.729711	1	5932	tags=20%, list=18%, signal=24%
GO_RIBOSOMAL_SMALL_SUBUNIT_ASSEMBLY	GO_RIBOSOMAL_SMALL_SUBUNIT_ASSEMBLY		16	0.411166	0.862457	0.613767	0.729835	1	9421	tags=50%, list=28%, signal=70%
GO_ONE_CARBON_METABOLIC_PROCESS	GO_ONE_CARBON_METABOLIC_PROCESS		37	0.272432	0.862381	0.648318	0.729074	1	2849	tags=19%, list=9%, signal=21%
GO_KETONE_BIOSYNTHETIC_PROCESS	GO_KETONE_BIOSYNTHETIC_PROCESS		22	0.30628	0.859123	0.637729	0.733691	1	8790	tags=50%, list=26%, signal=68%
GO_PROTEIN_LOCALIZATION_TO_MITOCHONDRION	GO_PROTEIN_LOCALIZATION_TO_MITOCHONDRION		63	0.279377	0.858308	0.622018	0.734155	1	3941	tags=24%, list=12%, signal=27%
GO_MICROTUBULE_BUNDLE_FORMATION	GO_MICROTUBULE_BUNDLE_FORMATION		57	0.245593	0.857209	0.69514	0.735087	1	5507	tags=25%, list=17%, signal=29%
GO_BETA_CATENIN_DESTRUCTION_COMPLEX_DISASSEMBLY	GO_BETA_CATENIN_DESTRUCTION_COMPLEX_DISASSEMBLY		20	0.29504	0.852398	0.659016	0.742235	1	7306	tags=35%, list=22%, signal=45%
GO_CEREBRAL_CORTEX_NEURON_DIFFERENTIATION	GO_CEREBRAL_CORTEX_NEURON_DIFFERENTIATION		22	0.266504	0.851057	0.620588	0.743571	1	10132	tags=45%, list=30%, signal=65%
GO_GLYCEROLIPID_BIOSYNTHETIC_PROCESS	GO_GLYCEROLIPID_BIOSYNTHETIC_PROCESS		205	0.192603	0.850464	0.726619	0.743656	1	7597	tags=25%, list=23%, signal=33%
GO_PHOTORECEPTOR_CELL_DIFFERENTIATION	GO_PHOTORECEPTOR_CELL_DIFFERENTIATION		48	0.23587	0.84904	0.728218	0.745077	1	9728	tags=35%, list=29%, signal=50%
GO_N_ACETYLGLUCOSAMINE_METABOLIC_PROCESS	GO_N_ACETYLGLUCOSAMINE_METABOLIC_PROCESS		15	0.298124	0.847694	0.663265	0.746455	1	5759	tags=27%, list=17%, signal=32%
GO_HISTONE_DEUBIQUITINATION	GO_HISTONE_DEUBIQUITINATION		21	0.283662	0.845877	0.667857	0.748591	1	6006	tags=29%, list=18%, signal=35%
GO_EYE_PHOTORECEPTOR_CELL_DEVELOPMENT	GO_EYE_PHOTORECEPTOR_CELL_DEVELOPMENT		29	0.263066	0.844775	0.69986	0.749524	1	12732	tags=55%, list=38%, signal=89%
GO_OXIDOREDUCTION_COENZYME_METABOLIC_PROCESS	GO_OXIDOREDUCTION_COENZYME_METABOLIC_PROCESS		98	0.249586	0.844398	0.623311	0.74926	1	6134	tags=27%, list=18%, signal=32%
GO_NECROTIC_CELL_DEATH	GO_NECROTIC_CELL_DEATH		28	0.288163	0.844101	0.639576	0.74884	1	4720	tags=21%, list=14%, signal=25%
GO_CYTOPLASMIC_TRANSLATION	GO_CYTOPLASMIC_TRANSLATION		41	0.338378	0.842395	0.608696	0.750781	1	3323	tags=24%, list=10%, signal=27%
GO_VESICLE_COATING	GO_VESICLE_COATING		73	0.235887	0.842182	0.654321	0.750217	1	6626	tags=26%, list=20%, signal=32%
GO_NEGATIVE_REGULATION_OF_VIRAL_TRANSCRIPTION	GO_NEGATIVE_REGULATION_OF_VIRAL_TRANSCRIPTION		24	0.281256	0.841672	0.671096	0.750162	1	1640	tags=13%, list=5%, signal=13%
GO_MITOCHONDRIAL_RESPIRATORY_CHAIN_COMPLEX_ASSEMBLY	GO_MITOCHONDRIAL_RESPIRATORY_CHAIN_COMPLEX_ASSEMBLY		63	0.33047	0.840356	0.609284	0.751432	1	11575	tags=52%, list=35%, signal=80%
GO_CILIUM_MOVEMENT	GO_CILIUM_MOVEMENT		31	0.283696	0.837203	0.659306	0.755792	1	5507	tags=23%, list=17%, signal=27%
GO_NEGATIVE_REGULATION_OF_HEMATOPOIETIC_PROGENITOR_CELL_DIFFERENTIATION	GO_NEGATIVE_REGULATION_OF_HEMATOPOIETIC_PROGENITOR_CELL_DIFFERENTIATION		23	0.315233	0.836238	0.723611	0.756537	1	14878	tags=74%, list=45%, signal=134%
GO_OTIC_VESICLE_DEVELOPMENT	GO_OTIC_VESICLE_DEVELOPMENT		15	0.28163	0.835957	0.686478	0.756104	1	4809	tags=27%, list=14%, signal=31%
GO_NEURAL_RETINA_DEVELOPMENT	GO_NEURAL_RETINA_DEVELOPMENT		48	0.230053	0.835799	0.714286	0.755482	1	2740	tags=13%, list=8%, signal=14%
GO_REGULATION_OF_MULTI_ORGANISM_PROCESS	GO_REGULATION_OF_MULTI_ORGANISM_PROCESS		439	0.204891	0.834398	0.682035	0.756848	1	6471	tags=24%, list=19%, signal=29%
GO_MODULATION_BY_SYMBIONT_OF_HOST_CELLULAR_PROCESS	GO_MODULATION_BY_SYMBIONT_OF_HOST_CELLULAR_PROCESS		28	0.2733	0.826303	0.68547	0.769255	1	4870	tags=25%, list=15%, signal=29%
GO_ZINC_ION_HOMEOSTASIS	GO_ZINC_ION_HOMEOSTASIS		21	0.301386	0.825911	0.70059	0.768964	1	3082	tags=19%, list=9%, signal=21%
GO_RIBONUCLEOSIDE_DIPHOSPHATE_METABOLIC_PROCESS	GO_RIBONUCLEOSIDE_DIPHOSPHATE_METABOLIC_PROCESS		61	0.252806	0.825268	0.678082	0.769089	1	5081	tags=25%, list=15%, signal=29%
GO_REGULATION_OF_KERATINOCYTE_DIFFERENTIATION	GO_REGULATION_OF_KERATINOCYTE_DIFFERENTIATION		26	0.268258	0.824393	0.695205	0.769603	1	2930	tags=19%, list=9%, signal=21%
GO_POSITIVE_REGULATION_OF_LEUKOCYTE_APOPTOTIC_PROCESS	GO_POSITIVE_REGULATION_OF_LEUKOCYTE_APOPTOTIC_PROCESS		27	0.27299	0.823269	0.670455	0.770487	1	5062	tags=30%, list=15%, signal=35%
GO_REGULATION_OF_LYMPHOCYTE_MIGRATION	GO_REGULATION_OF_LYMPHOCYTE_MIGRATION		36	0.272151	0.823154	0.671192	0.76975	1	5777	tags=22%, list=17%, signal=27%
GO_REGULATION_OF_NOTCH_SIGNALING_PATHWAY	GO_REGULATION_OF_NOTCH_SIGNALING_PATHWAY		64	0.221681	0.820663	0.729378	0.773007	1	8431	tags=34%, list=25%, signal=46%
GO_DEFENSE_RESPONSE_TO_GRAM_POSITIVE_BACTERIUM	GO_DEFENSE_RESPONSE_TO_GRAM_POSITIVE_BACTERIUM		65	0.23964	0.818993	0.709774	0.774806	1	4072	tags=17%, list=12%, signal=19%
GO_REGULATION_OF_DEFENSE_RESPONSE_TO_VIRUS_BY_VIRUS	GO_REGULATION_OF_DEFENSE_RESPONSE_TO_VIRUS_BY_VIRUS		29	0.304495	0.818686	0.650092	0.774394	1	6423	tags=31%, list=19%, signal=38%
GO_REGULATION_OF_LYMPHOCYTE_APOPTOTIC_PROCESS	GO_REGULATION_OF_LYMPHOCYTE_APOPTOTIC_PROCESS		53	0.24824	0.818146	0.661972	0.774335	1	4720	tags=21%, list=14%, signal=24%
GO_EMBRYONIC_SKELETAL_SYSTEM_DEVELOPMENT	GO_EMBRYONIC_SKELETAL_SYSTEM_DEVELOPMENT		120	0.228667	0.817688	0.710564	0.774197	1	10397	tags=41%, list=31%, signal=59%
GO_PHOSPHATIDYLGLYCEROL_ACYL_CHAIN_REMODELING	GO_PHOSPHATIDYLGLYCEROL_ACYL_CHAIN_REMODELING		17	0.292809	0.817602	0.706241	0.773434	1	3029	tags=18%, list=9%, signal=19%
GO_FILOPODIUM_ASSEMBLY	GO_FILOPODIUM_ASSEMBLY		17	0.293902	0.81458	0.693878	0.777391	1	2788	tags=18%, list=8%, signal=19%
GO_REGULATION_OF_T_CELL_APOPTOTIC_PROCESS	GO_REGULATION_OF_T_CELL_APOPTOTIC_PROCESS		32	0.263639	0.812491	0.702619	0.779835	1	8702	tags=31%, list=26%, signal=42%
GO_GLUTAMATE_METABOLIC_PROCESS	GO_GLUTAMATE_METABOLIC_PROCESS		27	0.274854	0.806857	0.741985	0.787955	1	210	tags=7%, list=1%, signal=7%
GO_AROMATIC_AMINO_ACID_FAMILY_CATABOLIC_PROCESS	GO_AROMATIC_AMINO_ACID_FAMILY_CATABOLIC_PROCESS		19	0.269008	0.805171	0.707391	0.789842	1	12782	tags=68%, list=38%, signal=111%
GO_ALCOHOL_BIOSYNTHETIC_PROCESS	GO_ALCOHOL_BIOSYNTHETIC_PROCESS		106	0.213404	0.803806	0.698941	0.791112	1	5012	tags=20%, list=15%, signal=23%
GO_REGULATION_OF_EXECUTION_PHASE_OF_APOPTOSIS	GO_REGULATION_OF_EXECUTION_PHASE_OF_APOPTOSIS		24	0.255697	0.798493	0.756178	0.798643	1	8529	tags=42%, list=26%, signal=56%
GO_SINGLE_ORGANISM_MEMBRANE_BUDDING	GO_SINGLE_ORGANISM_MEMBRANE_BUDDING		71	0.227789	0.797042	0.710951	0.799996	1	6626	tags=25%, list=20%, signal=32%
GO_PLASMA_LIPOPROTEIN_PARTICLE_REMODELING	GO_PLASMA_LIPOPROTEIN_PARTICLE_REMODELING		24	0.281813	0.796219	0.7373	0.80035	1	4614	tags=21%, list=14%, signal=24%
GO_PROTEIN_LIPID_COMPLEX_REMODELING	GO_PROTEIN_LIPID_COMPLEX_REMODELING		24	0.281813	0.796219	0.7373	0.799424	1	4614	tags=21%, list=14%, signal=24%
GO_MACROMOLECULAR_COMPLEX_REMODELING	GO_MACROMOLECULAR_COMPLEX_REMODELING		24	0.281813	0.796218	0.7373	0.7985	1	4614	tags=21%, list=14%, signal=24%
GO_POSITIVE_REGULATION_OF_IMMUNOGLOBULIN_MEDIATED_IMMUNE_RESPONSE	GO_POSITIVE_REGULATION_OF_IMMUNOGLOBULIN_MEDIATED_IMMUNE_RESPONSE		25	0.285078	0.793624	0.717286	0.801714	1	2634	tags=20%, list=8%, signal=22%
GO_POSITIVE_REGULATION_OF_B_CELL_MEDIATED_IMMUNITY	GO_POSITIVE_REGULATION_OF_B_CELL_MEDIATED_IMMUNITY		25	0.285078	0.793624	0.717286	0.800789	1	2634	tags=20%, list=8%, signal=22%
GO_REGULATION_OF_CELLULAR_PH	GO_REGULATION_OF_CELLULAR_PH		72	0.208756	0.792662	0.771903	0.801388	1	8576	tags=29%, list=26%, signal=39%
GO_MITOCHONDRIAL_RESPIRATORY_CHAIN_COMPLEX_I_BIOGENESIS	GO_MITOCHONDRIAL_RESPIRATORY_CHAIN_COMPLEX_I_BIOGENESIS		51	0.323627	0.791314	0.631985	0.802592	1	11524	tags=53%, list=35%, signal=81%
GO_MITOCHONDRIAL_RESPIRATORY_CHAIN_COMPLEX_I_ASSEMBLY	GO_MITOCHONDRIAL_RESPIRATORY_CHAIN_COMPLEX_I_ASSEMBLY		51	0.323627	0.791314	0.631985	0.80167	1	11524	tags=53%, list=35%, signal=81%
GO_NADH_DEHYDROGENASE_COMPLEX_ASSEMBLY	GO_NADH_DEHYDROGENASE_COMPLEX_ASSEMBLY		51	0.323627	0.791313	0.631985	0.80075	1	11524	tags=53%, list=35%, signal=81%
GO_ACTIVATION_OF_INNATE_IMMUNE_RESPONSE	GO_ACTIVATION_OF_INNATE_IMMUNE_RESPONSE		199	0.230337	0.790647	0.679727	0.800861	1	5290	tags=23%, list=16%, signal=27%
GO_POSITIVE_REGULATION_OF_IMMUNOGLOBULIN_PRODUCTION	GO_POSITIVE_REGULATION_OF_IMMUNOGLOBULIN_PRODUCTION		30	0.272342	0.79028	0.700658	0.800551	1	2634	tags=17%, list=8%, signal=18%
GO_NEGATIVE_REGULATION_OF_RELEASE_OF_CYTOCHROME_C_FROM_MITOCHONDRIA	GO_NEGATIVE_REGULATION_OF_RELEASE_OF_CYTOCHROME_C_FROM_MITOCHONDRIA		17	0.297893	0.789424	0.738983	0.801037	1	4278	tags=29%, list=13%, signal=34%
GO_REGULATION_OF_DNA_TEMPLATED_TRANSCRIPTION_ELONGATION	GO_REGULATION_OF_DNA_TEMPLATED_TRANSCRIPTION_ELONGATION		39	0.23337	0.785604	0.762681	0.806046	1	6285	tags=23%, list=19%, signal=28%
GO_SULFUR_COMPOUND_BIOSYNTHETIC_PROCESS	GO_SULFUR_COMPOUND_BIOSYNTHETIC_PROCESS		194	0.194788	0.784654	0.839161	0.806633	1	9482	tags=36%, list=29%, signal=49%
GO_NEGATIVE_REGULATION_OF_DEFENSE_RESPONSE_TO_VIRUS	GO_NEGATIVE_REGULATION_OF_DEFENSE_RESPONSE_TO_VIRUS		17	0.27873	0.781547	0.748252	0.810467	1	10449	tags=47%, list=31%, signal=69%
GO_ORGANIC_CYCLIC_COMPOUND_CATABOLIC_PROCESS	GO_ORGANIC_CYCLIC_COMPOUND_CATABOLIC_PROCESS		408	0.203592	0.781065	0.688742	0.810308	1	5197	tags=20%, list=16%, signal=24%
GO_RNA_CATABOLIC_PROCESS	GO_RNA_CATABOLIC_PROCESS		216	0.242863	0.780501	0.657993	0.810228	1	3635	tags=18%, list=11%, signal=20%
GO_HYDROGEN_ION_TRANSMEMBRANE_TRANSPORT	GO_HYDROGEN_ION_TRANSMEMBRANE_TRANSPORT		100	0.239866	0.779568	0.691228	0.810742	1	8576	tags=34%, list=26%, signal=46%
GO_POSITIVE_REGULATION_OF_ORGANELLE_ASSEMBLY	GO_POSITIVE_REGULATION_OF_ORGANELLE_ASSEMBLY		42	0.226378	0.777443	0.77643	0.81312	1	2723	tags=14%, list=8%, signal=16%
GO_SULFUR_AMINO_ACID_BIOSYNTHETIC_PROCESS	GO_SULFUR_AMINO_ACID_BIOSYNTHETIC_PROCESS		19	0.280762	0.777269	0.750794	0.812473	1	4215	tags=26%, list=13%, signal=30%
GO_POSITIVE_REGULATION_OF_EPIDERMIS_DEVELOPMENT	GO_POSITIVE_REGULATION_OF_EPIDERMIS_DEVELOPMENT		31	0.260263	0.776815	0.773734	0.812294	1	3459	tags=16%, list=10%, signal=18%
GO_CHRONIC_INFLAMMATORY_RESPONSE	GO_CHRONIC_INFLAMMATORY_RESPONSE		15	0.316605	0.775984	0.72466	0.812657	1	1080	tags=13%, list=3%, signal=14%
GO_DNA_DEALKYLATION	GO_DNA_DEALKYLATION		20	0.253656	0.774761	0.762542	0.813573	1	8453	tags=30%, list=25%, signal=40%
GO_DEMETHYLATION	GO_DEMETHYLATION		52	0.221807	0.772436	0.77479	0.81613	1	6843	tags=29%, list=21%, signal=36%
GO_CARBOHYDRATE_PHOSPHORYLATION	GO_CARBOHYDRATE_PHOSPHORYLATION		20	0.273973	0.772019	0.772131	0.815836	1	2798	tags=20%, list=8%, signal=22%
GO_BRANCHING_INVOLVED_IN_MAMMARY_GLAND_DUCT_MORPHOGENESIS	GO_BRANCHING_INVOLVED_IN_MAMMARY_GLAND_DUCT_MORPHOGENESIS		20	0.275962	0.770228	0.763513	0.817696	1	5441	tags=25%, list=16%, signal=30%
GO_RESPONSE_TO_TUMOR_NECROSIS_FACTOR	GO_RESPONSE_TO_TUMOR_NECROSIS_FACTOR		221	0.221339	0.769717	0.714286	0.817512	1	5114	tags=21%, list=15%, signal=25%
GO_PYRIMIDINE_NUCLEOSIDE_CATABOLIC_PROCESS	GO_PYRIMIDINE_NUCLEOSIDE_CATABOLIC_PROCESS		19	0.262394	0.769054	0.73839	0.817589	1	7360	tags=26%, list=22%, signal=34%
GO_HEPARAN_SULFATE_PROTEOGLYCAN_BIOSYNTHETIC_PROCESS	GO_HEPARAN_SULFATE_PROTEOGLYCAN_BIOSYNTHETIC_PROCESS		23	0.260377	0.766543	0.778317	0.820341	1	10141	tags=48%, list=30%, signal=69%
GO_REVERSE_CHOLESTEROL_TRANSPORT	GO_REVERSE_CHOLESTEROL_TRANSPORT		17	0.277553	0.766293	0.764881	0.819794	1	3498	tags=18%, list=11%, signal=20%
GO_REGULATION_OF_RECEPTOR_BIOSYNTHETIC_PROCESS	GO_REGULATION_OF_RECEPTOR_BIOSYNTHETIC_PROCESS		21	0.258339	0.763745	0.78089	0.8227	1	5000	tags=24%, list=15%, signal=28%
GO_MODIFICATION_OF_MORPHOLOGY_OR_PHYSIOLOGY_OF_OTHER_ORGANISM	GO_MODIFICATION_OF_MORPHOLOGY_OR_PHYSIOLOGY_OF_OTHER_ORGANISM		94	0.203026	0.762854	0.781991	0.823119	1	2352	tags=12%, list=7%, signal=13%
GO_ASPARTATE_FAMILY_AMINO_ACID_BIOSYNTHETIC_PROCESS	GO_ASPARTATE_FAMILY_AMINO_ACID_BIOSYNTHETIC_PROCESS		23	0.258264	0.762687	0.781034	0.82247	1	9338	tags=43%, list=28%, signal=60%
GO_MITOCHONDRIAL_ELECTRON_TRANSPORT_CYTOCHROME_C_TO_OXYGEN	GO_MITOCHONDRIAL_ELECTRON_TRANSPORT_CYTOCHROME_C_TO_OXYGEN		16	0.339435	0.75867	0.685885	0.827562	1	8517	tags=38%, list=26%, signal=50%
GO_NEGATIVE_REGULATION_OF_GENE_SILENCING	GO_NEGATIVE_REGULATION_OF_GENE_SILENCING		18	0.249713	0.758224	0.792388	0.827277	1	8209	tags=33%, list=25%, signal=44%
GO_DEFENSE_RESPONSE_TO_OTHER_ORGANISM	GO_DEFENSE_RESPONSE_TO_OTHER_ORGANISM		436	0.195682	0.753815	0.755039	0.832896	1	5995	tags=20%, list=18%, signal=24%
GO_REGULATION_OF_VIRAL_RELEASE_FROM_HOST_CELL	GO_REGULATION_OF_VIRAL_RELEASE_FROM_HOST_CELL		31	0.250189	0.753398	0.782918	0.832629	1	4192	tags=19%, list=13%, signal=22%
GO_NADH_METABOLIC_PROCESS	GO_NADH_METABOLIC_PROCESS		33	0.271651	0.752876	0.713012	0.832467	1	9735	tags=42%, list=29%, signal=60%
GO_HEPARAN_SULFATE_PROTEOGLYCAN_METABOLIC_PROCESS	GO_HEPARAN_SULFATE_PROTEOGLYCAN_METABOLIC_PROCESS		28	0.258146	0.7527	0.774193	0.83183	1	10141	tags=46%, list=30%, signal=67%
GO_PIGMENT_GRANULE_LOCALIZATION	GO_PIGMENT_GRANULE_LOCALIZATION		23	0.244651	0.751918	0.802583	0.832089	1	1953	tags=13%, list=6%, signal=14%
GO_NEGATIVE_REGULATION_OF_LYMPHOCYTE_APOPTOTIC_PROCESS	GO_NEGATIVE_REGULATION_OF_LYMPHOCYTE_APOPTOTIC_PROCESS		27	0.253853	0.751738	0.794753	0.831424	1	6203	tags=26%, list=19%, signal=32%
GO_ESTABLISHMENT_OF_PROTEIN_LOCALIZATION_TO_ORGANELLE	GO_ESTABLISHMENT_OF_PROTEIN_LOCALIZATION_TO_ORGANELLE		345	0.208781	0.750779	0.720641	0.83192	1	4223	tags=17%, list=13%, signal=19%
GO_NUCLEOTIDE_EXCISION_REPAIR_PREINCISION_COMPLEX_ASSEMBLY	GO_NUCLEOTIDE_EXCISION_REPAIR_PREINCISION_COMPLEX_ASSEMBLY		29	0.260863	0.749561	0.761538	0.832727	1	7995	tags=34%, list=24%, signal=45%
GO_POSITIVE_REGULATION_OF_ORGANIC_ACID_TRANSPORT	GO_POSITIVE_REGULATION_OF_ORGANIC_ACID_TRANSPORT		29	0.212843	0.748123	0.835714	0.833947	1	2828	tags=10%, list=9%, signal=11%
GO_LIPOPOLYSACCHARIDE_MEDIATED_SIGNALING_PATHWAY	GO_LIPOPOLYSACCHARIDE_MEDIATED_SIGNALING_PATHWAY		31	0.274721	0.747788	0.729494	0.83353	1	3734	tags=19%, list=11%, signal=22%
GO_ALDITOL_PHOSPHATE_METABOLIC_PROCESS	GO_ALDITOL_PHOSPHATE_METABOLIC_PROCESS		34	0.229095	0.745167	0.813411	0.836392	1	2417	tags=15%, list=7%, signal=16%
GO_FAT_SOLUBLE_VITAMIN_METABOLIC_PROCESS	GO_FAT_SOLUBLE_VITAMIN_METABOLIC_PROCESS		31	0.222524	0.744995	0.813859	0.835705	1	15888	tags=52%, list=48%, signal=99%
GO_GLYCINE_METABOLIC_PROCESS	GO_GLYCINE_METABOLIC_PROCESS		18	0.254618	0.74443	0.774624	0.835607	1	986	tags=11%, list=3%, signal=11%
GO_NEURON_FATE_SPECIFICATION	GO_NEURON_FATE_SPECIFICATION		30	0.232414	0.743394	0.79113	0.836154	1	11751	tags=43%, list=35%, signal=67%
GO_NEGATIVE_REGULATION_OF_TELOMERE_MAINTENANCE	GO_NEGATIVE_REGULATION_OF_TELOMERE_MAINTENANCE		26	0.251791	0.742676	0.801852	0.836248	1	5939	tags=27%, list=18%, signal=33%
GO_REGULATION_OF_INTERFERON_GAMMA_BIOSYNTHETIC_PROCESS	GO_REGULATION_OF_INTERFERON_GAMMA_BIOSYNTHETIC_PROCESS		15	0.298239	0.740139	0.745455	0.83885	1	4257	tags=20%, list=13%, signal=23%
GO_OLIGOSACCHARIDE_METABOLIC_PROCESS	GO_OLIGOSACCHARIDE_METABOLIC_PROCESS		62	0.205494	0.735021	0.854325	0.845142	1	4928	tags=16%, list=15%, signal=19%
GO_T_CELL_RECEPTOR_SIGNALING_PATHWAY	GO_T_CELL_RECEPTOR_SIGNALING_PATHWAY		141	0.233931	0.733233	0.719643	0.84671	1	10201	tags=40%, list=31%, signal=57%
GO_REGULATION_OF_ICOSANOID_SECRETION	GO_REGULATION_OF_ICOSANOID_SECRETION		20	0.223869	0.73105	0.844311	0.848823	1	2828	tags=10%, list=9%, signal=11%
GO_REGULATION_OF_PROTEIN_TYROSINE_KINASE_ACTIVITY	GO_REGULATION_OF_PROTEIN_TYROSINE_KINASE_ACTIVITY		59	0.205065	0.729022	0.84115	0.850673	1	6438	tags=24%, list=19%, signal=29%
GO_NAD_METABOLIC_PROCESS	GO_NAD_METABOLIC_PROCESS		49	0.238129	0.725762	0.779514	0.854239	1	9044	tags=41%, list=27%, signal=56%
GO_NEGATIVE_REGULATION_OF_INTERLEUKIN_10_PRODUCTION	GO_NEGATIVE_REGULATION_OF_INTERLEUKIN_10_PRODUCTION		16	0.300711	0.725641	0.777958	0.853468	1	15130	tags=56%, list=45%, signal=103%
GO_SYNAPTIC_VESICLE_RECYCLING	GO_SYNAPTIC_VESICLE_RECYCLING		23	0.252277	0.722596	0.857571	0.856759	1	6069	tags=26%, list=18%, signal=32%
GO_NEGATIVE_REGULATION_OF_KIDNEY_DEVELOPMENT	GO_NEGATIVE_REGULATION_OF_KIDNEY_DEVELOPMENT		17	0.251923	0.721144	0.83982	0.857787	1	6429	tags=29%, list=19%, signal=36%
GO_PROTEIN_TRANSMEMBRANE_TRANSPORT	GO_PROTEIN_TRANSMEMBRANE_TRANSPORT		49	0.228035	0.714365	0.833929	0.866011	1	5757	tags=22%, list=17%, signal=27%
GO_NEGATIVE_REGULATION_OF_EPITHELIAL_CELL_DIFFERENTIATION	GO_NEGATIVE_REGULATION_OF_EPITHELIAL_CELL_DIFFERENTIATION		36	0.20184	0.713691	0.904422	0.865981	1	9351	tags=36%, list=28%, signal=50%
GO_POSITIVE_REGULATION_OF_TRANSCRIPTION_INITIATION_FROM_RNA_POLYMERASE_II_PROMOTER	GO_POSITIVE_REGULATION_OF_TRANSCRIPTION_INITIATION_FROM_RNA_POLYMERASE_II_PROMOTER		17	0.252715	0.708223	0.821963	0.872152	1	10402	tags=53%, list=31%, signal=77%
GO_POLYOL_CATABOLIC_PROCESS	GO_POLYOL_CATABOLIC_PROCESS		17	0.237417	0.705388	0.853832	0.874934	1	5345	tags=24%, list=16%, signal=28%
GO_BENZENE_CONTAINING_COMPOUND_METABOLIC_PROCESS	GO_BENZENE_CONTAINING_COMPOUND_METABOLIC_PROCESS		22	0.254933	0.703808	0.837446	0.876031	1	8702	tags=36%, list=26%, signal=49%
GO_ATP_HYDROLYSIS_COUPLED_TRANSMEMBRANE_TRANSPORT	GO_ATP_HYDROLYSIS_COUPLED_TRANSMEMBRANE_TRANSPORT		36	0.23044	0.702546	0.808374	0.876665	1	8576	tags=33%, list=26%, signal=45%
GO_POSITIVE_REGULATION_OF_INNATE_IMMUNE_RESPONSE	GO_POSITIVE_REGULATION_OF_INNATE_IMMUNE_RESPONSE		239	0.204235	0.700154	0.796265	0.878756	1	10460	tags=37%, list=31%, signal=54%
GO_REGULATION_OF_EXOSOMAL_SECRETION	GO_REGULATION_OF_EXOSOMAL_SECRETION		17	0.26251	0.699643	0.82037	0.87846	1	818	tags=12%, list=2%, signal=12%
GO_POSITIVE_REGULATION_OF_TRIGLYCERIDE_METABOLIC_PROCESS	GO_POSITIVE_REGULATION_OF_TRIGLYCERIDE_METABOLIC_PROCESS		20	0.248335	0.697067	0.832822	0.880806	1	6571	tags=25%, list=20%, signal=31%
GO_PHAGOSOME_MATURATION	GO_PHAGOSOME_MATURATION		36	0.232159	0.69168	0.837742	0.886641	1	8576	tags=33%, list=26%, signal=45%
GO_SENSORY_PERCEPTION_OF_CHEMICAL_STIMULUS	GO_SENSORY_PERCEPTION_OF_CHEMICAL_STIMULUS		123	0.166896	0.679985	0.936196	0.899622	1	15030	tags=45%, list=45%, signal=81%
GO_ANTIMICROBIAL_HUMORAL_RESPONSE	GO_ANTIMICROBIAL_HUMORAL_RESPONSE		46	0.197825	0.675616	0.852807	0.903821	1	9143	tags=22%, list=27%, signal=30%
GO_REGULATION_OF_INTERLEUKIN_2_BIOSYNTHETIC_PROCESS	GO_REGULATION_OF_INTERLEUKIN_2_BIOSYNTHETIC_PROCESS		18	0.275056	0.6739	0.80298	0.90483	1	1674	tags=17%, list=5%, signal=18%
GO_VITAMIN_TRANSPORT	GO_VITAMIN_TRANSPORT		30	0.213164	0.670987	0.891061	0.907129	1	6550	tags=20%, list=20%, signal=25%
GO_REGULATION_OF_INNATE_IMMUNE_RESPONSE	GO_REGULATION_OF_INNATE_IMMUNE_RESPONSE		332	0.189232	0.666593	0.845378	0.911094	1	5114	tags=19%, list=15%, signal=23%
GO_POSITIVE_REGULATION_OF_INTERLEUKIN_1_SECRETION	GO_POSITIVE_REGULATION_OF_INTERLEUKIN_1_SECRETION		24	0.239503	0.658769	0.834154	0.918494	1	10724	tags=38%, list=32%, signal=55%
GO_POSITIVE_REGULATION_OF_ADAPTIVE_IMMUNE_RESPONSE	GO_POSITIVE_REGULATION_OF_ADAPTIVE_IMMUNE_RESPONSE		72	0.213651	0.643825	0.863036	0.932732	1	8588	tags=33%, list=26%, signal=45%
GO_ADULT_WALKING_BEHAVIOR	GO_ADULT_WALKING_BEHAVIOR		30	0.200866	0.640734	0.918605	0.934749	1	5988	tags=20%, list=18%, signal=24%
GO_WALKING_BEHAVIOR	GO_WALKING_BEHAVIOR		30	0.200866	0.640734	0.918605	0.933755	1	5988	tags=20%, list=18%, signal=24%
GO_POSITIVE_REGULATION_OF_T_HELPER_1_TYPE_IMMUNE_RESPONSE	GO_POSITIVE_REGULATION_OF_T_HELPER_1_TYPE_IMMUNE_RESPONSE		15	0.259662	0.640343	0.8784	0.933151	1	9968	tags=40%, list=30%, signal=57%
GO_EYE_PHOTORECEPTOR_CELL_DIFFERENTIATION	GO_EYE_PHOTORECEPTOR_CELL_DIFFERENTIATION		40	0.184402	0.639578	0.942513	0.93292	1	12732	tags=48%, list=38%, signal=77%
GO_ATP_BIOSYNTHETIC_PROCESS	GO_ATP_BIOSYNTHETIC_PROCESS		32	0.234456	0.638087	0.800725	0.933368	1	8187	tags=38%, list=25%, signal=50%
GO_ESTROGEN_METABOLIC_PROCESS	GO_ESTROGEN_METABOLIC_PROCESS		23	0.22285	0.621072	0.920977	0.947875	1	9895	tags=39%, list=30%, signal=56%
GO_NEGATIVE_REGULATION_OF_INNATE_IMMUNE_RESPONSE	GO_NEGATIVE_REGULATION_OF_INNATE_IMMUNE_RESPONSE		36	0.212821	0.618753	0.872852	0.948896	1	10458	tags=44%, list=31%, signal=65%
GO_ATP_SYNTHESIS_COUPLED_PROTON_TRANSPORT	GO_ATP_SYNTHESIS_COUPLED_PROTON_TRANSPORT		23	0.251124	0.618679	0.806331	0.947964	1	8187	tags=39%, list=25%, signal=52%
GO_ENERGY_COUPLED_PROTON_TRANSPORT_DOWN_ELECTROCHEMICAL_GRADIENT	GO_ENERGY_COUPLED_PROTON_TRANSPORT_DOWN_ELECTROCHEMICAL_GRADIENT		23	0.251124	0.618679	0.806331	0.946963	1	8187	tags=39%, list=25%, signal=52%
GO_AXONEME_ASSEMBLY	GO_AXONEME_ASSEMBLY		35	0.198276	0.618308	0.929985	0.946277	1	12489	tags=49%, list=38%, signal=78%
GO_POSITIVE_REGULATION_OF_LYMPHOCYTE_MEDIATED_IMMUNITY	GO_POSITIVE_REGULATION_OF_LYMPHOCYTE_MEDIATED_IMMUNITY		67	0.203527	0.604839	0.872093	0.956248	1	6403	tags=22%, list=19%, signal=28%
GO_BILE_ACID_AND_BILE_SALT_TRANSPORT	GO_BILE_ACID_AND_BILE_SALT_TRANSPORT		29	0.181753	0.604435	0.95977	0.955567	1	10341	tags=34%, list=31%, signal=50%
GO_REGULATION_OF_PLASMA_LIPOPROTEIN_PARTICLE_LEVELS	GO_REGULATION_OF_PLASMA_LIPOPROTEIN_PARTICLE_LEVELS		45	0.183385	0.601737	0.94993	0.956608	1	8349	tags=29%, list=25%, signal=39%
GO_LIPID_DIGESTION	GO_LIPID_DIGESTION		22	0.206411	0.600887	0.945982	0.956235	1	9566	tags=32%, list=29%, signal=45%
GO_QUINONE_METABOLIC_PROCESS	GO_QUINONE_METABOLIC_PROCESS		29	0.212078	0.598385	0.922442	0.957043	1	9282	tags=28%, list=28%, signal=38%
GO_POSITIVE_REGULATION_OF_DNA_TEMPLATED_TRANSCRIPTION_ELONGATION	GO_POSITIVE_REGULATION_OF_DNA_TEMPLATED_TRANSCRIPTION_ELONGATION		22	0.211114	0.59822	0.936782	0.956158	1	1112	tags=9%, list=3%, signal=9%
GO_REGULATION_OF_HAIR_FOLLICLE_DEVELOPMENT	GO_REGULATION_OF_HAIR_FOLLICLE_DEVELOPMENT		15	0.223085	0.595908	0.939347	0.956823	1	3459	tags=13%, list=10%, signal=15%
GO_RESPONSE_TO_XENOBIOTIC_STIMULUS	GO_RESPONSE_TO_XENOBIOTIC_STIMULUS		102	0.160805	0.583492	0.972222	0.964388	1	6547	tags=19%, list=20%, signal=23%
GO_ISOPRENOID_METABOLIC_PROCESS	GO_ISOPRENOID_METABOLIC_PROCESS		120	0.149838	0.583043	0.977632	0.963655	1	8663	tags=22%, list=26%, signal=29%
GO_PEROXISOME_ORGANIZATION	GO_PEROXISOME_ORGANIZATION		33	0.184386	0.575099	0.938144	0.967626	1	9558	tags=33%, list=29%, signal=47%
GO_REGULATION_OF_T_CELL_MEDIATED_IMMUNITY	GO_REGULATION_OF_T_CELL_MEDIATED_IMMUNITY		50	0.187457	0.572411	0.923577	0.968247	1	5869	tags=22%, list=18%, signal=27%
GO_POSITIVE_REGULATION_OF_INSULIN_SECRETION_INVOLVED_IN_CELLULAR_RESPONSE_TO_GLUCOSE_STIMULUS	GO_POSITIVE_REGULATION_OF_INSULIN_SECRETION_INVOLVED_IN_CELLULAR_RESPONSE_TO_GLUCOSE_STIMULUS		26	0.177885	0.569305	0.960546	0.969089	1	14451	tags=54%, list=43%, signal=95%
GO_MITOCHONDRIAL_ATP_SYNTHESIS_COUPLED_PROTON_TRANSPORT	GO_MITOCHONDRIAL_ATP_SYNTHESIS_COUPLED_PROTON_TRANSPORT		17	0.264892	0.566965	0.867589	0.969456	1	8116	tags=41%, list=24%, signal=54%
GO_PLASMA_LIPOPROTEIN_PARTICLE_CLEARANCE	GO_PLASMA_LIPOPROTEIN_PARTICLE_CLEARANCE		21	0.201413	0.565941	0.946532	0.969047	1	9776	tags=38%, list=29%, signal=54%
GO_MULTI_ORGANISM_METABOLIC_PROCESS	GO_MULTI_ORGANISM_METABOLIC_PROCESS		136	0.214295	0.56527	0.826511	0.968419	1	3441	tags=13%, list=10%, signal=14%
GO_ELECTRON_TRANSPORT_CHAIN	GO_ELECTRON_TRANSPORT_CHAIN		91	0.206508	0.560879	0.84261	0.969808	1	10556	tags=42%, list=32%, signal=61%
GO_INTERFERON_GAMMA_MEDIATED_SIGNALING_PATHWAY	GO_INTERFERON_GAMMA_MEDIATED_SIGNALING_PATHWAY		68	0.207506	0.555613	0.853309	0.97159	1	5810	tags=19%, list=17%, signal=23%
GO_OXIDATIVE_PHOSPHORYLATION	GO_OXIDATIVE_PHOSPHORYLATION		80	0.21435	0.552845	0.835271	0.971949	1	10554	tags=41%, list=32%, signal=60%
GO_MITOCHONDRIAL_ELECTRON_TRANSPORT_NADH_TO_UBIQUINONE	GO_MITOCHONDRIAL_ELECTRON_TRANSPORT_NADH_TO_UBIQUINONE		41	0.228608	0.540031	0.854406	0.977016	1	11524	tags=49%, list=35%, signal=75%
GO_RIBOSOME_ASSEMBLY	GO_RIBOSOME_ASSEMBLY		50	0.212231	0.539945	0.87406	0.976043	1	9421	tags=38%, list=28%, signal=53%
GO_REGULATION_OF_T_HELPER_1_TYPE_IMMUNE_RESPONSE	GO_REGULATION_OF_T_HELPER_1_TYPE_IMMUNE_RESPONSE		22	0.208129	0.535862	0.930807	0.976758	1	9968	tags=36%, list=30%, signal=52%
GO_RESPONSE_TO_INTERFERON_GAMMA	GO_RESPONSE_TO_INTERFERON_GAMMA		140	0.173973	0.515134	0.917369	0.983632	1	5810	tags=16%, list=17%, signal=20%
GO_POSITIVE_REGULATION_OF_T_CELL_MEDIATED_CYTOTOXICITY	GO_POSITIVE_REGULATION_OF_T_CELL_MEDIATED_CYTOTOXICITY		15	0.210841	0.500086	0.947723	0.98735	1	9968	tags=40%, list=30%, signal=57%
GO_CHOLESTEROL_EFFLUX	GO_CHOLESTEROL_EFFLUX		26	0.165708	0.496058	0.975073	0.98746	1	15861	tags=62%, list=48%, signal=118%
GO_RENAL_SYSTEM_PROCESS_INVOLVED_IN_REGULATION_OF_BLOOD_VOLUME	GO_RENAL_SYSTEM_PROCESS_INVOLVED_IN_REGULATION_OF_BLOOD_VOLUME		16	0.162612	0.475124	0.995441	0.991435	1	10903	tags=31%, list=33%, signal=46%
GO_T_CELL_MEDIATED_IMMUNITY	GO_T_CELL_MEDIATED_IMMUNITY		28	0.157902	0.454772	0.981513	0.993964	1	9748	tags=25%, list=29%, signal=35%
GO_POSITIVE_REGULATION_OF_INTERLEUKIN_6_SECRETION	GO_POSITIVE_REGULATION_OF_INTERLEUKIN_6_SECRETION		15	0.178255	0.453228	0.987302	0.993172	1	13089	tags=47%, list=39%, signal=77%
GO_KERATINIZATION	GO_KERATINIZATION		46	0.130935	0.304426	0.997059	0.99984	1	28911	tags=100%, list=87%, signal=764%

## Sheet: C5-GO-MF
NAME	GS<br> follow link to MSigDB	GS DETAILS	SIZE	ES	NES	NOM p-val	FDR q-val	FWER p-val	RANK AT MAX	LEADING EDGE
GO_DEOXYRIBONUCLEASE_ACTIVITY	GO_DEOXYRIBONUCLEASE_ACTIVITY	Details ...	64	0.645445	2.1025	0	0.00835671	0.011	5197	tags=58%, list=16%, signal=68%
GO_ENDODEOXYRIBONUCLEASE_ACTIVITY	GO_ENDODEOXYRIBONUCLEASE_ACTIVITY	Details ...	49	0.625121	2.0125	0.00174216	0.0246223	0.063	5197	tags=55%, list=16%, signal=65%
GO_ENDONUCLEASE_ACTIVITY_ACTIVE_WITH_EITHER_RIBO_OR_DEOXYRIBONUCLEIC_ACIDS_AND_PRODUCING_5_PHOSPHOMONOESTERS	GO_ENDONUCLEASE_ACTIVITY_ACTIVE_WITH_EITHER_RIBO_OR_DEOXYRIBONUCLEIC_ACIDS_AND_PRODUCING_5_PHOSPHOMONOESTERS	Details ...	34	0.652997	1.91088	0.00386847	0.0732103	0.205	5384	tags=65%, list=16%, signal=77%
GO_DNA_DEPENDENT_ATPASE_ACTIVITY	GO_DNA_DEPENDENT_ATPASE_ACTIVITY	Details ...	78	0.619212	1.89286	0.00932836	0.0670653	0.238	3312	tags=42%, list=10%, signal=47%
GO_DNA_N_GLYCOSYLASE_ACTIVITY	GO_DNA_N_GLYCOSYLASE_ACTIVITY	Details ...	15	0.749204	1.86363	0	0.0775825	0.316	5009	tags=73%, list=15%, signal=86%
GO_TRNA_BINDING	GO_TRNA_BINDING	Details ...	43	0.629502	1.86221	0.00192678	0.0658252	0.323	5004	tags=53%, list=15%, signal=63%
GO_TRNA_METHYLTRANSFERASE_ACTIVITY	GO_TRNA_METHYLTRANSFERASE_ACTIVITY	Details ...	18	0.677495	1.85524	0.00191205	0.0627311	0.346	3283	tags=50%, list=10%, signal=55%
GO_DNA_HELICASE_ACTIVITY	GO_DNA_HELICASE_ACTIVITY	Details ...	53	0.640569	1.85249	0.00934579	0.0564985	0.352	2641	tags=45%, list=8%, signal=49%
GO_DNA_SECONDARY_STRUCTURE_BINDING	GO_DNA_SECONDARY_STRUCTURE_BINDING	Details ...	24	0.681721	1.82215	0.0114723	0.0738053	0.44	3312	tags=50%, list=10%, signal=55%
GO_HYDROLASE_ACTIVITY_HYDROLYZING_N_GLYCOSYL_COMPOUNDS	GO_HYDROLASE_ACTIVITY_HYDROLYZING_N_GLYCOSYL_COMPOUNDS	Details ...	22	0.62047	1.79949	0.0017301	0.0877352	0.528	5009	tags=50%, list=15%, signal=59%
GO_ORGANOPHOSPHATE_ESTER_TRANSMEMBRANE_TRANSPORTER_ACTIVITY	GO_ORGANOPHOSPHATE_ESTER_TRANSMEMBRANE_TRANSPORTER_ACTIVITY	Details ...	23	0.598182	1.79258	0.00932836	0.0859436	0.552	5153	tags=39%, list=15%, signal=46%
GO_NUCLEOBASE_CONTAINING_COMPOUND_TRANSMEMBRANE_TRANSPORTER_ACTIVITY	GO_NUCLEOBASE_CONTAINING_COMPOUND_TRANSMEMBRANE_TRANSPORTER_ACTIVITY	Details ...	31	0.555758	1.782	0.00914077	0.0876084	0.587	5888	tags=39%, list=18%, signal=47%
GO_NUCLEASE_ACTIVITY	GO_NUCLEASE_ACTIVITY	Details ...	186	0.45339	1.76861	0.0106195	0.0927748	0.632	7795	tags=47%, list=23%, signal=61%
GO_ENDONUCLEASE_ACTIVITY	GO_ENDONUCLEASE_ACTIVITY	Details ...	116	0.463621	1.76004	0.00683761	0.0951451	0.653	7774	tags=51%, list=23%, signal=66%
GO_ATP_DEPENDENT_MICROTUBULE_MOTOR_ACTIVITY	GO_ATP_DEPENDENT_MICROTUBULE_MOTOR_ACTIVITY	Details ...	18	0.665587	1.75487	0.0145985	0.093365	0.661	1047	tags=39%, list=3%, signal=40%
GO_PHOSPHATE_TRANSMEMBRANE_TRANSPORTER_ACTIVITY	GO_PHOSPHATE_TRANSMEMBRANE_TRANSPORTER_ACTIVITY	Details ...	30	0.530333	1.74498	0.0142602	0.0970084	0.687	700	tags=20%, list=2%, signal=20%
GO_NUCLEOTIDE_TRANSMEMBRANE_TRANSPORTER_ACTIVITY	GO_NUCLEOTIDE_TRANSMEMBRANE_TRANSPORTER_ACTIVITY	Details ...	19	0.595932	1.74233	0.00740741	0.0933028	0.694	700	tags=26%, list=2%, signal=27%
GO_EXONUCLEASE_ACTIVITY_ACTIVE_WITH_EITHER_RIBO_OR_DEOXYRIBONUCLEIC_ACIDS_AND_PRODUCING_5_PHOSPHOMONOESTERS	GO_EXONUCLEASE_ACTIVITY_ACTIVE_WITH_EITHER_RIBO_OR_DEOXYRIBONUCLEIC_ACIDS_AND_PRODUCING_5_PHOSPHOMONOESTERS	Details ...	40	0.557193	1.73737	0.014733	0.0922671	0.701	3504	tags=40%, list=11%, signal=45%
GO_TRNA_SPECIFIC_RIBONUCLEASE_ACTIVITY	GO_TRNA_SPECIFIC_RIBONUCLEASE_ACTIVITY	Details ...	16	0.706878	1.73317	0.0151229	0.0911257	0.712	5349	tags=75%, list=16%, signal=89%
GO_NUCLEOCYTOPLASMIC_TRANSPORTER_ACTIVITY	GO_NUCLEOCYTOPLASMIC_TRANSPORTER_ACTIVITY	Details ...	23	0.665146	1.70648	0.0215264	0.110862	0.782	3404	tags=43%, list=10%, signal=48%
GO_CARBOHYDRATE_DERIVATIVE_TRANSPORTER_ACTIVITY	GO_CARBOHYDRATE_DERIVATIVE_TRANSPORTER_ACTIVITY		35	0.541911	1.70007	0.0194004	0.113186	0.796	5888	tags=37%, list=18%, signal=45%
GO_ACYLGLYCEROL_O_ACYLTRANSFERASE_ACTIVITY	GO_ACYLGLYCEROL_O_ACYLTRANSFERASE_ACTIVITY		25	0.564163	1.68793	0.0128	0.121101	0.825	6861	tags=44%, list=21%, signal=55%
GO_ATP_DEPENDENT_DNA_HELICASE_ACTIVITY	GO_ATP_DEPENDENT_DNA_HELICASE_ACTIVITY		34	0.599366	1.67882	0.0366795	0.125474	0.837	2641	tags=38%, list=8%, signal=41%
GO_ENDORIBONUCLEASE_ACTIVITY_PRODUCING_5_PHOSPHOMONOESTERS	GO_ENDORIBONUCLEASE_ACTIVITY_PRODUCING_5_PHOSPHOMONOESTERS		26	0.622444	1.67358	0.0291262	0.126079	0.843	5384	tags=58%, list=16%, signal=69%
GO_FOUR_WAY_JUNCTION_DNA_BINDING	GO_FOUR_WAY_JUNCTION_DNA_BINDING		15	0.704742	1.66956	0.0310078	0.125404	0.847	3312	tags=53%, list=10%, signal=59%
GO_DAMAGED_DNA_BINDING	GO_DAMAGED_DNA_BINDING		62	0.510752	1.65605	0.0384615	0.135247	0.869	5525	tags=48%, list=17%, signal=58%
GO_ENDONUCLEASE_ACTIVITY_ACTIVE_WITH_EITHER_RIBO_OR_DEOXYRIBONUCLEIC_ACIDS_AND_PRODUCING_3_PHOSPHOMONOESTERS	GO_ENDONUCLEASE_ACTIVITY_ACTIVE_WITH_EITHER_RIBO_OR_DEOXYRIBONUCLEIC_ACIDS_AND_PRODUCING_3_PHOSPHOMONOESTERS		17	0.603669	1.65327	0.017331	0.133258	0.875	4717	tags=71%, list=14%, signal=82%
GO_EXONUCLEASE_ACTIVITY	GO_EXONUCLEASE_ACTIVITY		71	0.47741	1.6527	0.0217786	0.129067	0.877	3635	tags=34%, list=11%, signal=38%
GO_SULFUR_COMPOUND_TRANSMEMBRANE_TRANSPORTER_ACTIVITY	GO_SULFUR_COMPOUND_TRANSMEMBRANE_TRANSPORTER_ACTIVITY		25	0.499429	1.63819	0.0254491	0.141546	0.898	7258	tags=40%, list=22%, signal=51%
GO_LIGASE_ACTIVITY_FORMING_CARBON_OXYGEN_BONDS	GO_LIGASE_ACTIVITY_FORMING_CARBON_OXYGEN_BONDS		44	0.578417	1.63471	0.0349265	0.140802	0.906	6099	tags=55%, list=18%, signal=67%
GO_TRANSITION_METAL_ION_TRANSMEMBRANE_TRANSPORTER_ACTIVITY	GO_TRANSITION_METAL_ION_TRANSMEMBRANE_TRANSPORTER_ACTIVITY		39	0.512147	1.6242	0.0182724	0.147618	0.915	9067	tags=59%, list=27%, signal=81%
GO_LYSOPHOSPHOLIPID_ACYLTRANSFERASE_ACTIVITY	GO_LYSOPHOSPHOLIPID_ACYLTRANSFERASE_ACTIVITY		17	0.578309	1.62296	0.0217391	0.144468	0.915	6861	tags=47%, list=21%, signal=59%
GO_MANNOSYLTRANSFERASE_ACTIVITY	GO_MANNOSYLTRANSFERASE_ACTIVITY		25	0.53427	1.62239	0.0220994	0.140665	0.916	8302	tags=56%, list=25%, signal=75%
GO_NUCLEOSOME_BINDING	GO_NUCLEOSOME_BINDING		44	0.544542	1.62069	0.0383212	0.138386	0.92	5501	tags=41%, list=17%, signal=49%
GO_O_ACYLTRANSFERASE_ACTIVITY	GO_O_ACYLTRANSFERASE_ACTIVITY		44	0.463346	1.61341	0.0223881	0.142752	0.927	6861	tags=34%, list=21%, signal=43%
GO_HYDROLASE_ACTIVITY_ACTING_ON_GLYCOSYL_BONDS	GO_HYDROLASE_ACTIVITY_ACTING_ON_GLYCOSYL_BONDS		111	0.401609	1.60992	0.0212766	0.142431	0.932	5009	tags=30%, list=15%, signal=35%
GO_AMIDE_TRANSMEMBRANE_TRANSPORTER_ACTIVITY	GO_AMIDE_TRANSMEMBRANE_TRANSPORTER_ACTIVITY		18	0.57878	1.60283	0.0376432	0.146351	0.934	3280	tags=39%, list=10%, signal=43%
GO_NUCLEOSOMAL_DNA_BINDING	GO_NUCLEOSOMAL_DNA_BINDING		29	0.593853	1.60172	0.0546448	0.143565	0.935	6431	tags=52%, list=19%, signal=64%
GO_INTRAMOLECULAR_TRANSFERASE_ACTIVITY	GO_INTRAMOLECULAR_TRANSFERASE_ACTIVITY		26	0.5457	1.59695	0.0374332	0.145746	0.94	4308	tags=50%, list=13%, signal=57%
GO_TRANSFERASE_ACTIVITY_TRANSFERRING_ONE_CARBON_GROUPS	GO_TRANSFERASE_ACTIVITY_TRANSFERRING_ONE_CARBON_GROUPS		189	0.39602	1.5726	0.00985222	0.171428	0.953	5061	tags=37%, list=15%, signal=43%
GO_TRANSFERASE_ACTIVITY_TRANSFERRING_PENTOSYL_GROUPS	GO_TRANSFERASE_ACTIVITY_TRANSFERRING_PENTOSYL_GROUPS		50	0.443813	1.57129	0.0224359	0.168825	0.953	4637	tags=34%, list=14%, signal=39%
GO_ORGANIC_ACID_SODIUM_SYMPORTER_ACTIVITY	GO_ORGANIC_ACID_SODIUM_SYMPORTER_ACTIVITY		30	0.475435	1.57051	0.0251046	0.16576	0.954	10922	tags=50%, list=33%, signal=74%
GO_HISTONE_KINASE_ACTIVITY	GO_HISTONE_KINASE_ACTIVITY		18	0.623327	1.569	0.0648649	0.163785	0.954	1514	tags=50%, list=5%, signal=52%
GO_HELICASE_ACTIVITY	GO_HELICASE_ACTIVITY		151	0.467172	1.56878	0.0697248	0.16027	0.954	3788	tags=34%, list=11%, signal=38%
GO_NUCLEOTIDYLTRANSFERASE_ACTIVITY	GO_NUCLEOTIDYLTRANSFERASE_ACTIVITY		120	0.433738	1.55429	0.0442478	0.174703	0.966	6144	tags=40%, list=18%, signal=49%
GO_RNA_METHYLTRANSFERASE_ACTIVITY	GO_RNA_METHYLTRANSFERASE_ACTIVITY		39	0.499731	1.55065	0.0371747	0.17539	0.966	5388	tags=46%, list=16%, signal=55%
GO_ZINC_ION_TRANSMEMBRANE_TRANSPORTER_ACTIVITY	GO_ZINC_ION_TRANSMEMBRANE_TRANSPORTER_ACTIVITY		23	0.535824	1.54502	0.0522979	0.178561	0.966	3959	tags=39%, list=12%, signal=44%
GO_SNRNA_BINDING	GO_SNRNA_BINDING		33	0.511686	1.54419	0.0652174	0.176059	0.966	4641	tags=42%, list=14%, signal=49%
GO_PURINE_NTP_DEPENDENT_HELICASE_ACTIVITY	GO_PURINE_NTP_DEPENDENT_HELICASE_ACTIVITY		97	0.46457	1.5292	0.0807339	0.191838	0.977	5444	tags=37%, list=16%, signal=44%
GO_STRUCTURE_SPECIFIC_DNA_BINDING	GO_STRUCTURE_SPECIFIC_DNA_BINDING		114	0.414806	1.52273	0.0525424	0.196419	0.978	3312	tags=28%, list=10%, signal=31%
GO_NF_KAPPAB_BINDING	GO_NF_KAPPAB_BINDING		30	0.497332	1.52105	0.0484429	0.194848	0.978	5000	tags=43%, list=15%, signal=51%
GO_DNA_DIRECTED_DNA_POLYMERASE_ACTIVITY	GO_DNA_DIRECTED_DNA_POLYMERASE_ACTIVITY		25	0.517415	1.51759	0.0751445	0.195605	0.979	3298	tags=36%, list=10%, signal=40%
GO_SINGLE_STRANDED_DNA_BINDING	GO_SINGLE_STRANDED_DNA_BINDING		84	0.46307	1.5165	0.0892193	0.193393	0.979	4005	tags=35%, list=12%, signal=39%
GO_TRANSFERASE_ACTIVITY_TRANSFERRING_ACYL_GROUPS_OTHER_THAN_AMINO_ACYL_GROUPS	GO_TRANSFERASE_ACTIVITY_TRANSFERRING_ACYL_GROUPS_OTHER_THAN_AMINO_ACYL_GROUPS		196	0.360196	1.51543	0.0181818	0.191244	0.98	6926	tags=35%, list=21%, signal=44%
GO_CYCLIN_DEPENDENT_PROTEIN_SERINE_THREONINE_KINASE_REGULATOR_ACTIVITY	GO_CYCLIN_DEPENDENT_PROTEIN_SERINE_THREONINE_KINASE_REGULATOR_ACTIVITY		27	0.490685	1.51357	0.0538194	0.190231	0.982	3677	tags=37%, list=11%, signal=42%
GO_RIBONUCLEASE_ACTIVITY	GO_RIBONUCLEASE_ACTIVITY		86	0.41355	1.50577	0.0634921	0.197177	0.985	7625	tags=44%, list=23%, signal=57%
GO_POLY_PYRIMIDINE_TRACT_BINDING	GO_POLY_PYRIMIDINE_TRACT_BINDING		17	0.556167	1.5049	0.0622711	0.194943	0.985	4421	tags=41%, list=13%, signal=47%
GO_DNA_POLYMERASE_ACTIVITY	GO_DNA_POLYMERASE_ACTIVITY		32	0.492113	1.50186	0.0743494	0.195392	0.987	5004	tags=41%, list=15%, signal=48%
GO_VOLTAGE_GATED_ANION_CHANNEL_ACTIVITY	GO_VOLTAGE_GATED_ANION_CHANNEL_ACTIVITY		17	0.494562	1.49734	0.0633562	0.198129	0.987	3714	tags=29%, list=11%, signal=33%
GO_THREONINE_TYPE_PEPTIDASE_ACTIVITY	GO_THREONINE_TYPE_PEPTIDASE_ACTIVITY		20	0.687237	1.49676	0.0980392	0.19568	0.987	9407	tags=90%, list=28%, signal=125%
GO_MICROTUBULE_MOTOR_ACTIVITY	GO_MICROTUBULE_MOTOR_ACTIVITY		75	0.438917	1.48582	0.0752864	0.207077	0.991	1672	tags=24%, list=5%, signal=25%
GO_ENDORIBONUCLEASE_ACTIVITY	GO_ENDORIBONUCLEASE_ACTIVITY		45	0.449134	1.4833	0.08	0.207049	0.991	5384	tags=44%, list=16%, signal=53%
GO_ISOMERASE_ACTIVITY	GO_ISOMERASE_ACTIVITY		142	0.396229	1.4808	0.045	0.206804	0.991	4308	tags=34%, list=13%, signal=39%
GO_ATPASE_ACTIVITY	GO_ATPASE_ACTIVITY		418	0.366606	1.4778	0.0487421	0.20706	0.992	3545	tags=24%, list=11%, signal=27%
GO_S_ACYLTRANSFERASE_ACTIVITY	GO_S_ACYLTRANSFERASE_ACTIVITY		29	0.463856	1.47214	0.0753065	0.211229	0.993	5443	tags=41%, list=16%, signal=49%
GO_UNFOLDED_PROTEIN_BINDING	GO_UNFOLDED_PROTEIN_BINDING		94	0.451063	1.46771	0.0963222	0.214062	0.993	4255	tags=33%, list=13%, signal=38%
GO_CYCLIN_DEPENDENT_PROTEIN_KINASE_ACTIVITY	GO_CYCLIN_DEPENDENT_PROTEIN_KINASE_ACTIVITY		34	0.437725	1.46229	0.0632479	0.217951	0.993	3677	tags=29%, list=11%, signal=33%
GO_TRANSFERASE_ACTIVITY_TRANSFERRING_ACYL_GROUPS	GO_TRANSFERASE_ACTIVITY_TRANSFERRING_ACYL_GROUPS		232	0.340046	1.46119	0.0279823	0.216162	0.993	6644	tags=32%, list=20%, signal=40%
GO_PRE_MRNA_BINDING	GO_PRE_MRNA_BINDING		24	0.529822	1.45988	0.0907372	0.214618	0.993	981	tags=29%, list=3%, signal=30%
GO_METHYL_CPG_BINDING	GO_METHYL_CPG_BINDING		15	0.557811	1.45762	0.0873016	0.214229	0.993	1872	tags=47%, list=6%, signal=49%
GO_DISULFIDE_OXIDOREDUCTASE_ACTIVITY	GO_DISULFIDE_OXIDOREDUCTASE_ACTIVITY		28	0.500462	1.44532	0.116928	0.227897	0.995	6810	tags=46%, list=20%, signal=58%
GO_COFACTOR_TRANSPORTER_ACTIVITY	GO_COFACTOR_TRANSPORTER_ACTIVITY		21	0.465553	1.44136	0.0642978	0.230353	0.996	3688	tags=33%, list=11%, signal=37%
GO_3_5_EXONUCLEASE_ACTIVITY	GO_3_5_EXONUCLEASE_ACTIVITY		45	0.449397	1.43637	0.0722222	0.234399	0.996	2898	tags=29%, list=9%, signal=32%
GO_PALMITOYLTRANSFERASE_ACTIVITY	GO_PALMITOYLTRANSFERASE_ACTIVITY		36	0.432728	1.433	0.0888502	0.236065	0.997	3344	tags=28%, list=10%, signal=31%
GO_AMINO_ACID_TRANSMEMBRANE_TRANSPORTER_ACTIVITY	GO_AMINO_ACID_TRANSMEMBRANE_TRANSPORTER_ACTIVITY		76	0.370154	1.42032	0.0561151	0.251326	0.998	7658	tags=34%, list=23%, signal=44%
GO_O_METHYLTRANSFERASE_ACTIVITY	GO_O_METHYLTRANSFERASE_ACTIVITY		15	0.54464	1.41803	0.0831858	0.25146	0.999	8283	tags=73%, list=25%, signal=98%
GO_S_ADENOSYLMETHIONINE_DEPENDENT_METHYLTRANSFERASE_ACTIVITY	GO_S_ADENOSYLMETHIONINE_DEPENDENT_METHYLTRANSFERASE_ACTIVITY		116	0.365108	1.40503	0.0692432	0.267815	0.999	6013	tags=39%, list=18%, signal=47%
GO_ATPASE_ACTIVITY_COUPLED	GO_ATPASE_ACTIVITY_COUPLED		309	0.348026	1.40263	0.0696594	0.267757	0.999	3545	tags=23%, list=11%, signal=25%
GO_LIGASE_ACTIVITY_FORMING_CARBON_NITROGEN_BONDS	GO_LIGASE_ACTIVITY_FORMING_CARBON_NITROGEN_BONDS		51	0.408496	1.38054	0.0942149	0.298707	1	7638	tags=45%, list=23%, signal=58%
GO_ACETYLTRANSFERASE_ACTIVITY	GO_ACETYLTRANSFERASE_ACTIVITY		94	0.361056	1.37548	0.0832025	0.302892	1	6926	tags=39%, list=21%, signal=50%
GO_ORGANIC_ACID_TRANSMEMBRANE_TRANSPORTER_ACTIVITY	GO_ORGANIC_ACID_TRANSMEMBRANE_TRANSPORTER_ACTIVITY		136	0.319517	1.36252	0.0778364	0.32086	1	8943	tags=34%, list=27%, signal=46%
GO_RNA_POLYMERASE_ACTIVITY	GO_RNA_POLYMERASE_ACTIVITY		42	0.462394	1.3587	0.140036	0.323283	1	7222	tags=48%, list=22%, signal=61%
GO_ADENYLYLTRANSFERASE_ACTIVITY	GO_ADENYLYLTRANSFERASE_ACTIVITY		23	0.439358	1.35866	0.117338	0.31944	1	6144	tags=43%, list=18%, signal=53%
GO_DICARBOXYLIC_ACID_TRANSMEMBRANE_TRANSPORTER_ACTIVITY	GO_DICARBOXYLIC_ACID_TRANSMEMBRANE_TRANSPORTER_ACTIVITY		33	0.382654	1.35513	0.101597	0.321266	1	7258	tags=30%, list=22%, signal=39%
GO_ANION_ANION_ANTIPORTER_ACTIVITY	GO_ANION_ANION_ANTIPORTER_ACTIVITY		21	0.414109	1.35427	0.109677	0.31902	1	74	tags=10%, list=0%, signal=10%
GO_ORGANIC_ANION_TRANSMEMBRANE_TRANSPORTER_ACTIVITY	GO_ORGANIC_ANION_TRANSMEMBRANE_TRANSPORTER_ACTIVITY		170	0.303866	1.34867	0.0701531	0.324678	1	8528	tags=31%, list=26%, signal=41%
GO_EXORIBONUCLEASE_ACTIVITY	GO_EXORIBONUCLEASE_ACTIVITY		32	0.421856	1.34683	0.140221	0.323878	1	3635	tags=28%, list=11%, signal=32%
GO_CIS_TRANS_ISOMERASE_ACTIVITY	GO_CIS_TRANS_ISOMERASE_ACTIVITY		38	0.423731	1.33926	0.136678	0.332916	1	3485	tags=32%, list=10%, signal=35%
GO_MHC_CLASS_I_PROTEIN_BINDING	GO_MHC_CLASS_I_PROTEIN_BINDING		19	0.550489	1.33115	0.182674	0.342939	1	3280	tags=32%, list=10%, signal=35%
GO_HYDROLASE_ACTIVITY_ACTING_ON_CARBON_NITROGEN_BUT_NOT_PEPTIDE_BONDS_IN_CYCLIC_AMIDINES	GO_HYDROLASE_ACTIVITY_ACTING_ON_CARBON_NITROGEN_BUT_NOT_PEPTIDE_BONDS_IN_CYCLIC_AMIDINES		33	0.409178	1.32668	0.14966	0.346837	1	7360	tags=42%, list=22%, signal=54%
GO_INTRAMOLECULAR_OXIDOREDUCTASE_ACTIVITY_TRANSPOSING_S_S_BONDS	GO_INTRAMOLECULAR_OXIDOREDUCTASE_ACTIVITY_TRANSPOSING_S_S_BONDS		19	0.506182	1.32454	0.162011	0.346627	1	6725	tags=53%, list=20%, signal=66%
GO_RNA_POLYMERASE_II_CARBOXY_TERMINAL_DOMAIN_KINASE_ACTIVITY	GO_RNA_POLYMERASE_II_CARBOXY_TERMINAL_DOMAIN_KINASE_ACTIVITY		16	0.505814	1.32434	0.17795	0.343168	1	3778	tags=31%, list=11%, signal=35%
GO_PROTEIN_METHYLTRANSFERASE_ACTIVITY	GO_PROTEIN_METHYLTRANSFERASE_ACTIVITY		66	0.369894	1.32313	0.120661	0.341769	1	6568	tags=41%, list=20%, signal=51%
GO_N_ACETYLTRANSFERASE_ACTIVITY	GO_N_ACETYLTRANSFERASE_ACTIVITY		78	0.358605	1.32121	0.0993485	0.341284	1	6926	tags=40%, list=21%, signal=50%
GO_SOLUTE_SODIUM_SYMPORTER_ACTIVITY	GO_SOLUTE_SODIUM_SYMPORTER_ACTIVITY		50	0.372155	1.32121	0.122016	0.337697	1	10922	tags=44%, list=33%, signal=65%
GO_L_AMINO_ACID_TRANSMEMBRANE_TRANSPORTER_ACTIVITY	GO_L_AMINO_ACID_TRANSMEMBRANE_TRANSPORTER_ACTIVITY		53	0.353612	1.31273	0.129927	0.348519	1	7169	tags=30%, list=22%, signal=38%
GO_SNORNA_BINDING	GO_SNORNA_BINDING		25	0.501242	1.30404	0.207939	0.359805	1	10076	tags=72%, list=30%, signal=103%
GO_RAN_GTPASE_BINDING	GO_RAN_GTPASE_BINDING		31	0.477686	1.30128	0.209139	0.36085	1	4178	tags=42%, list=13%, signal=48%
GO_HYDROLASE_ACTIVITY_HYDROLYZING_O_GLYCOSYL_COMPOUNDS	GO_HYDROLASE_ACTIVITY_HYDROLYZING_O_GLYCOSYL_COMPOUNDS		86	0.339366	1.29912	0.146538	0.360739	1	4994	tags=24%, list=15%, signal=29%
GO_DEAMINASE_ACTIVITY	GO_DEAMINASE_ACTIVITY		33	0.379635	1.2958	0.15235	0.362923	1	7360	tags=39%, list=22%, signal=51%
GO_HISTONE_LYSINE_N_METHYLTRANSFERASE_ACTIVITY	GO_HISTONE_LYSINE_N_METHYLTRANSFERASE_ACTIVITY		35	0.406706	1.29439	0.188742	0.362094	1	1943	tags=29%, list=6%, signal=30%
GO_SOLUTE_PROTON_SYMPORTER_ACTIVITY	GO_SOLUTE_PROTON_SYMPORTER_ACTIVITY		26	0.417715	1.28713	0.166667	0.370994	1	9808	tags=50%, list=29%, signal=71%
GO_SOLUTE_CATION_SYMPORTER_ACTIVITY	GO_SOLUTE_CATION_SYMPORTER_ACTIVITY		96	0.326159	1.28338	0.126984	0.374092	1	10922	tags=41%, list=33%, signal=60%
GO_TRANSFERASE_ACTIVITY_TRANSFERRING_NITROGENOUS_GROUPS	GO_TRANSFERASE_ACTIVITY_TRANSFERRING_NITROGENOUS_GROUPS		19	0.441662	1.27992	0.198319	0.376502	1	5259	tags=37%, list=16%, signal=44%
GO_N_ACYLTRANSFERASE_ACTIVITY	GO_N_ACYLTRANSFERASE_ACTIVITY		94	0.328524	1.2774	0.143084	0.377233	1	6926	tags=35%, list=21%, signal=44%
GO_OXIDOREDUCTASE_ACTIVITY_ACTING_ON_PAIRED_DONORS_WITH_INCORPORATION_OR_REDUCTION_OF_MOLECULAR_OXYGEN_2_OXOGLUTARATE_AS_ONE_DONOR_AND_INCORPORATION_OF_ONE_ATOM_EACH_OF_OXYGEN_INTO_BOTH_DONORS	GO_OXIDOREDUCTASE_ACTIVITY_ACTING_ON_PAIRED_DONORS_WITH_INCORPORATION_OR_REDUCTION_OF_MOLECULAR_OXYGEN_2_OXOGLUTARATE_AS_ONE_DONOR_AND_INCORPORATION_OF_ONE_ATOM_EACH_OF_OXYGEN_INTO_BOTH_DONORS		39	0.383337	1.27329	0.153439	0.380871	1	5043	tags=31%, list=15%, signal=36%
GO_LYSINE_N_METHYLTRANSFERASE_ACTIVITY	GO_LYSINE_N_METHYLTRANSFERASE_ACTIVITY		42	0.37913	1.27238	0.168919	0.379043	1	1943	tags=26%, list=6%, signal=28%
GO_P53_BINDING	GO_P53_BINDING		66	0.367049	1.26822	0.160256	0.382821	1	3155	tags=30%, list=9%, signal=33%
GO_4_IRON_4_SULFUR_CLUSTER_BINDING	GO_4_IRON_4_SULFUR_CLUSTER_BINDING		40	0.411967	1.25738	0.199637	0.398517	1	1936	tags=28%, list=6%, signal=29%
GO_FMN_BINDING	GO_FMN_BINDING		15	0.441055	1.25586	0.189655	0.397545	1	5496	tags=27%, list=17%, signal=32%
GO_UBIQUITIN_LIKE_PROTEIN_CONJUGATING_ENZYME_ACTIVITY	GO_UBIQUITIN_LIKE_PROTEIN_CONJUGATING_ENZYME_ACTIVITY		29	0.426333	1.23191	0.220339	0.436701	1	4437	tags=34%, list=13%, signal=40%
GO_TRANSFERASE_ACTIVITY_TRANSFERRING_HEXOSYL_GROUPS	GO_TRANSFERASE_ACTIVITY_TRANSFERRING_HEXOSYL_GROUPS		186	0.300916	1.23064	0.169075	0.435227	1	8965	tags=38%, list=27%, signal=52%
GO_TRANSFERASE_ACTIVITY_TRANSFERRING_GLYCOSYL_GROUPS	GO_TRANSFERASE_ACTIVITY_TRANSFERRING_GLYCOSYL_GROUPS		259	0.283016	1.22187	0.155271	0.447585	1	5288	tags=24%, list=16%, signal=29%
GO_RNA_HELICASE_ACTIVITY	GO_RNA_HELICASE_ACTIVITY		67	0.374216	1.22039	0.236332	0.446473	1	6656	tags=36%, list=20%, signal=45%
GO_CARBOXY_LYASE_ACTIVITY	GO_CARBOXY_LYASE_ACTIVITY		33	0.35591	1.21725	0.207729	0.44846	1	6800	tags=36%, list=20%, signal=46%
GO_HSP90_PROTEIN_BINDING	GO_HSP90_PROTEIN_BINDING		27	0.376515	1.21294	0.233161	0.452788	1	6243	tags=33%, list=19%, signal=41%
GO_GLUCOSYLTRANSFERASE_ACTIVITY	GO_GLUCOSYLTRANSFERASE_ACTIVITY		16	0.421833	1.19754	0.242685	0.478479	1	7597	tags=63%, list=23%, signal=81%
GO_NUCLEOBASE_CONTAINING_COMPOUND_KINASE_ACTIVITY	GO_NUCLEOBASE_CONTAINING_COMPOUND_KINASE_ACTIVITY		46	0.345653	1.19215	0.223549	0.484905	1	5639	tags=35%, list=17%, signal=42%
GO_N_METHYLTRANSFERASE_ACTIVITY	GO_N_METHYLTRANSFERASE_ACTIVITY		72	0.328264	1.19088	0.233723	0.483316	1	6568	tags=36%, list=20%, signal=45%
GO_CATION_AMINO_ACID_SYMPORTER_ACTIVITY	GO_CATION_AMINO_ACID_SYMPORTER_ACTIVITY		16	0.409038	1.18825	0.270833	0.484266	1	11981	tags=50%, list=36%, signal=78%
GO_POLYPEPTIDE_N_ACETYLGALACTOSAMINYLTRANSFERASE_ACTIVITY	GO_POLYPEPTIDE_N_ACETYLGALACTOSAMINYLTRANSFERASE_ACTIVITY		16	0.426908	1.18705	0.264274	0.482476	1	2626	tags=25%, list=8%, signal=27%
GO_HISTONE_METHYLTRANSFERASE_ACTIVITY	GO_HISTONE_METHYLTRANSFERASE_ACTIVITY		48	0.363503	1.18595	0.24547	0.480644	1	2715	tags=27%, list=8%, signal=29%
GO_DNA_BINDING_BENDING	GO_DNA_BINDING_BENDING		20	0.4062	1.17891	0.273906	0.490193	1	8843	tags=45%, list=27%, signal=61%
GO_NUCLEOSIDE_DIPHOSPHATE_KINASE_ACTIVITY	GO_NUCLEOSIDE_DIPHOSPHATE_KINASE_ACTIVITY		16	0.4525	1.17875	0.262436	0.486501	1	4391	tags=38%, list=13%, signal=43%
GO_OXIDOREDUCTASE_ACTIVITY_ACTING_ON_THE_CH_CH_GROUP_OF_DONORS_NAD_OR_NADP_AS_ACCEPTOR	GO_OXIDOREDUCTASE_ACTIVITY_ACTING_ON_THE_CH_CH_GROUP_OF_DONORS_NAD_OR_NADP_AS_ACCEPTOR		24	0.420634	1.17862	0.260097	0.482785	1	7438	tags=42%, list=22%, signal=54%
GO_PHOSPHOTRANSFERASE_ACTIVITY_FOR_OTHER_SUBSTITUTED_PHOSPHATE_GROUPS	GO_PHOSPHOTRANSFERASE_ACTIVITY_FOR_OTHER_SUBSTITUTED_PHOSPHATE_GROUPS		19	0.420279	1.1772	0.256809	0.48169	1	8618	tags=47%, list=26%, signal=64%
GO_HISTONE_BINDING	GO_HISTONE_BINDING		166	0.316475	1.17361	0.295533	0.48472	1	5877	tags=31%, list=18%, signal=38%
GO_MOTOR_ACTIVITY	GO_MOTOR_ACTIVITY		129	0.312145	1.16944	0.24424	0.488581	1	1672	tags=16%, list=5%, signal=16%
GO_CYSTEINE_TYPE_ENDOPEPTIDASE_ACTIVITY_INVOLVED_IN_APOPTOTIC_PROCESS	GO_CYSTEINE_TYPE_ENDOPEPTIDASE_ACTIVITY_INVOLVED_IN_APOPTOTIC_PROCESS		15	0.4495	1.16917	0.305243	0.485306	1	5107	tags=40%, list=15%, signal=47%
GO_TELOMERIC_DNA_BINDING	GO_TELOMERIC_DNA_BINDING		29	0.383397	1.16836	0.248214	0.483057	1	5939	tags=38%, list=18%, signal=46%
GO_DRUG_TRANSPORTER_ACTIVITY	GO_DRUG_TRANSPORTER_ACTIVITY		20	0.385081	1.16251	0.260116	0.490138	1	1623	tags=25%, list=5%, signal=26%
GO_RIBONUCLEOPROTEIN_COMPLEX_BINDING	GO_RIBONUCLEOPROTEIN_COMPLEX_BINDING		89	0.340448	1.15916	0.28877	0.492534	1	6013	tags=38%, list=18%, signal=47%
GO_METAL_CLUSTER_BINDING	GO_METAL_CLUSTER_BINDING		62	0.356004	1.15341	0.287958	0.499713	1	1936	tags=23%, list=6%, signal=24%
GO_CHROMATIN_BINDING	GO_CHROMATIN_BINDING		413	0.280708	1.14525	0.284779	0.511302	1	3368	tags=22%, list=10%, signal=24%
GO_OXIDOREDUCTASE_ACTIVITY_ACTING_ON_THE_CH_CH_GROUP_OF_DONORS	GO_OXIDOREDUCTASE_ACTIVITY_ACTING_ON_THE_CH_CH_GROUP_OF_DONORS		55	0.349923	1.13347	0.317742	0.528973	1	7869	tags=38%, list=24%, signal=50%
GO_HSP70_PROTEIN_BINDING	GO_HSP70_PROTEIN_BINDING		29	0.363474	1.12005	0.309441	0.551392	1	4121	tags=28%, list=12%, signal=31%
GO_L_ASCORBIC_ACID_BINDING	GO_L_ASCORBIC_ACID_BINDING		17	0.423524	1.1198	0.340782	0.547944	1	4220	tags=29%, list=13%, signal=34%
GO_INTRAMOLECULAR_OXIDOREDUCTASE_ACTIVITY	GO_INTRAMOLECULAR_OXIDOREDUCTASE_ACTIVITY		49	0.351781	1.11812	0.321918	0.546999	1	7086	tags=43%, list=21%, signal=54%
GO_THIOLESTER_HYDROLASE_ACTIVITY	GO_THIOLESTER_HYDROLASE_ACTIVITY		32	0.318176	1.09905	0.348797	0.580782	1	2971	tags=25%, list=9%, signal=27%
GO_HYDROLASE_ACTIVITY_ACTING_ON_CARBON_NITROGEN_BUT_NOT_PEPTIDE_BONDS	GO_HYDROLASE_ACTIVITY_ACTING_ON_CARBON_NITROGEN_BUT_NOT_PEPTIDE_BONDS		142	0.25725	1.09579	0.284916	0.58314	1	5760	tags=27%, list=17%, signal=32%
GO_HEAT_SHOCK_PROTEIN_BINDING	GO_HEAT_SHOCK_PROTEIN_BINDING		87	0.311067	1.09547	0.338462	0.579698	1	4341	tags=29%, list=13%, signal=33%
GO_MICROFILAMENT_MOTOR_ACTIVITY	GO_MICROFILAMENT_MOTOR_ACTIVITY		21	0.397387	1.08615	0.377207	0.594079	1	10864	tags=43%, list=33%, signal=64%
GO_CALCIUM_DEPENDENT_CYSTEINE_TYPE_ENDOPEPTIDASE_ACTIVITY	GO_CALCIUM_DEPENDENT_CYSTEINE_TYPE_ENDOPEPTIDASE_ACTIVITY		19	0.395343	1.08314	0.392256	0.595961	1	6395	tags=26%, list=19%, signal=33%
GO_HYDROGEN_EXPORTING_ATPASE_ACTIVITY	GO_HYDROGEN_EXPORTING_ATPASE_ACTIVITY		26	0.397113	1.07972	0.375218	0.598812	1	8352	tags=42%, list=25%, signal=56%
GO_ANION_TRANSMEMBRANE_TRANSPORTER_ACTIVITY	GO_ANION_TRANSMEMBRANE_TRANSPORTER_ACTIVITY		280	0.243769	1.07798	0.339109	0.598018	1	9147	tags=30%, list=28%, signal=42%
GO_ACETYLGLUCOSAMINYLTRANSFERASE_ACTIVITY	GO_ACETYLGLUCOSAMINYLTRANSFERASE_ACTIVITY		44	0.318647	1.07462	0.359756	0.600424	1	6361	tags=30%, list=19%, signal=36%
GO_NEUROTRANSMITTER_BINDING	GO_NEUROTRANSMITTER_BINDING		29	0.312383	1.07407	0.376731	0.597398	1	8943	tags=34%, list=27%, signal=47%
GO_LIGASE_ACTIVITY	GO_LIGASE_ACTIVITY		377	0.256172	1.07348	0.352291	0.594639	1	6241	tags=28%, list=19%, signal=34%
GO_PYRIDOXAL_PHOSPHATE_BINDING	GO_PYRIDOXAL_PHOSPHATE_BINDING		45	0.294425	1.07003	0.349206	0.597114	1	5953	tags=27%, list=18%, signal=32%
GO_ACID_AMINO_ACID_LIGASE_ACTIVITY	GO_ACID_AMINO_ACID_LIGASE_ACTIVITY		18	0.376632	1.06939	0.358643	0.594337	1	4192	tags=28%, list=13%, signal=32%
GO_MHC_PROTEIN_BINDING	GO_MHC_PROTEIN_BINDING		28	0.444573	1.0691	0.453008	0.590957	1	3280	tags=25%, list=10%, signal=28%
GO_PROTEIN_DISULFIDE_OXIDOREDUCTASE_ACTIVITY	GO_PROTEIN_DISULFIDE_OXIDOREDUCTASE_ACTIVITY		21	0.384067	1.06538	0.395147	0.594325	1	6810	tags=38%, list=20%, signal=48%
GO_CHROMATIN_DNA_BINDING	GO_CHROMATIN_DNA_BINDING		76	0.295512	1.06413	0.359797	0.59285	1	6431	tags=33%, list=19%, signal=41%
GO_CARBON_OXYGEN_LYASE_ACTIVITY	GO_CARBON_OXYGEN_LYASE_ACTIVITY		64	0.30159	1.05988	0.370943	0.597001	1	6431	tags=33%, list=19%, signal=41%
GO_CHAPERONE_BINDING	GO_CHAPERONE_BINDING		78	0.312136	1.05298	0.401754	0.606375	1	3037	tags=27%, list=9%, signal=30%
GO_TASTE_RECEPTOR_ACTIVITY	GO_TASTE_RECEPTOR_ACTIVITY		20	0.426337	1.05099	0.448183	0.606384	1	16690	tags=80%, list=50%, signal=160%
GO_ANION_CATION_SYMPORTER_ACTIVITY	GO_ANION_CATION_SYMPORTER_ACTIVITY		51	0.288025	1.04714	0.405512	0.609847	1	10922	tags=35%, list=33%, signal=52%
GO_BETA_1_3_GALACTOSYLTRANSFERASE_ACTIVITY	GO_BETA_1_3_GALACTOSYLTRANSFERASE_ACTIVITY		15	0.395342	1.04335	0.433775	0.613414	1	7881	tags=40%, list=24%, signal=52%
GO_CARBOXYLIC_ESTER_HYDROLASE_ACTIVITY	GO_CARBOXYLIC_ESTER_HYDROLASE_ACTIVITY		128	0.249049	1.04027	0.4	0.615672	1	6351	tags=25%, list=19%, signal=31%
GO_SECONDARY_ACTIVE_TRANSMEMBRANE_TRANSPORTER_ACTIVITY	GO_SECONDARY_ACTIVE_TRANSMEMBRANE_TRANSPORTER_ACTIVITY		221	0.235452	1.04016	0.397959	0.612035	1	9147	tags=29%, list=28%, signal=40%
GO_INORGANIC_ANION_EXCHANGER_ACTIVITY	GO_INORGANIC_ANION_EXCHANGER_ACTIVITY		18	0.337771	1.03884	0.435171	0.610802	1	50	tags=6%, list=0%, signal=6%
GO_COA_HYDROLASE_ACTIVITY	GO_COA_HYDROLASE_ACTIVITY		20	0.327155	1.0326	0.433862	0.618502	1	4387	tags=25%, list=13%, signal=29%
GO_NAD_ADP_RIBOSYLTRANSFERASE_ACTIVITY	GO_NAD_ADP_RIBOSYLTRANSFERASE_ACTIVITY		25	0.339425	1.03246	0.409253	0.614986	1	3848	tags=24%, list=12%, signal=27%
GO_MACROLIDE_BINDING	GO_MACROLIDE_BINDING		18	0.390217	1.02968	0.427807	0.616389	1	3050	tags=28%, list=9%, signal=31%
GO_FK506_BINDING	GO_FK506_BINDING		18	0.390217	1.02968	0.427807	0.612653	1	3050	tags=28%, list=9%, signal=31%
GO_SYMPORTER_ACTIVITY	GO_SYMPORTER_ACTIVITY		137	0.245355	1.0285	0.425258	0.611167	1	9001	tags=30%, list=27%, signal=41%
GO_PROTEASOME_BINDING	GO_PROTEASOME_BINDING		16	0.413917	1.01092	0.463504	0.63997	1	9007	tags=56%, list=27%, signal=77%
GO_MONOCARBOXYLIC_ACID_TRANSMEMBRANE_TRANSPORTER_ACTIVITY	GO_MONOCARBOXYLIC_ACID_TRANSMEMBRANE_TRANSPORTER_ACTIVITY		43	0.276669	1.00526	0.444767	0.64691	1	8943	tags=33%, list=27%, signal=44%
GO_UDP_GLYCOSYLTRANSFERASE_ACTIVITY	GO_UDP_GLYCOSYLTRANSFERASE_ACTIVITY		127	0.24814	0.999185	0.45788	0.65441	1	8858	tags=33%, list=27%, signal=45%
GO_NEUROTRANSMITTER_TRANSPORTER_ACTIVITY	GO_NEUROTRANSMITTER_TRANSPORTER_ACTIVITY		23	0.321179	0.983845	0.509943	0.679551	1	13453	tags=52%, list=40%, signal=88%
GO_ACETYLGALACTOSAMINYLTRANSFERASE_ACTIVITY	GO_ACETYLGALACTOSAMINYLTRANSFERASE_ACTIVITY		31	0.32281	0.983195	0.499213	0.676803	1	2661	tags=23%, list=8%, signal=25%
GO_PHOSPHOPROTEIN_BINDING	GO_PHOSPHOPROTEIN_BINDING		59	0.265151	0.981818	0.483819	0.675407	1	4903	tags=29%, list=15%, signal=34%
GO_METHYLATED_HISTONE_BINDING	GO_METHYLATED_HISTONE_BINDING		47	0.294775	0.977203	0.475499	0.680301	1	6403	tags=34%, list=19%, signal=42%
GO_UDP_GALACTOSYLTRANSFERASE_ACTIVITY	GO_UDP_GALACTOSYLTRANSFERASE_ACTIVITY		25	0.328981	0.973042	0.504777	0.684128	1	8793	tags=40%, list=26%, signal=54%
GO_DOUBLE_STRANDED_RNA_BINDING	GO_DOUBLE_STRANDED_RNA_BINDING		59	0.30276	0.964837	0.502655	0.69554	1	6712	tags=34%, list=20%, signal=42%
GO_GALACTOSYLTRANSFERASE_ACTIVITY	GO_GALACTOSYLTRANSFERASE_ACTIVITY		29	0.317	0.961034	0.508914	0.698717	1	8793	tags=41%, list=26%, signal=56%
GO_OXIDOREDUCTASE_ACTIVITY_ACTING_ON_A_SULFUR_GROUP_OF_DONORS	GO_OXIDOREDUCTASE_ACTIVITY_ACTING_ON_A_SULFUR_GROUP_OF_DONORS		45	0.305657	0.956046	0.501724	0.704157	1	6810	tags=33%, list=20%, signal=42%
GO_MODIFIED_AMINO_ACID_TRANSMEMBRANE_TRANSPORTER_ACTIVITY	GO_MODIFIED_AMINO_ACID_TRANSMEMBRANE_TRANSPORTER_ACTIVITY		16	0.334222	0.954793	0.516129	0.702531	1	7658	tags=38%, list=23%, signal=49%
GO_SUMO_TRANSFERASE_ACTIVITY	GO_SUMO_TRANSFERASE_ACTIVITY		15	0.349598	0.954367	0.532663	0.699357	1	4043	tags=33%, list=12%, signal=38%
GO_PEPTIDE_N_ACETYLTRANSFERASE_ACTIVITY	GO_PEPTIDE_N_ACETYLTRANSFERASE_ACTIVITY		58	0.273673	0.953755	0.513513	0.696569	1	6499	tags=34%, list=20%, signal=43%
GO_NEUROTRANSMITTER_SODIUM_SYMPORTER_ACTIVITY	GO_NEUROTRANSMITTER_SODIUM_SYMPORTER_ACTIVITY		18	0.335331	0.946167	0.529915	0.706695	1	16173	tags=72%, list=49%, signal=141%
GO_OXIDOREDUCTASE_ACTIVITY_ACTING_ON_THE_CH_NH_GROUP_OF_DONORS_NAD_OR_NADP_AS_ACCEPTOR	GO_OXIDOREDUCTASE_ACTIVITY_ACTING_ON_THE_CH_NH_GROUP_OF_DONORS_NAD_OR_NADP_AS_ACCEPTOR		19	0.32541	0.945935	0.523636	0.703273	1	6503	tags=42%, list=20%, signal=52%
GO_BITTER_TASTE_RECEPTOR_ACTIVITY	GO_BITTER_TASTE_RECEPTOR_ACTIVITY		16	0.410109	0.937881	0.622641	0.714146	1	16690	tags=75%, list=50%, signal=150%
GO_NEUTRAL_AMINO_ACID_TRANSMEMBRANE_TRANSPORTER_ACTIVITY	GO_NEUTRAL_AMINO_ACID_TRANSMEMBRANE_TRANSPORTER_ACTIVITY		31	0.287469	0.927339	0.575114	0.72983	1	7169	tags=26%, list=22%, signal=33%
GO_AMINOPEPTIDASE_ACTIVITY	GO_AMINOPEPTIDASE_ACTIVITY		39	0.26941	0.925036	0.570325	0.730205	1	3188	tags=15%, list=10%, signal=17%
GO_RNA_POLYMERASE_III_ACTIVITY	GO_RNA_POLYMERASE_III_ACTIVITY		18	0.358731	0.924412	0.551601	0.727522	1	13193	tags=78%, list=40%, signal=129%
GO_HORMONE_ACTIVITY	GO_HORMONE_ACTIVITY		94	0.234625	0.920486	0.582798	0.730812	1	12003	tags=39%, list=36%, signal=61%
GO_PHOSPHOLIPASE_A2_ACTIVITY	GO_PHOSPHOLIPASE_A2_ACTIVITY		30	0.277318	0.920397	0.59621	0.727109	1	4614	tags=23%, list=14%, signal=27%
GO_TRANSLATION_INITIATION_FACTOR_BINDING	GO_TRANSLATION_INITIATION_FACTOR_BINDING		27	0.300843	0.919321	0.546763	0.725261	1	3323	tags=22%, list=10%, signal=25%
GO_LIPOPOLYSACCHARIDE_BINDING	GO_LIPOPOLYSACCHARIDE_BINDING		20	0.346604	0.907594	0.554077	0.742151	1	5550	tags=35%, list=17%, signal=42%
GO_CARBON_CARBON_LYASE_ACTIVITY	GO_CARBON_CARBON_LYASE_ACTIVITY		48	0.250615	0.89922	0.594295	0.753383	1	7154	tags=31%, list=22%, signal=40%
GO_VITAMIN_TRANSPORTER_ACTIVITY	GO_VITAMIN_TRANSPORTER_ACTIVITY		20	0.305981	0.896178	0.595679	0.75489	1	427	tags=10%, list=1%, signal=10%
GO_CATION_SUGAR_SYMPORTER_ACTIVITY	GO_CATION_SUGAR_SYMPORTER_ACTIVITY		15	0.33355	0.887092	0.596552	0.767221	1	2834	tags=20%, list=9%, signal=22%
GO_OLFACTORY_RECEPTOR_ACTIVITY	GO_OLFACTORY_RECEPTOR_ACTIVITY		46	0.259224	0.886378	0.607387	0.764633	1	13303	tags=43%, list=40%, signal=72%
GO_KINESIN_BINDING	GO_KINESIN_BINDING		30	0.292601	0.884737	0.621262	0.763674	1	3307	tags=20%, list=10%, signal=22%
GO_PHOSPHATASE_INHIBITOR_ACTIVITY	GO_PHOSPHATASE_INHIBITOR_ACTIVITY		34	0.278975	0.881584	0.630372	0.765454	1	10113	tags=47%, list=30%, signal=68%
GO_ACTIVE_TRANSMEMBRANE_TRANSPORTER_ACTIVITY	GO_ACTIVE_TRANSMEMBRANE_TRANSPORTER_ACTIVITY		341	0.19373	0.870263	0.697616	0.781353	1	9001	tags=28%, list=27%, signal=39%
GO_BILE_ACID_TRANSMEMBRANE_TRANSPORTER_ACTIVITY	GO_BILE_ACID_TRANSMEMBRANE_TRANSPORTER_ACTIVITY		15	0.31136	0.869149	0.628225	0.779306	1	12108	tags=40%, list=36%, signal=63%
GO_ACETYLCHOLINE_BINDING	GO_ACETYLCHOLINE_BINDING		23	0.267795	0.865919	0.656033	0.780889	1	6892	tags=22%, list=21%, signal=27%
GO_ALDO_KETO_REDUCTASE_NADP_ACTIVITY	GO_ALDO_KETO_REDUCTASE_NADP_ACTIVITY		26	0.316642	0.863945	0.618321	0.780484	1	4819	tags=23%, list=14%, signal=27%
GO_VITAMIN_BINDING	GO_VITAMIN_BINDING		75	0.224636	0.857018	0.687943	0.788462	1	1681	tags=11%, list=5%, signal=11%
GO_SODIUM_INDEPENDENT_ORGANIC_ANION_TRANSMEMBRANE_TRANSPORTER_ACTIVITY	GO_SODIUM_INDEPENDENT_ORGANIC_ANION_TRANSMEMBRANE_TRANSPORTER_ACTIVITY		18	0.288889	0.836267	0.662873	0.821461	1	9147	tags=28%, list=28%, signal=38%
GO_PEPTIDE_ANTIGEN_BINDING	GO_PEPTIDE_ANTIGEN_BINDING		29	0.347583	0.827805	0.608614	0.832283	1	9432	tags=38%, list=28%, signal=53%
GO_SIGNAL_SEQUENCE_BINDING	GO_SIGNAL_SEQUENCE_BINDING		37	0.269005	0.822346	0.701599	0.837713	1	1835	tags=14%, list=6%, signal=14%
GO_MACROMOLECULE_TRANSMEMBRANE_TRANSPORTER_ACTIVITY	GO_MACROMOLECULE_TRANSMEMBRANE_TRANSPORTER_ACTIVITY		20	0.293934	0.820326	0.6787	0.837178	1	3037	tags=25%, list=9%, signal=27%
GO_TRANSFERASE_ACTIVITY_TRANSFERRING_AMINO_ACYL_GROUPS	GO_TRANSFERASE_ACTIVITY_TRANSFERRING_AMINO_ACYL_GROUPS		24	0.268765	0.813501	0.719599	0.844594	1	5664	tags=25%, list=17%, signal=30%
GO_STRUCTURAL_CONSTITUENT_OF_RIBOSOME	GO_STRUCTURAL_CONSTITUENT_OF_RIBOSOME		205	0.292645	0.807886	0.629699	0.849849	1	9451	tags=37%, list=28%, signal=51%
GO_TRIGLYCERIDE_LIPASE_ACTIVITY	GO_TRIGLYCERIDE_LIPASE_ACTIVITY		20	0.272152	0.804777	0.722908	0.850842	1	2694	tags=10%, list=8%, signal=11%
GO_CARBOHYDRATE_KINASE_ACTIVITY	GO_CARBOHYDRATE_KINASE_ACTIVITY		19	0.290039	0.804219	0.722772	0.847768	1	9044	tags=47%, list=27%, signal=65%
GO_THYROID_HORMONE_RECEPTOR_BINDING	GO_THYROID_HORMONE_RECEPTOR_BINDING		30	0.250659	0.792648	0.732852	0.863188	1	5662	tags=23%, list=17%, signal=28%
GO_ANION_CHANNEL_ACTIVITY	GO_ANION_CHANNEL_ACTIVITY		88	0.20266	0.786859	0.803641	0.86845	1	4079	tags=15%, list=12%, signal=17%
GO_RECEPTOR_AGONIST_ACTIVITY	GO_RECEPTOR_AGONIST_ACTIVITY		15	0.293172	0.778532	0.739826	0.87747	1	6054	tags=27%, list=18%, signal=33%
GO_TRANSFERASE_ACTIVITY_TRANSFERRING_ALKYL_OR_ARYL_OTHER_THAN_METHYL_GROUPS	GO_TRANSFERASE_ACTIVITY_TRANSFERRING_ALKYL_OR_ARYL_OTHER_THAN_METHYL_GROUPS		60	0.229825	0.778193	0.789552	0.873915	1	11288	tags=43%, list=34%, signal=65%
GO_AMINO_ACID_BINDING	GO_AMINO_ACID_BINDING		105	0.201763	0.761131	0.844295	0.896521	1	3606	tags=14%, list=11%, signal=16%
GO_HYDROGEN_ION_TRANSMEMBRANE_TRANSPORTER_ACTIVITY	GO_HYDROGEN_ION_TRANSMEMBRANE_TRANSPORTER_ACTIVITY		97	0.230384	0.756933	0.709122	0.898756	1	8576	tags=33%, list=26%, signal=44%
GO_TBP_CLASS_PROTEIN_BINDING	GO_TBP_CLASS_PROTEIN_BINDING		20	0.271975	0.752331	0.770175	0.901565	1	10402	tags=50%, list=31%, signal=73%
GO_TRANSFERASE_ACTIVITY_TRANSFERRING_SULFUR_CONTAINING_GROUPS	GO_TRANSFERASE_ACTIVITY_TRANSFERRING_SULFUR_CONTAINING_GROUPS		63	0.208205	0.740982	0.850071	0.914231	1	10842	tags=41%, list=33%, signal=61%
GO_ACTIVE_ION_TRANSMEMBRANE_TRANSPORTER_ACTIVITY	GO_ACTIVE_ION_TRANSMEMBRANE_TRANSPORTER_ACTIVITY		165	0.17131	0.734546	0.89309	0.919305	1	8983	tags=27%, list=27%, signal=36%
GO_BICARBONATE_TRANSMEMBRANE_TRANSPORTER_ACTIVITY	GO_BICARBONATE_TRANSMEMBRANE_TRANSPORTER_ACTIVITY		19	0.234001	0.7196	0.801223	0.936156	1	8528	tags=26%, list=26%, signal=35%
GO_WIDE_PORE_CHANNEL_ACTIVITY	GO_WIDE_PORE_CHANNEL_ACTIVITY		22	0.246264	0.714202	0.8375	0.939249	1	9725	tags=41%, list=29%, signal=58%
GO_PRENYLTRANSFERASE_ACTIVITY	GO_PRENYLTRANSFERASE_ACTIVITY		15	0.274993	0.713364	0.824762	0.936214	1	10466	tags=47%, list=31%, signal=68%
GO_LIPASE_INHIBITOR_ACTIVITY	GO_LIPASE_INHIBITOR_ACTIVITY		17	0.268444	0.712309	0.783654	0.933319	1	3498	tags=18%, list=11%, signal=20%
GO_LYSINE_ACETYLATED_HISTONE_BINDING	GO_LYSINE_ACETYLATED_HISTONE_BINDING		16	0.293345	0.709351	0.8	0.932917	1	5063	tags=19%, list=15%, signal=22%
GO_PHOSPHATE_ION_TRANSMEMBRANE_TRANSPORTER_ACTIVITY	GO_PHOSPHATE_ION_TRANSMEMBRANE_TRANSPORTER_ACTIVITY		16	0.243406	0.709028	0.846039	0.929168	1	74	tags=6%, list=0%, signal=6%
GO_CATION_TRANSPORTING_ATPASE_ACTIVITY	GO_CATION_TRANSPORTING_ATPASE_ACTIVITY		58	0.203751	0.703515	0.849693	0.932256	1	8983	tags=31%, list=27%, signal=42%
GO_HYALURONIC_ACID_BINDING	GO_HYALURONIC_ACID_BINDING		20	0.253706	0.70198	0.805947	0.929974	1	9024	tags=35%, list=27%, signal=48%
GO_SUGAR_TRANSMEMBRANE_TRANSPORTER_ACTIVITY	GO_SUGAR_TRANSMEMBRANE_TRANSPORTER_ACTIVITY		32	0.217794	0.699602	0.872969	0.928883	1	2834	tags=13%, list=9%, signal=14%
GO_STEROID_DEHYDROGENASE_ACTIVITY	GO_STEROID_DEHYDROGENASE_ACTIVITY		27	0.230789	0.685993	0.877761	0.941501	1	11067	tags=44%, list=33%, signal=67%
GO_PHOSPHOTYROSINE_BINDING	GO_PHOSPHOTYROSINE_BINDING		15	0.259539	0.68413	0.859619	0.939477	1	8204	tags=40%, list=25%, signal=53%
GO_PROTEIN_TYROSINE_KINASE_ACTIVATOR_ACTIVITY	GO_PROTEIN_TYROSINE_KINASE_ACTIVATOR_ACTIVITY		15	0.241355	0.676229	0.878357	0.944251	1	13871	tags=47%, list=42%, signal=80%
GO_ASPARTIC_TYPE_PEPTIDASE_ACTIVITY	GO_ASPARTIC_TYPE_PEPTIDASE_ACTIVITY		22	0.20499	0.66675	0.893688	0.950655	1	4505	tags=18%, list=14%, signal=21%
GO_LOW_DENSITY_LIPOPROTEIN_PARTICLE_RECEPTOR_BINDING	GO_LOW_DENSITY_LIPOPROTEIN_PARTICLE_RECEPTOR_BINDING		17	0.256265	0.666119	0.861252	0.947203	1	7730	tags=29%, list=23%, signal=38%
GO_PEPTIDASE_ACTIVATOR_ACTIVITY_INVOLVED_IN_APOPTOTIC_PROCESS	GO_PEPTIDASE_ACTIVATOR_ACTIVITY_INVOLVED_IN_APOPTOTIC_PROCESS		19	0.2117	0.648294	0.932432	0.961214	1	8629	tags=26%, list=26%, signal=36%
GO_CXCR_CHEMOKINE_RECEPTOR_BINDING	GO_CXCR_CHEMOKINE_RECEPTOR_BINDING		15	0.291902	0.647647	0.847201	0.957701	1	8293	tags=33%, list=25%, signal=44%
GO_EXCITATORY_EXTRACELLULAR_LIGAND_GATED_ION_CHANNEL_ACTIVITY	GO_EXCITATORY_EXTRACELLULAR_LIGAND_GATED_ION_CHANNEL_ACTIVITY		53	0.185372	0.64238	0.918367	0.958299	1	3721	tags=11%, list=11%, signal=13%
GO_COMPLEMENT_BINDING	GO_COMPLEMENT_BINDING		19	0.236834	0.639926	0.889752	0.956409	1	1450	tags=11%, list=4%, signal=11%
GO_NADH_DEHYDROGENASE_ACTIVITY	GO_NADH_DEHYDROGENASE_ACTIVITY		37	0.266668	0.610195	0.793169	0.976824	1	11524	tags=51%, list=35%, signal=78%
GO_ALCOHOL_DEHYDROGENASE_NADP_ACTIVITY	GO_ALCOHOL_DEHYDROGENASE_NADP_ACTIVITY		16	0.240668	0.599878	0.910632	0.980064	1	14058	tags=38%, list=42%, signal=65%
GO_NEUROTRANSMITTER_RECEPTOR_ACTIVITY	GO_NEUROTRANSMITTER_RECEPTOR_ACTIVITY		63	0.166202	0.595147	0.957869	0.979225	1	7950	tags=22%, list=24%, signal=29%
GO_DEATH_RECEPTOR_ACTIVITY	GO_DEATH_RECEPTOR_ACTIVITY		23	0.233172	0.593628	0.892308	0.976033	1	2057	tags=9%, list=6%, signal=9%
GO_ARACHIDONIC_ACID_MONOOXYGENASE_ACTIVITY	GO_ARACHIDONIC_ACID_MONOOXYGENASE_ACTIVITY		15	0.233399	0.581038	0.915108	0.979487	1	6547	tags=20%, list=20%, signal=25%
GO_OXIDOREDUCTASE_ACTIVITY_ACTING_ON_NAD_P_H_OXYGEN_AS_ACCEPTOR	GO_OXIDOREDUCTASE_ACTIVITY_ACTING_ON_NAD_P_H_OXYGEN_AS_ACCEPTOR		15	0.228004	0.569417	0.91248	0.982159	1	12336	tags=40%, list=37%, signal=64%
GO_OXIDOREDUCTASE_ACTIVITY_ACTING_ON_A_HEME_GROUP_OF_DONORS	GO_OXIDOREDUCTASE_ACTIVITY_ACTING_ON_A_HEME_GROUP_OF_DONORS		24	0.217786	0.556615	0.892983	0.984164	1	9548	tags=38%, list=29%, signal=53%
GO_OXIDOREDUCTASE_ACTIVITY_ACTING_ON_NAD_P_H	GO_OXIDOREDUCTASE_ACTIVITY_ACTING_ON_NAD_P_H		91	0.181357	0.553848	0.908778	0.981365	1	11524	tags=36%, list=35%, signal=55%
GO_OXIDOREDUCTASE_ACTIVITY_ACTING_ON_NAD_P_H_QUINONE_OR_SIMILAR_COMPOUND_AS_ACCEPTOR	GO_OXIDOREDUCTASE_ACTIVITY_ACTING_ON_NAD_P_H_QUINONE_OR_SIMILAR_COMPOUND_AS_ACCEPTOR		51	0.215237	0.550582	0.856631	0.978834	1	11524	tags=39%, list=35%, signal=60%
GO_HEPARAN_SULFATE_SULFOTRANSFERASE_ACTIVITY	GO_HEPARAN_SULFATE_SULFOTRANSFERASE_ACTIVITY		15	0.200965	0.540443	0.958533	0.979093	1	10141	tags=33%, list=30%, signal=48%
GO_GLUTATHIONE_PEROXIDASE_ACTIVITY	GO_GLUTATHIONE_PEROXIDASE_ACTIVITY		17	0.194617	0.528105	0.965278	0.979656	1	12871	tags=47%, list=39%, signal=77%
GO_GABA_RECEPTOR_ACTIVITY	GO_GABA_RECEPTOR_ACTIVITY		21	0.163598	0.437802	0.995968	0.994765	1	14706	tags=57%, list=44%, signal=102%

## Sheet: C5-GO-CC
NAME	GS<br> follow link to MSigDB	GS DETAILS	SIZE	ES	NES	NOM p-val	FDR q-val	FWER p-val	RANK AT MAX	LEADING EDGE
GO_CONDENSED_CHROMOSOME	GO_CONDENSED_CHROMOSOME	Details ...	175	0.643516	2.05513	0	0.0384681	0.031	4482	tags=50%, list=13%, signal=58%
GO_SEX_CHROMOSOME	GO_SEX_CHROMOSOME	Details ...	27	0.677506	2.0247	0	0.0330974	0.044	3057	tags=56%, list=9%, signal=61%
GO_CONDENSED_CHROMOSOME_CENTROMERIC_REGION	GO_CONDENSED_CHROMOSOME_CENTROMERIC_REGION	Details ...	87	0.699081	1.98342	0.00782779	0.0444006	0.07	4482	tags=61%, list=13%, signal=70%
GO_SPINDLE_MIDZONE	GO_SPINDLE_MIDZONE	Details ...	25	0.716331	1.94789	0.00750469	0.0489646	0.093	2105	tags=52%, list=6%, signal=55%
GO_CONDENSED_NUCLEAR_CHROMOSOME	GO_CONDENSED_NUCLEAR_CHROMOSOME	Details ...	76	0.606117	1.94628	0.00176056	0.0397831	0.095	4282	tags=42%, list=13%, signal=48%
GO_CHROMOSOMAL_REGION	GO_CHROMOSOMAL_REGION	Details ...	302	0.551127	1.9037	0.0169492	0.0569745	0.161	4751	tags=45%, list=14%, signal=52%
GO_CHROMOSOME_CENTROMERIC_REGION	GO_CHROMOSOME_CENTROMERIC_REGION	Details ...	158	0.609311	1.89222	0.0231214	0.0566823	0.182	4482	tags=52%, list=13%, signal=60%
GO_CHROMOSOME_TELOMERIC_REGION	GO_CHROMOSOME_TELOMERIC_REGION	Details ...	150	0.523595	1.87319	0.00718133	0.0629141	0.213	6078	tags=47%, list=18%, signal=57%
GO_KINETOCHORE	GO_KINETOCHORE	Details ...	107	0.622513	1.86252	0.0155945	0.0625895	0.23	2098	tags=44%, list=6%, signal=47%
GO_REPLICATION_FORK	GO_REPLICATION_FORK	Details ...	62	0.651798	1.86144	0.0182186	0.0570793	0.232	1216	tags=44%, list=4%, signal=45%
GO_NUCLEAR_CHROMOSOME_TELOMERIC_REGION	GO_NUCLEAR_CHROMOSOME_TELOMERIC_REGION	Details ...	123	0.523246	1.83495	0.00891266	0.0686651	0.286	6078	tags=47%, list=18%, signal=57%
GO_PRONUCLEUS	GO_PRONUCLEUS	Details ...	15	0.751899	1.82085	0.00198807	0.0726476	0.32	5151	tags=60%, list=15%, signal=71%
GO_COPI_COATED_VESICLE	GO_COPI_COATED_VESICLE	Details ...	22	0.677396	1.79553	0.00582524	0.084919	0.382	5543	tags=59%, list=17%, signal=71%
GO_NUCLEAR_HETEROCHROMATIN	GO_NUCLEAR_HETEROCHROMATIN	Details ...	31	0.580111	1.77908	0.0145455	0.0914473	0.421	3057	tags=45%, list=9%, signal=50%
GO_ENDORIBONUCLEASE_COMPLEX	GO_ENDORIBONUCLEASE_COMPLEX	Details ...	17	0.693567	1.77222	0.0166667	0.0909695	0.439	5384	tags=76%, list=16%, signal=91%
GO_NUCLEAR_CHROMOSOME	GO_NUCLEAR_CHROMOSOME	Details ...	494	0.440695	1.7663	0.0155172	0.0891548	0.448	5965	tags=40%, list=18%, signal=48%
GO_XY_BODY	GO_XY_BODY	Details ...	15	0.638231	1.76436	0.00571429	0.0850241	0.451	4621	tags=53%, list=14%, signal=62%
GO_SMN_SM_PROTEIN_COMPLEX	GO_SMN_SM_PROTEIN_COMPLEX	Details ...	17	0.731374	1.75448	0.0209524	0.0875103	0.467	2184	tags=53%, list=7%, signal=57%
GO_MITOTIC_SPINDLE	GO_MITOTIC_SPINDLE	Details ...	50	0.538285	1.75057	0.0190641	0.0857915	0.474	3471	tags=38%, list=10%, signal=42%
GO_COPI_COATED_VESICLE_MEMBRANE	GO_COPI_COATED_VESICLE_MEMBRANE	Details ...	16	0.710308	1.74257	0.0115607	0.0875401	0.502	5543	tags=69%, list=17%, signal=82%
GO_U12_TYPE_SPLICEOSOMAL_COMPLEX	GO_U12_TYPE_SPLICEOSOMAL_COMPLEX		25	0.636709	1.72991	0.0246212	0.0932682	0.538	8170	tags=60%, list=25%, signal=79%
GO_SPINDLE	GO_SPINDLE		265	0.468922	1.70379	0.025878	0.111108	0.601	2921	tags=31%, list=9%, signal=34%
GO_U1_SNRNP	GO_U1_SNRNP		17	0.699967	1.68805	0.0252918	0.120759	0.64	7337	tags=82%, list=22%, signal=106%
GO_HETEROCHROMATIN	GO_HETEROCHROMATIN		65	0.51694	1.68712	0.0166359	0.116606	0.641	4080	tags=46%, list=12%, signal=53%
GO_METHYLTRANSFERASE_COMPLEX	GO_METHYLTRANSFERASE_COMPLEX		82	0.50015	1.68168	0.023766	0.116928	0.65	6342	tags=51%, list=19%, signal=63%
GO_ROUGH_ENDOPLASMIC_RETICULUM_MEMBRANE	GO_ROUGH_ENDOPLASMIC_RETICULUM_MEMBRANE		18	0.600824	1.67773	0.0131086	0.116601	0.664	6111	tags=56%, list=18%, signal=68%
GO_MIDBODY	GO_MIDBODY		121	0.464762	1.6673	0.0218978	0.121753	0.689	2903	tags=33%, list=9%, signal=36%
GO_ANAPHASE_PROMOTING_COMPLEX	GO_ANAPHASE_PROMOTING_COMPLEX		20	0.60461	1.66403	0.0250896	0.120378	0.695	2609	tags=40%, list=8%, signal=43%
GO_SPINDLE_MICROTUBULE	GO_SPINDLE_MICROTUBULE		56	0.546393	1.65925	0.0392523	0.12105	0.708	1191	tags=30%, list=4%, signal=31%
GO_U2_TYPE_SPLICEOSOMAL_COMPLEX	GO_U2_TYPE_SPLICEOSOMAL_COMPLEX		29	0.563917	1.65484	0.0553435	0.120898	0.717	8170	tags=59%, list=25%, signal=78%
GO_NUCLEAR_UBIQUITIN_LIGASE_COMPLEX	GO_NUCLEAR_UBIQUITIN_LIGASE_COMPLEX		40	0.504219	1.65395	0.0191304	0.117778	0.718	3057	tags=35%, list=9%, signal=38%
GO_ORGANELLAR_LARGE_RIBOSOMAL_SUBUNIT	GO_ORGANELLAR_LARGE_RIBOSOMAL_SUBUNIT		30	0.662976	1.64904	0.049904	0.118807	0.727	5379	tags=60%, list=16%, signal=72%
GO_GOLGI_ASSOCIATED_VESICLE_MEMBRANE	GO_GOLGI_ASSOCIATED_VESICLE_MEMBRANE		46	0.472529	1.63845	0.0138648	0.124117	0.75	5913	tags=43%, list=18%, signal=53%
GO_NUCLEAR_REPLICATION_FORK	GO_NUCLEAR_REPLICATION_FORK		39	0.583641	1.63659	0.0452756	0.122088	0.752	3790	tags=44%, list=11%, signal=49%
GO_POLE_PLASM	GO_POLE_PLASM		15	0.61497	1.62801	0.0255183	0.126225	0.77	3889	tags=40%, list=12%, signal=45%
GO_ORGANELLAR_RIBOSOME	GO_ORGANELLAR_RIBOSOME		67	0.619866	1.62397	0.0568182	0.126322	0.777	9586	tags=75%, list=29%, signal=105%
GO_SMALL_NUCLEAR_RIBONUCLEOPROTEIN_COMPLEX	GO_SMALL_NUCLEAR_RIBONUCLEOPROTEIN_COMPLEX		59	0.542391	1.60309	0.0537428	0.143375	0.814	7337	tags=56%, list=22%, signal=72%
GO_KINESIN_COMPLEX	GO_KINESIN_COMPLEX		53	0.508612	1.60241	0.0590278	0.14028	0.815	2190	tags=34%, list=7%, signal=36%
GO_PRESPLICEOSOME	GO_PRESPLICEOSOME		21	0.60416	1.6018	0.0475285	0.137338	0.815	7337	tags=67%, list=22%, signal=85%
GO_SPINDLE_POLE	GO_SPINDLE_POLE		112	0.482011	1.59514	0.0601504	0.140764	0.823	3113	tags=33%, list=9%, signal=36%
GO_CAJAL_BODY	GO_CAJAL_BODY		49	0.506752	1.59149	0.0317164	0.141055	0.828	2171	tags=31%, list=7%, signal=33%
GO_90S_PRERIBOSOME	GO_90S_PRERIBOSOME		23	0.644565	1.56508	0.0529301	0.165106	0.862	5599	tags=61%, list=17%, signal=73%
GO_U2_SNRNP	GO_U2_SNRNP		18	0.644928	1.56336	0.0728347	0.163245	0.865	1245	tags=44%, list=4%, signal=46%
GO_CENTRIOLE	GO_CENTRIOLE		94	0.451644	1.56053	0.0475382	0.162955	0.866	2903	tags=29%, list=9%, signal=31%
GO_U2_TYPE_PRESPLICEOSOME	GO_U2_TYPE_PRESPLICEOSOME		16	0.615756	1.55787	0.0644531	0.161888	0.868	7337	tags=69%, list=22%, signal=88%
GO_SPLICEOSOMAL_COMPLEX	GO_SPLICEOSOMAL_COMPLEX		162	0.467407	1.55493	0.0596421	0.161419	0.873	7575	tags=46%, list=23%, signal=60%
GO_NUCLEAR_EXOSOME_RNASE_COMPLEX_	GO_NUCLEAR_EXOSOME_RNASE_COMPLEX_		15	0.61677	1.55233	0.0521042	0.160556	0.875	7625	tags=67%, list=23%, signal=86%
GO_SPLICEOSOMAL_TRI_SNRNP_COMPLEX	GO_SPLICEOSOMAL_TRI_SNRNP_COMPLEX		26	0.635044	1.54617	0.100952	0.16356	0.886	5925	tags=62%, list=18%, signal=75%
GO_GERM_CELL_NUCLEUS	GO_GERM_CELL_NUCLEUS		15	0.562282	1.54338	0.0553633	0.163001	0.888	2903	tags=33%, list=9%, signal=37%
GO_MICROTUBULE_ORGANIZING_CENTER_PART	GO_MICROTUBULE_ORGANIZING_CENTER_PART		136	0.417038	1.53858	0.0497427	0.165177	0.898	2932	tags=26%, list=9%, signal=29%
GO_NUCLEAR_PORE	GO_NUCLEAR_PORE		74	0.488537	1.53046	0.0849057	0.17074	0.904	3771	tags=34%, list=11%, signal=38%
GO_CLATHRIN_ADAPTOR_COMPLEX	GO_CLATHRIN_ADAPTOR_COMPLEX		27	0.469636	1.52237	0.0276753	0.176004	0.913	6126	tags=41%, list=18%, signal=50%
GO_U5_SNRNP	GO_U5_SNRNP		16	0.644345	1.52188	0.0847458	0.173291	0.913	5833	tags=63%, list=18%, signal=76%
GO_PROTEASOME_CORE_COMPLEX	GO_PROTEASOME_CORE_COMPLEX		19	0.698215	1.51875	0.101695	0.173226	0.918	9007	tags=89%, list=27%, signal=123%
GO_INTRINSIC_COMPONENT_OF_MITOCHONDRIAL_INNER_MEMBRANE	GO_INTRINSIC_COMPONENT_OF_MITOCHONDRIAL_INNER_MEMBRANE		17	0.583269	1.51198	0.073724	0.177466	0.924	5478	tags=59%, list=16%, signal=70%
GO_INTRINSIC_COMPONENT_OF_ENDOPLASMIC_RETICULUM_MEMBRANE	GO_INTRINSIC_COMPONENT_OF_ENDOPLASMIC_RETICULUM_MEMBRANE		117	0.42859	1.50644	0.0550622	0.180504	0.929	7110	tags=44%, list=21%, signal=56%
GO_HISTONE_METHYLTRANSFERASE_COMPLEX	GO_HISTONE_METHYLTRANSFERASE_COMPLEX		63	0.448193	1.49842	0.0692168	0.186418	0.932	6342	tags=46%, list=19%, signal=57%
GO_PROTEASOME_ACCESSORY_COMPLEX	GO_PROTEASOME_ACCESSORY_COMPLEX		24	0.62605	1.49718	0.0966469	0.184302	0.933	10129	tags=79%, list=30%, signal=114%
GO_CATALYTIC_STEP_2_SPLICEOSOME	GO_CATALYTIC_STEP_2_SPLICEOSOME		84	0.492859	1.49255	0.114173	0.186713	0.937	6083	tags=43%, list=18%, signal=52%
GO_REPLISOME	GO_REPLISOME		29	0.560946	1.48689	0.108911	0.190037	0.94	1036	tags=34%, list=3%, signal=36%
GO_PRERIBOSOME_LARGE_SUBUNIT_PRECURSOR	GO_PRERIBOSOME_LARGE_SUBUNIT_PRECURSOR		21	0.637809	1.48486	0.0994372	0.189316	0.944	5133	tags=52%, list=15%, signal=62%
GO_EXOSOME_RNASE_COMPLEX_	GO_EXOSOME_RNASE_COMPLEX_		21	0.528827	1.48285	0.108738	0.188844	0.944	7625	tags=62%, list=23%, signal=80%
GO_INO80_TYPE_COMPLEX	GO_INO80_TYPE_COMPLEX		21	0.516847	1.48095	0.0603291	0.187942	0.945	5344	tags=48%, list=16%, signal=57%
GO_SYNAPTONEMAL_COMPLEX	GO_SYNAPTONEMAL_COMPLEX		32	0.469744	1.47948	0.0599078	0.186539	0.946	7742	tags=44%, list=23%, signal=57%
GO_CHROMATIN	GO_CHROMATIN		412	0.368362	1.47857	0.0467128	0.184733	0.947	5810	tags=35%, list=17%, signal=42%
GO_NUCLEOID	GO_NUCLEOID		40	0.540139	1.47703	0.116959	0.183611	0.947	5004	tags=45%, list=15%, signal=53%
GO_SMALL_NUCLEOLAR_RIBONUCLEOPROTEIN_COMPLEX	GO_SMALL_NUCLEOLAR_RIBONUCLEOPROTEIN_COMPLEX		18	0.636658	1.47218	0.111732	0.186365	0.953	5349	tags=67%, list=16%, signal=79%
GO_PROTEASOME_COMPLEX	GO_PROTEASOME_COMPLEX		74	0.509228	1.4675	0.137931	0.188335	0.956	9007	tags=61%, list=27%, signal=83%
GO_EUCHROMATIN	GO_EUCHROMATIN		30	0.478819	1.46675	0.0573356	0.18636	0.956	4691	tags=43%, list=14%, signal=50%
GO_NUCLEAR_CHROMATIN	GO_NUCLEAR_CHROMATIN		279	0.351043	1.46138	0.0619765	0.189841	0.961	5810	tags=35%, list=17%, signal=42%
GO_TELOMERASE_HOLOENZYME_COMPLEX	GO_TELOMERASE_HOLOENZYME_COMPLEX		19	0.56252	1.45898	0.105455	0.190015	0.961	5004	tags=58%, list=15%, signal=68%
GO_U4_U6_X_U5_TRI_SNRNP_COMPLEX	GO_U4_U6_X_U5_TRI_SNRNP_COMPLEX		21	0.594959	1.45543	0.138577	0.19115	0.962	9252	tags=71%, list=28%, signal=99%
GO_ENDOPLASMIC_RETICULUM_GOLGI_INTERMEDIATE_COMPARTMENT_MEMBRANE	GO_ENDOPLASMIC_RETICULUM_GOLGI_INTERMEDIATE_COMPARTMENT_MEMBRANE		58	0.428904	1.44956	0.0992647	0.195073	0.964	6644	tags=41%, list=20%, signal=52%
GO_MLL1_2_COMPLEX	GO_MLL1_2_COMPLEX		26	0.507461	1.44632	0.0716981	0.196212	0.965	6342	tags=42%, list=19%, signal=52%
GO_PRERIBOSOME	GO_PRERIBOSOME		59	0.532666	1.42877	0.130769	0.213034	0.973	5599	tags=49%, list=17%, signal=59%
GO_DNA_PACKAGING_COMPLEX	GO_DNA_PACKAGING_COMPLEX		90	0.524501	1.41671	0.0974212	0.224829	0.98	5797	tags=46%, list=17%, signal=55%
GO_PRECATALYTIC_SPLICEOSOME	GO_PRECATALYTIC_SPLICEOSOME		21	0.582976	1.4166	0.149225	0.222024	0.98	8170	tags=67%, list=25%, signal=88%
GO_NUCLEAR_MATRIX	GO_NUCLEAR_MATRIX		95	0.39697	1.41353	0.076225	0.223028	0.98	6366	tags=40%, list=19%, signal=49%
GO_SMALL_SUBUNIT_PROCESSOME	GO_SMALL_SUBUNIT_PROCESSOME		32	0.540836	1.40887	0.129524	0.225673	0.982	10067	tags=72%, list=30%, signal=103%
GO_NUCLEAR_PERIPHERY	GO_NUCLEAR_PERIPHERY		118	0.395431	1.40439	0.10302	0.228382	0.984	6105	tags=39%, list=18%, signal=48%
GO_NUCLEOLAR_PART	GO_NUCLEOLAR_PART		59	0.500307	1.39692	0.156069	0.234608	0.986	5963	tags=56%, list=18%, signal=68%
GO_SWI_SNF_COMPLEX	GO_SWI_SNF_COMPLEX		15	0.539411	1.39434	0.133733	0.234617	0.986	1643	tags=33%, list=5%, signal=35%
GO_SITE_OF_DOUBLE_STRAND_BREAK	GO_SITE_OF_DOUBLE_STRAND_BREAK		29	0.467692	1.39386	0.121154	0.232432	0.986	7740	tags=48%, list=23%, signal=63%
GO_CYTOPLASMIC_EXOSOME_RNASE_COMPLEX_	GO_CYTOPLASMIC_EXOSOME_RNASE_COMPLEX_		15	0.541974	1.39053	0.142315	0.233575	0.986	7625	tags=67%, list=23%, signal=86%
GO_PROTEIN_DNA_COMPLEX	GO_PROTEIN_DNA_COMPLEX		155	0.405824	1.37881	0.133436	0.244481	0.988	5939	tags=36%, list=18%, signal=44%
GO_DNA_REPAIR_COMPLEX	GO_DNA_REPAIR_COMPLEX		41	0.424083	1.37306	0.108614	0.248326	0.989	5397	tags=37%, list=16%, signal=44%
GO_GOLGI_ASSOCIATED_VESICLE	GO_GOLGI_ASSOCIATED_VESICLE		76	0.367031	1.3642	0.0917108	0.256067	0.99	6111	tags=37%, list=18%, signal=45%
GO_ORGANELLAR_SMALL_RIBOSOMAL_SUBUNIT	GO_ORGANELLAR_SMALL_RIBOSOMAL_SUBUNIT		25	0.575028	1.35871	0.186312	0.259683	0.993	12164	tags=84%, list=37%, signal=132%
GO_NUCLEAR_INNER_MEMBRANE	GO_NUCLEAR_INNER_MEMBRANE		46	0.392204	1.35654	0.105023	0.259164	0.994	3674	tags=26%, list=11%, signal=29%
GO_MICROTUBULE_ASSOCIATED_COMPLEX	GO_MICROTUBULE_ASSOCIATED_COMPLEX		141	0.36387	1.35113	0.134831	0.263027	0.997	3639	tags=26%, list=11%, signal=29%
GO_NUCLEAR_NUCLEOSOME	GO_NUCLEAR_NUCLEOSOME		37	0.54774	1.34368	0.132244	0.269305	0.997	5791	tags=51%, list=17%, signal=62%
GO_CLATHRIN_COAT	GO_CLATHRIN_COAT		46	0.376718	1.32159	0.110721	0.294837	0.997	8305	tags=43%, list=25%, signal=58%
GO_ENDOPLASMIC_RETICULUM_GOLGI_INTERMEDIATE_COMPARTMENT	GO_ENDOPLASMIC_RETICULUM_GOLGI_INTERMEDIATE_COMPARTMENT		97	0.369862	1.31953	0.153707	0.294419	0.997	6644	tags=37%, list=20%, signal=46%
GO_INTERCELLULAR_BRIDGE	GO_INTERCELLULAR_BRIDGE		40	0.383104	1.31541	0.116576	0.296639	0.998	5503	tags=35%, list=17%, signal=42%
GO_MRNA_CLEAVAGE_FACTOR_COMPLEX	GO_MRNA_CLEAVAGE_FACTOR_COMPLEX		17	0.488572	1.30856	0.190991	0.302601	0.999	5261	tags=41%, list=16%, signal=49%
GO_ORGANELLE_ENVELOPE_LUMEN	GO_ORGANELLE_ENVELOPE_LUMEN		74	0.399068	1.30339	0.190647	0.306292	0.999	6967	tags=39%, list=21%, signal=49%
GO_RNA_POLYMERASE_COMPLEX	GO_RNA_POLYMERASE_COMPLEX		119	0.364666	1.30091	0.169643	0.306386	0.999	9013	tags=43%, list=27%, signal=59%
GO_GAMMA_TUBULIN_COMPLEX	GO_GAMMA_TUBULIN_COMPLEX		19	0.454951	1.29328	0.173042	0.313462	0.999	7290	tags=47%, list=22%, signal=61%
GO_SAGA_TYPE_COMPLEX	GO_SAGA_TYPE_COMPLEX		30	0.412933	1.29228	0.180077	0.311584	0.999	6258	tags=43%, list=19%, signal=53%
GO_AP_TYPE_MEMBRANE_COAT_ADAPTOR_COMPLEX	GO_AP_TYPE_MEMBRANE_COAT_ADAPTOR_COMPLEX		36	0.380282	1.29213	0.138989	0.308672	0.999	6358	tags=36%, list=19%, signal=45%
GO_PCG_PROTEIN_COMPLEX	GO_PCG_PROTEIN_COMPLEX		43	0.401166	1.29042	0.176678	0.307915	0.999	4043	tags=40%, list=12%, signal=45%
GO_CENTROSOME	GO_CENTROSOME		460	0.322816	1.29031	0.142612	0.305011	0.999	5333	tags=29%, list=16%, signal=34%
GO_DNA_DIRECTED_RNA_POLYMERASE_II_HOLOENZYME	GO_DNA_DIRECTED_RNA_POLYMERASE_II_HOLOENZYME		94	0.362918	1.28551	0.170642	0.308344	0.999	6189	tags=32%, list=19%, signal=39%
GO_CIS_GOLGI_NETWORK	GO_CIS_GOLGI_NETWORK		38	0.38296	1.2629	0.180505	0.335084	0.999	5801	tags=32%, list=17%, signal=38%
GO_BAF_TYPE_COMPLEX	GO_BAF_TYPE_COMPLEX		23	0.437013	1.26288	0.225688	0.331898	0.999	1643	tags=26%, list=5%, signal=27%
GO_CYTOPLASMIC_MRNA_PROCESSING_BODY	GO_CYTOPLASMIC_MRNA_PROCESSING_BODY		62	0.350007	1.26035	0.168739	0.332271	0.999	7360	tags=39%, list=22%, signal=50%
GO_GOLGI_CISTERNA	GO_GOLGI_CISTERNA		91	0.317888	1.25903	0.152209	0.330901	0.999	5932	tags=30%, list=18%, signal=36%
GO_INTRINSIC_COMPONENT_OF_ORGANELLE_MEMBRANE	GO_INTRINSIC_COMPONENT_OF_ORGANELLE_MEMBRANE		245	0.317909	1.25431	0.164686	0.334302	0.999	4716	tags=27%, list=14%, signal=32%
GO_GOLGI_CISTERNA_MEMBRANE	GO_GOLGI_CISTERNA_MEMBRANE		73	0.331666	1.24164	0.183811	0.348504	1	4923	tags=27%, list=15%, signal=32%
GO_CUL4_RING_E3_UBIQUITIN_LIGASE_COMPLEX	GO_CUL4_RING_E3_UBIQUITIN_LIGASE_COMPLEX		25	0.420234	1.23598	0.196226	0.353551	1	5738	tags=36%, list=17%, signal=43%
GO_DNA_DIRECTED_RNA_POLYMERASE_II_CORE_COMPLEX	GO_DNA_DIRECTED_RNA_POLYMERASE_II_CORE_COMPLEX		15	0.473313	1.22281	0.251748	0.368814	1	3829	tags=33%, list=12%, signal=38%
GO_NUCLEAR_TRANSCRIPTION_FACTOR_COMPLEX	GO_NUCLEAR_TRANSCRIPTION_FACTOR_COMPLEX		126	0.306329	1.21634	0.209343	0.374683	1	6189	tags=29%, list=19%, signal=36%
GO_VESICLE_COAT	GO_VESICLE_COAT		44	0.378217	1.21184	0.224719	0.378033	1	6538	tags=39%, list=20%, signal=48%
GO_ENDOCYTIC_VESICLE_LUMEN	GO_ENDOCYTIC_VESICLE_LUMEN		17	0.452083	1.19643	0.286149	0.398115	1	1086	tags=18%, list=3%, signal=18%
GO_EXON_EXON_JUNCTION_COMPLEX	GO_EXON_EXON_JUNCTION_COMPLEX		20	0.421114	1.18519	0.248532	0.411874	1	6083	tags=45%, list=18%, signal=55%
GO_CARBOXY_TERMINAL_DOMAIN_PROTEIN_KINASE_COMPLEX	GO_CARBOXY_TERMINAL_DOMAIN_PROTEIN_KINASE_COMPLEX		22	0.426429	1.16206	0.28626	0.444589	1	6189	tags=41%, list=19%, signal=50%
GO_PROTON_TRANSPORTING_TWO_SECTOR_ATPASE_COMPLEX_CATALYTIC_DOMAIN	GO_PROTON_TRANSPORTING_TWO_SECTOR_ATPASE_COMPLEX_CATALYTIC_DOMAIN		17	0.446996	1.14842	0.310409	0.462272	1	8576	tags=53%, list=26%, signal=71%
GO_SWI_SNF_SUPERFAMILY_TYPE_COMPLEX	GO_SWI_SNF_SUPERFAMILY_TYPE_COMPLEX		71	0.340548	1.14349	0.307407	0.466616	1	5501	tags=34%, list=17%, signal=40%
GO_PROTON_TRANSPORTING_V_TYPE_ATPASE_COMPLEX	GO_PROTON_TRANSPORTING_V_TYPE_ATPASE_COMPLEX		22	0.406441	1.14058	0.322581	0.46736	1	4833	tags=27%, list=15%, signal=32%
GO_CYTOPLASMIC_MICROTUBULE	GO_CYTOPLASMIC_MICROTUBULE		51	0.325121	1.13009	0.305654	0.480325	1	3345	tags=22%, list=10%, signal=24%
GO_ACETYLCHOLINE_GATED_CHANNEL_COMPLEX	GO_ACETYLCHOLINE_GATED_CHANNEL_COMPLEX		22	0.343407	1.11248	0.340267	0.505109	1	6892	tags=23%, list=21%, signal=29%
GO_MICROTUBULE	GO_MICROTUBULE		381	0.279046	1.10983	0.319115	0.505656	1	3639	tags=21%, list=11%, signal=23%
GO_COATED_MEMBRANE	GO_COATED_MEMBRANE		82	0.295551	1.09318	0.326642	0.528689	1	6538	tags=30%, list=20%, signal=38%
GO_ACROSOMAL_VESICLE	GO_ACROSOMAL_VESICLE		77	0.271698	1.08651	0.335616	0.535934	1	8352	tags=34%, list=25%, signal=45%
GO_NUCLEAR_EUCHROMATIN	GO_NUCLEAR_EUCHROMATIN		23	0.3659	1.08479	0.361065	0.534477	1	2240	tags=26%, list=7%, signal=28%
GO_CELL_DIVISION_SITE	GO_CELL_DIVISION_SITE		47	0.325357	1.0846	0.34687	0.530531	1	5033	tags=23%, list=15%, signal=28%
GO_CILIARY_TRANSITION_ZONE	GO_CILIARY_TRANSITION_ZONE		23	0.397098	1.07867	0.368607	0.536408	1	3853	tags=30%, list=12%, signal=34%
GO_NUCLEAR_BODY	GO_NUCLEAR_BODY		336	0.274334	1.07621	0.349005	0.536175	1	5004	tags=24%, list=15%, signal=28%
GO_PIGMENT_GRANULE	GO_PIGMENT_GRANULE		100	0.326525	1.07526	0.385417	0.533568	1	3037	tags=21%, list=9%, signal=23%
GO_ORGANELLE_INNER_MEMBRANE	GO_ORGANELLE_INNER_MEMBRANE		485	0.315285	1.0752	0.389199	0.529568	1	9696	tags=45%, list=29%, signal=62%
GO_ACETYLTRANSFERASE_COMPLEX	GO_ACETYLTRANSFERASE_COMPLEX		85	0.307494	1.07379	0.375712	0.527945	1	6499	tags=35%, list=20%, signal=44%
GO_MITOCHONDRIAL_MATRIX	GO_MITOCHONDRIAL_MATRIX		387	0.309799	1.06909	0.399625	0.531206	1	7869	tags=38%, list=24%, signal=49%
GO_NUCLEAR_MEMBRANE	GO_NUCLEAR_MEMBRANE		256	0.264563	1.06637	0.369355	0.53187	1	3725	tags=23%, list=11%, signal=26%
GO_NUCLEAR_ENVELOPE	GO_NUCLEAR_ENVELOPE		384	0.263608	1.06603	0.355593	0.528401	1	3771	tags=22%, list=11%, signal=25%
GO_TRANSCRIPTIONALLY_ACTIVE_CHROMATIN	GO_TRANSCRIPTIONALLY_ACTIVE_CHROMATIN		17	0.356653	1.05481	0.394511	0.542394	1	2836	tags=29%, list=9%, signal=32%
GO_RIBONUCLEOPROTEIN_GRANULE	GO_RIBONUCLEOPROTEIN_GRANULE		139	0.27251	1.05429	0.389474	0.539177	1	6843	tags=30%, list=21%, signal=38%
GO_RNA_POLYMERASE_II_TRANSCRIPTION_FACTOR_COMPLEX	GO_RNA_POLYMERASE_II_TRANSCRIPTION_FACTOR_COMPLEX		100	0.274165	1.05375	0.370766	0.536025	1	6189	tags=26%, list=19%, signal=32%
GO_ESC_E_Z_COMPLEX	GO_ESC_E_Z_COMPLEX		16	0.403693	1.04883	0.398551	0.540009	1	3893	tags=44%, list=12%, signal=50%
GO_MEDIATOR_COMPLEX	GO_MEDIATOR_COMPLEX		34	0.336241	1.04511	0.435018	0.541721	1	6037	tags=32%, list=18%, signal=39%
GO_GOLGI_STACK	GO_GOLGI_STACK		121	0.2592	1.04466	0.388235	0.538492	1	5932	tags=26%, list=18%, signal=31%
GO_PML_BODY	GO_PML_BODY		94	0.285465	1.04313	0.388601	0.537048	1	3386	tags=21%, list=10%, signal=24%
GO_LUMENAL_SIDE_OF_MEMBRANE	GO_LUMENAL_SIDE_OF_MEMBRANE		30	0.422299	1.03904	0.438095	0.539632	1	9772	tags=43%, list=29%, signal=61%
GO_TRANSFERASE_COMPLEX_TRANSFERRING_PHOSPHORUS_CONTAINING_GROUPS	GO_TRANSFERASE_COMPLEX_TRANSFERRING_PHOSPHORUS_CONTAINING_GROUPS		231	0.259124	1.01695	0.419298	0.570992	1	6189	tags=27%, list=19%, signal=33%
GO_CYCLIN_DEPENDENT_PROTEIN_KINASE_HOLOENZYME_COMPLEX	GO_CYCLIN_DEPENDENT_PROTEIN_KINASE_HOLOENZYME_COMPLEX		30	0.335074	1.0129	0.437168	0.573294	1	5876	tags=33%, list=18%, signal=40%
GO_VERY_LOW_DENSITY_LIPOPROTEIN_PARTICLE	GO_VERY_LOW_DENSITY_LIPOPROTEIN_PARTICLE		18	0.361716	1.00213	0.475728	0.587089	1	5071	tags=28%, list=15%, signal=33%
GO_TRIGLYCERIDE_RICH_LIPOPROTEIN_PARTICLE	GO_TRIGLYCERIDE_RICH_LIPOPROTEIN_PARTICLE		18	0.361716	1.00213	0.475728	0.583068	1	5071	tags=28%, list=15%, signal=33%
GO_PROTON_TRANSPORTING_TWO_SECTOR_ATPASE_COMPLEX	GO_PROTON_TRANSPORTING_TWO_SECTOR_ATPASE_COMPLEX		46	0.350704	0.993084	0.488506	0.593534	1	8576	tags=41%, list=26%, signal=56%
GO_CENTRIOLAR_SATELLITE	GO_CENTRIOLAR_SATELLITE		24	0.321656	0.971907	0.487589	0.624266	1	2932	tags=17%, list=9%, signal=18%
GO_SNARE_COMPLEX	GO_SNARE_COMPLEX		52	0.261994	0.963481	0.510381	0.633665	1	2465	tags=17%, list=7%, signal=19%
GO_INTRINSIC_COMPONENT_OF_MITOCHONDRIAL_MEMBRANE	GO_INTRINSIC_COMPONENT_OF_MITOCHONDRIAL_MEMBRANE		44	0.309833	0.961877	0.485401	0.63199	1	4716	tags=32%, list=14%, signal=37%
GO_BLOC_COMPLEX	GO_BLOC_COMPLEX		16	0.350145	0.960928	0.514019	0.629548	1	7678	tags=38%, list=23%, signal=49%
GO_CLATHRIN_VESICLE_COAT	GO_CLATHRIN_VESICLE_COAT		23	0.320659	0.951143	0.517431	0.641273	1	6126	tags=35%, list=18%, signal=43%
GO_MICROTUBULE_PLUS_END	GO_MICROTUBULE_PLUS_END		16	0.380098	0.943082	0.553114	0.649976	1	80	tags=19%, list=0%, signal=19%
GO_MICROTUBULE_END	GO_MICROTUBULE_END		21	0.360285	0.943071	0.536412	0.645778	1	571	tags=19%, list=2%, signal=19%
GO_COATED_VESICLE	GO_COATED_VESICLE		229	0.234876	0.931329	0.539384	0.660482	1	6538	tags=27%, list=20%, signal=33%
GO_COATED_VESICLE_MEMBRANE	GO_COATED_VESICLE_MEMBRANE		134	0.256275	0.922679	0.574205	0.670343	1	6538	tags=26%, list=20%, signal=32%
GO_DNA_DIRECTED_RNA_POLYMERASE_III_COMPLEX	GO_DNA_DIRECTED_RNA_POLYMERASE_III_COMPLEX		18	0.358731	0.922114	0.564195	0.666941	1	13193	tags=78%, list=40%, signal=129%
GO_SMOOTH_ENDOPLASMIC_RETICULUM	GO_SMOOTH_ENDOPLASMIC_RETICULUM		33	0.288835	0.914389	0.57037	0.6752	1	1658	tags=18%, list=5%, signal=19%
GO_TRANSCRIPTION_FACTOR_TFIID_COMPLEX	GO_TRANSCRIPTION_FACTOR_TFIID_COMPLEX		23	0.30116	0.901498	0.593128	0.692216	1	10948	tags=48%, list=33%, signal=71%
GO_INTRACILIARY_TRANSPORT_PARTICLE_B	GO_INTRACILIARY_TRANSPORT_PARTICLE_B		18	0.334703	0.8979	0.578571	0.693944	1	5177	tags=33%, list=16%, signal=39%
GO_AXON_CYTOPLASM	GO_AXON_CYTOPLASM		29	0.283396	0.872254	0.63255	0.730849	1	4811	tags=21%, list=14%, signal=24%
GO_SPERM_PART	GO_SPERM_PART		119	0.209225	0.870453	0.701262	0.729452	1	7975	tags=29%, list=24%, signal=37%
GO_ROUGH_ENDOPLASMIC_RETICULUM	GO_ROUGH_ENDOPLASMIC_RETICULUM		65	0.244972	0.865659	0.6783	0.732953	1	5525	tags=23%, list=17%, signal=28%
GO_TRANS_GOLGI_NETWORK_TRANSPORT_VESICLE	GO_TRANS_GOLGI_NETWORK_TRANSPORT_VESICLE		27	0.277355	0.862458	0.660279	0.7339	1	5913	tags=30%, list=18%, signal=36%
GO_RIBOSOME	GO_RIBOSOME		217	0.310381	0.860979	0.572816	0.73173	1	9226	tags=37%, list=28%, signal=51%
GO_ACROSOMAL_MEMBRANE	GO_ACROSOMAL_MEMBRANE		18	0.292265	0.840635	0.709726	0.759378	1	7871	tags=39%, list=24%, signal=51%
GO_CILIARY_BASAL_BODY	GO_CILIARY_BASAL_BODY		74	0.236587	0.838833	0.675722	0.757876	1	3962	tags=20%, list=12%, signal=23%
GO_LYTIC_VACUOLE_MEMBRANE	GO_LYTIC_VACUOLE_MEMBRANE		255	0.214356	0.825957	0.683837	0.77395	1	4046	tags=16%, list=12%, signal=19%
GO_LARGE_RIBOSOMAL_SUBUNIT	GO_LARGE_RIBOSOMAL_SUBUNIT		92	0.32031	0.818642	0.621622	0.780536	1	5379	tags=24%, list=16%, signal=28%
GO_NUCLEAR_CYCLIN_DEPENDENT_PROTEIN_KINASE_HOLOENZYME_COMPLEX	GO_NUCLEAR_CYCLIN_DEPENDENT_PROTEIN_KINASE_HOLOENZYME_COMPLEX		15	0.31518	0.812964	0.664825	0.784641	1	5876	tags=33%, list=18%, signal=40%
GO_MITOCHONDRIAL_PROTEIN_COMPLEX	GO_MITOCHONDRIAL_PROTEIN_COMPLEX		128	0.290576	0.808408	0.650198	0.787013	1	9219	tags=40%, list=28%, signal=55%
GO_CLATHRIN_COAT_OF_COATED_PIT	GO_CLATHRIN_COAT_OF_COATED_PIT		16	0.295724	0.773565	0.719331	0.836952	1	6126	tags=31%, list=18%, signal=38%
GO_PROTON_TRANSPORTING_ATP_SYNTHASE_COMPLEX	GO_PROTON_TRANSPORTING_ATP_SYNTHASE_COMPLEX		22	0.336058	0.769871	0.692615	0.838071	1	8116	tags=45%, list=24%, signal=60%
GO_KERATIN_FILAMENT	GO_KERATIN_FILAMENT		55	0.228082	0.763633	0.741507	0.842829	1	10156	tags=25%, list=31%, signal=37%
GO_CHD_TYPE_COMPLEX	GO_CHD_TYPE_COMPLEX		17	0.283871	0.744398	0.782007	0.86684	1	5501	tags=35%, list=17%, signal=42%
GO_MOTILE_CILIUM	GO_MOTILE_CILIUM		91	0.192778	0.732945	0.8653	0.878115	1	5135	tags=19%, list=15%, signal=22%
GO_INNER_MITOCHONDRIAL_MEMBRANE_PROTEIN_COMPLEX	GO_INNER_MITOCHONDRIAL_MEMBRANE_PROTEIN_COMPLEX		101	0.274707	0.726135	0.701375	0.882676	1	10556	tags=45%, list=32%, signal=65%
GO_PROTON_TRANSPORTING_TWO_SECTOR_ATPASE_COMPLEX_PROTON_TRANSPORTING_DOMAIN	GO_PROTON_TRANSPORTING_TWO_SECTOR_ATPASE_COMPLEX_PROTON_TRANSPORTING_DOMAIN		21	0.280028	0.725466	0.749526	0.878655	1	8187	tags=33%, list=25%, signal=44%
GO_CLATHRIN_COATED_ENDOCYTIC_VESICLE_MEMBRANE	GO_CLATHRIN_COATED_ENDOCYTIC_VESICLE_MEMBRANE		46	0.22977	0.700936	0.806189	0.907478	1	6126	tags=22%, list=18%, signal=27%
GO_ENDOLYSOSOME	GO_ENDOLYSOSOME		15	0.268323	0.685459	0.825	0.921886	1	6126	tags=27%, list=18%, signal=33%
GO_DYNEIN_COMPLEX	GO_DYNEIN_COMPLEX		42	0.200881	0.685454	0.900459	0.916799	1	5654	tags=21%, list=17%, signal=26%
GO_STEREOCILIUM_BUNDLE	GO_STEREOCILIUM_BUNDLE		39	0.17967	0.674517	0.910714	0.924926	1	8702	tags=28%, list=26%, signal=38%
GO_INTRACILIARY_TRANSPORT_PARTICLE	GO_INTRACILIARY_TRANSPORT_PARTICLE		29	0.230276	0.661151	0.877408	0.935437	1	5177	tags=21%, list=16%, signal=24%
GO_RIBOSOMAL_SUBUNIT	GO_RIBOSOMAL_SUBUNIT		158	0.25323	0.656498	0.719298	0.935326	1	9155	tags=31%, list=28%, signal=43%
GO_TRANS_GOLGI_NETWORK_MEMBRANE	GO_TRANS_GOLGI_NETWORK_MEMBRANE		75	0.184975	0.653126	0.959114	0.933943	1	12251	tags=40%, list=37%, signal=63%
GO_MITOCHONDRIAL_MEMBRANE_PART	GO_MITOCHONDRIAL_MEMBRANE_PART		157	0.215681	0.643795	0.786539	0.938924	1	9682	tags=38%, list=29%, signal=54%
GO_AXONEME_PART	GO_AXONEME_PART		20	0.238746	0.643461	0.891104	0.934247	1	12489	tags=40%, list=38%, signal=64%
GO_NADH_DEHYDROGENASE_COMPLEX	GO_NADH_DEHYDROGENASE_COMPLEX		42	0.265276	0.643298	0.776923	0.929405	1	13767	tags=62%, list=41%, signal=105%
GO_MHC_PROTEIN_COMPLEX	GO_MHC_PROTEIN_COMPLEX		25	0.297538	0.630414	0.764591	0.936774	1	19449	tags=68%, list=58%, signal=164%
GO_ER_TO_GOLGI_TRANSPORT_VESICLE	GO_ER_TO_GOLGI_TRANSPORT_VESICLE		68	0.208273	0.627571	0.867784	0.934469	1	6997	tags=24%, list=21%, signal=30%
GO_AMPA_GLUTAMATE_RECEPTOR_COMPLEX	GO_AMPA_GLUTAMATE_RECEPTOR_COMPLEX		25	0.190833	0.588094	0.935211	0.961112	1	5403	tags=16%, list=16%, signal=19%
GO_ER_TO_GOLGI_TRANSPORT_VESICLE_MEMBRANE	GO_ER_TO_GOLGI_TRANSPORT_VESICLE_MEMBRANE		52	0.193898	0.56412	0.881801	0.97163	1	6997	tags=21%, list=21%, signal=27%
GO_GABA_RECEPTOR_COMPLEX	GO_GABA_RECEPTOR_COMPLEX		17	0.207445	0.528308	0.971233	0.984397	1	14706	tags=65%, list=44%, signal=116%
GO_MICROVILLUS_MEMBRANE	GO_MICROVILLUS_MEMBRANE		19	0.188558	0.516964	0.972093	0.984093	1	7474	tags=21%, list=22%, signal=27%
GO_OXIDOREDUCTASE_COMPLEX	GO_OXIDOREDUCTASE_COMPLEX		89	0.175076	0.514136	0.93633	0.980191	1	11524	tags=40%, list=35%, signal=62%
GO_RESPIRATORY_CHAIN	GO_RESPIRATORY_CHAIN		77	0.178067	0.461553	0.918129	0.990413	1	10556	tags=39%, list=32%, signal=57%
GO_SMALL_RIBOSOMAL_SUBUNIT	GO_SMALL_RIBOSOMAL_SUBUNIT		66	0.18445	0.460729	0.904854	0.985599	1	9408	tags=29%, list=28%, signal=40%

## Sheet: C2-KEGG
NAME	GS<br> follow link to MSigDB	GS DETAILS	SIZE	ES	NES	NOM p-val	FDR q-val	FWER p-val	RANK AT MAX	LEADING EDGE
KEGG_HOMOLOGOUS_RECOMBINATION	KEGG_HOMOLOGOUS_RECOMBINATION	Details ...	28	0.717581	1.94868	0.00556586	0.051044	0.073	4056	tags=61%, list=12%, signal=69%
KEGG_DNA_REPLICATION	KEGG_DNA_REPLICATION	Details ...	36	0.795365	1.94797	0.00974659	0.0257792	0.074	3298	tags=69%, list=10%, signal=77%
KEGG_BASE_EXCISION_REPAIR	KEGG_BASE_EXCISION_REPAIR	Details ...	34	0.695286	1.93006	0.00196464	0.0222281	0.092	5009	tags=62%, list=15%, signal=73%
KEGG_N_GLYCAN_BIOSYNTHESIS	KEGG_N_GLYCAN_BIOSYNTHESIS	Details ...	46	0.598077	1.89082	0.0122592	0.0248989	0.127	3142	tags=41%, list=9%, signal=46%
KEGG_CELL_CYCLE	KEGG_CELL_CYCLE	Details ...	124	0.564688	1.80076	0.0239852	0.0563137	0.252	4019	tags=46%, list=12%, signal=52%
KEGG_MISMATCH_REPAIR	KEGG_MISMATCH_REPAIR	Details ...	23	0.708386	1.76065	0.0375494	0.0699598	0.329	3003	tags=52%, list=9%, signal=57%
KEGG_PYRIMIDINE_METABOLISM	KEGG_PYRIMIDINE_METABOLISM	Details ...	94	0.513224	1.70863	0.0254083	0.0963066	0.431	3829	tags=36%, list=12%, signal=41%
KEGG_PROTEASOME	KEGG_PROTEASOME	Details ...	43	0.663445	1.65662	0.0766283	0.12903	0.544	9007	tags=81%, list=27%, signal=111%
KEGG_AMINOACYL_TRNA_BIOSYNTHESIS	KEGG_AMINOACYL_TRNA_BIOSYNTHESIS	Details ...	41	0.572351	1.61433	0.0438931	0.156032	0.633	3949	tags=44%, list=12%, signal=50%
KEGG_SELENOAMINO_ACID_METABOLISM	KEGG_SELENOAMINO_ACID_METABOLISM	Details ...	26	0.525496	1.60365	0.0154639	0.151517	0.668	4215	tags=38%, list=13%, signal=44%
KEGG_SPLICEOSOME	KEGG_SPLICEOSOME	Details ...	123	0.496354	1.53969	0.0833333	0.21305	0.775	6083	tags=43%, list=18%, signal=53%
KEGG_RNA_DEGRADATION	KEGG_RNA_DEGRADATION	Details ...	55	0.470829	1.52046	0.0692884	0.218741	0.807	6632	tags=45%, list=20%, signal=57%
KEGG_P53_SIGNALING_PATHWAY	KEGG_P53_SIGNALING_PATHWAY	Details ...	66	0.437059	1.51677	0.0333863	0.206048	0.809	4556	tags=35%, list=14%, signal=40%
KEGG_NUCLEOTIDE_EXCISION_REPAIR	KEGG_NUCLEOTIDE_EXCISION_REPAIR	Details ...	44	0.516377	1.51063	0.0839844	0.198317	0.812	3778	tags=36%, list=11%, signal=41%
KEGG_GLYCOSYLPHOSPHATIDYLINOSITOL_GPI_ANCHOR_BIOSYNTHESIS	KEGG_GLYCOSYLPHOSPHATIDYLINOSITOL_GPI_ANCHOR_BIOSYNTHESIS	Details ...	24	0.528628	1.51058	0.0529197	0.18517	0.812	8006	tags=54%, list=24%, signal=71%
KEGG_OTHER_GLYCAN_DEGRADATION	KEGG_OTHER_GLYCAN_DEGRADATION	Details ...	16	0.565201	1.50398	0.0718563	0.180698	0.825	11421	tags=63%, list=34%, signal=95%
KEGG_RIBOFLAVIN_METABOLISM	KEGG_RIBOFLAVIN_METABOLISM	Details ...	15	0.477987	1.47351	0.0736086	0.203596	0.859	2372	tags=27%, list=7%, signal=29%
KEGG_STEROID_BIOSYNTHESIS	KEGG_STEROID_BIOSYNTHESIS	Details ...	16	0.58844	1.42608	0.119792	0.248729	0.908	7677	tags=63%, list=23%, signal=81%
KEGG_DRUG_METABOLISM_OTHER_ENZYMES	KEGG_DRUG_METABOLISM_OTHER_ENZYMES	Details ...	51	0.385358	1.34525	0.119944	0.352773	0.969	3913	tags=20%, list=12%, signal=22%
KEGG_PURINE_METABOLISM	KEGG_PURINE_METABOLISM	Details ...	150	0.323764	1.22828	0.197731	0.549897	0.996	6146	tags=31%, list=18%, signal=38%
KEGG_VIBRIO_CHOLERAE_INFECTION	KEGG_VIBRIO_CHOLERAE_INFECTION		51	0.366372	1.22592	0.214408	0.528365	0.996	5179	tags=29%, list=16%, signal=35%
KEGG_GLYCEROPHOSPHOLIPID_METABOLISM	KEGG_GLYCEROPHOSPHOLIPID_METABOLISM		71	0.317147	1.18226	0.214826	0.594256	0.999	6805	tags=28%, list=20%, signal=35%
KEGG_GLYOXYLATE_AND_DICARBOXYLATE_METABOLISM	KEGG_GLYOXYLATE_AND_DICARBOXYLATE_METABOLISM		16	0.439802	1.17626	0.283019	0.581465	0.999	7086	tags=50%, list=21%, signal=64%
KEGG_FRUCTOSE_AND_MANNOSE_METABOLISM	KEGG_FRUCTOSE_AND_MANNOSE_METABOLISM		34	0.373384	1.17402	0.25729	0.561806	0.999	9044	tags=47%, list=27%, signal=65%
KEGG_ONE_CARBON_POOL_BY_FOLATE	KEGG_ONE_CARBON_POOL_BY_FOLATE		17	0.441809	1.16949	0.28125	0.548183	0.999	4409	tags=41%, list=13%, signal=47%
KEGG_PROTEIN_EXPORT	KEGG_PROTEIN_EXPORT		23	0.417846	1.16183	0.29128	0.542235	0.999	5300	tags=39%, list=16%, signal=47%
KEGG_PANTOTHENATE_AND_COA_BIOSYNTHESIS	KEGG_PANTOTHENATE_AND_COA_BIOSYNTHESIS		16	0.381644	1.15959	0.250809	0.526679	0.999	5259	tags=31%, list=16%, signal=37%
KEGG_RNA_POLYMERASE	KEGG_RNA_POLYMERASE		28	0.417892	1.132	0.330206	0.560912	1	6932	tags=43%, list=21%, signal=54%
KEGG_LYSOSOME	KEGG_LYSOSOME		119	0.328882	1.1286	0.310092	0.548209	1	8187	tags=37%, list=25%, signal=49%
KEGG_PROGESTERONE_MEDIATED_OOCYTE_MATURATION	KEGG_PROGESTERONE_MEDIATED_OOCYTE_MATURATION		83	0.312609	1.12582	0.320635	0.53497	1	1996	tags=19%, list=6%, signal=20%
KEGG_BASAL_TRANSCRIPTION_FACTORS	KEGG_BASAL_TRANSCRIPTION_FACTORS		34	0.369823	1.11133	0.333333	0.543209	1	3778	tags=26%, list=11%, signal=30%
KEGG_NOTCH_SIGNALING_PATHWAY	KEGG_NOTCH_SIGNALING_PATHWAY		47	0.300294	1.07424	0.350413	0.591248	1	6241	tags=32%, list=19%, signal=39%
KEGG_AMINO_SUGAR_AND_NUCLEOTIDE_SUGAR_METABOLISM	KEGG_AMINO_SUGAR_AND_NUCLEOTIDE_SUGAR_METABOLISM		44	0.339918	1.07152	0.364769	0.578309	1	6125	tags=39%, list=18%, signal=47%
KEGG_ALANINE_ASPARTATE_AND_GLUTAMATE_METABOLISM	KEGG_ALANINE_ASPARTATE_AND_GLUTAMATE_METABOLISM		32	0.326211	1.06698	0.356482	0.568807	1	5953	tags=28%, list=18%, signal=34%
KEGG_MATURITY_ONSET_DIABETES_OF_THE_YOUNG	KEGG_MATURITY_ONSET_DIABETES_OF_THE_YOUNG		24	0.336842	1.04202	0.435714	0.596203	1	14030	tags=58%, list=42%, signal=101%
KEGG_O_GLYCAN_BIOSYNTHESIS	KEGG_O_GLYCAN_BIOSYNTHESIS		27	0.332397	1.01928	0.450769	0.619694	1	6879	tags=30%, list=21%, signal=37%
KEGG_CYSTEINE_AND_METHIONINE_METABOLISM	KEGG_CYSTEINE_AND_METHIONINE_METABOLISM		34	0.315419	1.00832	0.46118	0.62172	1	5076	tags=26%, list=15%, signal=31%
KEGG_UBIQUITIN_MEDIATED_PROTEOLYSIS	KEGG_UBIQUITIN_MEDIATED_PROTEOLYSIS		134	0.263368	1.00118	0.461404	0.61783	1	6352	tags=28%, list=19%, signal=35%
KEGG_GLUTATHIONE_METABOLISM	KEGG_GLUTATHIONE_METABOLISM		48	0.327408	1.00058	0.458991	0.602994	1	13242	tags=54%, list=40%, signal=90%
KEGG_GLYCOSAMINOGLYCAN_BIOSYNTHESIS_HEPARAN_SULFATE	KEGG_GLYCOSAMINOGLYCAN_BIOSYNTHESIS_HEPARAN_SULFATE		26	0.321455	0.996966	0.446875	0.593429	1	8858	tags=42%, list=27%, signal=58%
KEGG_SPHINGOLIPID_METABOLISM	KEGG_SPHINGOLIPID_METABOLISM		36	0.292749	0.96686	0.503135	0.627556	1	6073	tags=28%, list=18%, signal=34%
KEGG_GLYCEROLIPID_METABOLISM	KEGG_GLYCEROLIPID_METABOLISM		42	0.262815	0.936993	0.580229	0.661148	1	6571	tags=33%, list=20%, signal=41%
KEGG_SYSTEMIC_LUPUS_ERYTHEMATOSUS	KEGG_SYSTEMIC_LUPUS_ERYTHEMATOSUS		124	0.312596	0.931757	0.571633	0.654365	1	6229	tags=30%, list=19%, signal=37%
KEGG_AMYOTROPHIC_LATERAL_SCLEROSIS_ALS	KEGG_AMYOTROPHIC_LATERAL_SCLEROSIS_ALS		51	0.264805	0.925323	0.556439	0.649534	1	4278	tags=22%, list=13%, signal=25%
KEGG_PORPHYRIN_AND_CHLOROPHYLL_METABOLISM	KEGG_PORPHYRIN_AND_CHLOROPHYLL_METABOLISM		41	0.262938	0.886779	0.611367	0.69395	1	2861	tags=12%, list=9%, signal=13%
KEGG_BIOSYNTHESIS_OF_UNSATURATED_FATTY_ACIDS	KEGG_BIOSYNTHESIS_OF_UNSATURATED_FATTY_ACIDS		20	0.299493	0.829025	0.667221	0.769359	1	6565	tags=35%, list=20%, signal=44%
KEGG_GALACTOSE_METABOLISM	KEGG_GALACTOSE_METABOLISM		24	0.28254	0.828272	0.658929	0.754236	1	4764	tags=29%, list=14%, signal=34%
KEGG_BLADDER_CANCER	KEGG_BLADDER_CANCER		40	0.242862	0.789982	0.748115	0.797183	1	10576	tags=48%, list=32%, signal=70%
KEGG_GLYCOSAMINOGLYCAN_DEGRADATION	KEGG_GLYCOSAMINOGLYCAN_DEGRADATION		21	0.284301	0.788109	0.722222	0.783783	1	4994	tags=29%, list=15%, signal=34%
KEGG_PENTOSE_AND_GLUCURONATE_INTERCONVERSIONS	KEGG_PENTOSE_AND_GLUCURONATE_INTERCONVERSIONS		27	0.253513	0.759801	0.747384	0.808825	1	7676	tags=26%, list=23%, signal=34%
KEGG_ANTIGEN_PROCESSING_AND_PRESENTATION	KEGG_ANTIGEN_PROCESSING_AND_PRESENTATION		67	0.252176	0.692146	0.728782	0.881533	1	8586	tags=24%, list=26%, signal=32%
KEGG_OXIDATIVE_PHOSPHORYLATION	KEGG_OXIDATIVE_PHOSPHORYLATION		115	0.236761	0.671745	0.762712	0.887903	1	10771	tags=43%, list=32%, signal=63%
KEGG_CYTOSOLIC_DNA_SENSING_PATHWAY	KEGG_CYTOSOLIC_DNA_SENSING_PATHWAY		42	0.208119	0.604058	0.900855	0.935891	1	6932	tags=29%, list=21%, signal=36%
KEGG_STEROID_HORMONE_BIOSYNTHESIS	KEGG_STEROID_HORMONE_BIOSYNTHESIS		53	0.122124	0.401838	0.998695	0.995218	1	13935	tags=42%, list=42%, signal=71%

## Sheet: Prognosis related genes
probe_id	median	low	hight	logrank.p.val
RP5-1136G13.2	162.635	203	203	0.000778064
ATF7IP2	631.075	203	203	0.00410924
P4HA3	132.258	203	203	0.00248488
RP3-508I15.22	6.74252	203	203	0.0050137
RP11-324O2.3	25.2933	204	202	0.01461
ARHGEF17	1360.88	203	203	0.0141476
IGKV2-28	0.781935	204	202	0.0483918
CHCHD3P3	7.93214	203	203	0.00881153
MYCT1	165.682	204	202	0.0240649
LA16c-312E8.4	5.0015	204	202	0.00388361
MIR4453	133.243	203	203	0.00132951
OCIAD1-AS1	7.49972	202	204	0.000251293
RPL21P120	4.21712	202	204	0.00543676
ENTPD2	143.14	203	203	0.0483586
PLA2G2F	1782.5	204	202	0.000575541
CUZD1	52.2589	202	204	0.00503804
ZBTB12	390.04	203	203	0.0153247
SCRN2	1932.95	203	203	0.0388431
CTC-523E23.5	12.5338	203	203	0.0164418
GAPDHP32	1.24311	202	204	0.0110321
HOMER1	570.577	204	202	0.00273575
PSMB5	5620.36	202	204	0.00490896
RP11-33E12.2	134.643	202	204	0.0261273
ZNF826P	154.917	203	203	0.0497591
IGDCC4	112.608	203	203	0.0233408
RP11-323I15.2	1.71056	204	202	0.0395096
WASH7P	350.222	204	202	0.000343037
SUN1	5409.01	202	204	0.0183201
STYX	944.136	203	203	0.00206071
ZNF775	662.517	203	203	0.0404959
C3orf62	588.88	203	203	0.00407956
CYP4F29P	40.8868	203	203	0.0134245
TRAV18	0.859245	203	203	0.0435674
TNFSF15	341.828	203	203	0.0404882
ARGLU1	3464.81	204	202	0.00257306
SOX5	26.5293	204	202	0.0413542
VKORC1L1	2359.41	203	203	0.0262702
CTD-3247H4.2	0.657505	203	203	0.0133804
CTB-107G13.1	0.67014	203	203	0.0498616
RP3-337H4.10	2.96792	203	203	0.0325828
SRSF10	4423.72	203	203	0.0423999
ZNF615	325.431	203	203	0.0393124
LPIN3	1214.87	202	204	0.0189906
RP11-235E17.2	5.85857	204	202	0.0283528
ZDHHC15	16.9547	204	202	0.00650125
OSTCP2	1.41323	203	203	0.00289993
TM9SF4	5841.41	202	204	0.00963829
CTC-490E21.11	16.1237	202	204	0.0337054
RP11-539L10.2	47.1568	203	203	0.00459455
CTD-2302E22.4	4.03078	203	203	0.0470347
RP11-687E1.2	3.92	203	203	0.0349638
RP11-304L19.12	2.49848	204	202	0.0142673
SLITRK2	1.77103	204	202	0.0275799
TRBJ2-3	2.33028	204	202	0.0133312
RP11-286E11.2	1.05219	204	202	0.00311725
PCDHB7	67.0894	203	203	0.0110736
ZNF33BP1	1.75591	204	202	0.0105026
CRYGS	82.1352	203	203	0.0160372
GUCY1B3	293.674	204	202	0.027918
METTL18	356.335	204	202	0.00714772
CCNO	371.762	203	203	0.0310169
ADCY10P1	202.424	204	202	0.000713888
NSUN5P1	648.343	203	203	0.00014863
RP11-171I2.4	3.27642	203	203	0.0011999
OR7M1P	0.625559	203	203	0.0233226
KPNB1	12319.5	204	202	0.0338152
ZNF841	521.867	204	202	6.73e-05
CLIC3	764.875	204	202	0.0408242
ADK	1572.15	203	203	0.0479025
KB-1572G7.2	28.9231	203	203	0.000184644
PACRG-AS1	0.686779	203	203	0.0157317
NEBL	1351.72	204	202	0.0350575
ABCG4	11.1346	203	203	0.00655998
S100A5	42.1072	203	203	0.0226733
ARL4C	2190.83	203	203	0.000232428
RP3-402G11.26	28.324	203	203	0.00586585
AC092569.2	2.81011	203	203	0.00312492
RP11-6L6.4	6.105	204	202	0.048898
RP11-478C19.2	8.00312	202	204	0.0241478
ZNF547	99.3224	203	203	0.0241486
OSGEPL1-AS1	11.6798	203	203	0.00419603
STAG1	1173.85	203	203	0.0191761
RP11-449G16.1	5.95394	203	203	0.0160942
EMC3-AS1	166.761	204	202	0.0481665
FGF1	53.4153	203	203	0.00694778
AC021218.2	3.10597	202	204	0.00587712
MUC16	27.2859	203	203	0.042383
CRYBG3	520.089	204	202	0.0344076
ITGB1	10489.9	203	203	0.0106582
QKI	2868.54	204	202	0.0340735
RP11-323F24.4	1.82703	203	203	0.00131781
GSTT2B	46.4277	204	202	0.0112527
MIR325HG	1.31369	204	202	0.0375303
NPHP3	370.378	203	203	0.00662691
HIST4H4	49.6657	204	202	0.00725202
CUL1	3489.01	203	203	0.000723997
AC004009.3	1.45866	204	202	0.0432927
ZNF223	75.9965	203	203	0.00134809
L1CAM	59.009	203	203	0.039863
SURF4	11511	204	202	0.0142548
AC002454.1	1.90487	203	203	0.00444798
EBAG9	1038.31	202	204	0.0417459
CDC42BPA	1903.06	203	203	0.0111569
KDM4C	664.563	203	203	0.0418677
SH2D1B	9.17972	204	202	0.0191564
NDUFV2	660.678	203	203	0.00512531
PNO1	1275.79	203	203	0.0205801
RP11-452L6.6	16.8648	203	203	0.00338819
RP11-449J21.5	29.1261	204	202	0.0226563
CARM1	2406.54	203	203	0.00306033
LA16c-425C2.1	2.3322	202	204	0.0478015
RP11-384K6.8	2.65277	204	202	0.0380253
CTD-2368P22.1	162.086	202	204	0.0304961
NAALADL2	459.547	203	203	0.00900923
PCDHGB3	10.6886	203	203	0.035639
RP11-417E7.2	5.11946	203	203	0.0391459
LRP12	514.016	202	204	0.00785715
ZNF211	694.367	203	203	0.00611729
CUL9	1762.28	203	203	0.0105283
KIAA1210	1.70742	203	203	0.0026014
DNAH1	265.002	204	202	0.00178416
PROS1	465.919	204	202	0.00108057
RP11-295P9.12	4.53785	203	203	0.00532976
GALNT16	36.5894	204	202	0.00141817
FN1	44200.8	203	203	0.004356
RGS19	1007.22	203	203	0.00284477
COL4A2	15807.4	203	203	0.00982912
RPE	1514.56	204	202	0.028933
PISD	1890.45	203	203	0.008235
CCDC73	24.6792	202	204	0.0148405
EIF4B	10950.6	203	203	0.0335817
ZNF570	284.228	202	204	0.0477202
PDE5A	431.275	204	202	0.0161992
APCDD1L	42.5951	203	203	0.00972064
RP11-131L12.3	12.6609	203	203	0.0148593
ZNF814	484.932	203	203	1.06e-05
RP11-21B23.2	2.82616	202	204	0.0429464
WIPI2	4476.69	202	204	0.0323703
MEF2C-AS1	4.54395	203	203	0.00347392
LINC01615	27.2415	203	203	0.0127298
WNT11	46.7528	203	203	0.0137396
PSKH1	1425.55	204	202	0.00475394
RP11-701H16.4	1.16848	203	203	0.0117471
CAST	10896	203	203	0.0428805
CTD-2270L9.4	58.5352	204	202	0.0203455
RP11-204C16.4	29.6155	203	203	0.048902
RP11-269G24.7	1.58669	203	203	0.0385769
RP11-562A8.5	2.34792	203	203	0.00528464
PCED1B	660.829	203	203	0.0145841
CEACAM22P	1.5862	203	203	0.00243123
RP11-305L7.3	1.54661	203	203	0.047542
NTNG1	14.6696	204	202	0.0492237
MPP6	361.64	203	203	0.0266268
RP13-131K19.1	4.8809	204	202	0.0043797
RP3-523E19.2	15.0165	202	204	0.0426384
FGF11	39.9191	203	203	0.0134379
ZNF250	497.105	202	204	0.0021677
ZNF426	779.443	202	204	0.00419702
RRS1-AS1	3.66141	203	203	0.00949201
RP11-568K15.2	0.877578	202	204	0.0487768
HTRA1	3564.92	203	203	4.47e-06
EMC7	2313.69	202	204	0.0227682
PCDH10	21.4731	204	202	0.000739903
CTD-2008P7.1	4.1897	203	203	0.0164877
SH2D2A	335.631	204	202	0.0134038
RP11-77P6.2	42.2763	202	204	0.00029109
C9orf173-AS1	8.9481	203	203	0.019855
RP1-71H24.1	0.875442	203	203	0.00639048
AC005682.5	52.463	203	203	0.0376796
RP11-54A9.1	6.18022	203	203	0.0418119
OLA1P3	0.690119	203	203	0.0104866
AGAP12P	14.5386	202	204	0.00471859
RP13-578N3.3	0.841453	203	203	0.0234664
RP11-346C20.3	35.9305	202	204	0.00166938
CHRDL1	23.8942	204	202	0.0133179
ACOXL	194.296	204	202	0.00118498
CDCA2	433.751	203	203	0.0333125
RP11-181C21.4	8.88068	203	203	0.0449879
RP11-1143G9.5	3.60823	204	202	0.00118866
STRN3	1189.61	202	204	0.00315981
TMEM59L	10.7937	204	202	0.0356896
PGAM4	2.46558	202	204	0.0260565
RP11-383C6.2	1.3835	203	203	0.0176757
SPIN3	135.685	203	203	0.0108847
PGAM1P7	3.39203	203	203	0.0465438
SMIM15	2380.69	202	204	0.0480987
SMG1P7	104.026	203	203	0.0293863
TCEANC	106.399	204	202	0.00963355
RP11-462B18.3	0.78025	203	203	0.000977108
BCL2L14	103.084	204	202	3.53e-05
LINC00890	1.72075	203	203	0.0343005
RP11-458I7.1	2.20907	203	203	0.029096
PCDHGA1	46.6567	203	203	0.00212845
CTD-2306A12.1	2.97453	203	203	0.00687054
RANP4	6.37259	202	204	0.00386823
RBM4	617.236	202	204	0.0395321
ZNF345	193.12	203	203	0.00175447
CYP2D7	38.6829	203	203	0.0216792
ADAMTS18	8.72248	204	202	0.00290329
STEAP1B	10.5055	203	203	0.0278387
ABT1	2037.95	204	202	0.00809361
RP11-51O6.1	173.215	203	203	0.0476319
PHGDH	4005.09	203	203	0.00754828
AP001347.6	19.7879	203	203	0.0149852
AC006947.1	0.793738	203	203	0.0473053
CNN1	723.263	204	202	0.0152779
RP11-806L2.5	0.767419	204	202	0.0313524
CCT3	16552.9	203	203	0.0396576
TGFB1I1	1003.68	203	203	0.000465724
RP11-755F10.1	47.7774	203	203	0.0352107
KIF28P	22.6824	203	203	0.00854215
GOLGA8UP	0.826032	202	204	0.0467201
RP11-127I20.5	15.3299	203	203	0.00164527
SMC1B	62.3968	203	203	0.0192427
OMD	8.68443	203	203	0.0134063
ZNF784	453.625	202	204	0.00685774
RP11-348H3.2	1.37873	203	203	0.0440184
MYO1C	9907.75	203	203	0.0214327
TEKT5	23.7483	203	203	0.00513236
BMP6	86.538	204	202	0.0090592
ADCY7	210.324	203	203	0.0440496
GLG1	7986.53	203	203	0.00153869
RP11-526I2.5	52.6829	204	202	0.00591403
RP11-24F11.2	13.971	204	202	0.00717166
APOBEC3D	310.145	203	203	0.00328016
RNF2P1	0.974365	203	203	0.00814671
RP11-388M20.7	0.852974	203	203	0.00644673
STK32A	129.289	203	203	0.00905302
RP11-609D21.3	6.47222	204	202	0.0103234
PENK	1.87984	203	203	0.0243503
TMEM238	280.259	203	203	0.0441585
AC004775.5	0.676442	203	203	0.0278765
URB1	2094.86	202	204	0.00927491
SLC25A51	384.22	202	204	0.0432864
KRT8	71933.1	204	202	0.0168629
RP11-230F18.6	3.55302	203	203	0.0361938
RP11-762L8.6	22.8559	204	202	0.0158137
KRT89P	0.847905	203	203	0.018652
PTOV1-AS2	169.115	203	203	0.000572537
HDAC6	2352.76	204	202	0.0187893
LATS2	802.211	203	203	0.00598636
LINC01359	4.55229	202	204	0.00880529
RPL7AP3	0.520146	202	204	0.0475532
SNORD14A	26.3944	203	203	0.0124764
C20orf203	4.4789	203	203	0.000571815
PAQR8	538.845	204	202	0.00439968
RP11-410L14.2	34.3103	203	203	0.0104027
ISCU	3311.98	203	203	0.010664
HS3ST5	10.7353	204	202	0.0348566
KLHDC4	1588.75	202	204	0.0186842
MPI	1705.37	202	204	0.0200221
ABHD4	1934.08	203	203	0.0254791
RP11-311P8.2	9.4598	203	203	0.0406897
DNAJC27-AS1	42.2866	203	203	0.00528174
RP1-273G13.1	1.09841	203	203	0.0229857
RP3-323P24.3	7.94432	203	203	0.0449827
IPMK	505.374	203	203	0.00299555
RP11-186B7.4	80.479	203	203	0.032197
RP4-680D5.2	7.64176	202	204	0.00272644
RP1-266L20.9	24.9998	204	202	0.0121176
FAM200B	914.684	203	203	0.000295228
RAN	12559.3	202	204	0.00635241
SYNC	52.0753	203	203	0.000462243
RP11-22P6.2	7.25479	203	203	0.0187145
AC008079.10	23.4648	202	204	0.00993112
RP11-685B14.1	2.26629	204	202	0.0182226
MRTO4	2988.75	202	204	0.0278584
BECN2	0.782672	203	203	0.000901566
MTCO1P11	1.37522	204	202	0.000516518
ZNF169	94.3377	203	203	0.00182188
HMGB3P32	0.649862	204	202	0.00529653
SGK223	984.705	203	203	0.00876402
JUN	8606.64	203	203	0.0273856
DECR2	741.555	203	203	0.0455222
ACAT1	1214.39	203	203	0.0143298
TOP3B	23.6644	202	204	0.0132751
PNISR	2957.48	203	203	0.000527426
PTPRD	46.8775	204	202	0.0202408
SIGMAR1	3741.94	203	203	0.0391359
RP11-568J23.8	37.3544	202	204	0.0229514
TMEM199	852.799	203	203	0.0374544
TMEM35A	22.5611	203	203	0.0316148
RPL32P34	0.576875	203	203	0.000203984
NXN	2084.3	202	204	0.00677239
PXDNL	22.1604	203	203	0.00992826
SENP3	1106.63	202	204	0.0306095
ZNF266	1615.14	203	203	7.82e-05
SPRN	205.91	203	203	0.00701034
RP11-131L12.4	8.29825	203	203	0.0132002
FNBP4	2660.59	203	203	0.00469644
TMEM255A	16.9947	203	203	0.00479063
MIR6819	1.35373	203	203	3.42e-05
NKIRAS1	313.476	204	202	0.0105734
AC008982.2	9.30439	204	202	0.00897655
LRRC32	968.926	203	203	0.00129724
CTD-2267D19.1	13.6182	202	204	0.00637195
SLC22A5	734.154	202	204	0.0202629
C19orf45	45.5474	203	203	0.0317497
SNTG1	9.04505	204	202	0.00236911
RP13-36G14.4	45.3755	202	204	0.00381474
AC011290.5	19.7243	202	204	0.000896576
EPHB2	1355.02	202	204	0.00737052
USP49	365.013	202	204	0.0103938
SLC7A1	2610.13	203	203	0.00905971
ARHGAP5-AS1	148.847	203	203	0.000326448
RLN2	13.9492	204	202	0.0381578
CNTN1	110.776	203	203	0.0102887
RP11-626G3.1	1.77524	203	203	0.00124318
NTN1	167.659	203	203	0.0193768
SNORA81	1.16955	203	203	0.0209811
CYP4F26P	28.4047	202	204	0.00458465
GNA12	3070.41	203	203	0.000533096
NEU1	3782.18	204	202	0.0243756
RP11-632K20.2	2.05411	204	202	0.00503163
CTD-2587H19.3	1.68511	204	202	0.00208168
B4GAT1	663.336	203	203	0.011945
FAM120A	8540.74	204	202	0.0310949
SPATA12	11.3494	203	203	0.0287622
BHLHE41	2468.59	204	202	0.000464675
PTPRR	185.065	203	203	0.00159839
ARID3C	3.72153	203	203	0.0262685
HTR4	0.719892	204	202	0.00142756
RP11-414C23.1	4.43976	203	203	0.00245114
AES	19522.1	202	204	0.0350525
RP13-228J13.1	1.16985	203	203	0.00162423
KIF12	42.2361	204	202	0.0367685
AKAP7	225.162	204	202	0.00235934
ATG3	2131.77	203	203	0.0327865
CTB-113I20.2	24.065	203	203	0.00829329
RP4-675C20.4	2.15031	203	203	0.0445182
EFCAB8	6.62628	204	202	0.00513499
DCAF16	1476.29	203	203	0.0496043
PCDHGB2	36.1224	202	204	0.000246943
C19orf73	56.5781	203	203	0.0479173
CCDC78	77.4522	203	203	0.0389225
ATRNL1	12.2647	203	203	0.0381043
GTF2IRD2P1	6.93467	202	204	0.013068
GLIS2	699.503	203	203	0.016304
SLCO1B3	0.826551	203	203	0.0228743
SNORA26	1.56052	203	203	0.0163372
ZNF296	317.271	203	203	0.00121983
HID1	3630.78	204	202	0.00248754
LINC01556	1.03676	204	202	0.0379423
RPL34P34	3.20149	204	202	0.0232592
UBA7	2924.73	204	202	0.00456577
RP11-161M6.6	9.71388	204	202	0.0319137
DPYSL4	38.0133	203	203	0.0141482
GS1-358P8.4	744.441	202	204	0.00283472
SARM1	268.384	203	203	0.00321291
CTD-2287O16.5	61.9704	203	203	0.000361566
RP4-655J12.4	2.44291	203	203	0.0120907
HEYL	428.143	203	203	0.000524123
PPP1R26-AS1	83.9605	203	203	0.000583145
EFEMP1	896.921	203	203	0.000532249
BDNF	33.3366	204	202	0.0200093
GINM1	2076.74	202	204	0.0359155
USF1	3279.25	203	203	0.0016728
ARHGDIA	13568.8	203	203	0.0460894
RP1-50J22.4	5.89958	204	202	1.57e-06
AC024704.2	1.16289	204	202	0.0107559
SMAD2	3477.1	204	202	0.00976625
MAPK8IP3	2680.8	204	202	5.15e-05
CTD-3214H19.6	19.3877	203	203	0.0258573
C6orf15	0.875279	204	202	0.0195244
NRIR	9.81296	203	203	0.0350273
ITGB3	40.3791	204	202	0.0455241
RPL29P19	22.0279	202	204	0.0191729
IGBP1P1	1.16514	203	203	0.0439295
RP11-814H16.2	2.7806	203	203	0.000641757
CERK	880.193	203	203	0.0143243
BEST2	1.6181	203	203	0.0022617
PLA2G6	595.794	203	203	0.00480823
RP1-168L15.6	2.77749	204	202	0.00514943
PHLDA1	4218.87	203	203	0.00801783
RP11-366L20.2	9.89074	203	203	0.0125809
MACF1	6328.19	203	203	0.0408331
ABRACL	2324.12	203	203	0.000301984
RP11-432F4.2	1.02313	202	204	0.0169822
ABHD14A-ACY1	11.9101	202	204	0.0242183
RP11-597D13.7	4.69585	203	203	0.0127545
CDC73	1562.15	203	203	0.00267216
ZNRF1	1941.29	204	202	0.0437213
TTC34	14.5376	203	203	0.0159494
BCDIN3D	251.784	202	204	0.03792
TTC36	7.43364	202	204	0.0217323
CCT6P1	238.523	202	204	0.00980466
RP11-517I3.1	11.9851	202	204	0.00804971
MYC	3219.44	203	203	0.00255259
MFSD4B	244.308	203	203	0.0458501
C2-AS1	1.82209	204	202	0.015918
TUBGCP6	2240.56	204	202	0.00610829
NKIRAS2	3001.84	203	203	0.029441
AC005009.1	2.05304	203	203	0.0188047
FKTN	709.125	204	202	0.00075388
KB-1980E6.3	1.64045	204	202	0.000676948
UTP6	2320.07	203	203	0.0160232
SLC23A2	1900.15	203	203	0.00149496
COL8A2	494.993	203	203	0.00139859
BTN3A1	1437.44	204	202	0.00602987
PSMB10	1684.2	204	202	0.0282609
RP11-583F2.6	3.44002	202	204	0.00742913
ARSJ	88.0393	203	203	0.025314
RPS11P5	38.95	204	202	0.0445205
CTD-2227E11.1	21.3993	203	203	0.0127376
RP11-778D9.13	7.32204	203	203	0.0118271
CTD-2270P14.1	284.911	202	204	0.00167934
RNF217	667.628	202	204	0.000253787
KRT18P21	0.761485	204	202	0.0429141
SIRT5	874.515	203	203	0.0338024
TULP3	1054.38	203	203	0.0250792
RNU6-1095P	2.04511	203	203	0.00675771
RASD2	165.064	203	203	0.0396297
PDCD1LG2	71.0794	204	202	0.0486997
SPARCL1	3006.79	204	202	0.000905839
AC003088.1	1.04642	204	202	0.0443653
AC012512.1	1.90033	203	203	0.022448
CRACR2B	1130.24	203	203	0.0381614
RP11-355O1.11	58.2844	203	203	0.0246477
RP11-24M17.4	4.99759	203	203	0.0361144
CCDC39	77.8142	203	203	0.0175679
HSD11B1	62.3777	204	202	0.020761
CTD-3195I5.3	16.1252	203	203	0.00553645
HNRNPA1P53	1.90421	203	203	0.0107789
MAPRE2	935.735	204	202	0.0345036
THA1P	2.63034	203	203	0.016369
LINC00649	523.337	203	203	0.0051963
RBM10	3889.99	203	203	0.0225543
TCEAL2	8.08948	203	203	0.0194579
VWA3A	4.80764	203	203	0.0169341
RNFT2	193.021	202	204	0.0380593
ICAM5	40.8527	203	203	0.0294549
BNIP3P27	3.13084	203	203	0.000805442
CTD-2145A24.4	0.51325	204	202	0.00165895
RP11-661O13.1	8.35915	203	203	0.0261539
CTB-39G8.3	49.5504	203	203	0.0024703
RP11-497E19.1	1.76535	203	203	0.00688193
HAUS3	701.646	203	203	0.00561444
ZNF768	2683.6	202	204	0.00357702
AC002117.1	3.79832	203	203	0.0102724
OR5BK1P	0.858826	202	204	0.00889809
RP11-834C11.5	2.12906	203	203	0.00469628
CPSF3	2590.16	204	202	0.00446068
RP11-361L15.5	14.8958	203	203	0.0331234
DYM	1678.02	203	203	0.00121941
RP11-74J13.9	15.7627	203	203	0.0273068
ARHGDIB	9027.54	203	203	0.0172306
RP11-132F7.2	10.7454	203	203	0.00621651
RPP25L	1153.71	203	203	0.0108353
RP11-92C4.6	5.78596	204	202	0.00808478
ATXN1	1062.33	203	203	0.0394646
ODF2L	1627.06	202	204	0.00903606
ZNF208	9.75587	203	203	0.0220959
RP1-257A7.4	22.7098	203	203	0.0386323
SPAG9	3704.61	204	202	0.00332713
ZNF248	532.083	204	202	0.0123317
TTLL13P	9.4799	203	203	0.00366667
CNKSR1	2199.63	203	203	0.00770214
RP11-1260E13.3	3.79713	204	202	0.0132438
EHBP1	1517.07	202	204	2.38e-05
SLC27A6	8.22852	203	203	0.00974977
PDE3A	129.182	203	203	0.0345622
RP11-603J24.14	1.21492	204	202	0.0155192
RP11-335G20.7	1.13907	204	202	0.0339426
ST13P19	1.82846	204	202	0.03306
EXTL3	1934.92	202	204	0.00634944
AC017060.1	42.3195	203	203	0.013141
ZNF106	1853.29	203	203	0.00447168
NEUROD2	1.94285	202	204	0.0164242
CTB-186H2.2	0.676099	204	202	0.0130267
AP000892.6	118.312	204	202	0.00680796
AC008746.12	30.7653	203	203	0.000284479
RBM24	18.1713	204	202	0.00967049
U2AF1L4	407.804	204	202	0.00917024
TRIM27	3450.09	203	203	0.0102268
RP11-544L8__B.4	1.27274	203	203	0.00182857
RP11-426A6.5	15.2866	203	203	0.0107146
RNF34	1466.75	203	203	0.00136035
RP5-901A4.1	14.8271	202	204	0.0158453
TMEM109	5686.43	203	203	1.51e-05
B9D2	310.503	203	203	0.0208142
NFIC	3361.88	203	203	0.0190803
PCNX4	1367.64	203	203	0.0420621
MDM4	1506.13	203	203	0.00788278
RBBP8NL	622.548	203	203	0.00182623
RP11-787I22.3	4.76552	203	203	0.0349664
ADAM9	4342.04	202	204	0.021967
PRR15L	328.715	204	202	0.0156494
ERICH5	231.379	204	202	0.0014233
CES1	159.86	203	203	0.00674436
ZMIZ2	5853.2	204	202	0.0371343
CTC-542B22.2	14.7314	203	203	0.010121
LRRN4	5.99647	204	202	0.0286539
SLC10A5	25.1011	203	203	0.00129981
ECM2	145.331	203	203	0.0387299
CTD-2017D11.2	24.7104	204	202	0.0435154
RP11-806O11.1	10.6635	203	203	0.0141471
ENPEP	259.874	203	203	0.0244272
AP3D1	8001.25	204	202	0.0118448
VSTM4	316.553	203	203	0.00360905
RP11-506H21.5	6.5725	203	203	0.00242216
CNTD1	64.8239	203	203	0.00159108
PRRT1	186.856	203	203	0.0300878
AC004967.7	126.911	203	203	0.00158004
RP11-158M2.5	2.35366	202	204	0.00578913
MUC19	1.18362	204	202	0.00522852
ELDR	0.976173	203	203	0.0208495
RP1-47A17.1	1.26069	202	204	0.00240484
HOXB5	202.33	202	204	0.00221955
AC132008.1	1.53019	204	202	0.0296416
TMEM178A	44.5693	204	202	0.0137029
PCDHGA5	27.3096	203	203	0.0240893
SERPINA3	2.20056	203	203	0.00570442
AC011298.2	2.51564	203	203	0.000668689
CEP95	1441.53	203	203	0.00555524
ZNF546	123.641	202	204	0.000204116
PITX3	1.38472	203	203	0.0199926
TAMM41	521.937	204	202	0.0380678
PACRG	17.8628	203	203	0.0406063
PRDX4	3591.86	204	202	0.00791992
RP11-55L4.2	0.782557	203	203	0.0287274
RP11-204M4.2	9.73802	203	203	0.0177338
HIST1H2AH	2.16131	203	203	0.0369008
TMEM262	61.823	202	204	0.0214083
ZNF502	237.508	203	203	0.0250007
MRPL37	3794.95	202	204	0.00655328
KIAA2022	5.02407	204	202	0.0109194
ATP8B2	585.705	203	203	0.00681881
CYP2D6	34.5547	202	204	0.00497567
INHBB	255.773	203	203	0.0123031
RP11-129K12.1	1.40537	204	202	0.00178253
LRRC42	1528.18	202	204	0.00343931
SPTBN2	2128.01	203	203	0.0355725
RP11-903H12.3	2.59648	202	204	0.047928
RP11-228B15.4	70.0187	202	204	0.000424759
RP4-612B18.3	1.812	202	204	0.0342263
VPS18	1797.52	203	203	0.00863466
RP11-84A19.3	12.8549	202	204	0.0178522
MTHFSD	901.782	203	203	0.0145551
RP11-29H23.7	5.6397	204	202	0.0130653
SP2	1338.38	204	202	0.0367809
NDUFA6-AS1	54.9575	202	204	0.0484285
SLC16A8	36.9362	203	203	0.0025268
RAB20	1270.33	204	202	0.0345595
FBXO32	1827.11	204	202	0.0155933
CROCCP2	893.14	202	204	0.0114534
RP11-666A8.8	14.5182	203	203	0.00148977
IFT20	1281.18	203	203	0.0259367
RP11-267M23.1	117.207	202	204	0.00386141
RP11-29B2.6	6.12166	203	203	0.00377111
AP3M2	1166.89	202	204	0.0479147
SNX24	448.255	203	203	0.0102961
ZNF84	1220.72	203	203	0.0342348
RPS3AP34	1.65327	204	202	0.0394097
LARP7	2023.69	204	202	0.0370073
LNX1	583.279	203	203	0.0445211
CHGA	3.27902	204	202	0.0335073
AC007773.2	35.023	203	203	0.0468081
RP11-178L8.4	3.42502	202	204	0.039283
LINC01152	2.36281	202	204	0.02701
RP11-214K3.22	1.64411	203	203	0.0132468
RP11-245J9.6	2.24956	202	204	0.00124771
EMP1	4092.91	203	203	2.66e-05
WASIR1	1.31035	202	204	0.0147906
AL137860.1	1.45772	203	203	0.00373073
RP11-140I16.3	11.7477	204	202	0.0324859
LINC00562	8.57611	202	204	0.00538395
RP3-466P17.1	5.71488	203	203	0.0424961
RP4-758J24.6	16.4625	203	203	0.040276
PRR16	71.3713	203	203	0.00765877
SP1	5675.32	202	204	0.032227
PSME1	9841.32	203	203	0.0154984
CATSPERG	76.9186	203	203	0.00289904
RUNX1T1	52.7362	203	203	0.0134551
GTF2IP23	16.2471	203	203	0.0310454
IKZF3	1224.84	204	202	0.0353604
C3orf20	4.38837	204	202	0.0117687
ACKR3	1716.5	203	203	0.0461072
RP11-789C17.1	13.8453	204	202	0.0006865
ST8SIA6	2.5038	204	202	0.0276348
KB-1572G7.3	2.46922	204	202	0.00310141
RN7SL834P	7.56401	204	202	0.000201376
LUCAT1	6.09579	203	203	0.00612198
ADAMTS7P3	14.0671	202	204	0.00859012
CSAD	734.061	203	203	3.61e-05
MTRNR2L10	3.20042	204	202	0.00454454
NADSYN1	4822.85	203	203	0.03715
CTD-2095E4.4	5.85038	202	204	0.0106415
SEMA4D	1684.94	204	202	0.00155268
NLRP6	9.25575	204	202	0.0352042
RP11-81H14.1	0.536586	204	202	0.0462817
RP11-192H23.8	36.2874	203	203	0.00593439
PRKG1	156.413	203	203	0.00095353
HSD17B7P2	95.862	204	202	0.0334246
EMC2	1567.23	203	203	0.0220014
SNRNP35	1109.24	203	203	0.0476344
CERCAM	3234.99	203	203	5.25e-05
POU3F1	73.098	202	204	0.0415299
TMX2	3697.62	202	204	0.00639421
SAFB	5629.74	202	204	0.0325746
OPN1SW	100.272	203	203	0.00709931
CTA-989H11.1	35.0832	202	204	0.0174919
RP11-296P7.4	1.14165	203	203	0.0146462
MT1P1	3.36279	203	203	0.00123755
RP11-403P17.6	39.1217	202	204	0.00183436
EID3	36.3031	203	203	0.048042
BNIP3L	3481.37	203	203	0.0172135
GSTT2	2.049	202	204	0.0399927
TAGLN3	4.30861	203	203	0.0289962
ETF1	4830.92	202	204	0.0474706
ANP32B	8382.9	203	203	0.0135461
ZNF540	41.3605	204	202	0.0145349
EPHA6	4.85721	203	203	0.0164335
LINC00460	3.41054	203	203	0.022121
ARSK	228.97	203	203	0.0490282
LRRC59	8156.99	204	202	0.00422369
CAPN2	8291.29	203	203	0.00047452
AC002398.11	5.01659	203	203	0.00208738
TUBG1P	1.25571	203	203	0.0313067
SLC26A1	114.288	203	203	0.00125753
EMC4	3456.01	203	203	0.0448489
BEND6	115.501	204	202	0.0124238
SPRR2E	1.86317	203	203	0.00894552
SLC24A3	236.494	203	203	0.00447976
KDELC2	1694.97	203	203	0.00228526
PAXIP1-AS2	141.812	204	202	0.0254441
FUNDC1	837.316	203	203	0.0492795
IL23A	114.854	203	203	0.015057
SNORA33	11.4202	203	203	0.0143853
AC091153.4	0.974807	202	204	0.0383593
REC8	413.606	204	202	0.0409561
ATIC	4135.23	204	202	0.0243743
MIR324	2.37512	203	203	0.0240703
PSD2	8.69591	203	203	0.00324868
GAMT	252.356	203	203	0.026915
THOC1	1406.7	203	203	0.00722725
ANLN	2440.29	203	203	0.00694402
CST1	130.692	203	203	0.0415513
SCRG1	7.27055	204	202	0.008687
LRRC2-AS1	0.655581	203	203	0.00286142
RP11-108O10.2	1.59669	204	202	0.0276609
MIR378A	1.24801	203	203	0.0277259
CTB-79E8.3	20.6856	204	202	0.0392515
FGFR1	1004.93	203	203	0.0160248
ARHGEF4	336.88	202	204	0.0409954
RNY4P10	9.92143	204	202	0.0387973
EIF5A2	212.308	204	202	0.031959
CFI	449.95	204	202	0.023941
FAR2	563.337	204	202	0.0295627
BVES	103.023	204	202	0.0308624
E2F5	428.704	204	202	0.0118668
GXYLT2	118.225	203	203	0.000578657
LIPC-AS1	2.44323	203	203	0.0109839
RP11-982M15.8	2.25676	202	204	0.0145081
EDNRB	268.505	204	202	0.00551561
RP11-521I2.3	17.9305	202	204	0.0209876
RP11-20B24.7	6.28507	204	202	0.000943967
KLHL29	400.763	202	204	0.0453243
LINC00501	0.697485	203	203	0.0283821
AF011889.5	32.398	203	203	0.0357314
AARS	6317.05	203	203	0.014064
TCEAL5	1.95725	203	203	0.00631561
SEL1L3	2307.22	204	202	0.00412439
GSDMB	1789.88	203	203	0.000201783
TECR	6092.46	202	204	0.0061126
CKMT2	21.8648	204	202	0.00927878
PAQR6	191.734	203	203	0.00327245
ELMO1	417.394	204	202	0.00159454
TCTE3	104.15	203	203	0.00171932
TRBJ2-1	2.09124	204	202	0.00824973
ZNF440	1396.22	203	203	0.0321381
RNF103	1346.65	202	204	0.00926121
KB-1208A12.3	213.986	202	204	0.000827412
TMEM164	1544.74	203	203	0.0395227
RP11-260M2.1	42.7304	203	203	0.00191541
KB-173C10.2	2.14242	204	202	0.00671558
ZNF224	471.693	203	203	0.000171871
HMGN4	2438.16	203	203	0.0467328
ZCWPW1	227.313	203	203	0.00329422
EMC1	3525.47	202	204	0.00151182
GLT8D2	272.368	203	203	0.0226507
RP11-411B10.2	4.89151	203	203	0.000595278
ZNF470	225.519	203	203	0.010212
PSORS1C3	23.8093	203	203	0.00266608
STXBP6	49.0607	204	202	0.0380077
NOMO1	2156.14	203	203	0.000322595
RP11-54H7.4	24.4458	203	203	0.00435154
AC016757.3	13.688	203	203	0.00327352
BTG2	9075.17	203	203	0.00806499
C11orf95	579.917	203	203	0.00900111
CCNL2	6962.72	202	204	0.048845
RTP4	498.098	203	203	0.0137624
E2F8	584.258	203	203	0.00500482
ZKSCAN1	3239.8	203	203	0.046816
MYLK	2137.53	203	203	0.00257876
UCN2	84.3804	203	203	0.0483613
TRAV36DV7	0.960166	204	202	0.0170084
RP11-420A6.2	1.30026	203	203	0.00714348
RNU6-762P	4.13906	203	203	0.00185248
RP11-3D23.1	0.868491	203	203	0.0357968
ANKRD13C	889.425	202	204	0.0272163
AJ271736.10	5.77363	203	203	0.000766207
SAMD14	77.1436	203	203	0.0333458
AC024060.1	2.59521	203	203	0.0146379
PARP8	1054.1	203	203	0.00847503
CTD-3092A11.2	122.755	203	203	0.0264452
UCP3	57.1094	203	203	0.000489701
APLP1	84.2744	203	203	0.000649819
LIX1L	901.255	203	203	0.00106205
C19orf25	1360.69	203	203	0.00143507
LARGE2	791.571	204	202	0.0222674
TNFRSF12A	2908.43	203	203	0.0266764
TFP1	6.62843	203	203	0.023334
RP11-415J8.3	62.5077	202	204	0.0383963
ZNF321P	186.251	203	203	0.00820536
HMMR	837.158	202	204	0.0267737
EVC2	131.259	203	203	0.0204692
RIOK2	819.923	202	204	0.00282851
RUNDC1	1218.9	203	203	0.0384011
RP11-326A19.3	1.11356	203	203	0.0276587
RP11-629O1.2	50.1974	203	203	0.0191798
SIGLEC15	152.552	203	203	0.0144913
BAG2	483.434	202	204	0.0212843
GAS6	2522.37	204	202	0.00323273
FAM73B	1449.28	203	203	0.0329064
RP11-849I19.2	0.564722	203	203	0.0110147
SPDYA	34.2604	202	204	0.000652307
PHF1	2239.9	203	203	0.0442821
NRSN2	1181.04	203	203	0.017542
CCDC82	1015.05	202	204	0.04551
FRMD3	118.888	204	202	0.0247593
ZNF43	830.124	204	202	0.0055018
ZIC2	84.159	203	203	0.0293903
UBE2L4	3.82894	202	204	0.00221472
RP11-394I13.2	17.1751	202	204	0.000931941
RNF26	2325.98	203	203	0.000296627
CST3	14076.7	204	202	0.0111533
ZNF181	295.421	203	203	0.00204843
CTD-2553L13.10	59.4116	203	203	0.0260575
EIF3J	2869.04	202	204	0.00654097
SIRPG	59.348	204	202	0.022967
LUC7L	1877.51	203	203	0.011745
DCTN5	3678.96	203	203	0.0270542
DCAF4L1	13.2284	203	203	0.00260941
ATAD3A	2011.36	202	204	0.0194345
SLC7A6	480.709	203	203	0.00208099
AC093702.1	1.16923	202	204	0.0276662
ZNF799	191.464	204	202	0.00391126
RP13-1016M1.2	3.90476	203	203	0.00880195
ASIC1	110.603	202	204	0.0343066
DAAM1	1666.46	203	203	0.0208422
RP11-155D18.13	15.6305	203	203	0.002522
RP11-496I2.5	4.52362	203	203	0.0484229
C1orf186	85.504	203	203	0.0302446
DOK7	173.495	202	204	0.000516627
PPP2R3B	1103.7	203	203	5.58e-05
MFAP5	126.861	203	203	0.0112075
KLHL5	821.041	203	203	0.0393923
HSPBAP1	494.023	204	202	0.0368064
CBLC	2724.34	203	203	0.00189296
RP11-428J1.5	67.1532	203	203	0.00352943
TRAPPC3L	1.53384	204	202	0.0129415
FER1L4	6194.73	203	203	0.000508509
RSRP1	2311.99	203	203	0.00447725
PDE4B	256.403	204	202	0.0264545
RASSF3	1337.79	203	203	0.00231913
OGN	15.0681	204	202	0.000553288
RP11-665C16.6	1.38203	203	203	0.00881488
HSPE1P8	0.603716	204	202	0.0121217
NSUN5P2	82.721	203	203	0.00106357
EIF5AP3	2.4039	203	203	0.00855979
GLTSCR1	1076.08	203	203	0.0469438
SERPINF1	2411.07	203	203	0.0127123
RP13-516M14.10	39.8959	203	203	0.0106505
NRDC	6786.63	203	203	0.0015661
ZNF512	1042.16	202	204	0.0185606
CTD-2196E14.5	1.97316	203	203	0.0167813
RP11-66N24.6	25.3033	203	203	0.0242987
ELOVL4	78.647	203	203	0.0111329
TUBE1	385.955	202	204	0.0114959
FCF1P2	178.407	204	202	0.0411384
RP11-159N11.4	23.2417	203	203	0.0209519
PCDHB8	28.0378	202	204	0.0154727
SVIL	3737.24	202	204	0.000396728
ARHGAP27	3659.45	204	202	0.000750109
NLN	1164.04	203	203	0.0063265
RP11-493L12.5	5.89279	204	202	0.00402352
MYO19	2418.83	202	204	0.01024
SETP17	2.33761	204	202	0.000896194
UBE2SP2	4.35709	203	203	0.0235995
LUC7L3	5372.26	203	203	0.0146848
H3F3C	14.6438	203	203	0.0226103
RP1-257I20.14	9.87009	203	203	0.0131983
RP11-50I19.2	21.4764	203	203	0.00436094
ZNF584	407.712	202	204	0.0425661
ZNF556	24.8424	202	204	0.0194317
PARD3	3008.14	202	204	0.00622951
EME2	641.781	203	203	0.00132569
COLGALT1	6818.82	203	203	0.00636068
PFKM	2208.27	202	204	0.0396993
TMPRSS11E	120.151	203	203	0.0378255
LINC01465	17.9351	202	204	0.000244645
HYAL3	210.09	203	203	0.000210001
2016-09-07	6544.36	203	203	0.00274849
AC005253.2	61.763	203	203	0.0444289
C1QL4	2.9936	202	204	0.0498273
ID2-AS1	10.4587	202	204	0.00884281
MIR99AHG	17.8386	204	202	0.00352577
CDH23	458.991	203	203	0.00830619
ESRP2	4395.66	204	202	0.0155655
DGCR14	1120.18	203	203	0.000199238
TREM2	250.064	204	202	0.0489108
RP11-946L16.1	0.758466	204	202	0.0449372
BBS9	560.96	203	203	0.00375702
LMCD1	894.61	203	203	0.0384956
C19orf18	29.9286	203	203	0.0273564
RN7SL574P	2.97745	203	203	0.0164942
LINC00612	4.20341	203	203	0.0294143
RP5-1042K10.13	3.52957	204	202	0.0293494
TGFBR1	1974.7	204	202	0.00414833
NUTM2A-AS1	443.677	203	203	0.0391746
RP11-1114A5.4	57.8964	203	203	0.000851846
MECOM	3287.55	203	203	0.0117825
SNAP25-AS1	1.30586	203	203	0.0231752
FLCN	1082.78	203	203	0.0300904
RP11-131L23.1	7.66236	204	202	0.0207248
CDKN3	539.694	203	203	0.0317997
POLB	1311.34	202	204	0.000767532
NOV	104.55	203	203	0.0449323
ZNF577	303.677	204	202	0.00657211
ZNF682	276.558	203	203	0.00623186
GNG12	3694.36	202	204	0.0141351
RP11-677M14.2	8.79023	203	203	0.00485313
SNX29	960.181	204	202	0.00165692
AK2	5537.47	203	203	0.0170415
FAM111A	2060.18	202	204	0.00525456
COL8A1	1148.69	203	203	0.0299795
PHF11	1407.45	204	202	0.00731039
RP11-303G3.6	3.07115	204	202	0.00894281
CTD-2165H16.4	28.2883	203	203	0.00496645
CASP9	913.072	203	203	0.00109139
SYT2	23.4299	204	202	0.0412972
ZNF3	1512.77	202	204	0.0151355
ZNF789	436.25	202	204	0.00590519
SIDT1-AS1	0.87137	204	202	0.0101334
PTTG2	2.8541	203	203	0.000497034
EHMT2-AS1	2.52257	203	203	6.83e-06
LMNB2	5885.17	203	203	0.0372522
RP11-641J8.1	3.21388	202	204	0.0260661
CTD-2619J13.3	11.637	203	203	0.0391909
SND1	9785.79	204	202	0.0339195
KB-1615E4.2	4.68389	203	203	0.00760718
TAPT1	805.419	202	204	0.00935167
IRX6	1.44525	204	202	0.0409237
C17orf82	61.8103	203	203	0.00598418
RP4-751H13.7	3.31108	204	202	0.0364409
RP11-455I9.1	7.57308	204	202	0.00271623
MIR7111	6.28035	204	202	0.00411623
RP11-1016B18.1	1.37829	203	203	0.019974
SYCE2	32.752	204	202	0.000311498
HKR1	1627.42	203	203	0.00881607
TRPM2	884.074	203	203	0.0136722
RP11-247A12.7	4.83596	203	203	0.0201585
ATL3	3440.49	202	204	0.0165104
CDK6	897.968	203	203	0.0137253
C17orf62	4114.13	204	202	0.0335917
DLEU1	228.103	202	204	0.0461535
AC010524.4	0.948765	204	202	0.0406369
C5orf56	166.085	204	202	0.00475881
PPP1R37	4179.93	203	203	0.000875473
SLC35B3	1088.07	204	202	0.0464048
CTD-2199O4.6	4.82855	203	203	0.000351104
INPP5J	160.64	203	203	0.0193623
AC007405.8	0.799974	203	203	0.0231811
ANKS3	804.019	203	203	0.022586
RP11-139I14.2	1.74424	203	203	0.00173369
AC007182.6	0.918131	203	203	0.0104761
THRB-AS1	16.563	204	202	0.0428309
RP11-490H24.5	4.54917	203	203	0.0413599
PCDHGA2	30.2878	203	203	0.0039865
FAM209B	8.19334	203	203	0.00169094
KLHL20	671.087	203	203	0.0181915
AGBL3	75.7296	203	203	0.00121593
KRT18P3	1.58642	204	202	0.00517722
TRIM31	222.864	203	203	0.0194331
AGAP2-AS1	372.863	202	204	0.0450191
SPINK1	1881.33	204	202	0.0283143
CPEB2	469.396	203	203	0.0164332
AC015849.13	1.25571	203	203	0.00362641
RP11-456K23.1	20.4477	203	203	0.017899
AK7	20.729	203	203	0.0310554
LINC01099	0.920906	203	203	0.0490099
RP5-966M1.5	0.777937	203	203	0.00744767
PCDH7	608.601	203	203	0.0236345
ARF6	8803.27	203	203	0.015851
CXCL12	545.596	203	203	0.0177865
RP11-122K13.12	31.9278	203	203	0.0301724
CATSPER4	1.58766	203	203	0.000938172
EPHB1	33.6351	203	203	0.000866833
RP11-580I16.2	16.4376	203	203	0.026085
GTPBP10	867.106	202	204	0.0311833
RP5-908M14.9	96.154	203	203	0.0107855
XXbac-B476C20.11	0.852871	203	203	0.0112428
MIR573	3.25831	204	202	0.00183983
RP1-47M23.3	2.43055	204	202	0.0499639
TAS2R20	12.561	202	204	0.0488641
COMP	391.811	203	203	0.00548082
NOP10	3476.39	203	203	0.0128179
CTC-203F4.2	23.4593	204	202	0.028589
PRRX1	679.842	203	203	0.0153621
WDR7	688.941	204	202	0.0493367
SUPT20H	2108.1	203	203	0.00154288
RP11-666O2.2	19.8853	203	203	0.00014766
RP11-168L22.2	1.29834	203	203	0.025194
FHAD1	121.164	203	203	0.00725085
HAUS2	953.406	203	203	0.00436188
OCM	1.97933	204	202	0.0365611
RP11-474P2.7	1.50267	204	202	0.00403546
CCRL2	158.731	204	202	0.00394675
RP11-752G15.10	4.99378	203	203	0.000296519
PTPRZ1	12.9925	204	202	0.0368662
ZNF518B	885.404	202	204	0.0373587
PSMC1	804.013	202	204	0.00527811
UGT2B15	6.42154	203	203	0.000380917
GHRLOS	19.3616	203	203	0.0145892
P2RY11	308.609	203	203	0.0147033
AP000662.4	7.99279	203	203	0.0493536
NSMCE4A	1360.43	202	204	0.0127967
AC079466.1	0.569999	203	203	0.00223938
AC006042.6	42.7795	202	204	0.00294897
RP11-1020A11.2	91.283	202	204	0.00555789
GALM	1322.44	204	202	0.0234193
ARSB	537.394	203	203	0.0138933
DPP9-AS1	14.7916	203	203	0.0028884
RPN2	20935.2	204	202	0.000449416
CTD-2529O21.1	0.976173	202	204	0.0409216
CLTC	19491.3	204	202	0.0170342
RP4-697K14.15	5.1605	203	203	0.0112779
LRFN5	17.7203	204	202	0.0190719
PRR11	1125.96	203	203	0.0180942
INSL3	18.8444	203	203	0.000427769
PEAK1	1181.34	203	203	0.0456619
CTD-2061E19.1	1.59853	204	202	0.0283514
ELOVL5	2859.05	204	202	0.0307638
PGR	25.7509	203	203	0.0161169
RP11-127B20.2	22.9684	204	202	0.0319531
ETNK1	2124.06	202	204	0.0119534
LINC01473	19.2278	202	204	0.0247683
RP11-436D10.3	1.27888	203	203	0.0499057
LY75	820.181	203	203	0.0225953
KDELC1	317.045	203	203	0.0405619
IRAK3	237.413	203	203	0.0438692
GOSR2	850.157	204	202	0.0209996
TRIB3	1195.23	203	203	0.040366
ADAM23	102.448	204	202	0.00251551
EGFR	4563.42	203	203	9.65e-05
STX18	1270.6	203	203	0.04315
NDUFS3	2923.49	203	203	0.0344817
ZFP14	438.955	202	204	0.00815647
CTD-3128G10.6	36.6993	202	204	0.00623128
FAM117B	861.975	203	203	0.00181606
CTD-2373N4.3	30.9597	204	202	0.00447414
UBQLNL	17.8463	204	202	0.00864899
RP11-332H18.7	3.49308	203	203	0.00244158
MSMB	17.0948	203	203	0.0265661
RP11-231C14.4	5.21265	203	203	0.0052935
MRPS27	2429.71	203	203	0.02575
THUMPD2	640.309	202	204	0.0284802
AL109761.5	2.56523	204	202	0.0429902
SNORD124	1.83093	202	204	0.0257866
FMNL3	1186.79	203	203	0.00819776
LRP1	9340.23	203	203	0.00013592
AC068196.1	2.51587	204	202	0.013474
AP000281.1	1.26801	204	202	0.0425911
TCF7L2	1174.91	203	203	0.0402875
RP11-379F4.6	16.4325	202	204	0.00347875
CNOT8	2439.25	202	204	0.032061
AHNAK2	1005.98	202	204	0.00307247
RP11-210M15.2	11.7605	203	203	0.00731697
AP000354.2	3.65178	203	203	0.00925855
FOXA1	3435.57	203	203	0.000614668
NRP2	1233.56	203	203	0.00222774
FABP6	272.986	202	204	0.043798
LGALS9	3036.67	204	202	0.0208364
RNU6-322P	4.10907	204	202	0.0284067
KRTAP5-8	4.831	202	204	0.00998653
RP11-686D22.4	29.4408	203	203	0.00430716
RP11-795F19.5	14.7639	203	203	0.0299881
C3orf36	20.0168	204	202	0.013343
RP11-306G20.1	1.40028	203	203	0.0345708
OGDH	5909.96	204	202	0.00999767
SNORD19	5.29638	203	203	0.000234719
MIR4685	0.853518	203	203	0.00618701
LHFP	783.131	203	203	0.00256058
RP11-365O16.6	10.0972	204	202	0.0234631
PTGS1	643.207	204	202	0.0434019
ZNF674	128.4	202	204	0.00605587
RP11-305L7.1	6.35975	203	203	0.0225141
RP11-259O2.1	1.33684	202	204	0.00259325
RP11-196G11.2	8.81663	203	203	0.00289555
SOBP	105.006	204	202	0.0465513
ADAMTS15	116.794	203	203	0.00264138
HECTD1	4940.28	203	203	0.00884542
XPC	1693.64	204	202	0.00682581
RAB6B	204.732	203	203	0.0474632
FAM101B	589.285	203	203	0.0216421
CTD-3162L10.5	1.1622	202	204	0.0428472
RP11-97C16.1	100.637	204	202	0.00170768
LRRC4C	8.06261	204	202	0.0239952
AC013461.1	1644.87	202	204	0.0193803
RP11-165F24.3	8.19259	204	202	0.0175846
RP11-59D5__B.2	1.49158	203	203	0.00158468
ARCN1	7333.88	203	203	0.000813104
TFAP2B	2.33696	203	203	0.029743
TENM4	318.143	203	203	0.0237478
RP11-89H19.1	0.641369	204	202	0.000398567
IQSEC2	1028.72	203	203	0.0304656
PLCG1-AS1	7.38001	203	203	0.0273054
ANXA6	2717.44	204	202	0.0182359
RP11-258F22.1	7.58244	204	202	0.00351006
RP11-972P1.10	10.0317	202	204	0.0202486
MTHFD1L	1401.29	203	203	0.00444112
TUB	133.497	202	204	0.0266347
ADCY9	727.591	203	203	0.0287086
RP11-434H6.7	33.0683	204	202	0.0213828
PPP2R3A	626.04	203	203	0.000432703
PCMTD1	2777.57	204	202	0.0488249
EHD4-AS1	6.21503	203	203	0.001814
RP11-281P23.1	8.9689	202	204	0.0370762
PCDHGC4	3.76997	202	204	0.0269415
ZBTB8B	68.3458	203	203	0.0389437
HOXC8	23.3648	202	204	0.0457678
ALDH1A2	268.905	203	203	0.0224427
C17orf51	146.54	203	203	0.0376555
RP11-96C23.13	18.3424	203	203	0.00460082
SERPINB10	0.84866	202	204	8.96e-05
LINC00930	28.7213	203	203	0.00384918
MLIP	4.07605	203	203	0.0193063
DGKI	45.7466	204	202	0.00519026
EXTL3-AS1	18.6635	202	204	0.0191716
PPP2CB	2647.15	202	204	0.00788489
VEGFA	9022.61	204	202	0.004254
CYFIP1	6041.4	203	203	0.0152796
TMLHE-AS1	2.09497	202	204	0.015157
IPO7	5435.91	203	203	0.00282017
BCAT1	930.419	204	202	0.0461134
CTD-2510F5.4	108.773	203	203	0.0486529
MYH11	2248.83	204	202	0.0379056
EIF3A	9532.39	203	203	0.0248563
UNC5CL	64.0858	202	204	0.00237234
RSU1	3052.75	203	203	0.0459255
DZANK1	182.789	203	203	0.0211223
GPR35	85.7256	204	202	0.00920221
RAB11FIP5	1527.32	203	203	0.015212
RP11-274B21.10	22.419	204	202	0.00171755
CTGF	3527.86	203	203	0.0274526
ARHGAP29	974.68	203	203	0.0395147
RP3-406P24.5	26.9645	204	202	0.000216499
FAM129A	1443.02	203	203	0.00853498
GK	340.47	203	203	0.0371422
ZNF630	149.207	202	204	0.000231086
AC011294.3	7.95619	203	203	0.0147222
CTD-2574D22.4	124.429	203	203	0.0137837
AC092620.3	1.57624	203	203	0.0232281
PRR13	3835.95	203	203	0.0456614
RP4-598P13.1	1.0233	203	203	0.00403107
NUDT16P1	357.338	204	202	0.00237511
RP11-9E13.4	1.054	204	202	0.0239645
RP11-188P20.3	13.4245	203	203	0.000777292
RP11-422P24.10	24.9239	203	203	0.0170087
CTD-2021H9.3	44.7178	203	203	0.0210388
RDH13	1149	202	204	0.0159927
ZSCAN26	440.325	202	204	0.000292844
HDAC7	5426.16	203	203	0.00343522
CASC18	2.31494	202	204	0.00814215
GANAB	20075.3	202	204	0.00135885
NFATC1	379.331	203	203	0.0181394
CLK2	2481.19	203	203	0.00814895
EHD2	4452.37	203	203	0.0369086
GBAP1	139.104	203	203	0.0293054
AF131215.9	69.5337	203	203	0.0223787
SLC45A3	530.975	203	203	0.0159515
ZFHX4-AS1	3.52568	203	203	0.00816337
S1PR1	426.039	204	202	0.0010456
RP11-574K11.32	44.9248	203	203	0.00960508
RP11-459F6.3	7.62327	203	203	0.0118805
RP11-407G23.2	5.30814	203	203	0.0468984
NR2C1	875.128	202	204	0.000403178
ZNF100	406.047	203	203	0.00396618
CNTNAP3B	13.891	203	203	0.00355577
RP1-182O16.1	1.12253	203	203	0.0272085
SLC25A15	196.546	202	204	0.005538
SH3PXD2B	2108.68	203	203	0.00203054
AC006160.5	4.13447	203	203	5.03e-05
C16orf62	2008.99	204	202	0.0480761
CTD-2639E6.9	17.2994	204	202	0.0031711
PLEKHF1	1135.71	203	203	0.00859689
PODNL1	190.849	203	203	0.00326981
MAP3K14-AS1	108.705	203	203	0.000764203
CTU1	226.893	203	203	0.0286805
RELL1	112.754	203	203	0.00764683
KDM3A	2529.07	202	204	0.0338591
RAMP1	243.869	203	203	0.0347587
GS1-124K5.13	1.08335	202	204	0.0321338
DDX10	1354.67	202	204	0.0155558
HCP5B	3.87135	203	203	0.026351
RP11-188C12.2	19.21	203	203	0.00896696
AC012074.2	9.77746	203	203	0.0116976
ARMC4	6.57612	203	203	0.0274252
KCNK5	518.485	204	202	0.00244169
COPRS	1643	202	204	0.0139982
CNTNAP2	7.60039	203	203	0.0133037
NOVA1	24.5128	204	202	0.0366068
SCNN1G	746.28	204	202	0.0164791
UACA	1665.75	203	203	0.0030401
LINC01198	0.875673	203	203	0.00929577
CREB3L1	920.976	203	203	0.0250549
MTND4P26	0.879647	202	204	0.0178672
SPOCD1	493.084	202	204	0.00139678
PCDHGA3	9.0317	203	203	0.00178261
AC007204.2	2.66188	204	202	0.0389672
RP11-563N4.1	12.0643	202	204	0.020708
RP4-569M23.4	0.957089	203	203	0.0256794
CTD-2024P10.2	5.25721	202	204	0.0417807
IFT122	1007.31	204	202	0.0362677
CISD1	868.691	202	204	0.0119002
FMO8P	0.531087	204	202	0.0280874
RP11-333E13.2	3.42623	202	204	0.00289404
HLA-E	29414.5	204	202	0.00540248
EYA3	1372.92	204	202	0.0478031
QPCT	659.034	203	203	0.0195297
SLTM	4587.56	202	204	0.018102
AC005954.3	1.57997	203	203	0.000148058
S100A6	89601.7	203	203	0.0219026
NGDN	1439.84	202	204	0.0484471
RP11-285E9.5	3.99117	203	203	0.000987032
ITIH2	7.79132	203	203	0.000858075
RP11-357N13.6	0.933689	203	203	0.0233318
RP11-84A12.1	1.0791	204	202	0.0180001
AVPR1A	103.046	203	203	0.0148098
ANKRD1	5.28619	203	203	0.0287199
RP11-380O24.1	11.3325	203	203	0.0125915
PNMAL1	48.7779	203	203	0.0270993
PLXNA4	30.8098	203	203	0.0316989
PCDHGA9	21.7392	203	203	0.0220898
CCDC184	41.4206	203	203	0.032153
ASTL	6.91663	204	202	0.0156847
HIST1H4D	6.83433	202	204	0.0244567
RP11-219B4.7	3.05561	203	203	0.00835621
SHE	110.417	204	202	0.04422
AF131215.2	43.9233	203	203	0.00813489
CAPN10	922.932	204	202	0.0335333
FBXO22	1374.03	203	203	0.0225742
RP11-594N15.3	23.3167	202	204	0.00738777
RUSC1-AS1	236.484	203	203	0.00419924
LAMA2	470.402	203	203	6.69e-05
ISLR2	24.9905	203	203	0.0327646
KCTD9	837.184	203	203	0.00308987
CTB-129P6.4	5.70587	203	203	0.00765145
RP11-727A23.4	13.4355	203	203	0.00136464
MTCL1	1103.09	203	203	0.0379092
TH2LCRR	5.09589	204	202	0.015256
RP11-75L1.1	0.800372	204	202	0.0440702
LINC00571	5.79505	203	203	0.0322225
LCN12	25.087	204	202	0.0297648
NIT2	2774.41	203	203	0.0215826
FAF1	2667.02	202	204	0.0132397
RP11-239L20.6	1.68255	202	204	0.00076703
AADAT	379.402	203	203	0.0358278
SLC25A14	409.943	203	203	0.000485367
CYP4B1	3380.38	203	203	0.0337727
SLC9A3R1	3182.09	203	203	0.0135899
RP11-113K21.4	3.52656	203	203	1.02e-05
CTC-559E9.8	29.2456	202	204	0.0172154
SSFA2	3056.4	203	203	0.00158003
SFTPA2	4.89801	204	202	0.0495016
RP11-146F11.5	6.27888	202	204	0.0287338
CSE1L	6708.22	202	204	0.0119889
ZNF674-AS1	138.819	202	204	0.0125184
CYP3A7	17.7352	203	203	0.0298914
STK24-AS1	24.4387	204	202	0.0261333
GATAD1	2005.37	204	202	0.024761
RP11-145A3.1	6.72165	203	203	0.0208855
PAN3-AS1	42.5534	202	204	0.0421079
SLC2A8	1236.56	203	203	0.000396835
NAPEPLD	700.475	202	204	0.037304
RP11-517C16.2	38.5729	203	203	0.0223226
MAP7D3	375.611	203	203	0.00196896
SF3A3P1	1.17514	203	203	0.0142189
TRAK1	7020.33	204	202	0.00709383
AC016912.3	1.08815	204	202	0.0153657
AP000640.10	8.83905	202	204	0.021679
CACTIN	1270.53	203	203	0.0219991
GDA	58.7747	203	203	0.0123394
CH17-431G21.1	30.8351	202	204	0.0153489
ADGRF3	45.4299	203	203	0.000863178
ZNF350	468.092	204	202	0.000615325
CLDN15	365.84	204	202	0.000913913
MYO5A	1180.08	203	203	0.0413376
ECHDC2	2440.3	203	203	0.00794207
ZHX3	919.074	202	204	1.21e-05
PTGES3	13843.7	202	204	0.042983
RPL21P44	1.9978	203	203	0.0461314
LRTM1	0.79695	203	203	0.0261908
RNF216	2294.84	202	204	0.0173143
LENG8	6000.84	203	203	0.0126015
AC007292.6	30.7404	202	204	0.00360058
RP5-1033H22.2	19.7842	203	203	0.0384414
TNFSF9	57.6748	203	203	0.039659
ETV7	581.258	203	203	0.000169658
LA16c-358B7.4	5.63478	203	203	0.0048921
ASB16-AS1	502.222	203	203	0.00263414
MIR3685	12.5792	202	204	0.00122664
LTBP1	3394.75	203	203	0.00542971
RP11-344B2.3	0.836276	203	203	0.0363344
UTAT33	8.55062	204	202	0.00225757
ADAMTS9-AS1	8.39819	204	202	0.000527992
RS1	3.6748	203	203	0.00571731
ZNF812P	189.695	202	204	0.0026298
GPAT3	78.4959	203	203	0.00750919
PYGL	5832.77	202	204	0.000997949
SNORA2	3.72468	203	203	0.0312188
RP11-468E2.5	19.5267	203	203	0.000943264
PTGER3	51.3995	203	203	0.001214
DPH2	1406.68	203	203	0.0379035
RP11-706O15.1	321.606	202	204	0.000456926
CTD-2521M24.13	3.12546	202	204	0.03018
MEF2A	1448.5	203	203	0.00142941
CTD-2047H16.3	4.04106	202	204	0.0440834
GAP43	12.6044	204	202	0.0174651
LINC01277	8.25979	203	203	0.040537
RBP1	463.127	204	202	0.0450746
FASLG	12.9783	204	202	0.0216054
NABP1	998.165	203	203	0.0425853
RP11-92F20.1	1.79014	203	203	0.000343799
FXN	388.007	204	202	0.0147632
FRY-AS1	3.47268	202	204	0.0108077
LINC01605	44.1072	203	203	0.0184431
ZGRF1	302.497	203	203	0.0015493
HIST1H4C	3.87494	203	203	0.0101683
CTBP1-AS	54.0693	203	203	0.0131144
RP11-80P20.3	13.3152	203	203	0.0488489
RP11-106M3.3	56.2723	203	203	0.0163293
ZNF862	560.724	204	202	0.00762493
TRMT112P6	4.98698	203	203	0.0392954
RP11-261P9.4	15.585	203	203	0.00511039
CTD-2062F14.2	0.697838	203	203	0.030806
RP11-508N22.12	13.1257	203	203	0.0143228
SPAG8	35.715	202	204	0.0150473
EVC	389.409	203	203	0.0113353
RP3-465N24.6	7.42386	203	203	0.0118986
RP11-475D10.4	4.26059	203	203	0.039151
TMPRSS6	19.6326	203	203	0.000615945
POLR3G	114.56	202	204	0.000334841
MIR9-3HG	53.3422	203	203	0.0304749
RP6-109B7.4	7.38922	202	204	0.018649
OLFM4	36.0651	203	203	0.0392513
ST3GAL1	3388.79	203	203	0.0373843
CTD-2550O8.7	1.60364	203	203	0.00350266
CTD-2528L19.3	2.36702	202	204	0.0070054
RP4-761J14.8	7.139	203	203	0.0025076
ZNF414	546.624	202	204	0.0467777
RP11-247I13.11	9.04789	203	203	0.0360239
RP5-919F19.5	1.05962	203	203	0.000936521
TBC1D3E	0.961531	203	203	0.00313735
RP5-827C21.6	7.11041	202	204	0.00931282
CCDC30	95.6705	203	203	0.00669381
CLEC3B	66.9866	204	202	0.0492515
ABCF1	5140.78	202	204	0.0439943
SPATA1	21.9314	203	203	0.0107071
RP3-512B11.3	62.6423	202	204	0.0086244
AC006378.2	10.4213	204	202	0.00317032
TGFBI	5074.22	203	203	0.0135921
RP13-46H24.1	1.15986	203	203	0.00723568
HEG1	1791.02	203	203	0.0457981
RP4-710M16.2	7.00129	204	202	0.000257901
TMEM147-AS1	435.149	203	203	0.00380299
RP11-468O2.1	0.894123	204	202	0.00461753
HGFAC	6.6329	202	204	0.00953098
PALLD	4888.14	203	203	0.0019299
RP13-923O23.6	0.658755	203	203	0.0181189
CGB3	1.1672	203	203	0.0326741
G2E3	764.747	203	203	0.0234692
RP11-89N17.1	0.980237	203	203	0.00696898
DDX12P	183.55	203	203	0.0303703
EIF5B	6907.59	203	203	0.0385109
KIF25	3.15985	203	203	0.00321033
ASS1P10	1.69203	203	203	0.00704197
RP11-923I11.6	13.5546	204	202	0.0406675
RP11-626H12.1	1.1893	203	203	0.0271854
BCL9L	2053.11	203	203	0.038855
AC012307.2	0.794185	204	202	0.00217417
RAB22A	2859.67	202	204	0.032685
AC006077.3	18.7188	203	203	0.00359076
SLC25A10	1199.94	203	203	0.0384186
CLUHP3	566.574	204	202	0.0311057
NPM1	19678	202	204	0.00677787
AGAP9	142.337	203	203	0.0430115
PTK7	5743.57	202	204	0.0162728
RP11-696L21.2	0.964897	202	204	0.00274194
FGFRL1	688.566	203	203	0.0258673
PLEKHG7	16.9776	203	203	0.0123963
GHRL	17.8686	204	202	0.00266239
C8orf88	21.5746	203	203	0.00751916
SPAG1	722.73	203	203	0.0277409
FANCC	555.382	203	203	0.0389217
HDLBP	22596.7	204	202	0.00953041
RP11-889L3.4	14.0272	204	202	0.0243591
C9orf64	628.817	204	202	0.015007
SULT1C2	31.7839	204	202	0.00168302
CCDC102B	142.464	203	203	0.0221493
LDLR	2450.22	203	203	0.000946357
RP11-370B6.1	1.34569	203	203	0.0130627
NALCN	24.9223	203	203	0.0238745
AC009303.2	31.3008	203	203	0.046365
SBK1	460.631	203	203	0.0482125
RP11-5C23.2	17.7697	204	202	0.0042653
RP11-295D4.4	6.31598	203	203	0.000346329
ZNF160	1259.24	204	202	0.00464268
CTB-134H23.2	1.48395	202	204	0.000192143
CTD-2002H8.2	22.3036	203	203	0.0182407
KIAA0196	2290.12	203	203	0.0077638
PTK2B	1637.75	203	203	0.0258082
STK36	915.533	203	203	0.0222223
ZDHHC6	1837.89	203	203	0.0314678
IL20RA	1022.22	203	203	0.0219714
MIPEP	799.817	203	203	0.0111428
ZXDB	510.132	203	203	0.015291
PLCXD2	108.989	202	204	0.0131318
RP11-266K4.9	18.4845	203	203	0.0281341
PCDH18	252.009	203	203	0.0146119
LRRC37B	318.157	203	203	0.00957048
LARGE-AS1	0.573245	202	204	0.0423037
TBX1	608.052	203	203	0.010832
FASTKD3	437.29	203	203	0.0226931
AC015922.7	0.790006	203	203	0.0241921
RP11-430C7.4	0.774473	204	202	0.0122554
ST7	1116.68	203	203	0.0275506
ACMSD	2.86803	204	202	0.000437848
LINC01481	50.0502	202	204	0.00450904
DPY19L1P2	8.51704	202	204	0.0242079
DUSP28	157.043	203	203	0.00551941
RP11-57H14.2	8.24524	202	204	0.00249449
SMPDL3B	283.597	203	203	0.0372546
RP11-696N14.1	195.024	203	203	0.0107607
FHL5	19.275	204	202	0.0120184
LMBR1L	1813.24	203	203	0.0272362
POLR3D	1108.29	202	204	0.0188679
CTD-2026K11.5	4.30576	202	204	0.0179762
REXO2	2296.58	203	203	0.00603909
NADK2	1621.53	203	203	0.0419145
SLC9B2	195.835	203	203	0.00339314
RP11-386M24.9	2.48097	203	203	0.0403514
CCSER2	1556.74	203	203	0.0357806
RP11-677I18.3	7.93072	202	204	0.033426
FERMT2	989.122	203	203	0.00303432
RP11-295I5.4	1.52981	202	204	0.0244119
SLC7A9	15.267	203	203	0.00158416
GLI4	732.005	203	203	0.0119723
RP11-271K11.5	3.91075	203	203	0.0460277
CAPN7	1337.27	204	202	0.00338481
AC005519.4	23.0235	203	203	0.00707013
SGCD	109.126	203	203	0.0105941
GJD3	2.33949	203	203	0.0177673
SGK2	87.3431	204	202	0.00461568
AC007191.4	69.7334	204	202	0.0308377
FBXW9	687.916	203	203	0.0379648
RP11-424M24.3	2.82185	203	203	0.0360067
SCG2	32.3514	203	203	0.0145933
RP11-370I10.12	4.67714	203	203	0.0287345
SET	15961	204	202	0.0402223
DNAJC1	1561.56	202	204	0.00968659
RP5-1165K10.2	15.6894	202	204	0.00935367
CTD-2547L24.3	21.6053	204	202	0.0452962
RP11-173B14.4	9.21016	202	204	0.000443255
ID2	1412.8	204	202	0.00907624
AC024937.4	5.28958	203	203	0.00721253
RASSF10	137.376	202	204	0.0266005
ACY1	292.781	203	203	0.00362535
RP11-576N17.5	0.858946	203	203	0.00781874
USP13	535.876	203	203	0.00608886
MFSD14A	2232.16	203	203	0.0125894
TPPP3	366.423	203	203	0.0198342
RP3-412A9.16	23.9967	202	204	0.0315647
CHPF	6447.89	204	202	0.00843039
RP11-51J9.5	41.1105	203	203	0.0152782
AP3S1	2200.28	203	203	0.0182028
LSM11	367.325	203	203	0.0139705
DKK3	1496.32	203	203	0.0167516
KIF1B	2099.97	202	204	0.00149917
ZNF532	1570.29	203	203	0.0143024
TRIM38	2152.56	204	202	2.44e-05
PPIAP3	6.29689	203	203	0.0359931
RP11-674N23.4	4.42663	203	203	0.00819956
KDELR3	940.554	203	203	0.0365638
RP11-803D5.1	6.3894	203	203	0.0233043
LINC00222	3.28067	203	203	0.00964559
RBMS3	185.959	203	203	0.000544237
SLC25A5-AS1	54.6754	203	203	0.00967782
FBP1	2866.86	203	203	0.00429618
ROBO2	42.8442	202	204	0.0499051
ZNF524	894.183	203	203	0.0058465
LRRC37BP1	319.997	202	204	0.0361615
STAG3L5P	203.516	203	203	0.000281529
RP11-121A14.2	3.00248	203	203	0.0250727
CTD-3074O7.5	133.259	203	203	0.0201877
P3H4	1626.76	203	203	0.00163784
RP5-854E16.2	2.24098	204	202	0.00113452
NFIA	1197.29	202	204	0.00191317
RP11-795F19.1	29.6771	203	203	0.0489187
RP11-887P2.3	4.26941	203	203	0.0225499
CTB-50L17.14	12.1155	204	202	0.01694
C6orf120	860.888	204	202	0.00570503
PLOD1	7797.42	203	203	6.49e-05
MORF4L1P1	253.474	203	203	0.00345927
TRIM31-AS1	10.1788	203	203	0.0182539
B4GALT2	3599.34	202	204	0.00277568
TLE6	131.969	204	202	0.0187836
ABCF2	3198.96	203	203	0.00556138
RPL32P3	259.161	203	203	0.0117715
TRIM26	3840.15	203	203	0.000490163
PRPF19	7389.44	202	204	0.000673513
RNU1-103P	2.91235	202	204	0.00562999
WASH2P	169.048	203	203	0.00746579
HMGA1	14634.1	202	204	0.0404347
CTC-559E9.6	54.8873	202	204	0.0494488
AC073316.2	2.3685	204	202	0.00937709
ITGB7	111.79	204	202	0.00782745
ITPR1-AS1	12.018	204	202	0.00436107
PCDHGB6	44.4433	203	203	0.0114914
ZNF165	365.057	203	203	0.00560757
PRICKLE3	985.906	202	204	0.00813404
NLE1	1139.97	203	203	0.0247165
RP11-120K24.4	5.67019	204	202	0.0153736
SERTAD3	1695.07	203	203	0.016309
RP4-751H13.5	23.3381	204	202	0.0263034
ANKRD29	48.253	203	203	0.0151973
RP11-96D1.6	12.9077	203	203	0.00445473
MKX	18.1696	203	203	0.0440733
TMIGD2	26.3881	204	202	0.0145914
MRPL1	962.147	203	203	0.0076391
RP1-142L7.5	2.38791	203	203	8.35e-05
RP11-867G23.10	6.32362	204	202	0.01118
ALG1L2	20.3541	204	202	0.0499911
RP1-128M12.3	0.838625	203	203	0.0185588
RNU5B-2P	10.2386	204	202	0.000128885
DCAF8	2790.82	204	202	0.0146504
RP11-322E11.2	61.6788	203	203	0.0193345
JMJD7-PLA2G4B	256.306	203	203	0.0103978
CACNB3	2035.39	202	204	0.00761711
RAB40A	38.2985	203	203	0.00647605
RP5-855D21.2	9.62819	203	203	0.00188772
RP11-640L9.2	12.8144	204	202	0.0058989
LIME1	178.878	203	203	0.00934888
DYNLRB2	10.5314	203	203	0.00148473
SKAP1	277.073	204	202	0.000777395
SUPT6H	6867.68	203	203	0.00179101
RP5-890E16.2	29.2389	203	203	0.0014
CASP7	1609.33	203	203	0.0454811
RP11-331F9.4	1.2138	203	203	0.0457512
ASAH1	7257.11	203	203	0.0424061
LINC01451	85.2762	203	203	0.0458412
RP11-61E11.2	1.27223	203	203	0.0482431
N4BP2L1	457.719	203	203	0.0108967
TTLL9	10.3413	203	203	0.0257654
YKT6	5396.28	202	204	0.014733
CTPS2	1225.5	203	203	0.00610257
RP11-973H7.3	50.1975	203	203	0.0476057
ADAMTS12	424.243	203	203	0.000928418
ADAMTS9-AS2	5.65319	203	203	0.00276954
RP1-149A16.3	4.08568	203	203	0.00337074
UGT1A4	0.861404	203	203	0.0304599
RP11-112J3.16	22.6477	202	204	0.000348481
RP11-676J12.4	12.2507	202	204	0.00117986
OGT	5500.2	204	202	0.00167935
RP5-890O3.9	130.553	202	204	0.0247114
ZNF77	198.574	202	204	0.00921133
BVES-AS1	3.47385	203	203	0.0417602
PRND	6.75033	203	203	0.0306576
HOXB7	1255.91	203	203	0.0235147
LEFTY2	2.63087	203	203	0.00170211
RBM39	9647.45	203	203	0.0438567
RP13-143G15.4	2.93638	202	204	0.0353864
SLC1A4	1073.43	204	202	0.0198862
RP11-430G17.3	3.4767	203	203	0.0499805
LYG1	42.8969	202	204	0.0164166
MOGAT2	24.4595	203	203	0.0184757
RNU2-22P	1.05338	203	203	0.0261472
XXbac-BPG252P9.9	16.294	203	203	0.00549557
ASNSP3	0.793536	203	203	0.0214171
DDX50	1850.04	202	204	0.0326398
IPO13	2143.85	203	203	0.0376871
HSCB	509.591	202	204	0.0258078
ANXA1	11859.4	203	203	2.28e-06
SYT9	4.272	202	204	0.0189781
HOXA11-AS1_4	0.676387	202	204	0.0419485
TMEM213	1.62477	203	203	0.0320504
SEC31B	202.413	204	202	0.00439212
B4GALNT1	90.0513	203	203	0.0090494
WDR87	0.70031	202	204	0.0428446
OSER1-AS1	423.294	203	203	0.0227486
CTIF	1411.69	204	202	0.0346334
STAC3	197.818	204	202	0.015621
JAM3	527.499	203	203	0.00172543
PDE6C	13.9844	203	203	0.0139747
CTD-2171N6.1	5.2423	203	203	0.0492618
RP5-867C24.1	2.3441	204	202	0.0457435
TM4SF1	4177.52	203	203	0.00452171
GTF2IP14	12.7388	202	204	0.0179148
RP11-111J6.2	11.6763	203	203	4.82e-05
ENKUR	11.7535	202	204	0.00990112
PCDHGA7	23.9613	202	204	0.0241012
ARL14	138.527	203	203	0.0411479
DSEL	94.3486	203	203	0.000702882
USP32	1211.83	204	202	0.0146082
AC002059.10	16.6307	203	203	0.00114833
OLFML3	577.212	203	203	0.00380531
F13A1	420.641	204	202	0.0149664
AP001189.4	4.07913	203	203	0.0288939
MIR4263	5.98772	203	203	0.00456374
CTD-2017F17.2	41.0202	203	203	0.000285211
TTC28-AS1	507.47	202	204	0.00369004
BACH2	55.9724	203	203	0.00474957
PRMT5	2143.38	202	204	0.0152584
RP11-700J17.1	8.41869	204	202	0.0343852
DDAH1	1540.6	204	202	0.0333062
RNU6-8	9.74599	202	204	0.0105671
ZDHHC1	330.06	203	203	0.0138348
CYP51A1	151.529	202	204	0.0117165
IL33	225.215	203	203	0.00858668
RP11-1094M14.5	3.84106	204	202	0.0348073
FUT8-AS1	12.2888	204	202	0.0248848
RP3-412A9.17	3.31083	203	203	0.00967247
CREBZF	2278.57	203	203	0.0191988
C2orf40	7.00347	204	202	0.00188754
UCHL1	278.207	203	203	0.0010416
AKNAD1	4.94339	202	204	0.0296794
RP4-742C19.12	3.24227	204	202	0.0464176
RP11-567F11.2	1.6246	202	204	0.0493945
C7orf65	0.84048	204	202	0.00257984
RN7SL208P	2.22714	202	204	0.0250729
SRP72P2	2.01768	202	204	0.0303183
SLC5A12	46.83	202	204	0.0295807
RNF144A-AS1	49.3999	203	203	0.00271722
LINC01311	50.7946	202	204	0.000187458
SPATA20	2831.6	202	204	0.0129689
RP11-254A24.2	9.76118	204	202	0.00991746
PRKAR2A	2252.59	204	202	0.0283596
RP11-90M2.5	4.28525	204	202	0.0323073
OXSM	537.293	203	203	0.0156505
KIF16B	975.869	203	203	0.0287631
RP11-766N7.3	2.33997	204	202	0.00677906
RP11-352G9.1	4.37337	203	203	0.0282261
ZMAT4	1.57458	203	203	0.0483082
PDLIM7	2925.04	202	204	0.0340336
RNGTT	810.512	203	203	0.0251632
MCAM	3345.77	203	203	0.033502
RP11-350E12.4	1.81222	203	203	0.000632172
TMC7	695.571	203	203	0.00850997
PTPRD-AS1	2.07283	203	203	0.0123826
TRAF4	7546.23	203	203	0.00958787
CTD-3088G3.4	3.36723	203	203	0.0314257
RP11-84C10.4	12.6489	203	203	0.00687782
GATA6	166.173	204	202	0.0141403
SCN4B	80.6907	203	203	0.000914197
RP11-267J23.4	21.7617	204	202	0.0024808
POLD2	4839.03	202	204	0.00126968
ADAM12	809.976	203	203	0.0126434
CPA4	49.6713	203	203	3.04e-05
RNU4-52P	1.72343	203	203	0.0388062
CTA-246H3.11	4.84778	202	204	0.00524042
SNORD89	7.88201	203	203	0.00979918
TPI1	29248.8	202	204	0.00768462
FKBP9P1	54.2363	202	204	0.0442042
RHOT1P1	1.13868	203	203	0.0333528
MAP2	91.7445	204	202	7.99e-05
PCDHGC3	330.009	203	203	0.00590425
NEDD8	3482.94	202	204	0.0234893
TUBA8	4.92622	203	203	0.0338064
CCNB1	3021.59	203	203	0.00107721
HMGN3	2256.51	203	203	0.0483329
STXBP5-AS1	28.9253	204	202	0.00472121
CCDC148	21.7176	203	203	0.0466189
TBX2	2720.54	204	202	0.0478671
RP11-83A24.1	1.65833	202	204	0.0096423
HS6ST2	580.878	203	203	0.00562505
RP11-17P16.1	34.8421	203	203	0.0112344
GPIHBP1	32.268	204	202	0.0108382
LA16c-385E7.1	6.45171	203	203	0.0155123
ANKRD24	48.6541	203	203	0.00344841
GBE1	1108.19	203	203	0.0110732
FBXO38	1453.49	202	204	0.0435275
RP11-421F16.3	628.417	202	204	0.0237223
MSTN	2.94624	203	203	0.0196023
RP11-141O15.1	1.25768	203	203	0.00865829
RP11-582E3.4	2.57238	202	204	0.00578785
TTC6	102.562	204	202	0.0288
ATXN1L	1709.07	204	202	0.00792025
XPO6	5113.54	204	202	0.000974011
ECM1	1041.22	203	203	0.000840205
IL1RL1	22.3443	204	202	0.0037572
RP5-994D16.3	8.55037	202	204	0.0130994
RNU7-171P	1.13697	204	202	0.00569651
RP11-321F8.4	12.9647	202	204	0.00424471
MIR7851	0.261757	203	203	0.0181046
BOLA2B	44.1646	203	203	0.0293742
RP11-127B20.3	19.0748	203	203	0.00277308
GABPB1	1489.13	203	203	0.0451285
SLC22A20	96.3926	203	203	0.0136407
RP11-329N15.3	29.3083	203	203	0.00492299
C17orf47	2.73665	202	204	0.00422541
RP11-313P13.5	4.22286	203	203	0.00348589
RP11-51J9.6	8.9172	202	204	0.00527331
YWHAZP4	49.9931	203	203	0.028336
HYOU1	7646.23	204	202	0.0424853
NOL4L	1643.22	203	203	0.000987719
CYP2W1	27.7408	202	204	0.00416434
NRBF2P5	6.3072	203	203	0.020027
EGR3	207.183	204	202	0.0451531
YTHDC1	3544.97	204	202	0.00971686
SLC4A1AP	1419.41	202	204	0.000539524
SEPT7P2	326.963	202	204	0.00164222
PRCAT47	8.81205	203	203	0.0428209
MIR6739	1.18813	203	203	0.0172368
RP11-380L11.4	15.2655	203	203	0.00928088
FAM76B	683.386	203	203	0.042903
RTEL1-TNFRSF6B	126.872	202	204	0.038424
CYSLTR2	24.9777	204	202	0.0129726
ACSS3	91.468	203	203	0.00374244
RPL23P2	13.4579	203	203	0.00159965
CTA-941F9.10	35.1312	202	204	0.0269644
SLFN14	1.23215	204	202	0.00251031
RTCA	1647.49	203	203	0.0015868
DMRT1	0.691505	203	203	0.0453767
KLK6	8.75736	203	203	0.000339213
ANKRD10-IT1	180.158	203	203	0.0268653
RP11-685G9.2	2.61061	203	203	0.0107889
KLK8	2.12708	203	203	0.000528938
CALCA	0.708347	203	203	0.015241
FAUP1	10.8215	203	203	0.0355102
LA16c-60H5.7	11.2797	203	203	0.0480115
LRRIQ4	13.6343	204	202	0.0404371
AMIGO2	3864.2	203	203	0.00949246
RP11-573D15.8	3.83418	203	203	0.000711213
BMP1	2072.12	203	203	0.0200201
NEURL3	28.892	204	202	0.0123265
NFYA	1626.15	202	204	0.0325772
RP4-616B8.6	2.32992	202	204	0.0287123
MYO7A	301.029	204	202	0.0436468
FADS2	1993	204	202	0.0144302
PIGA	783.436	203	203	0.0474568
EIF3C	281.289	204	202	0.000514838
LINC00176	63.0664	202	204	0.011499
FAM193B	1924.71	203	203	0.000519076
FAM184B	13.1486	203	203	0.00500635
ACSBG2	5.11648	203	203	0.0135195
HPSE	191.491	203	203	0.00156524
TPST1	896.688	203	203	0.000140798
MTND4P24	3.48372	204	202	0.0136505
PEX11A	409.074	203	203	0.0472639
AC006277.3	27.8383	203	203	0.0073124
NAP1L3	31.1636	204	202	0.0329637
CDCA7L	257.399	203	203	0.0129789
ABCC3	2445.57	202	204	0.048086
RABEP2	2053.48	202	204	0.0212131
AC096670.3	13.9445	204	202	0.00508827
GGT3P	1.32168	204	202	0.047766
RP11-213G2.3	89.4079	204	202	0.0219244
RP11-480A16.1	68.1635	203	203	0.00761424
CTD-2536I1.2	1.45957	204	202	0.000826054
BTN2A1	1348.29	203	203	0.00101322
HSP90AB2P	37.7485	204	202	0.0409866
RP11-434D12.1	17.0367	203	203	0.0387044
RP1-292B18.4	0.794185	202	204	0.00382028
SEC23A	2236.64	203	203	0.000802312
HNF1B	382.302	203	203	0.00153565
FAM151A	32.9391	204	202	0.0492716
SPG20	1954.23	203	203	0.0258535
SCRN1	2709.68	203	203	0.00156134
RNF19B	2075.86	203	203	0.0354269
RP11-734K2.4	70.5281	203	203	0.00142552
MEPE	1.18299	204	202	0.00125962
KDELR1	12676	203	203	0.0113144
THTPA	204.772	204	202	0.0487152
AC012314.8	46.8441	203	203	0.038384
ZNF57	268.719	202	204	0.0334895
ALG9	322.563	203	203	0.0447686
RPP21	568.118	203	203	0.00172512
SRPX	274.975	204	202	0.0437015
U73166.2	26.0233	203	203	0.0185455
CBARP	75.5859	203	203	0.000132972
C14orf105	1.23584	204	202	0.00362477
NPM1P18	0.73556	203	203	0.00449027
AGTR1	17.791	204	202	0.0171302
IGF2BP2	573.151	202	204	0.0291059
PPFIBP2	2613.62	203	203	7.07e-05
VIM-AS1	23.4336	204	202	0.0476029
Six3os1_1	2.40917	203	203	0.0399456
EGFR-AS1	4.48624	203	203	0.00265364
CPNE7	81.6455	202	204	0.00503728
CTD-2116N20.1	5.85512	202	204	0.0117718
KPNA2	7664.92	203	203	0.00995279
CCDC155	1.28709	204	202	0.0189985
SPRR1B	139.272	202	204	0.0376663
DTNA	119.291	204	202	0.0108908
RP3-406P24.4	2.92199	203	203	0.0344556
C4orf33	447.601	203	203	0.000311046
PINX1	320.937	202	204	0.0285194
OLFML2B	851.166	203	203	0.0199462
RP5-1042K10.10	0.832709	202	204	0.00981007
TTC14	1106.85	204	202	0.0114265
GOLGA5	2528.39	203	203	0.0371905
CCNYL1	771.458	203	203	0.00120592
PCDHGA4	26.5025	203	203	0.00133709
UNC93B2	2.40399	202	204	0.00114057
RP11-282O18.7	2.5392	203	203	0.00753469
BAALC	54.9818	203	203	0.0117077
TLR6	76.3984	204	202	0.0202801
UNC93B5	0.992833	202	204	0.00103771
PLEKHS1	53.7792	203	203	0.000591347
RP11-438B23.2	0.955064	203	203	0.00142735
RP11-339B21.10	18.8976	203	203	0.00123611
CTC-398G3.1	3.60905	203	203	0.0313908
FBN1	1751.37	203	203	0.0318238
RP11-452J21.2	1.06163	203	203	0.041635
RP11-395B7.2	1.83674	202	204	0.00779437
FAM13A	1342.58	203	203	0.0224942
CHPF2	3852.51	204	202	0.00592558
KRBOX4	439.017	203	203	0.00462819
PABPC4L	31.4895	203	203	0.0359036
PCDHGB5	37.33	203	203	0.0114069
MRO	14.2791	203	203	0.0226278
LYPD6B	1591.29	203	203	0.0354106
AC139100.4	16.5879	204	202	0.0434936
SNED1	168.732	203	203	0.0197345
CCDC66	491.163	203	203	0.0117476
HERC2P9	275.332	203	203	0.0212278
MT1X	997.551	202	204	0.00576436
MYL3	3.51399	204	202	0.0181164
TAS2R14	44.8338	202	204	0.0318845
IL9RP3	11.21	204	202	4.74e-05
EIF4HP2	25.6496	203	203	0.000983344
IGF2R	5434.83	204	202	0.00385508
RP11-192H23.4	98.7457	203	203	0.00576853
CPT1C	168.557	203	203	0.0160506
ALOX12-AS1	103.688	203	203	0.0339852
C10orf95	36.7362	202	204	0.022962
PDE1C	41.2013	203	203	0.0161721
SEC13P1	0.974365	203	203	0.00686433
RP11-672L10.6	38.5911	203	203	0.0306084
RPAIN	1138.61	203	203	0.0234919
GATA3	9824.15	204	202	0.00820486
DSTYK	939.153	202	204	0.00593381
ARHGEF25	483.729	203	203	0.0215637
FBN2	286.11	203	203	0.00532365
LOXL2	1514.48	203	203	0.00759624
GRIK1	11.7303	204	202	0.0438191
BTF3L4P2	47.9244	202	204	0.0154385
RP11-291B21.2	7.64437	204	202	0.0429862
CH17-140K24.5	0.972314	203	203	0.0342907
NXPE3	513.722	204	202	0.0123772
TRIM52	357.3	204	202	0.0151704
RP11-462B18.2	0.837047	203	203	0.00386886
NIN	1926.68	203	203	0.0106277
RP11-1348G14.1	3.64419	202	204	0.0402944
KNSTRN	986.748	203	203	0.0366402
RP5-940J5.8	0.518765	204	202	0.035824
SCARF2	321.388	203	203	0.00670778
LRFN2	26.4887	203	203	0.000735224
MASP2	19.2011	203	203	0.0202911
RCHY1	636.816	203	203	0.023391
ZNF527	203.794	202	204	0.0181613
TBX2-AS1	180.841	204	202	0.00698598
FBXO17	186.701	202	204	0.0269858
CADPS	8.43764	203	203	0.00388079
CASQ2	20.5663	204	202	0.000133461
PDXDC2P	143.221	202	204	0.00379127
PPEF1	17.0596	203	203	0.0212737
RP11-499P20.2	76.9221	203	203	0.000106229
ADCY3	1293.79	203	203	0.0134272
KANK4	14.1728	203	203	0.00169928
NPIPB5	67.6371	204	202	0.00978211
RP11-363E7.4	2231.26	203	203	0.00373851
STON1-GTF2A1L	1.8118	203	203	0.0466671
LRMP	775.167	204	202	0.0405302
RP11-578O24.2	12.4766	202	204	0.00898554
ZNF234	360.655	203	203	0.00880703
BCHE	23.6083	204	202	0.00793468
PRDX6	10062.8	203	203	0.0128788
RP11-141B14.1	6.00237	204	202	0.00390517
RP11-90B9.2	2.74202	202	204	0.0384517
ELANE	1.46227	203	203	0.040323
GARNL3	179.859	203	203	0.00182759
CAMK2N2	30.4113	202	204	0.0435843
RP11-258C19.7	281.848	203	203	0.00140762
STT3A	7239.96	203	203	0.020506
RP3-508I15.20	14.3712	204	202	1.95e-06
TXLNB	19.9055	204	202	0.0246948
NTF3	14.581	204	202	0.0237149
MTG1	422.31	202	204	0.00120981
RP11-140H17.2	2.11463	203	203	0.00764507
CTC-479C5.12	143.949	204	202	1.34e-05
CCIN	4.52127	203	203	0.00424142
P3H3	1261.41	203	203	0.0255284
ASLP1	8.35	202	204	0.0163653
PGM5P4	0.783419	204	202	0.0474245
GDF5	2.57831	203	203	0.0354363
CEBPA-AS1	211.811	204	202	0.0391418
C4B	102.141	204	202	0.0380265
SPRR2D	15.2437	204	202	0.00792624
CNGA4	5.8274	203	203	0.00797981
PGAM1P5	4.36276	204	202	0.00180759
CCNJL	467.183	203	203	0.00266626
XXbac-BPGBPG55C20.2	33.5545	204	202	0.00658397
DSP	14037.4	202	204	0.0108107
NCOR1	3763.94	203	203	0.00688075
HIVEP2	1834.69	203	203	0.0339989
MST1L	24.4495	203	203	0.0216781
ASCL2	136.695	202	204	0.0081664
RP11-529H22.1	0.514504	202	204	0.0228346
RP5-966M1.6	46.8064	204	202	2.97e-06
TAPBPL	1323.11	204	202	0.00460532
AL138706.1	1.08476	203	203	0.00174688
RP5-1115A15.2	0.973997	203	203	0.0251747
NEURL1B	1001.6	203	203	0.0435543
SLC22A3	67.7695	203	203	0.0269284
RP11-571M6.18	7.90034	202	204	0.00133201
NES	1319.19	203	203	0.0194359
OR8T1P	2.03286	203	203	0.00764271
LTBP2	2768.24	203	203	0.00154179
RBFA	981.244	204	202	0.0411656
TCN1	71.8645	202	204	0.0499549
LA16c-306A4.1	12.2569	204	202	0.0263402
GATA2	1087.53	203	203	0.000345683
KIAA1161	845.193	202	204	0.0019692
ALG1	812.386	203	203	0.0177747
CEP135	470.556	203	203	0.0334684
AC104532.4	15.7294	204	202	0.00151183
AC090954.5	4.7356	203	203	0.0207942
PLS3	4578.74	203	203	0.00225566
VPS25	2828.07	203	203	0.00473275
GPR182	6.2573	203	203	0.0321189
HDAC10	555.23	204	202	0.0266864
CCNL1	4066.43	203	203	0.0162133
PRELP	366.791	204	202	0.00277082
CTD-2007L18.5	8.74288	202	204	0.0378114
EDC3	1510.91	203	203	0.0265649
FAM166B	16.7441	203	203	4.05e-05
KRT8P40	0.676864	204	202	0.0108493
ZNF302	793.211	202	204	0.000118444
ATP8B1	4293.43	203	203	0.0351625
PLEKHH1	724.424	203	203	0.0386679
RP11-1275H24.2	20.2949	202	204	0.00424874
RAB40C	2086.45	203	203	0.00691484
SAPCD1	23.8907	204	202	0.0124572
RPS6P12	1.59789	203	203	0.0183438
KLF15	124.721	203	203	0.0491225
ACSM6	12.5419	203	203	0.00180529
RP3-342P20.2	17.4761	202	204	0.026648
CTRC	6.16751	203	203	0.0351904
RP11-326I11.5	18.5371	204	202	0.000220443
OXA1L	4551.2	202	204	0.0488249
SLC46A3	416.301	204	202	0.0362068
ZNF780B	512.444	203	203	0.0330009
CDC42EP2	616.566	203	203	0.0119299
STXBP5L	5.71805	203	203	0.0482809
PIN4	970.442	203	203	0.000986963
VAPA	7516.39	203	203	0.004317
RP11-493L12.6	14.4299	204	202	0.0103331
RP11-250B2.4	5.10401	203	203	0.045448
KAAG1	0.95278	203	203	0.0288989
FILIP1L	1054.59	203	203	0.0056463
DYNC1H1	17676.7	203	203	0.00634863
RP4-601P9.2	10.4249	203	203	0.00678727
RP11-385F7.1	52.6944	203	203	0.00478961
KCCAT333	129.864	203	203	0.049998
RP3-393E18.2	4.34101	203	203	0.00800177
SLC26A7	8.98758	204	202	0.0157923
KANSL3	2437.53	202	204	0.000979441
HSPB6	137.487	204	202	1.47e-05
CYP1B1	332.3	203	203	0.0129664
RP11-94I2.4	3.80065	203	203	0.00752786
RAD51-AS1	153.616	202	204	0.0270282
CFAP44-AS1	1.30661	203	203	0.0487374
SLC25A5P1	11.5135	204	202	0.00180995
RP11-338K17.10	8.12269	202	204	0.0181867
RP1-20C7.6	13.3886	204	202	0.0219744
CPXM2	304.727	203	203	0.0160741
CRTC2	3051.49	204	202	0.0299654
CTD-2008P7.9	98.01	203	203	0.00876842
TPH1	13.3178	204	202	0.000341997
TOX3	317.214	203	203	0.00250814
TRPM2-AS	120.289	203	203	0.0247568
UFSP2	734.43	204	202	0.00364971
RTTN	444.645	203	203	0.0454016
MAPK10	790.221	202	204	0.0268286
GS1-304P7.3	0.694695	203	203	0.0207048
CTC-277H1.6	3.83775	203	203	0.0222916
RP11-449P15.2	161.412	202	204	0.0235257
COL5A2	5445.54	203	203	0.0212531
GOLGA2P5	377.2	204	202	0.00856173
ZFP42	0.769805	203	203	0.0372687
MAP3K19	3.31647	204	202	0.0273065
MIF-AS1	38.9746	202	204	0.0274224
DIAPH2	909.775	203	203	0.0088631
ABI3BP	206.477	204	202	0.00891943
S100A7A	1.49397	203	203	0.0135002
SPTA1	2.44081	203	203	0.00724738
MSC-AS1	101.594	203	203	0.00472774
RP11-419C5.2	13.9375	202	204	0.00426401
HOXB3	844.572	203	203	0.000698418
CTD-2310F14.1	8.52902	203	203	0.030415
RP11-285J16.1	8.68364	202	204	0.00394526
RP11-697N18.4	8.57162	203	203	0.0109508
SLC30A8	1.53851	204	202	0.0409622
ABL2	1258.52	203	203	0.0242316
LINC01402	1.16243	204	202	0.0318504
CTB-129O4.1	25.7446	202	204	0.00538883
CTC-499B15.8	4.1019	203	203	0.0175275
GPRC5C	3312.49	203	203	0.0363627
RP11-423P10.2	43.7987	202	204	0.00125675
RP11-752G15.8	4.61473	203	203	0.00305196
COQ9	2513.97	203	203	0.0454682
THBS4	61.0156	203	203	0.00424453
RBCK1	5675.78	203	203	0.0104031
RPL34P31	1.21677	204	202	0.0145074
RP11-376P6.3	5.43379	204	202	0.00759249
RP1-102E24.10	24.5014	204	202	0.00128317
NGF	17.9072	203	203	0.0110605
REPIN1	4284.57	203	203	0.00224078
TMEM198B	732.32	203	203	0.000377534
GATA3-AS1	311.321	203	203	0.00305321
MIR3142HG	21.1801	204	202	0.0425775
AC006942.4	16.3217	203	203	0.0256656
YIF1B	2086.29	203	203	0.0447181
RP11-456D7.1	1.11856	203	203	0.00155404
DDAH2	2205.58	203	203	0.0164711
XXyac-YM21GA2.7	2.70554	203	203	0.00521067
NAP1L6	1.32105	203	203	0.0264474
CNOT6L	1675.77	203	203	0.0160306
CYS1	58.1787	203	203	0.0225102
SIRPG-AS1	0.671147	204	202	0.00396348
RP11-513M16.8	61.2026	204	202	0.00112436
SMC2-AS1	7.8398	203	203	0.000919488
TLL1	33.3393	204	202	2.08e-05
RP11-64P14.7	2.05012	203	203	0.0325816
MARVELD1	2337.25	203	203	0.0218256
DACT1	225.419	203	203	0.00299836
OR10AB1P	0.813604	203	203	0.0302721
HHIPL1	153.425	203	203	0.00384917
RP11-277P12.9	3.89791	202	204	0.024819
LINC00675	84.5819	203	203	0.0273308
RPL9P32	5.11422	204	202	0.0141994
PMEPA1	2939.64	203	203	0.000251201
CTD-2020K17.4	55.7288	203	203	0.0206883
SH3YL1	3071.6	204	202	0.0250665
SYDE1	614.284	203	203	0.00334682
ERC1	1982.85	203	203	0.00829482
RP5-1056L3.3	47.0975	203	203	0.038985
SHTN1	870.861	203	203	0.00116492
MTND3P25	0.621838	204	202	0.000446166
RP4-740C4.5	44.5453	203	203	0.0289518
ZNF33A	1826.05	202	204	0.0470108
PCDHGA8	6.7275	202	204	0.0241622
MIR1270	0.641735	203	203	0.00235464
ARHGAP12	1713.57	203	203	0.0251699
RP11-400N9.1	1.07998	204	202	0.00322947
GXYLT1	920.675	203	203	0.0107898
PSMA7	9253.05	202	204	0.0212715
GSTM1	67.3448	204	202	0.0467786
PDZRN3	247.059	204	202	0.0489686
MCF2L	1408.08	204	202	6.19e-05
TRMT2A	1993.43	202	204	0.0104814
FAM43A	272.887	204	202	0.00330635
UBAC1	2117.26	203	203	0.0277712
KCNJ8	179.234	203	203	0.020046
VCAN	3679.98	203	203	0.0395157
ZNF606	512.532	203	203	0.0108418
AC007292.4	0.967504	202	204	0.0257144
DUSP14	773.912	203	203	0.00154832
CTB-31O20.2	122.841	203	203	0.0292313
PDCD6IPP2	8.11898	203	203	0.0376548
LINC01372	15.892	204	202	0.0107656
TANGO6	690.728	202	204	0.0343917
TIA1	3888.46	202	204	3.49e-05
GS1-124K5.10	15.4333	202	204	0.0264601
FAT4	142.825	204	202	0.0237963
STARD4	278.221	203	203	0.0150368
TCF7L1	406.204	203	203	0.00425781
DEPDC5	887.199	202	204	0.00457239
RP11-1M18.1	5.2984	203	203	0.00921733
ASS1	4504.09	202	204	0.0225629
BRDT	1.10373	204	202	0.00703539
FAM110B	87.337	203	203	0.00201878
RP11-365P13.5	12.1345	203	203	0.00852879
CAMSAP3	1876.78	203	203	0.0119658
SPTBN1	11376.4	202	204	0.0288859
RP11-21K12.3	2.36877	202	204	0.0348436
RP11-598F7.3	2.03658	204	202	0.0103757
LINC00894	82.3355	203	203	0.0122046
[truncated: 3,020 more rows]

## Sheet: Prognosis related DEGs
id	baseMean	baseMeanA	baseMeanB	foldChange	log2FoldChange	pval	padj	Change	median expression value	low	hight	logrank.p.val
A2M	25516.5	106484	21800.7	0.204733	-2.28819	1.71972e-10	5.42658e-08	down-regulation	12427.5	204	202	0.0286314
AARD	60.4267	618.141	34.8311	0.0563482	-4.14949	1.27846e-06	0.000107933	down-regulation	5.83085	204	202	0.042742
ABCC9	277.244	1344.06	228.284	0.169847	-2.5577	4.84075e-05	0.00270618	down-regulation	112.82	203	203	9.24e-05
ABI3BP	750.947	5554.68	530.486	0.0955025	-3.38832	2.10525e-15	3.04465e-12	down-regulation	206.477	204	202	0.00891943
AC002398.12	6.75136	58.3713	4.38233	0.0750768	-3.73549	0.00016256	0.00743024	down-regulation	0.658755	204	202	0.0342273
AC013461.1	3134.51	20451.6	2339.77	0.114405	-3.12778	1.03155e-10	3.6895e-08	down-regulation	1644.87	202	204	0.0193803
ACTA2	20816.6	153178	14742.1	0.096241	-3.3772	4.7905e-10	1.32789e-07	down-regulation	6422.39	204	202	0.0255849
ACTC1	4156.76	61582.9	1521.26	0.0247027	-5.33919	8.79989e-08	1.03067e-05	down-regulation	38.8762	203	203	0.00709277
ADAMTS9-AS1	114.58	1542.2	49.0611	0.0318125	-4.97426	1.50408e-10	5.05355e-08	down-regulation	8.39819	204	202	0.000527992
ADAMTS9-AS2	25.1989	243.138	15.1969	0.0625032	-3.99993	3.88557e-06	0.000296435	down-regulation	5.65319	203	203	0.00276954
ADAMTSL3	159.397	1727.54	87.4286	0.0506088	-4.30447	7.25045e-11	2.94112e-08	down-regulation	26.4678	204	202	0.000165596
ADCY5	630.474	4497.55	453	0.100722	-3.31156	4.49786e-09	8.1311e-07	down-regulation	128.18	204	202	0.0464853
ADGRA2	1652.56	7415.65	1388.07	0.187181	-2.41749	1.87534e-10	5.77588e-08	down-regulation	856.556	203	203	0.0422557
ADGRD1	344.881	3541.88	198.159	0.0559474	-4.15978	7.13801e-10	1.84055e-07	down-regulation	46.7767	204	202	0.0244202
ADRA1D	25.3663	132.532	20.448	0.154288	-2.6963	0.0012165	0.0399261	down-regulation	6.1799	204	202	0.00432092
ADRB3	36.5124	322.637	23.3811	0.0724689	-3.78649	2.40543e-05	0.0014817	down-regulation	4.14331	204	202	0.0195273
AGTR1	104.393	784.183	73.1946	0.0933387	-3.42138	2.02067e-05	0.00127298	down-regulation	17.791	204	202	0.0171302
AKAP6	260.617	2373.18	163.664	0.068964	-3.85801	1.73606e-07	1.85089e-05	down-regulation	76.1507	203	203	0.00778447
AMOTL1	2910.61	10338.2	2569.74	0.248567	-2.00829	4.87206e-07	4.6703e-05	down-regulation	1996.51	202	204	0.00522755
ANXA6	5078.53	21929.9	4305.16	0.196314	-2.34876	1.95648e-10	5.97051e-08	down-regulation	2717.44	204	202	0.0182359
AOC3	2357.2	18194.9	1630.35	0.0896049	-3.48028	8.06126e-11	3.15461e-08	down-regulation	716.346	204	202	0.00137234
AOX1	229.575	1881.02	153.784	0.0817556	-3.61254	2.92723e-09	5.79575e-07	down-regulation	36.6646	204	202	0.0107124
AP000892.6	553.453	4767.46	360.057	0.0755238	-3.72693	5.13907e-08	6.42635e-06	down-regulation	118.312	204	202	0.00680796
ARHGAP20	92.9876	657.094	67.0986	0.102114	-3.29174	8.45762e-05	0.00427547	down-regulation	34.5613	203	203	0.047186
ARHGEF25	831.288	3884.4	691.17	0.177935	-2.49058	3.25509e-08	4.29659e-06	down-regulation	483.729	203	203	0.0215637
ARID5B	3279.86	11863.1	2885.94	0.243269	-2.03937	3.35955e-08	4.39956e-06	down-regulation	2325.36	203	203	0.0126814
ASTL	28.237	182.667	21.1496	0.115782	-3.11051	0.00010926	0.00531333	down-regulation	6.91663	204	202	0.0156847
ATP2B4	6699.39	24763.7	5870.35	0.237055	-2.07671	1.64198e-09	3.76671e-07	down-regulation	4753.48	203	203	0.00149534
BAG2	861.054	4503.29	693.899	0.154087	-2.69818	2.11572e-09	4.56981e-07	down-regulation	483.434	202	204	0.0212843
BCHE	171.983	1251.86	122.424	0.0977931	-3.35412	5.9318e-05	0.00317729	down-regulation	23.6083	204	202	0.00793468
BHMT2	94.8921	944.558	55.8978	0.0591788	-4.07878	1.84944e-07	1.96077e-05	down-regulation	22.309	204	202	0.00486836
BOC	636.341	3031.6	526.414	0.173642	-2.52581	4.76531e-05	0.00267751	down-regulation	193.415	203	203	3.6e-05
BTG2	15177.3	61971	13029.7	0.210255	-2.24979	2.1734e-14	2.4098e-11	down-regulation	9075.17	203	203	0.00806499
BVES	321.19	1848.96	251.075	0.135792	-2.88053	5.67166e-06	0.000412815	down-regulation	103.023	204	202	0.0308624
C2orf40	127.934	1567.15	61.8834	0.0394878	-4.66245	1.93901e-11	1.00777e-08	down-regulation	7.00347	204	202	0.00188754
CACNA2D1	512.377	2340.09	428.496	0.183111	-2.44921	2.24167e-05	0.00139642	down-regulation	192.491	203	203	0.000960751
CALD1	13672.8	92909	10036.3	0.108023	-3.21059	3.50793e-08	4.55798e-06	down-regulation	6863.57	203	203	0.00934306
CAMK2A	47.4031	413.051	30.6222	0.0741365	-3.75367	3.87596e-05	0.00223442	down-regulation	9.96443	203	203	0.00815973
CAP2	491.457	2041.92	420.301	0.205836	-2.28043	4.6935e-05	0.0026461	down-regulation	313.135	204	202	0.00822164
CASQ2	597.419	7729.06	270.122	0.0349489	-4.83861	6.12652e-08	7.60397e-06	down-regulation	20.5663	204	202	0.000133461
CCDC80	5063.43	26561.6	4076.8	0.153485	-2.70383	6.12186e-07	5.60968e-05	down-regulation	1668.96	203	203	0.0014311
CD34	2140.08	7976.29	1872.23	0.234725	-2.09096	1.02901e-09	2.55432e-07	down-regulation	1440.91	204	202	0.0496749
CDC20	3931.99	769.729	4077.12	5.29682	2.40513	8.3727e-07	7.38729e-05	up-regulation	3588.62	202	204	0.0230677
CDH19	88.1031	510.866	68.701	0.13448	-2.89454	0.000421691	0.0167583	down-regulation	5.47159	203	203	0.0199319
CDON	254.412	1047.87	217.997	0.20804	-2.26507	0.000542068	0.0206914	down-regulation	119.313	203	203	0.0159005
CFL2	1238.58	8844.87	889.496	0.100566	-3.31378	5.05002e-10	1.38825e-07	down-regulation	591.833	203	203	0.00413416
CHRDL1	378.556	2585.02	277.293	0.107269	-3.22069	1.31134e-05	0.000882976	down-regulation	23.8942	204	202	0.0133179
CHRM2	191.735	2125.2	103.001	0.0484663	-4.36687	3.20516e-11	1.56784e-08	down-regulation	7.1306	203	203	0.0491793
CLEC3B	267.462	3077.11	138.517	0.0450152	-4.47344	4.14374e-20	1.72292e-16	down-regulation	66.9866	204	202	0.0492515
CLIC4	7172.84	29423.3	6151.68	0.209075	-2.25791	5.32033e-09	9.21719e-07	down-regulation	4821.82	203	203	0.0434901
CMA1	51.6175	356.729	37.6148	0.105444	-3.24545	0.000153288	0.00709153	down-regulation	3.5577	203	203	0.0184158
CNN1	9516.19	116717	4596.34	0.0393801	-4.66639	1.97634e-08	2.89599e-06	down-regulation	723.263	204	202	0.0152779
CNTN1	880.178	5842.68	652.43	0.111666	-3.16274	9.01638e-05	0.00453724	down-regulation	110.776	203	203	0.0102887
COL14A1	2372.12	13686.4	1852.87	0.135381	-2.8849	9.86012e-09	1.61565e-06	down-regulation	827.112	204	202	0.0014021
COLEC12	762.22	2884.37	664.826	0.230493	-2.1172	1.66981e-05	0.0010806	down-regulation	239.823	203	203	0.0497633
CPEB1	61.4425	474.008	42.5084	0.0896787	-3.47909	6.95336e-05	0.00363663	down-regulation	15.6439	203	203	0.0311804
CPED1	475.738	4550.1	288.751	0.0634603	-3.978	1.7293e-10	5.42658e-08	down-regulation	128.881	203	203	0.00201308
CPXM2	1019.93	6147.46	784.608	0.127631	-2.96995	6.85108e-07	6.22643e-05	down-regulation	304.727	203	203	0.0160741
CRYAB	1559.72	13606.3	1006.86	0.0739996	-3.75634	0.000471463	0.0183204	down-regulation	409.266	203	203	0.000130093
CSRP1	17838.7	134030	12506.3	0.0933096	-3.42183	3.31804e-09	6.30674e-07	down-regulation	8665.3	203	203	0.00260074
CTD-2006M22.2	20.1398	146.228	14.3532	0.0981565	-3.34877	0.000853284	0.0298766	down-regulation	4.66562	204	202	0.00135655
CTGF	9228.01	58498.5	6966.8	0.119094	-3.06983	7.63343e-07	6.80726e-05	down-regulation	3527.86	203	203	0.0274526
CTSG	155.987	925.293	120.681	0.130424	-2.93872	7.93111e-05	0.00404001	down-regulation	20.3271	204	202	0.00388313
CYR61	10246.8	63080.7	7822.02	0.124	-3.01158	1.97358e-12	1.23863e-09	down-regulation	4558.23	204	202	0.0457194
DACT3	447.127	3081.45	326.228	0.105868	-3.23966	5.81702e-09	9.97379e-07	down-regulation	136.246	204	202	0.0246816
DCHS1	1001.52	4106	859.046	0.209217	-2.25693	5.99015e-07	5.5194e-05	down-regulation	531.4	203	203	0.00708623
DCHS2	34.0825	226.219	25.2646	0.111682	-3.16253	0.000671549	0.024574	down-regulation	5.86977	202	204	0.00215076
DCLK1	269.392	1228.79	225.361	0.183401	-2.44693	0.000361555	0.0147563	down-regulation	71.4315	203	203	0.0238244
DCN	15761.2	80330.4	12797.9	0.159315	-2.65004	7.61165e-11	3.05044e-08	down-regulation	5710.79	203	203	0.0231502
DDR2	1271.57	6923.32	1012.19	0.1462	-2.77398	2.00532e-11	1.0262e-08	down-regulation	542.509	203	203	0.0072061
DGKB	39.3826	371.218	24.1535	0.0650656	-3.94196	6.00891e-05	0.00320311	down-regulation	3.17004	203	203	0.00135758
DIXDC1	693.846	4741.13	508.101	0.107169	-3.22205	3.25762e-12	1.90102e-09	down-regulation	332.079	203	203	0.00156534
DLGAP5	1235.02	315.774	1277.21	4.04469	2.01603	0.000410713	0.0164004	up-regulation	1066.26	203	203	0.0497925
DNAJB5	715.961	4208.83	555.66	0.132023	-2.92114	1.153e-09	2.82002e-07	down-regulation	351.494	203	203	0.0140672
DOK6	178.104	1392.02	122.392	0.0879241	-3.5076	4.17098e-06	0.00031389	down-regulation	40.5677	203	203	0.00079617
DPYSL3	6858.3	30836.3	5757.86	0.186723	-2.42103	1.41582e-06	0.000118327	down-regulation	3086.87	203	203	0.0225964
DSTN	20089.9	71788.6	17717.3	0.246798	-2.0186	8.81557e-10	2.22146e-07	down-regulation	16066.9	204	202	0.000680995
DTNA	541.647	5226.35	326.649	0.0625004	-3.99999	6.41765e-08	7.90106e-06	down-regulation	119.291	204	202	0.0108908
DUSP2	2222.47	10793.5	1829.11	0.169464	-2.56095	4.23274e-07	4.1532e-05	down-regulation	697.786	204	202	0.0170131
EBF1	303.412	1469.94	249.876	0.169991	-2.55647	1.47433e-05	0.000971099	down-regulation	140.124	203	203	0.0105528
EDNRA	616.991	2256.73	541.738	0.240054	-2.05857	2.09518e-05	0.00131247	down-regulation	348.418	203	203	0.0466861
EGR2	541.853	2348.15	458.955	0.195454	-2.3551	5.88806e-08	7.33538e-06	down-regulation	251.073	204	202	0.0103731
EGR3	656.983	5670.04	426.915	0.0752932	-3.73134	1.56704e-14	1.79739e-11	down-regulation	207.183	204	202	0.0451531
ELANE	6.74957	57.3925	4.42537	0.0771072	-3.69699	5.70722e-05	0.00309689	down-regulation	1.46227	203	203	0.040323
EML1	695.815	3211.34	580.368	0.180724	-2.46814	7.21542e-07	6.50424e-05	down-regulation	401.967	203	203	0.0229231
EMP1	9085.03	53140.9	7063.15	0.132914	-2.91144	1.48116e-07	1.64775e-05	down-regulation	4092.91	203	203	2.66e-05
EPHA3	380.121	1967.65	307.263	0.156157	-2.67893	5.01138e-07	4.76267e-05	down-regulation	151.877	203	203	0.035228
F10	102.912	863.993	67.9828	0.0786844	-3.66778	1.18581e-07	1.34162e-05	down-regulation	33.7561	203	203	0.0423937
FAIM2	105.39	817.139	72.7248	0.0889993	-3.49006	2.69728e-06	0.000215672	down-regulation	19.7286	204	202	0.00879437
FAM129A	3679.28	32916.6	2337.47	0.0710117	-3.8158	8.06955e-09	1.34883e-06	down-regulation	1443.02	203	203	0.00853498
FAT4	306.011	1423.49	254.726	0.178945	-2.48241	4.15951e-05	0.0023732	down-regulation	142.825	204	202	0.0237963
FBLN5	1233.3	5695.88	1028.5	0.180568	-2.46938	9.32945e-11	3.47061e-08	down-regulation	700.645	204	202	0.0395223
FBXL22	171.564	1376.82	116.25	0.084434	-3.56603	8.49861e-07	7.47288e-05	down-regulation	62.9382	204	202	0.03821
FBXL7	371.793	1880.97	302.531	0.160838	-2.63632	2.69069e-06	0.000215664	down-regulation	203.256	203	203	0.0171856
FBXO32	3478.63	12530.3	3063.22	0.244464	-2.0323	1.84421e-05	0.00117743	down-regulation	1827.11	204	202	0.0155933
FERMT2	1928.36	11081.6	1508.28	0.136107	-2.87719	1.30088e-10	4.46095e-08	down-regulation	989.122	203	203	0.00303432
FGF10	39.3439	372.547	24.052	0.0645611	-3.95319	4.5689e-06	0.000340752	down-regulation	4.21791	204	202	0.00442023
FGF2	288.384	1593.68	228.479	0.143366	-2.80223	4.22176e-06	0.000316995	down-regulation	86.035	204	202	0.013031
FGF7	612.153	2953.62	504.694	0.170873	-2.549	6.5961e-07	6.02764e-05	down-regulation	172.416	203	203	0.0282957
FGFR1	2489.76	9570.64	2164.79	0.226191	-2.14439	0.00046169	0.0180084	down-regulation	1004.93	203	203	0.0160248
FHL1	3734.44	41976.9	1979.35	0.0471534	-4.4065	3.28148e-09	6.2731e-07	down-regulation	630.826	204	202	0.00228591
FILIP1L	2033.87	10319.3	1653.62	0.160245	-2.64165	5.41336e-10	1.45054e-07	down-regulation	1054.59	203	203	0.0056463
FLNA	69942.3	503613	50039.6	0.0993613	-3.33117	2.75947e-09	5.52941e-07	down-regulation	33717.4	203	203	0.0348148
FLNC	6245.04	86551.4	2559.48	0.0295718	-5.07963	4.30085e-07	4.20762e-05	down-regulation	557.835	204	202	0.000248461
FXYD6	1009.42	7709.66	701.919	0.0910441	-3.45729	3.84431e-10	1.12169e-07	down-regulation	244.584	203	203	0.00604191
GALNT15	236.237	1279.09	188.377	0.147275	-2.76342	0.000794238	0.0282856	down-regulation	65.8373	203	203	0.0145464
GAS7	1029.66	4109.46	888.317	0.216164	-2.2098	2.09904e-07	2.19561e-05	down-regulation	518.558	203	203	0.0399249
GATA6	359.84	2077.67	281.003	0.135249	-2.88631	2.24956e-08	3.19373e-06	down-regulation	166.173	204	202	0.0141403
GEM	1053.45	7171.77	772.657	0.107736	-3.21443	1.21987e-12	8.28093e-10	down-regulation	369.076	203	203	0.00549104
GHR	145.269	669.136	121.227	0.18117	-2.46459	0.00120632	0.0397287	down-regulation	43.5376	203	203	0.000145051
GPIHBP1	93.007	532.848	72.8211	0.136664	-2.8713	0.000142367	0.00666981	down-regulation	32.268	204	202	0.0108382
GSN	22785.4	104293	19044.7	0.182607	-2.45319	6.80954e-17	1.41566e-13	down-regulation	14804.2	204	202	0.000113588
GYPC	769.561	2904.51	671.58	0.23122	-2.11266	1.20955e-06	0.000103163	down-regulation	340.014	204	202	0.0196162
HIST1H1C	3809.81	699.39	3952.56	5.65144	2.49862	0.000827687	0.0292887	up-regulation	2073.16	204	202	0.0231649
HMMR	959.257	245.554	992.011	4.0399	2.01432	0.000845823	0.0297721	up-regulation	837.158	202	204	0.0267737
HSPB6	1969.42	24994.6	912.706	0.0365161	-4.77532	9.39047e-11	3.47061e-08	down-regulation	137.487	204	202	1.47e-05
HSPB7	788.612	7156.68	496.357	0.0693557	-3.84984	7.30541e-07	6.56757e-05	down-regulation	82.9767	204	202	0.000489026
HSPG2	10015.6	38136.1	8725.02	0.228787	-2.12793	1.31112e-06	0.000110131	down-regulation	6341.52	203	203	0.000754628
IGF2BP2	1380.79	286.222	1431.03	4.99971	2.32185	0.000325355	0.0133773	up-regulation	573.151	202	204	0.0291059
IGSF10	145.18	1215.33	96.0668	0.0790455	-3.66117	3.72796e-07	3.67962e-05	down-regulation	15.322	204	202	0.00216281
ITGA7	1298.87	7719.06	1004.22	0.130097	-2.94235	3.13156e-07	3.1375e-05	down-regulation	458.83	204	202	0.000882603
JAM2	359.84	1884.89	289.85	0.153775	-2.70111	1.95593e-07	2.05886e-05	down-regulation	190.897	204	202	0.0116038
JAM3	1102.61	6090.34	873.702	0.143457	-2.80131	1.48235e-09	3.52195e-07	down-regulation	527.499	203	203	0.00172543
JAZF1	517.742	1943.12	452.326	0.232783	-2.10294	0.000126795	0.00606846	down-regulation	334.574	203	203	0.0352827
JUN	12812.4	50877.8	11065.4	0.21749	-2.20098	3.33157e-11	1.60606e-08	down-regulation	8606.64	203	203	0.0273856
KCNB1	72.0221	917.403	33.2245	0.0362158	-4.78724	8.59281e-08	1.01356e-05	down-regulation	6.25409	204	202	0.0026927
KCNE4	468.741	3856.03	313.286	0.0812459	-3.62156	0.000197678	0.00882601	down-regulation	159.954	203	203	0.0236105
KCNMA1	760.87	7754.76	439.894	0.0567257	-4.13985	3.68228e-09	6.84267e-07	down-regulation	178.538	204	202	0.00789457
KIAA1644	303.721	3369.72	163.011	0.0483751	-4.36959	2.25634e-08	3.19373e-06	down-regulation	50.5207	203	203	4.07e-05
KLF17	15.6261	134.986	10.1482	0.0751798	-3.73351	0.000146354	0.00681816	down-regulation	1.66249	203	203	0.021691
LAMA2	907.925	4345.95	750.141	0.172607	-2.53444	2.56368e-09	5.26394e-07	down-regulation	470.402	203	203	6.69e-05
LINC00702	135.313	1075.92	92.1454	0.0856437	-3.54551	0.000642359	0.0237145	down-regulation	33.8471	203	203	0.00119993
LMCD1	2004.55	7566.86	1749.27	0.231176	-2.11294	1.3729e-05	0.000917003	down-regulation	894.61	203	203	0.0384956
LRFN5	105.651	761.216	75.5648	0.0992686	-3.33252	2.66665e-05	0.00160981	down-regulation	17.7203	204	202	0.0190719
MAMDC2	315.756	2617.74	210.109	0.0802633	-3.63912	5.79019e-10	1.51653e-07	down-regulation	63.6422	204	202	0.0192603
MAOB	695.347	4924.09	501.274	0.1018	-3.29618	2.9092e-05	0.00173421	down-regulation	135.21	203	203	0.0034949
MAP1A	950.64	6378.9	701.517	0.109975	-3.18476	2.72547e-07	2.7809e-05	down-regulation	346.787	203	203	0.000230805
MAP1B	2449.66	17720.2	1748.84	0.098692	-3.34092	1.61616e-08	2.42515e-06	down-regulation	799.051	203	203	0.000207639
MCAM	5242.25	18815.5	4619.32	0.245506	-2.02617	2.19565e-08	3.15374e-06	down-regulation	3345.77	203	203	0.033502
MEF2C-AS1	14.7147	102.54	10.6841	0.104194	-3.26265	0.000848092	0.0298143	down-regulation	4.54395	203	203	0.00347392
MFAP4	3952.45	26017.3	2939.81	0.112995	-3.14568	4.13675e-19	1.14667e-15	down-regulation	1200.51	203	203	0.00175079
MFAP5	783.887	3754.61	647.549	0.172468	-2.5356	0.000299754	0.0124856	down-regulation	126.861	203	203	0.0112075
MIR100HG	490.32	2974.36	376.318	0.126521	-2.98255	3.05477e-10	9.0724e-08	down-regulation	174.711	203	203	0.000916684
MKX	77.31	534.847	56.3119	0.105286	-3.24762	0.00100754	0.0343378	down-regulation	18.1696	203	203	0.0440733
MRGPRF	796.224	5047	601.14	0.119108	-3.06966	1.75026e-13	1.38616e-10	down-regulation	254.556	203	203	0.0348342
MRVI1	1423.19	9210.83	1065.79	0.11571	-3.11141	9.04407e-11	3.45785e-08	down-regulation	565.845	203	203	0.019636
MSRB3	1740.48	14228.7	1167.35	0.0820423	-3.60749	4.28087e-09	7.82388e-07	down-regulation	554.196	203	203	0.000541545
MXRA7	2915.85	12385.8	2481.24	0.20033	-2.31955	1.49068e-10	5.05355e-08	down-regulation	1968.34	203	203	0.000114336
MYADM	4937.74	22249.9	4143.22	0.186213	-2.42497	1.40858e-13	1.19625e-10	down-regulation	2557.85	203	203	0.0149798
MYH11	63311	951336	22556.3	0.0237101	-5.39836	2.18746e-08	3.15374e-06	down-regulation	2248.83	204	202	0.0379056
MYLK	9274.77	100452	5090.33	0.0506745	-4.3026	4.59642e-09	8.26436e-07	down-regulation	2137.53	203	203	0.00257876
NCAM1	757.629	6295.39	503.481	0.0799762	-3.64429	8.16589e-05	0.00415324	down-regulation	54.4464	204	202	0.000360944
NEGR1	421.156	4386.36	239.179	0.0545279	-4.19686	1.35235e-12	8.99661e-10	down-regulation	89.7018	203	203	0.000784142
NFIA	1744.4	6327.67	1534.05	0.242436	-2.04433	2.5426e-07	2.61033e-05	down-regulation	1197.29	202	204	0.00191317
NOVA1	102.266	542.289	82.0718	0.151343	-2.7241	0.00110719	0.0369533	down-regulation	24.5128	204	202	0.0366068
NRXN1	53.5956	440.113	35.8569	0.0814718	-3.61755	0.000312795	0.0129877	down-regulation	2.50028	204	202	0.0121453
NT5DC3	686.29	3841.99	541.463	0.140933	-2.82692	1.42339e-08	2.20764e-06	down-regulation	412.911	203	203	0.0244764
NTRK3	74.0383	692.231	45.6671	0.0659709	-3.92203	1.27281e-08	2.03545e-06	down-regulation	11.3497	204	202	0.0405842
NXPH4	469.002	35.909	488.878	13.6144	3.76706	1.97764e-05	0.00125061	up-regulation	140.431	203	203	0.00953626
OGN	359.804	4238.18	181.811	0.0428985	-4.54293	6.30064e-14	6.16407e-11	down-regulation	15.0681	204	202	0.000553288
OLFML1	264.923	1102.22	226.496	0.205491	-2.28285	9.88902e-05	0.00488764	down-regulation	144.1	203	203	0.0334309
OMD	83.4289	513.453	63.6935	0.124049	-3.01102	0.000292356	0.012243	down-regulation	8.68443	203	203	0.0134063
OSBPL10	1269.77	4635.66	1115.29	0.24059	-2.05535	4.24731e-06	0.000318194	down-regulation	895.554	204	202	0.00128668
PALLD	9142.41	61179.1	6754.25	0.110401	-3.17917	2.19326e-10	6.63222e-08	down-regulation	4888.14	203	203	0.0019299
PAQR4	808.513	194.828	836.677	4.29443	2.10247	0.00158115	0.0492979	up-regulation	680.183	203	203	0.0472362
PCDH18	445.154	1621.77	391.155	0.241191	-2.05175	0.000151595	0.00702297	down-regulation	252.009	203	203	0.0146119
PDE1A	197.444	1200.64	151.404	0.126102	-2.98734	5.45438e-06	0.00039787	down-regulation	79.2414	204	202	0.0234526
PDE1C	166.223	1490.53	105.446	0.0707439	-3.82125	2.19964e-08	3.15374e-06	down-regulation	41.2013	203	203	0.0161721
PDE2A	441.274	2310.05	355.509	0.153897	-2.69996	7.22253e-06	0.000514439	down-regulation	207.491	204	202	0.0077318
PDE4B	536.045	1989.72	469.33	0.235877	-2.08389	1.63204e-05	0.00106236	down-regulation	256.403	204	202	0.0264545
PDE5A	856.198	4182.06	703.561	0.168233	-2.57146	1.05361e-06	9.10291e-05	down-regulation	431.275	204	202	0.0161992
PDLIM3	2514.34	17166.8	1841.88	0.107293	-3.22037	5.5774e-10	1.47239e-07	down-regulation	717.446	203	203	0.00457967
PDZRN3	692.797	4430.99	521.238	0.117635	-3.08762	9.91077e-11	3.60253e-08	down-regulation	247.059	204	202	0.0489686
PDZRN4	151.844	1993.66	67.3164	0.0337652	-4.88832	3.02727e-08	4.09334e-06	down-regulation	9.14434	204	202	0.0217954
PGM5P4	10.404	153.819	3.82214	0.0248482	-5.33071	4.64526e-09	8.30728e-07	down-regulation	0.783419	204	202	0.0474245
PGR	78.0571	569.718	55.493	0.0974043	-3.35987	1.17625e-05	0.000798481	down-regulation	25.7509	203	203	0.0161169
PHYHIP	251.786	1322.4	202.652	0.153246	-2.70608	1.43846e-06	0.000119619	down-regulation	71.6506	202	204	0.0463912
PID1	226.317	1474.38	169.039	0.114651	-3.12468	5.10762e-07	4.84031e-05	down-regulation	82.6087	203	203	0.000264076
PLA2G5	116.595	789.884	85.6954	0.108491	-3.20435	0.000136981	0.0064538	down-regulation	28.3514	204	202	0.0492143
PLAC9	244.431	1502.49	186.693	0.124256	-3.00861	4.33533e-08	5.53561e-06	down-regulation	89.7313	204	202	0.00894354
PLIN4	1799.33	8968.77	1470.29	0.163935	-2.6088	2.11364e-09	4.56981e-07	down-regulation	837.727	204	202	0.0082422
PLK1	2436.02	543.212	2522.89	4.64439	2.21549	1.39299e-05	0.0009267	up-regulation	2225.89	202	204	0.00235264
PLN	686.505	6958.31	398.669	0.0572939	-4.12548	6.02756e-07	5.53853e-05	down-regulation	88.9679	204	202	0.0343707
PLPPR4	149.583	1223.04	100.318	0.0820232	-3.60782	2.58219e-09	5.2694e-07	down-regulation	57.2221	203	203	0.0138107
PLSCR4	447.273	1605.17	394.133	0.24554	-2.02597	0.000234507	0.0101966	down-regulation	293.873	203	203	0.00770368
PMP2	18.9874	144.334	13.2347	0.0916948	-3.44702	0.0012344	0.0403337	down-regulation	1.54666	204	202	0.00591095
PRELP	1633.8	14116.6	1060.92	0.0751537	-3.73401	1.2247e-10	4.28812e-08	down-regulation	366.791	204	202	0.00277082
PRKG1	362.816	2172.19	279.777	0.128799	-2.95681	9.2238e-08	1.07277e-05	down-regulation	156.413	203	203	0.00095353
PRRG3	35.8882	210.246	27.8863	0.132637	-2.91445	0.00110559	0.0369533	down-regulation	9.57289	204	202	0.0423787
PRUNE2	1243.18	14190	649.003	0.0457367	-4.4505	6.35317e-08	7.85596e-06	down-regulation	121.477	204	202	0.0488788
PTGER3	228.187	947.9	195.157	0.205883	-2.2801	0.00108901	0.0366636	down-regulation	51.3995	203	203	0.001214
PTGFR	153.283	1213.13	104.643	0.0862584	-3.53519	1.46241e-06	0.000121005	down-regulation	37.1682	203	203	0.0203185
PTGIS	2376.84	17946.9	1662.27	0.0926215	-3.43251	1.38767e-07	1.55415e-05	down-regulation	403.599	203	203	0.000639851
PTGS1	3350.91	37061.9	1803.79	0.0486697	-4.36083	1.84579e-09	4.16998e-07	down-regulation	643.207	204	202	0.0434019
PTRF	13711.9	49377.2	12075.1	0.244547	-2.03181	1.13387e-07	1.29608e-05	down-regulation	7207.8	203	203	0.0304136
RAB23	653.87	4080.93	496.589	0.121685	-3.03877	1.82459e-08	2.69739e-06	down-regulation	366.424	203	203	0.00280099
RAC3	720.817	109.995	748.85	6.80806	2.76724	0.000382717	0.0154464	up-regulation	466.69	203	203	0.0225434
RAMP1	837.479	3650.87	708.362	0.194026	-2.36568	2.02219e-06	0.00016446	down-regulation	243.869	203	203	0.0347587
RASL12	574.124	3704.51	430.458	0.116198	-3.10534	4.28807e-10	1.20876e-07	down-regulation	231.909	203	203	0.0131325
RASSF3	1911.03	8563.84	1605.71	0.187498	-2.41505	2.69573e-09	5.46757e-07	down-regulation	1337.79	203	203	0.00231913
RBMS3	398.785	1627.06	342.415	0.210451	-2.24845	5.97657e-05	0.00319612	down-regulation	185.959	203	203	0.000544237
REEP1	257.246	2406.77	158.596	0.0658959	-3.92367	5.38498e-07	5.07424e-05	down-regulation	39.5473	204	202	0.00161225
RGS2	2729.93	15691.2	2135.09	0.136069	-2.87759	1.59136e-12	1.03791e-09	down-regulation	1146.74	204	202	0.0183352
RGS22	17.2086	115.528	12.6964	0.109899	-3.18575	0.000607231	0.0227203	down-regulation	4.87462	204	202	0.00606359
RHBG	641.685	76.3166	667.632	8.74819	3.12898	0.000893401	0.03102	up-regulation	173.174	204	202	0.00101562
RP11-1069G10.1	34.2261	432.572	15.9445	0.0368597	-4.76181	2.55161e-05	0.00156019	down-regulation	5.78318	203	203	0.0396395
RP11-753H16.3	21.4786	233.352	11.7549	0.050374	-4.31118	1.29534e-06	0.00010908	down-regulation	2.2676	203	203	0.0240112
RP11-867G23.10	34.7538	372.897	19.2351	0.0515829	-4.27696	9.89213e-07	8.60704e-05	down-regulation	6.32362	204	202	0.01118
RUNX1T1	148.782	771.631	120.197	0.155769	-2.68252	0.00111438	0.0371418	down-regulation	52.7362	203	203	0.0134551
SAPCD2	1485.58	279.533	1540.93	5.51252	2.46271	2.2418e-05	0.00139642	up-regulation	1173.92	203	203	0.0291623
SBK1	1112.61	183.14	1155.27	6.30811	2.65721	0.00108285	0.0364932	up-regulation	460.631	203	203	0.0482125
SCN4B	168.181	703.695	143.604	0.204072	-2.29285	0.00102565	0.034848	down-regulation	80.6907	203	203	0.000914197
SCN7A	88.7216	791.407	56.4728	0.0713575	-3.80879	1.13671e-05	0.000773219	down-regulation	5.54106	204	202	0.000226899
SCRG1	114.122	614.726	91.1479	0.148274	-2.75366	0.00130632	0.0420234	down-regulation	7.27055	204	202	0.008687
SDPR	871.616	7917.8	548.241	0.0692415	-3.85222	6.54808e-16	1.14636e-12	down-regulation	227.891	204	202	0.0206216
SETBP1	525.983	1983.62	459.087	0.23144	-2.11129	0.000204073	0.00907499	down-regulation	318.28	203	203	0.000404031
SFRP1	900.598	5118.21	707.036	0.138141	-2.85578	3.68888e-06	0.000282726	down-regulation	124.213	204	202	0.0477278
SGCD	342.317	2413.49	247.263	0.10245	-3.287	8.31091e-08	9.87306e-06	down-regulation	109.126	203	203	0.0105941
SHISA6	36.7309	209.57	28.7987	0.137418	-2.86335	0.00113897	0.0377722	down-regulation	6.04379	204	202	0.0418351
SLC24A3	504.771	2223.72	425.882	0.191518	-2.38445	1.42686e-06	0.000118952	down-regulation	236.494	203	203	0.00447976
SLIT2	404.679	2248.69	320.051	0.142328	-2.81271	2.74068e-08	3.79847e-06	down-regulation	135.484	203	203	0.011999
SLMAP	3503.65	18231.9	2827.72	0.155097	-2.68876	1.5644e-10	5.15213e-08	down-regulation	2445.84	203	203	0.0306473
SMOC2	1768.44	10795.5	1354.15	0.125437	-2.99497	1.55193e-10	5.15213e-08	down-regulation	498.437	204	202	0.0119867
SOBP	264.478	1844.58	191.961	0.104067	-3.26441	1.10415e-07	1.26645e-05	down-regulation	105.006	204	202	0.0465513
SORBS1	3787.64	42341.1	2018.28	0.0476672	-4.39086	4.24692e-08	5.45426e-06	down-regulation	586.243	204	202	0.0490533
SORCS1	43.3089	485.835	22.9998	0.0473407	-4.40077	5.73428e-09	9.88286e-07	down-regulation	4.35741	204	202	0.000722844
SPARCL1	7629.47	50617.5	5656.58	0.111751	-3.16163	5.67872e-14	5.72398e-11	down-regulation	3006.79	204	202	0.000905839
SPEG	955.186	6460.2	702.54	0.108749	-3.20093	1.08763e-08	1.74772e-06	down-regulation	289.776	202	204	0.0283118
SPON1	1745.92	7918.37	1462.64	0.184715	-2.43663	8.86215e-08	1.03432e-05	down-regulation	539.983	203	203	0.00329746
SRPX	902.632	4148.94	753.647	0.181648	-2.46078	1.44665e-08	2.22778e-06	down-regulation	274.975	204	202	0.0437015
STON1	561.92	2802.57	459.089	0.16381	-2.6099	8.65536e-08	1.01733e-05	down-regulation	295.456	203	203	0.0168675
STON1-GTF2A1L	8.24576	65.9893	5.59569	0.0847969	-3.55984	0.000812247	0.0288652	down-regulation	1.8118	203	203	0.0466671
SVIL	6274.11	38043.7	4816.08	0.126593	-2.98172	2.25673e-09	4.75098e-07	down-regulation	3737.24	202	204	0.000396728
SYNM	7139.89	108914	2469.11	0.0226703	-5.46305	2.85883e-08	3.89727e-06	down-regulation	455.698	204	202	0.0140811
SYNPO2	7898.84	112113	3116.06	0.027794	-5.16909	2.9474e-07	2.98901e-05	down-regulation	641.452	204	202	0.00186509
TAGLN	24087.1	173544	17227.9	0.0992714	-3.33248	2.41789e-08	3.38992e-06	down-regulation	6488.37	203	203	0.0163199
TCEAL2	86.2351	613.903	62.0185	0.101023	-3.30724	0.000819821	0.0290722	down-regulation	8.08948	203	203	0.0194579
TGFB1I1	1883.33	8041.7	1600.7	0.19905	-2.32879	2.80611e-09	5.58919e-07	down-regulation	1003.68	203	203	0.000465724
THBS1	20344.7	111484	16161.9	0.144971	-2.78616	1.10017e-05	0.000751434	down-regulation	9448.38	203	203	0.0296572
THSD4	1122.89	4636.5	961.642	0.207407	-2.26946	1.73408e-09	3.95072e-07	down-regulation	711.944	203	203	0.00875344
TMEM100	77.2711	516.217	57.1262	0.110663	-3.17576	1.52674e-05	0.00100166	down-regulation	19.4338	204	202	0.00633513
TMEM132A	4102.65	922.863	4248.58	4.6037	2.20279	3.64991e-06	0.000280385	up-regulation	3546.89	203	203	0.00170915
TMEM35A	160.848	1168.11	114.621	0.0981256	-3.34923	1.34555e-05	0.000902359	down-regulation	22.5611	203	203	0.0316148
TMOD1	230.484	1879.9	154.786	0.0823373	-3.60231	1.03479e-08	1.67903e-06	down-regulation	56.654	203	203	0.00067247
TNFAIP8L3	226.644	1071.27	187.881	0.175381	-2.51143	0.000150497	0.00698186	down-regulation	95.2083	203	203	0.00076319
TNS1	9802.4	108080	5292.06	0.0489642	-4.35213	1.84599e-08	2.71696e-06	down-regulation	2354.58	203	203	0.00249161
TPM1	13877.1	107967	9558.95	0.0885355	-3.4976	4.47159e-09	8.12778e-07	down-regulation	6253.51	203	203	0.00206345
TPM2	15739.6	104805	11652.1	0.111179	-3.16904	1.15899e-07	1.31575e-05	down-regulation	5800.15	203	203	0.0311754
TSHZ3	542.659	2065.6	472.766	0.228875	-2.12737	0.000155427	0.0071805	down-regulation	279.927	203	203	0.00904572
TSPAN2	619.282	2909.92	514.156	0.176691	-2.5007	5.63905e-07	5.25411e-05	down-regulation	258.317	203	203	0.0152032
TTLL7	439.879	1885.27	373.544	0.198138	-2.33542	5.75328e-05	0.00311173	down-regulation	239.478	203	203	0.0056783
VEGFD	70.2945	610.165	45.5179	0.0745993	-3.74469	7.88461e-06	0.000558012	down-regulation	17.729	204	202	0.0463628
VSTM4	561.208	2668.61	464.491	0.174057	-2.52237	2.99424e-08	4.0652e-06	down-regulation	316.553	203	203	0.00360905
WWTR1	2824.61	10864.6	2455.62	0.226021	-2.14547	3.67161e-09	6.84267e-07	down-regulation	1935.16	203	203	0.00673622
ZFHX4	360.16	1364.86	314.051	0.230097	-2.11968	0.00135669	0.0432256	down-regulation	129.41	203	203	0.0320637
ZFPM2	221.091	1213.26	175.556	0.144697	-2.78889	0.000100655	0.00496071	down-regulation	102.708	203	203	0.0160029

## Sheet: Stratified analysis
	TAGLN gene expression				ACTA2 gene expression level				MYH11 gene expression level				CALD1 gene expression level				MYLK gene expression level				GEM gene expression level				PRELP gene expression level				TPM2 gene expression level			OGN gene expression level
Tumor Stage	Low	High	HR(95%CI)	Crude P-value	Low	High	HR(95%CI)	Crude P-value	Low	High	HR(95%CI)	Crude P-value	Low	High	HR(95%CI)	Crude P-value	Low	High	HR(95%CI)	Crude P-value	Low	High	HR(95%CI)	Crude P-value	Low	High	HR(95%CI)	Crude P-value	Low	High	HR(95%CI)	Crude P-value	Low	High	HR(95%CI)	Crude P-value
[truncated: 3 more rows]

## Sheet: Joint effects analysis
Tumor stage	Gene expression levels	Patients	HR(95%CI)	Crude P-value
Stage IV	High TAGLN	91	1
Stage III	High TAGLN	73	0.585(0.385-0.890)	0.012
[truncated: 61 more rows]
